# Supplementary material for: A spatio-temporally constrained gene regulatory network directed by PBX1/2 acquires limb patterning specificity via HAND2
Source: bioRxiv preprint, doi:10.1101/2022.03.08.483529, version 1 (2022-03-09)
Supplement: Supplementary Table 2 [file 483529_file04.xlsx]

## Sheet: Pbx1
Chrom	Start	End	-log10(pvalue)
chr1	3670453	3672489	21.98
chr1	4491596	4493986	10.3
chr1	4571201	4572666	51.32
chr1	4671657	4673065	30.21
chr1	4785049	4786298	16.99
chr1	4807179	4808576	22.19
chr1	4843314	4844342	14.88
chr1	4856964	4858652	46.72
chr1	5082581	5083676	20.62
chr1	6213893	6215684	51.4
chr1	6382408	6383544	12.3
chr1	7052411	7053443	13.08
chr1	7088013	7089760	241.62
chr1	7100320	7101222	13.09
chr1	7313055	7313951	11.36
chr1	7397184	7399106	310
chr1	7547811	7549012	40.38
chr1	7776760	7779122	83.16
chr1	9221016	9222041	46.47
chr1	9544836	9546223	21.14
chr1	9563739	9565825	42.82
chr1	9577518	9579575	75.17
chr1	9582969	9585021	112.7
chr1	9699435	9701225	43.34
chr1	9747289	9748976	20.39
chr1	9797513	9798857	19.75
chr1	9847562	9848981	10.99
chr1	9966699	9968697	70.81
chr1	9988171	9989528	76.91
chr1	10039238	10040685	29.99
chr1	10210796	10211553	11.6
chr1	10231123	10233649	36.6
chr1	10280837	10281932	14.48
chr1	10285789	10286767	12.73
chr1	10595978	10596983	14.61
chr1	10699717	10700518	10.92
chr1	10992313	10994395	71.96
chr1	11328964	11330120	20.22
chr1	11413492	11415009	26.72
chr1	11696391	11697508	17.25
chr1	12192765	12193876	22.01
chr1	12397810	12398966	37.52
chr1	12435058	12436965	25.52
chr1	12437630	12438471	12.79
chr1	12477915	12479933	33.87
chr1	12509763	12511210	26.46
chr1	12644614	12644996	10.68
chr1	12691499	12693524	36.76
chr1	12718034	12719030	8.16
chr1	12748245	12749266	16.16
chr1	12776291	12777430	18.17
chr1	12791510	12792813	21.27
chr1	12834141	12836588	16.51
chr1	12989958	12993378	33.56
chr1	13371667	13375057	310
chr1	13588844	13590329	11.66
chr1	13659830	13661196	123.17
chr1	13729451	13730680	23.22
chr1	13770582	13771848	88.44
chr1	13807357	13809019	74.35
chr1	13834676	13835732	18.59
chr1	13836151	13837165	32.4
chr1	13860687	13861832	24.85
chr1	13934601	13936719	45.71
chr1	13991450	13993770	74.51
chr1	14145687	14146754	54.32
chr1	14207225	14208875	26.44
chr1	14304119	14305402	13.1
chr1	14306812	14307872	12.6
chr1	14309273	14310758	17.4
chr1	14356548	14358460	26.67
chr1	14429047	14429856	13.31
chr1	14464565	14465747	12.2
chr1	14502931	14503843	14.08
chr1	14506228	14507385	12.3
chr1	14511364	14512935	12.42
chr1	14516964	14517944	10.24
chr1	14569641	14571450	127.51
chr1	14609032	14609819	20.04
chr1	14635077	14636566	80.39
chr1	14661319	14663515	46.27
chr1	14672296	14673236	10.75
chr1	14841768	14843405	103.22
chr1	15033986	15034840	14.51
chr1	15222963	15223714	15.02
chr1	15286106	15287585	11.41
chr1	15405764	15406582	13.81
chr1	15442839	15443972	25.09
chr1	15451288	15453221	212.93
chr1	15804923	15806745	62.18
chr1	16092577	16093798	10.48
chr1	16104076	16106590	133.24
chr1	16114861	16115941	12.61
chr1	16126640	16128460	136.12
chr1	16128913	16129931	14.41
chr1	16217460	16219095	12.69
chr1	16227074	16228793	13.38
chr1	16228922	16230620	310
chr1	16231206	16232467	29.78
chr1	16248347	16251092	206.4
chr1	16292753	16294767	145.42
chr1	16518394	16520550	34.54
chr1	16618414	16619874	36.38
chr1	16656156	16657980	9.75
chr1	16664817	16666053	32.49
chr1	16796341	16797318	8.65
chr1	17096422	17098628	31
chr1	17237867	17238650	13.76
chr1	17537834	17538949	15.4
chr1	17569929	17570961	22.86
chr1	17726359	17727958	12.66
chr1	18223278	18224645	24.76
chr1	19221464	19222258	10.4
chr1	19240650	19242104	14.5
chr1	19458689	19460457	38.58
chr1	19973450	19974804	37.3
chr1	20134703	20135867	14.68
chr1	20190289	20191174	13.99
chr1	20477356	20478582	20.78
chr1	20890021	20891369	25.56
chr1	20951106	20952265	11.18
chr1	21486188	21487127	34.44
chr1	21535435	21536326	10.25
chr1	21918478	21920028	54.6
chr1	21960176	21962639	51.97
chr1	21993210	21994312	11.48
chr1	22248516	22249615	25.8
chr1	22252438	22253405	10.4
chr1	22268644	22269598	10.01
chr1	22292603	22294317	77.97
chr1	22532867	22534578	13.36
chr1	22804952	22806787	13.78
chr1	23255580	23257513	48.26
chr1	23382228	23384122	40.78
chr1	23638271	23639690	18.19
chr1	23761417	23763748	17.83
chr1	23921443	23922950	11.12
chr1	24005149	24006336	32.84
chr1	24099381	24101302	31.43
chr1	24134836	24135656	10.65
chr1	24194352	24197069	97.37
chr1	24239651	24240747	15.08
chr1	24286094	24287249	28.49
chr1	24553165	24553967	15.44
chr1	24678033	24679456	25.82
chr1	24816300	24817177	21.98
chr1	25106255	25107355	24.33
chr1	25829290	25831251	44.6
chr1	28025438	28026301	7.32
chr1	28420057	28421100	27.79
chr1	28565187	28566331	77.18
chr1	28733306	28734170	12.43
chr1	29147951	29148824	11.69
chr1	29187425	29188269	10.31
chr1	29690244	29691407	21.72
chr1	29939033	29939877	20.27
chr1	30216504	30217463	9.97
chr1	30414604	30415789	83.01
chr1	30536702	30538202	22.5
chr1	30636337	30637399	16.23
chr1	30714749	30715827	29.4
chr1	30872713	30874472	46.84
chr1	30948718	30950626	60.81
chr1	31057798	31059656	133.36
chr1	31072531	31073604	11.86
chr1	31149377	31150287	24.02
chr1	32171898	32173419	274.47
chr1	32930365	32931058	15.45
chr1	33173428	33174582	26.82
chr1	33201350	33202380	13.62
chr1	33421310	33422203	12.61
chr1	33459930	33460815	12.73
chr1	33463842	33466062	60.56
chr1	33472326	33473078	15.69
chr1	33669257	33670853	28.21
chr1	33719499	33720801	11.32
chr1	33756723	33758363	26.09
chr1	33813598	33815105	37.99
chr1	33906756	33908685	15.58
chr1	33969440	33970964	39.38
chr1	34003790	34004744	13.78
chr1	34010769	34012792	21.15
chr1	34032681	34034058	13.73
chr1	34094919	34095847	10.34
chr1	34142789	34143912	18.81
chr1	34235743	34237053	33.07
chr1	34438701	34440349	55.52
chr1	34458971	34460609	103.83
chr1	34783181	34784338	20.48
chr1	34801247	34802715	29.56
chr1	34842159	34843347	25.48
chr1	35385084	35386269	27.03
chr1	35457360	35458162	14.76
chr1	35527538	35528726	17.54
chr1	35806314	35807438	11.05
chr1	35810606	35812122	15.09
chr1	35943025	35944555	41.43
chr1	35953244	35954544	22.52
chr1	36003141	36004421	22.4
chr1	36016304	36017870	18.49
chr1	36067718	36069921	39.32
chr1	36137622	36138775	10.9
chr1	36243513	36244783	11.66
chr1	36307214	36308785	30.96
chr1	36368355	36369608	11.16
chr1	36444515	36445603	21.18
chr1	36470897	36472542	23.99
chr1	36511249	36513285	25.32
chr1	36555676	36559638	57.58
chr1	36690554	36692185	173.37
chr1	36709012	36710738	305.89
chr1	36723206	36724601	11.48
chr1	36914112	36914954	10.34
chr1	36937323	36938446	20.86
chr1	36938613	36940429	24.37
chr1	37028756	37029989	21.38
chr1	37045053	37046338	49.3
chr1	37124400	37125825	30.37
chr1	37217782	37219170	31.57
chr1	37220017	37220777	11.02
chr1	37299336	37301549	41.77
chr1	37429408	37430774	14.74
chr1	37539979	37541865	310
chr1	37611597	37612710	8.3
chr1	37698054	37698879	11.38
chr1	37864231	37866039	49.1
chr1	37889766	37891165	15.85
chr1	37996432	37998891	53.06
chr1	38103451	38104578	17.09
chr1	38128685	38130583	13.26
chr1	38247411	38248879	45.58
chr1	38262094	38263191	13.16
chr1	38394889	38395985	13.61
chr1	38436221	38437408	22.28
chr1	38438059	38440985	110.83
chr1	38442849	38444171	14.85
chr1	38457474	38458891	59.38
chr1	38467364	38468488	18.42
chr1	38510651	38513693	171.13
chr1	38515935	38516871	11.98
chr1	38544151	38547396	175.07
chr1	38549766	38550955	23.61
chr1	38562143	38563281	22.12
chr1	38587326	38588616	15.01
chr1	38594309	38595252	13.45
chr1	38625628	38628948	37.51
chr1	38630951	38632711	60.24
chr1	38757451	38758585	10.7
chr1	38766184	38768302	101.02
chr1	38835525	38837051	11.57
chr1	38986985	38988541	145.81
chr1	39083852	39085284	23.33
chr1	39191835	39194731	23.14
chr1	39367135	39368569	35.32
chr1	39477822	39479459	49.15
chr1	39535009	39536735	75.44
chr1	39564222	39565323	20.14
chr1	39576345	39577838	21.71
chr1	39618170	39619294	36.33
chr1	39735769	39736939	16.7
chr1	39900053	39902268	12.11
chr1	39935422	39937101	10.47
chr1	39949851	39950734	12.69
chr1	40233142	40234009	11.44
chr1	40680850	40682425	16.19
chr1	40790145	40791184	15.6
chr1	41034560	41035444	10.93
chr1	41267011	41268087	20.6
chr1	41271801	41272725	10.39
chr1	41358815	41359815	11.1
chr1	41389837	41390964	11.87
chr1	41610141	41611588	55.04
chr1	41652031	41653394	34.82
chr1	41810056	41811098	20.4
chr1	41887965	41889033	11.72
chr1	42242242	42243273	16.46
chr1	42243434	42244722	23.86
chr1	42257372	42258554	6.46
chr1	42259276	42260344	25.73
chr1	42299536	42300445	12.02
chr1	42472320	42473475	36.45
chr1	42628456	42629579	11.42
chr1	42693876	42699223	87.8
chr1	42714001	42715115	10.51
chr1	42877092	42878005	16.13
chr1	42952451	42954131	14.88
chr1	42982222	42983836	28.26
chr1	43097881	43099456	141.06
chr1	43360430	43361632	30.03
chr1	43422315	43423705	70.1
chr1	43444869	43446835	86.36
chr1	43486769	43487881	17.33
chr1	43826626	43828677	269.57
chr1	43895329	43897888	39.66
chr1	43933084	43934820	223.94
chr1	44101179	44103065	27.4
chr1	44118416	44120518	44.69
chr1	44147312	44148660	11.22
chr1	44553624	44554551	11.51
chr1	44849153	44850124	35.2
chr1	44957067	44958008	13.73
chr1	45310928	45312072	20.71
chr1	45460391	45461570	25.58
chr1	45501553	45503648	37.83
chr1	45676889	45678005	32.2
chr1	45760238	45762072	56.73
chr1	45794615	45796036	100.81
chr1	45864510	45866152	24.02
chr1	45867714	45868793	20.55
chr1	45881717	45882739	13.74
chr1	45904678	45906081	102.86
chr1	46066533	46067307	10.84
chr1	46425094	46426007	14.26
chr1	46852388	46854167	14.42
chr1	47019068	47020087	10.86
chr1	47432508	47433572	19.46
chr1	48453449	48454651	41.99
chr1	48516760	48518095	20.09
chr1	50794973	50795816	10.92
chr1	50926676	50928584	14.28
chr1	51090101	51090903	9.14
chr1	51148415	51150011	46.16
chr1	51332742	51334429	40.79
chr1	51462283	51463613	27.52
chr1	51477459	51479044	52.17
chr1	51508836	51509705	11
chr1	51600159	51601146	41.53
chr1	51649858	51651356	72.7
chr1	51696945	51698035	20.5
chr1	51821275	51822196	14.69
chr1	51914534	51916558	52.39
chr1	52098713	52099404	10.12
chr1	52113257	52114330	11.33
chr1	52118936	52120223	23.73
chr1	52231769	52234189	269
chr1	52306271	52307353	10.09
chr1	52396352	52398186	52.45
chr1	52427787	52428548	13.48
chr1	52483676	52484758	15.34
chr1	52499612	52501276	31.2
chr1	52626411	52627824	20.11
chr1	52652067	52653502	22.28
chr1	52726481	52727917	39.96
chr1	52816716	52818241	9.23
chr1	52844362	52845664	46.63
chr1	53085002	53086680	55.86
chr1	53201462	53202410	12.4
chr1	53296215	53297882	310
chr1	53312959	53313898	10.2
chr1	53352243	53353232	20.54
chr1	53784345	53785777	56.47
chr1	53939841	53941294	15.61
chr1	54134535	54135237	8.57
chr1	54193991	54195609	31.93
chr1	54556820	54558406	31.46
chr1	54702375	54703891	12
chr1	54712824	54713921	12.11
chr1	54793214	54794199	13.68
chr1	54823534	54824867	36.3
chr1	54906322	54907972	20.32
chr1	54913877	54914983	27.53
chr1	54915771	54917136	15.34
chr1	54925203	54927078	37.1
chr1	55025244	55028000	31.47
chr1	55052082	55053600	55.58
chr1	55087136	55088976	37.31
chr1	55130644	55132149	58.98
chr1	55209851	55210772	10.39
chr1	55236632	55238143	40.48
chr1	55362153	55364527	78.82
chr1	55405004	55407325	310
chr1	55796613	55797631	28.37
chr1	55820618	55822172	33.66
chr1	55887099	55888274	31.56
chr1	56183585	56185028	13.34
chr1	56286257	56287483	25.36
chr1	56745103	56745879	11.3
chr1	56861406	56862432	15.54
chr1	56933130	56934603	33.17
chr1	56965518	56967117	174.63
chr1	56970654	56974082	145.49
chr1	57095534	57097631	32.42
chr1	57204833	57205987	20.5
chr1	57377051	57378483	36.18
chr1	57429354	57430544	23.17
chr1	57489014	57490083	11.34
chr1	57773740	57776011	49.89
chr1	57939926	57941433	32.17
chr1	57961679	57962475	10.31
chr1	57969478	57970617	13.23
chr1	58199268	58200393	34.61
chr1	58392267	58394177	18.87
chr1	58423082	58424402	18.05
chr1	58444761	58445928	10.52
chr1	58504112	58505696	87.36
chr1	58585640	58587089	8.84
chr1	58950954	58951887	15.51
chr1	58972680	58974577	27.31
chr1	59119480	59120843	21.45
chr1	59236569	59237916	17.89
chr1	59256497	59258323	12.33
chr1	59269807	59271102	10.98
chr1	59303259	59304325	24.32
chr1	59309894	59311143	26.34
chr1	59314565	59315836	43.88
chr1	59321469	59322749	31.51
chr1	59326300	59327603	21.56
chr1	59331105	59332834	23.91
chr1	59333434	59335864	40.55
chr1	59340434	59342771	16.08
chr1	59367481	59369455	44.76
chr1	59370835	59372068	41.68
chr1	59422511	59423990	13.94
chr1	59449059	59450418	11
chr1	59450725	59452390	10.17
chr1	59457537	59459218	15.73
chr1	59480383	59484617	33.22
chr1	59492537	59494092	15.77
chr1	59515640	59517214	26.06
chr1	59518386	59521344	69.72
chr1	59578549	59581079	38.86
chr1	59762368	59764503	55.11
chr1	59887298	59888458	33.99
chr1	59912221	59914291	31.98
chr1	60042269	60043880	11.92
chr1	60097702	60099102	42.34
chr1	60179758	60181565	161.57
chr1	60342767	60344115	14.92
chr1	60408837	60410667	57.55
chr1	60565818	60567686	47.02
chr1	60734848	60736096	17.69
chr1	61095520	61096432	23.98
chr1	61098901	61099911	17.75
chr1	61101382	61102623	76.7
chr1	61111358	61114292	110.82
chr1	61119383	61120370	23.8
chr1	61138888	61139974	22.08
chr1	61144805	61146509	11.98
chr1	61233284	61234596	19.42
chr1	61297701	61299302	46.13
chr1	61300036	61301824	22.19
chr1	61305312	61306709	80.28
chr1	61358297	61359795	49.47
chr1	61394909	61396274	27.54
chr1	61406739	61408060	31.29
chr1	61460952	61462373	22.51
chr1	61638459	61639898	14.49
chr1	61651073	61652745	57.48
chr1	61928026	61929081	10.41
chr1	61939482	61940565	12.87
chr1	61942061	61943104	14.04
chr1	61983984	61985745	22.23
chr1	62016684	62017496	13.26
chr1	62017974	62019068	19.43
chr1	62019567	62020740	32.38
chr1	62050900	62051907	11.58
chr1	62085836	62086986	24.75
chr1	62155662	62156558	10.19
chr1	62196883	62198054	22.31
chr1	62324825	62326290	17
chr1	62374088	62375282	21.16
chr1	62382362	62383811	84.74
chr1	62437362	62438349	27.57
chr1	62617710	62619277	21.52
chr1	62644539	62645666	20.72
chr1	62647206	62649042	124.6
chr1	62682128	62683667	42.99
chr1	62697055	62698094	12.89
chr1	62702541	62704219	48.76
chr1	62705777	62708292	13.7
chr1	62737061	62738173	10.16
chr1	62777033	62778275	15.86
chr1	62779394	62781060	188.18
chr1	62812169	62813926	40.32
chr1	62827528	62828941	18.62
chr1	62850522	62852172	151.19
chr1	62860288	62861607	30.24
chr1	62887054	62888478	15.15
chr1	63112781	63114993	22.17
chr1	63176140	63177718	14.5
chr1	63180760	63181771	21.71
chr1	63203851	63204996	30.65
chr1	63225692	63226553	10.99
chr1	63272683	63274087	12
chr1	63367582	63368580	53.37
chr1	63414665	63415703	13.6
chr1	63445259	63446964	18.84
chr1	63453066	63453950	11.53
chr1	63552229	63553929	147.17
chr1	63562516	63563938	16.54
chr1	63669769	63670610	10.35
chr1	63677686	63678728	18.52
chr1	63730108	63731132	10.22
chr1	63808145	63809508	54.14
chr1	63993939	63995055	12.78
chr1	64087833	64088932	12.6
chr1	64120704	64122798	32.36
chr1	64301656	64302877	20.04
chr1	64304881	64306209	9.75
chr1	64308579	64309577	15.49
chr1	64310793	64312096	22.56
chr1	64374163	64375204	18.88
chr1	64380231	64382970	53.38
chr1	64391141	64392226	19.76
chr1	64445424	64447148	27.68
chr1	64531945	64533957	47.88
chr1	64616181	64618202	28.94
chr1	64666643	64667869	23.28
chr1	64690098	64691838	27.38
chr1	64735728	64738547	31.82
chr1	64878357	64879932	218.26
chr1	64945833	64946890	15.05
chr1	64956268	64957248	19.64
chr1	65178043	65180587	30.7
chr1	65186044	65187422	11.58
chr1	65388066	65389066	15.05
chr1	65999977	66001203	53.19
chr1	66003671	66005319	224.62
chr1	66174662	66176073	15.39
chr1	66244720	66245748	15.51
chr1	66250664	66251314	12.78
chr1	66282060	66283138	13.53
chr1	66321247	66322237	34.67
chr1	66815676	66818268	42.2
chr1	66862276	66863878	24.78
chr1	67038257	67039294	26.64
chr1	67044899	67045600	14.58
chr1	67140582	67142030	91.54
chr1	67465151	67466242	56.99
chr1	67640615	67641903	55.6
chr1	67794916	67795668	14.31
chr1	68046379	68048115	39.96
chr1	68632068	68632963	17.82
chr1	68787046	68788615	136.94
chr1	69305181	69306375	15.45
chr1	69466562	69467650	29.02
chr1	69685616	69688422	10.06
chr1	69826529	69827593	11.99
chr1	71101998	71103587	20.74
chr1	71556477	71557789	35.36
chr1	71652232	71654605	118.53
chr1	71681784	71683252	85.91
chr1	71683337	71684375	8.6
chr1	71763216	71764261	16.5
chr1	71836694	71838655	87.36
chr1	71844783	71845813	13.33
chr1	71849174	71850387	29.22
chr1	71865345	71866362	25.51
chr1	71899070	71900084	17.02
chr1	71903977	71905123	32.25
chr1	71937848	71939834	24.26
chr1	71946607	71948206	37.05
chr1	72002389	72004314	18.18
chr1	72005666	72006705	13.36
chr1	72019954	72021115	21.08
chr1	72029390	72030451	11.31
chr1	72034847	72035781	16.91
chr1	72105110	72106260	22.72
chr1	72108169	72109441	29.42
chr1	72182659	72183747	11.35
chr1	72187802	72188850	19.08
chr1	72211365	72212748	11.82
chr1	72235961	72236874	18.79
chr1	72243318	72245021	23.6
chr1	72306786	72308080	28.61
chr1	72535697	72537698	22.62
chr1	72577178	72579536	13.14
chr1	72582584	72583855	22.7
chr1	72707307	72708214	11.2
chr1	72736015	72737225	15.77
chr1	72777620	72778465	10.8
chr1	72826076	72828252	32.49
chr1	72872133	72874372	22.96
chr1	72959966	72961242	30.21
chr1	72968814	72970133	117.85
chr1	73030432	73031475	21.93
chr1	73045799	73047117	57.77
chr1	73071858	73073025	14.6
chr1	73221570	73222636	32.69
chr1	73259131	73260760	25.5
chr1	73302610	73303658	12.77
chr1	73306858	73307928	11.33
chr1	73336570	73338128	24.75
chr1	73362850	73364807	313.56
chr1	73365420	73366596	29.43
chr1	73373027	73374176	26.2
chr1	73381236	73382515	8.7
chr1	73398708	73399959	87.46
chr1	73424546	73425888	113.63
chr1	73433266	73434297	14.83
chr1	73437853	73439251	82.6
chr1	73594692	73595775	32.24
chr1	73757962	73759518	32.48
chr1	73764179	73765560	67.68
chr1	73775288	73776340	16.39
chr1	73948147	73949559	67.34
chr1	73962250	73963868	7.29
chr1	73968860	73969872	10.18
chr1	73972183	73973572	32.65
chr1	73999058	74002511	24
chr1	74024627	74026295	23.27
chr1	74067728	74069751	17.48
chr1	74097579	74100120	21.84
chr1	74102989	74104601	58.04
chr1	74123716	74125908	25.24
chr1	74179627	74180775	42.68
chr1	74235802	74237587	62.88
chr1	74274482	74276049	121.24
chr1	74283944	74285544	97.7
chr1	74331964	74333275	17.45
chr1	74386288	74387585	10.82
chr1	74390848	74393340	77.47
chr1	74396835	74398568	57.3
chr1	74505110	74507128	71.66
chr1	74587248	74589011	211.31
chr1	74661192	74662399	19.9
chr1	74769919	74772676	32.1
chr1	74796943	74798228	41.52
chr1	74802526	74804610	33.39
chr1	74806092	74808908	20.98
chr1	74854050	74856818	109.72
chr1	74857871	74859123	12.01
chr1	74897653	74899417	19.27
chr1	75124195	75125514	10.03
chr1	75141029	75143676	41.91
chr1	75168086	75169522	91.7
chr1	75191060	75192935	116.59
chr1	75218009	75220072	12.48
chr1	75235920	75237421	15.49
chr1	75262746	75264413	13.81
chr1	75316524	75318622	310
chr1	75337543	75340087	47.24
chr1	75343482	75346083	42.57
chr1	75358966	75361452	88.27
chr1	75374659	75376194	11.14
chr1	75381308	75383101	19.25
chr1	75398251	75401027	25.47
chr1	75421434	75423836	23.04
chr1	75435489	75436734	8.4
chr1	75438525	75439639	14.3
chr1	75442938	75449620	140.06
chr1	75449685	75452388	31.4
chr1	75455632	75459336	135.02
chr1	75478222	75480468	291.26
chr1	75504916	75507517	40.33
chr1	75520903	75522210	17
chr1	75545676	75548541	30.72
chr1	75603925	75605270	16.31
chr1	75645333	75646940	11.4
chr1	75662108	75664173	84.85
chr1	75695298	75696303	19.88
chr1	75748476	75749355	14.76
chr1	75834091	75835033	17.63
chr1	75844006	75845614	75.18
chr1	75925432	75926577	20.44
chr1	76009114	76010490	44.66
chr1	76011031	76012638	25.87
chr1	76031003	76032684	33.95
chr1	76040970	76041831	19.19
chr1	76049269	76050435	13.13
chr1	76065342	76066557	23.48
chr1	76080053	76080878	17.07
chr1	76107349	76108341	18.07
chr1	76257692	76258885	34.21
chr1	76322733	76323711	27.01
chr1	76372986	76374135	32.18
chr1	76528891	76531252	53.47
chr1	76551212	76552555	15.14
chr1	76771210	76772310	12.9
chr1	76831933	76833085	31.34
chr1	76849131	76850626	17.71
chr1	76864353	76867002	211.98
chr1	76871951	76872840	12.67
chr1	76880183	76881426	11.41
chr1	76895068	76896206	17.54
chr1	76905503	76906826	24.21
chr1	76972212	76973992	46.41
chr1	76974923	76976778	91.01
chr1	76981470	76982728	13.42
chr1	77047026	77048070	24.78
chr1	77140484	77141770	16.67
chr1	77226737	77228412	9.99
chr1	77265060	77266418	34.18
chr1	77279013	77280039	11.9
chr1	77288710	77290350	33.36
chr1	77304474	77305601	17.09
chr1	77314969	77316149	32.21
chr1	77336668	77337641	13.01
chr1	77337796	77339038	75.69
chr1	77339139	77340936	12.8
chr1	77386851	77387970	12.95
chr1	77396083	77397217	20.49
chr1	77434485	77435874	101.05
chr1	77446358	77447549	17.96
chr1	77457074	77458204	17.04
chr1	77483882	77484974	17.02
chr1	77491295	77492464	8.38
chr1	77493519	77494479	10.3
chr1	77502278	77503808	51.54
chr1	77510721	77513080	20.27
chr1	77513320	77516968	67.15
chr1	77521228	77522258	11.31
chr1	77596447	77598030	35.93
chr1	77616878	77618599	29.15
chr1	77806459	77807408	12.39
chr1	77847430	77848461	7.37
chr1	78021166	78022563	75.4
chr1	78102437	78104177	7.53
chr1	78109792	78111943	169.77
chr1	78128724	78130076	97.86
chr1	78139188	78141212	6.51
chr1	78141396	78142527	12.8
chr1	78186995	78188154	13.76
chr1	78337754	78339144	23.76
chr1	78451331	78452222	10.25
chr1	78488223	78489575	10.23
chr1	78657109	78658968	59.57
chr1	78816425	78817415	11.95
chr1	78840413	78841754	34.56
chr1	78945277	78946274	20.73
chr1	79183538	79184406	10.57
chr1	79314009	79315282	19.82
chr1	79406087	79407078	10.1
chr1	79671339	79672587	20.41
chr1	79760995	79762056	11.89
chr1	79857832	79859425	46.38
chr1	79859530	79861229	23.1
chr1	79977833	79978968	30.98
chr1	80220708	80221774	18.76
chr1	80339037	80341385	29.22
chr1	80358140	80359151	36.56
chr1	80656800	80657859	18.88
chr1	80757761	80759180	41.6
chr1	80777607	80778872	46.86
chr1	81285398	81286629	19.87
chr1	81577290	81578152	22.85
chr1	81592967	81594134	7.67
chr1	81608309	81609801	144.28
chr1	81744181	81745453	13.65
chr1	81857064	81858324	46.17
chr1	81903752	81904625	12.3
chr1	81916565	81917873	38.41
chr1	81939695	81941121	33.44
chr1	81949497	81950610	13.63
chr1	82041532	82042756	21.3
chr1	82106437	82107672	30.21
chr1	82112226	82113268	18.52
chr1	82135536	82136802	41.08
chr1	82202482	82203600	32.71
chr1	82257014	82258942	79.88
chr1	82282642	82284586	237.58
chr1	82288802	82293666	164.64
chr1	82374558	82376097	62.03
chr1	82388200	82389314	11.89
chr1	82410020	82411404	47.88
chr1	82452847	82453869	7.05
chr1	82537587	82538398	16.65
chr1	82544234	82544965	10.13
chr1	82724709	82725584	18.95
chr1	82838807	82840708	56.82
chr1	83034204	83035623	22.89
chr1	83168833	83169778	11.85
chr1	83326731	83327599	18.34
chr1	83350492	83351629	26.45
chr1	83407304	83408548	14.32
chr1	83870710	83871924	30.68
chr1	83896427	83897556	12.26
chr1	83969419	83970401	11.92
chr1	84076587	84077805	23.43
chr1	84284091	84285294	13.61
chr1	84314103	84314989	10.9
chr1	84506392	84507653	21.12
chr1	84620869	84621949	14.95
chr1	84838040	84840726	129.19
chr1	84862782	84864139	11.92
chr1	84934040	84935496	11.96
chr1	85792836	85794808	65.37
chr1	85894040	85896119	18.29
chr1	86017466	86019088	8.79
chr1	86154157	86155434	16.91
chr1	86299723	86300975	14.23
chr1	86302856	86304138	12.26
chr1	86358208	86360361	82.68
chr1	86433685	86435302	34.88
chr1	86486916	86488429	13.64
chr1	86502927	86506164	179.19
chr1	86510742	86511899	8.21
chr1	86524525	86528897	310
chr1	86581514	86583405	310
chr1	86586683	86587788	25.81
chr1	86632259	86633688	55.23
chr1	86669258	86671227	23.64
chr1	86703321	86704503	13.77
chr1	87153488	87155221	11.19
chr1	87170066	87171319	23.12
chr1	87171927	87174685	14.86
chr1	87213342	87214880	28.59
chr1	87326303	87328138	44.72
chr1	87509065	87511003	23.07
chr1	87755328	87756855	52.87
chr1	88007768	88009118	91.61
chr1	88205090	88206258	13.66
chr1	88275673	88278437	78.54
chr1	88474219	88476354	72.35
chr1	88510224	88511608	17.75
chr1	88553317	88554215	14.42
chr1	88590420	88591531	8.61
chr1	88612680	88613913	35.69
chr1	88639500	88640962	38.45
chr1	88700249	88702919	20.17
chr1	88752025	88753117	19.31
chr1	88757261	88758592	32.34
chr1	88809796	88810814	15.67
chr1	88847412	88848633	17.15
chr1	88874955	88876044	24.94
chr1	89009200	89010560	39.27
chr1	89021899	89022763	10.61
chr1	89024502	89025773	21.04
chr1	89032726	89034343	18.68
chr1	89039040	89040575	30.33
chr1	89069490	89071628	33.82
chr1	89081779	89083156	10.42
chr1	89166480	89168070	15.34
chr1	89173752	89175028	21.28
chr1	89189001	89191998	22.08
chr1	89234607	89235759	11.92
chr1	89454028	89456348	43.84
chr1	89509570	89510975	11.27
chr1	89537964	89539382	15.85
chr1	89576527	89577712	22.07
chr1	89579712	89582325	39.35
chr1	89646470	89648935	72.66
chr1	89702064	89704118	30.51
chr1	89713840	89714979	13.32
chr1	89750341	89751811	20.75
chr1	89824320	89825464	10.39
chr1	89848098	89850233	42.49
chr1	89921981	89923848	12.49
chr1	89925233	89928221	115.55
chr1	89928492	89932224	22.33
chr1	89939895	89942672	16.44
chr1	90049733	90050975	11.3
chr1	90118530	90120251	281.81
chr1	90152841	90155069	18.92
chr1	90169487	90170750	14.64
chr1	90234092	90236217	29.55
chr1	90252647	90254268	14.61
chr1	90267770	90269164	48.59
chr1	90297274	90298428	22.02
chr1	90299757	90301163	43.7
chr1	90334432	90335903	27.12
chr1	90351304	90352457	20.03
chr1	90352481	90354193	78.08
chr1	90374077	90375675	46.08
chr1	90442256	90443685	13.15
chr1	90451652	90452961	27.57
chr1	90462911	90464110	20.55
chr1	90476080	90477447	38.27
chr1	90504030	90505743	24.02
chr1	90506223	90507535	27.66
chr1	90543535	90545560	28.56
chr1	90553119	90554826	24.22
chr1	90603000	90604108	11.34
chr1	90743434	90744827	126.6
chr1	90749841	90751762	22.96
chr1	90885639	90886371	10.22
chr1	90998139	90999505	15.01
chr1	91052093	91053995	174.04
chr1	91297797	91299007	17.55
chr1	91397994	91399516	218.18
chr1	91411883	91415717	152.42
chr1	91458482	91460289	310
chr1	91539437	91541551	129.71
chr1	91584743	91586013	14.41
chr1	91611117	91612392	20.48
chr1	91676477	91677646	12.63
chr1	91731136	91732525	70.26
chr1	91756818	91758046	27.67
chr1	91758544	91760739	25.17
chr1	91798867	91802821	81.59
chr1	91815877	91817405	90.11
chr1	91818817	91820086	12.52
chr1	91844189	91845572	51.28
chr1	91870160	91874659	21.75
chr1	91914513	91915490	19.38
chr1	91952466	91953916	17.5
chr1	92083458	92084801	83.21
chr1	92173889	92174907	10.78
chr1	92179277	92181424	305.25
chr1	92211828	92213463	14.75
chr1	92285464	92286783	23.1
chr1	92337072	92338203	71.01
chr1	92397260	92399387	11.65
chr1	92473037	92474297	14.16
chr1	92641261	92642463	13.07
chr1	92680343	92681634	23.65
chr1	92698480	92699940	33.32
chr1	92771834	92773516	61.75
chr1	92790437	92792517	24.73
chr1	92830570	92833355	53.95
chr1	92847518	92849248	18.39
chr1	92906339	92907928	50.94
chr1	93099899	93102576	17.25
chr1	93175865	93177683	134.28
chr1	93211064	93212732	16.31
chr1	93234966	93236978	18.6
chr1	93305477	93306900	10.74
chr1	93342231	93344363	38.54
chr1	93444668	93446355	44.82
chr1	93477714	93479732	87.08
chr1	93511181	93513036	79.44
chr1	93634336	93636618	122.99
chr1	93753671	93755832	47.26
chr1	93803295	93804800	15.17
chr1	94077938	94078757	13.38
chr1	94205621	94206484	19.87
chr1	94712517	94713374	10.13
chr1	94713829	94714891	12.58
chr1	95294249	95295398	16.12
chr1	95313232	95314648	14.25
chr1	96362163	96364007	62.93
chr1	96401226	96402174	12.4
chr1	97660428	97662592	50.09
chr1	97769337	97770999	32.48
chr1	97903675	97904764	17.71
chr1	97974526	97975588	20.87
chr1	98094558	98096279	30.31
chr1	98189587	98190839	29.84
chr1	99867964	99868871	10.62
chr1	104932787	104933680	10.23
chr1	104956735	104957731	14.13
chr1	105118120	105119242	19.77
chr1	105175446	105176589	11.53
chr1	105355647	105357247	13.18
chr1	105663016	105665002	33.05
chr1	105971351	105972464	26.54
chr1	105989575	105991988	41.38
chr1	105992993	105995085	34.8
chr1	105999607	106000627	14.38
chr1	106086558	106087382	14.37
chr1	106170851	106173563	49.23
chr1	106289245	106290200	13.52
chr1	106351082	106352275	92.8
chr1	106465152	106466662	66.93
chr1	106602586	106604003	41.2
chr1	106629518	106630814	20.43
chr1	106665816	106667125	23.03
chr1	106758951	106760227	11.1
chr1	106795818	106797256	44.12
chr1	106901295	106902301	23.4
chr1	110446907	110448574	80.46
chr1	111699006	111700201	24.56
chr1	111864222	111865635	42.06
chr1	113932379	113933068	10.78
chr1	114038977	114040134	16.62
chr1	114152603	114153625	18.21
chr1	116125460	116126488	12.46
chr1	118310676	118312012	73.35
chr1	118388460	118390314	13.42
chr1	118776160	118777698	165.08
chr1	118795190	118796628	24.16
chr1	118825033	118826408	22.56
chr1	118857753	118858811	13.91
chr1	118880495	118881774	30.91
chr1	118901582	118903080	27.34
chr1	118904409	118905818	40.39
chr1	118912588	118914458	9.36
chr1	118916095	118918379	68.61
chr1	118981844	118983968	15.94
chr1	119033151	119036013	67.54
chr1	119046836	119049104	28.97
chr1	119051517	119054729	124.14
chr1	119096771	119098771	10.82
chr1	119420150	119423163	16.85
chr1	119503920	119505471	58.42
chr1	119525320	119527227	11.92
chr1	119544535	119545467	12.67
chr1	119641305	119643141	27.23
chr1	119648110	119649409	15.87
chr1	119735521	119736590	14.26
chr1	119836567	119838245	43.11
chr1	120024172	120025315	18.99
chr1	120072582	120074560	27.46
chr1	120120507	120121715	19.11
chr1	120175780	120177142	71.31
chr1	120339929	120341855	36.45
chr1	120371965	120373158	20.1
chr1	120601758	120604164	27.59
chr1	120682054	120683260	16.79
chr1	120727375	120728331	10.54
chr1	120739143	120740358	33.3
chr1	120740596	120742143	7.41
chr1	120769267	120770866	22.2
chr1	120812273	120813116	19.56
chr1	120858724	120860332	50.17
chr1	120910335	120911485	24.04
chr1	121004725	121006024	28.49
chr1	121176985	121178446	10.61
chr1	121327215	121328513	29.57
chr1	121371146	121372235	16.38
chr1	121394234	121395523	23.48
chr1	121400068	121400836	10.2
chr1	121430727	121432289	11.99
chr1	121701543	121702995	12.03
chr1	121770325	121772189	82.45
chr1	122333125	122333976	15.22
chr1	122501275	122502450	22.18
chr1	123220101	123221404	25.95
chr1	123841041	123842210	47.16
chr1	124044931	124046575	15.42
chr1	124796143	124797310	17.71
chr1	124957042	124957782	24.28
chr1	125123678	125124718	10.6
chr1	125434547	125436340	37.8
chr1	125559938	125561962	141.6
chr1	125711588	125712608	10.85
chr1	125909896	125913188	15.14
chr1	126431155	126432256	12.15
chr1	126511405	126512869	115.88
chr1	126597141	126598142	14.82
chr1	126600275	126601613	25.04
chr1	126616710	126617677	16.52
chr1	126702584	126703735	14.87
chr1	126725982	126727007	11.35
chr1	126737687	126738798	15.72
chr1	126744196	126745685	43.78
chr1	126971644	126972681	12.34
chr1	127039846	127040927	15.93
chr1	127045791	127046798	17.14
chr1	127204594	127206814	11.69
chr1	127400430	127401469	14.67
chr1	127442501	127443682	22.24
chr1	127444703	127445752	15.22
chr1	127463866	127464613	16.85
chr1	127530752	127532225	64.4
chr1	127535111	127536350	17.12
chr1	127555976	127557092	9.55
chr1	127677023	127678494	21.32
chr1	127773331	127774934	71.18
chr1	127868150	127869815	88.82
chr1	128102337	128104333	148.72
chr1	128243610	128245494	31.47
chr1	128358703	128360241	10.49
chr1	128416279	128417856	13.28
chr1	128444276	128445207	6.57
chr1	128471682	128473091	8.7
chr1	128532343	128533349	29.44
chr1	128572435	128573175	10.61
chr1	128592002	128593753	22.61
chr1	128639385	128640547	13.81
chr1	128642612	128644225	72.69
chr1	128658281	128659458	10.71
chr1	128686904	128687906	24.79
chr1	128710899	128711924	8.02
chr1	128806667	128807676	10.97
chr1	129586345	129587272	10.35
chr1	129662832	129663950	14.15
chr1	129675625	129676656	34.37
chr1	129694955	129696392	47.86
chr1	129837173	129838412	11.39
chr1	130299754	130300938	21.12
chr1	130462028	130463245	20.32
chr1	130467149	130468140	12.98
chr1	130715112	130718191	58.76
chr1	130840355	130841894	30.02
chr1	130936124	130937453	10.91
chr1	131003383	131004828	18.57
chr1	131030773	131031939	17.26
chr1	131070113	131071296	16.69
chr1	131083227	131084353	19.67
chr1	131096341	131098317	16.14
chr1	131137307	131139172	118.09
chr1	131452975	131454168	20.51
chr1	131524945	131528683	310
chr1	131657837	131658698	16.85
chr1	131827114	131828908	310
chr1	131909787	131911457	89.37
chr1	131962464	131964067	19.76
chr1	131970253	131973204	116.5
chr1	132007021	132008840	27.76
chr1	132157088	132158256	13.86
chr1	132164205	132165599	11.02
chr1	132189681	132192065	16.23
chr1	132290971	132293422	15.09
chr1	132298151	132299840	27.05
chr1	132304201	132305520	31.5
chr1	132308786	132310411	24.67
chr1	132333120	132334859	34.23
chr1	132389954	132392311	14.67
chr1	132416976	132418397	68.5
chr1	132557770	132559714	10.35
chr1	132626087	132627146	16.67
chr1	132687684	132688832	20.16
chr1	132765106	132766782	24.84
chr1	132770908	132771992	21.84
chr1	132853025	132854121	13.88
chr1	132879429	132882221	28.77
chr1	132917092	132918852	14.24
chr1	132927951	132929240	21.42
chr1	132945386	132946642	9.66
chr1	133024775	133025849	11.34
chr1	133045385	133047103	33.34
chr1	133130322	133132068	20.83
chr1	133145633	133146713	20.11
chr1	133180746	133183717	47.5
chr1	133192955	133194119	12.88
chr1	133214621	133215932	8.68
chr1	133218559	133219903	14.86
chr1	133236501	133238459	8.99
chr1	133250504	133252500	23.72
chr1	133362906	133364903	47.45
chr1	133366609	133368319	7.53
chr1	133397182	133398459	10.37
chr1	133407982	133410219	139.49
chr1	133422296	133425069	43.46
chr1	133525208	133526619	58.87
chr1	133609406	133610848	16.61
chr1	133648536	133649393	17.16
chr1	133660586	133661967	11.57
chr1	133844402	133845501	6.95
chr1	133883833	133885639	51.22
chr1	133907595	133909174	22.92
chr1	134060248	134061845	17.46
chr1	134062520	134064117	22.61
chr1	134078449	134079961	44.17
chr1	134092381	134093864	34.31
chr1	134098155	134100196	31.13
chr1	134320397	134321741	10.1
chr1	134343647	134345261	18.65
chr1	134405432	134406605	10.07
chr1	134414761	134416323	180.81
chr1	134494050	134495391	37.56
chr1	134555433	134557695	35.53
chr1	134559483	134562211	33.35
chr1	134791445	134792269	11.81
chr1	134954904	134956463	26.6
chr1	134962100	134962902	44.98
chr1	135069329	135070324	11.64
chr1	135104646	135105904	12.04
chr1	135146230	135148054	14.02
chr1	135198983	135199995	10.5
chr1	135282996	135284611	13.44
chr1	135313170	135314506	9.61
chr1	135323315	135325562	35.67
chr1	135374020	135375977	19.53
chr1	135429738	135431108	22.85
chr1	135490266	135491483	12.67
chr1	135523402	135525129	8.84
chr1	135582782	135586285	20.44
chr1	135595413	135596688	22.76
chr1	135602846	135604002	11.79
chr1	135619611	135620716	13.33
chr1	135658963	135660639	14.11
chr1	135687450	135688958	24.07
chr1	135698051	135699956	11.2
chr1	135728635	135729955	28.96
chr1	135739090	135740261	16.39
chr1	135740631	135741743	15.83
chr1	135765423	135767300	13.72
chr1	135788323	135789428	13.44
chr1	135799957	135801351	30.44
chr1	135918427	135919828	12.62
chr1	136007347	136008689	23.38
chr1	136017145	136019137	120.7
chr1	136050337	136052317	16.76
chr1	136130764	136132356	66.87
chr1	136136147	136138253	27.97
chr1	136233282	136234985	20.07
chr1	136259010	136261284	24.86
chr1	136345042	136347329	87.37
chr1	136414732	136415990	28.81
chr1	136465661	136466964	17.82
chr1	136511924	136513116	16.64
chr1	136518256	136519798	112.37
chr1	136576138	136577125	12
chr1	136577374	136578785	51.05
chr1	136587437	136589410	21.5
chr1	136624081	136626081	310
chr1	136653863	136655160	24.93
chr1	136714665	136715766	62.74
chr1	136725040	136726115	24.85
chr1	136775809	136778211	74.1
chr1	136781902	136782941	14.19
chr1	136895994	136897035	54.07
chr1	136911780	136912844	17.47
chr1	137008375	137010261	14.26
chr1	137221220	137222295	16.11
chr1	137254768	137255900	32.5
chr1	137354027	137355201	13.96
chr1	137375992	137377392	36.99
chr1	137478121	137479135	12.71
chr1	137571730	137572741	18.4
chr1	137639931	137641529	10.68
chr1	137899757	137900798	11.7
chr1	137927476	137928673	44.1
chr1	137952496	137953467	10.89
chr1	138021808	138024275	55.01
chr1	138247491	138248378	13.96
chr1	138344661	138345549	13.31
chr1	138384652	138386636	165.02
chr1	138499767	138500692	15.92
chr1	138523655	138524451	10.39
chr1	138617422	138620322	310
chr1	138624952	138625785	12.92
chr1	138718918	138720181	37.96
chr1	138730578	138731864	26.28
chr1	138736002	138737202	41.22
chr1	138762637	138763529	18.57
chr1	138847107	138849364	43.72
chr1	138856610	138857229	11.61
chr1	138912151	138913513	41
chr1	139048529	139049493	15.27
chr1	139092200	139093591	31.27
chr1	139193577	139194844	55.12
chr1	139207221	139208888	70.68
chr1	139234683	139235830	20.36
chr1	139319417	139320479	39.65
chr1	139375631	139376664	7.87
chr1	139421632	139423084	23.07
chr1	140253602	140254806	20.32
chr1	140305903	140307040	16.3
chr1	140409188	140410278	19.67
chr1	140451465	140452693	20.57
chr1	141322758	141323606	13.32
chr1	142170419	142171939	22.82
chr1	142601106	142602098	10.09
chr1	143071618	143072674	26.74
chr1	143504477	143505466	13.62
chr1	143739016	143740419	30.71
chr1	143776335	143778125	90.51
chr1	143910128	143911140	12.68
chr1	143989608	143990949	24.56
chr1	144003710	144004864	22.45
chr1	144695277	144696442	30.28
chr1	146359491	146360358	25.82
chr1	146497471	146499449	12.02
chr1	146983418	146984284	20.53
chr1	148960775	148961674	16.38
chr1	148965016	148966102	53.39
chr1	150392104	150394138	73.24
chr1	150480095	150481105	54.08
chr1	150593226	150594482	41.34
chr1	150610458	150611390	11.44
chr1	150681250	150682922	53.74
chr1	150706344	150707333	18.8
chr1	150804285	150805398	17.96
chr1	150814003	150815682	101.52
chr1	150824065	150825006	11.32
chr1	150828701	150829690	16.14
chr1	150951495	150952361	12.4
chr1	150994198	150995457	31.91
chr1	151040654	151041801	8.73
chr1	151045013	151046131	17.75
chr1	151062057	151063976	42.64
chr1	151102788	151103672	7.52
chr1	151343836	151345935	310
chr1	151427827	151429462	11.46
chr1	151499725	151501571	32.87
chr1	151629480	151630802	112.57
chr1	151631539	151632561	14.54
chr1	151727475	151728434	14.08
chr1	151754640	151756407	26.76
chr1	152009361	152010581	21.83
chr1	152018727	152019917	58.87
chr1	152042117	152042893	11.71
chr1	152046780	152048675	76.85
chr1	152088741	152091673	58.22
chr1	152386000	152387122	14.26
chr1	152399637	152400756	16.01
chr1	152417258	152418477	12.77
chr1	152421956	152423260	19.95
chr1	152427960	152428864	11.84
chr1	152550110	152551289	18.08
chr1	152587336	152588245	11.73
chr1	152624421	152625744	24.32
chr1	152680712	152683407	21.9
chr1	152686806	152688823	54.3
chr1	152702635	152703799	17.05
chr1	152765663	152767458	50.22
chr1	152790096	152791969	6.98
chr1	152901631	152904219	71.14
chr1	152972595	152973728	19.99
chr1	153015956	153017211	20.77
chr1	153031115	153032651	13.01
chr1	153035343	153036599	17.77
chr1	153053400	153055125	29.6
chr1	153090527	153092511	21.52
chr1	153132937	153134916	43.42
chr1	153140428	153141514	25.17
chr1	153202908	153203700	10.85
chr1	153284943	153285848	10.07
chr1	153291153	153292208	18.29
chr1	153292559	153293912	43.07
chr1	153320499	153321687	16.58
chr1	153331563	153333951	49.2
chr1	153424595	153426002	35.35
chr1	153486634	153488121	29.29
chr1	153652486	153654261	33.81
chr1	153664674	153666825	10.83
chr1	153771723	153772507	17.36
chr1	153888972	153889876	7.75
chr1	153899175	153901918	109.41
chr1	154113276	154114003	10.81
chr1	154555494	154556432	12.42
chr1	154705697	154706970	21.88
chr1	155077086	155078567	40.21
chr1	155082507	155084302	36.01
chr1	155097998	155100304	15.86
chr1	155158098	155159678	34.48
chr1	155243700	155245375	10.13
chr1	155414998	155416154	42.66
chr1	155416541	155418052	47.29
chr1	155485849	155486887	10.07
chr1	155527161	155528638	16.03
chr1	155557682	155558935	21.87
chr1	155576119	155577136	12.61
chr1	155604378	155605371	18.05
chr1	155646163	155647293	19.63
chr1	155680436	155682025	13.17
chr1	155682130	155682956	16.89
chr1	155740837	155743400	35.75
chr1	155812034	155813594	12.41
chr1	155972285	155974165	66.08
chr1	156035219	156036955	56.66
chr1	156089680	156090785	12.18
chr1	156108072	156109329	19.66
chr1	156182770	156185022	91.74
chr1	156192929	156194023	26.64
chr1	156230370	156231326	19.12
chr1	156473546	156474819	33.76
chr1	156558072	156559913	27.04
chr1	156613628	156615266	53.66
chr1	156718085	156719641	25.74
chr1	156751493	156753781	95.66
chr1	156778614	156782946	109.96
chr1	156800986	156802015	18.75
chr1	156825567	156826636	11.09
chr1	156838365	156839350	7.23
chr1	156852193	156853154	20.03
chr1	156860972	156862059	11.67
chr1	156938539	156940533	25.57
chr1	157143025	157144085	16.9
chr1	157256200	157257089	13.29
chr1	157411311	157412959	25.12
chr1	157439946	157441104	27.51
chr1	157458021	157459342	10.53
chr1	157801277	157802383	11.02
chr1	157897512	157898609	37.93
chr1	157912042	157913079	12.92
chr1	158192774	158193735	25.12
chr1	158381675	158383037	44.19
chr1	158521162	158522375	41.69
chr1	158713209	158714210	19.94
chr1	159135115	159135959	24.04
chr1	159231656	159232509	13.25
chr1	159388062	159389345	15.52
chr1	159392725	159393835	11.82
chr1	159534848	159535781	12.2
chr1	159556634	159557501	11.77
chr1	159686221	159687408	29.41
chr1	159818946	159819871	12.74
chr1	159822152	159823288	42.07
chr1	159924300	159925401	12.27
chr1	160080867	160081821	16.2
chr1	160194532	160195938	32.02
chr1	160212068	160213708	39.14
chr1	160223898	160224895	17.98
chr1	160269106	160270268	23.8
chr1	160351421	160352700	44.33
chr1	160649128	160650624	14.9
chr1	160655875	160656997	19.55
chr1	160743173	160744001	21.36
chr1	160791914	160793582	13.86
chr1	160905675	160907526	58.04
chr1	161033899	161035673	111.17
chr1	161070257	161071418	10.03
chr1	161130762	161131823	21.91
chr1	161170358	161171552	15.99
chr1	161195341	161196639	92.97
chr1	161250441	161251651	13.18
chr1	161359171	161359982	14.66
chr1	161402322	161403357	10.66
chr1	161717916	161718844	10.34
chr1	161875858	161877663	51.24
chr1	161968369	161969782	20.18
chr1	161983117	161985576	168.83
chr1	161990032	161991652	41.02
chr1	162008595	162010165	32.04
chr1	162016508	162018968	139.6
chr1	162019859	162021480	79.33
chr1	162037653	162039109	56.15
chr1	162040501	162041536	13.55
chr1	162044026	162045543	21.61
chr1	162074781	162077546	62.13
chr1	162083000	162084088	20.54
chr1	162093862	162094908	12.4
chr1	162121549	162122815	26.68
chr1	162186361	162187911	34.45
chr1	162202190	162203177	14.27
chr1	162206679	162208222	41.27
chr1	162215558	162218260	93.36
chr1	162242695	162244419	69.35
chr1	162253692	162255725	171.42
chr1	162281595	162283325	109.29
chr1	162313289	162314388	16.86
chr1	162345899	162347429	147.63
chr1	162476706	162478553	43.81
chr1	162531926	162532875	19.35
chr1	162569597	162571566	54.58
chr1	162869774	162870899	17.12
chr1	162943100	162944364	11.13
chr1	162946482	162947853	24.46
chr1	163135492	163136829	60.19
chr1	163151651	163153218	29.91
chr1	163159595	163160758	91.02
chr1	163176639	163177995	83.65
chr1	163185481	163186775	22.79
chr1	163238595	163239699	21.45
chr1	163289110	163290293	28.39
chr1	163307511	163310151	12.24
chr1	163311542	163315564	18.57
chr1	163356019	163357201	15.02
chr1	163357503	163358849	52.09
chr1	163360388	163361498	24.13
chr1	163373769	163375274	41.57
chr1	163377596	163378674	18.55
chr1	163403175	163404217	10.39
chr1	163442967	163445118	47.18
chr1	163460880	163462005	71.73
chr1	163534588	163535659	12.45
chr1	163574423	163575502	15.32
chr1	163617637	163618952	38.24
chr1	163650819	163651818	12.87
chr1	163670267	163671525	53.88
chr1	163682634	163683820	20.64
chr1	163707909	163709187	32.24
chr1	163778953	163780526	52.15
chr1	163843572	163844768	66.05
chr1	163845488	163846643	23.24
chr1	163852704	163854829	55.1
chr1	163874052	163874921	136.58
chr1	163893277	163894483	29.37
chr1	163897742	163899100	74.98
chr1	163905222	163906336	13.61
chr1	163906969	163909085	89.64
chr1	163929303	163930773	18.02
chr1	164135717	164136881	21.81
chr1	164248228	164249970	30.48
chr1	164275268	164276221	7.8
chr1	164306776	164308073	12.45
chr1	164433636	164434698	28.78
chr1	164457513	164459283	14.54
chr1	164793838	164794534	10.67
chr1	164898535	164899794	17.39
chr1	164908102	164908965	12.45
chr1	165046164	165047492	46.03
chr1	165193548	165194832	14.7
chr1	165207504	165208485	11.94
chr1	165236019	165237718	106.5
chr1	165281296	165283133	22.11
chr1	165327393	165328473	18.43
chr1	165459106	165461987	82.71
chr1	165594459	165595542	13.86
chr1	165633308	165635399	69.87
chr1	165692404	165694777	10.19
chr1	165700634	165703426	28.77
chr1	165707446	165708794	14.62
chr1	165747632	165748797	46.93
chr1	165754570	165756114	42.62
chr1	165805690	165807321	56.12
chr1	165832868	165835273	60.26
chr1	165835839	165837399	52.29
chr1	165844321	165846177	13.97
chr1	165999409	166004031	220.73
chr1	166023767	166024756	11.83
chr1	166045260	166046402	12.9
chr1	166047219	166049995	13.72
chr1	166053061	166054222	9.82
chr1	166117454	166118573	34.65
chr1	166130086	166131808	7.73
chr1	166231327	166232436	43.83
chr1	166282292	166283478	14.62
chr1	166308476	166310014	30.77
chr1	166317031	166318193	11.29
chr1	166349012	166350494	41.95
chr1	166378342	166380717	54.45
chr1	166408946	166410399	11.08
chr1	166947674	166948861	27.44
chr1	167000390	167003016	15.49
chr1	167011096	167012103	14.97
chr1	167024732	167025519	12.14
chr1	167082350	167083284	7.06
chr1	167283615	167285700	52.06
chr1	167307943	167309350	27.45
chr1	167393346	167394559	14.34
chr1	167498771	167499907	13.61
chr1	167549064	167550254	9.36
chr1	167597944	167599133	61.35
chr1	167644630	167645614	17.02
chr1	167733025	167735228	19.63
chr1	167754228	167755759	33.42
chr1	167888131	167889474	14.51
chr1	167929297	167930448	65.58
chr1	168138349	168139906	53.44
chr1	168158162	168159190	194.31
chr1	168163182	168164118	17.75
chr1	168183001	168184033	16.91
chr1	168190800	168191919	30.59
chr1	168195245	168196344	37.93
chr1	168229744	168231078	34.35
chr1	168241135	168242186	15.95
chr1	168357060	168358558	16.27
chr1	168379794	168380839	14.01
chr1	168380886	168383490	14.21
chr1	168384973	168386226	10.19
chr1	168392001	168392882	23.93
chr1	168402057	168404652	60.26
chr1	168405365	168406687	51.62
chr1	168409622	168410848	52.2
chr1	168426602	168428790	28.02
chr1	168430991	168433267	309.33
chr1	168708184	168709946	43.34
chr1	168753583	168754875	16.43
chr1	168761218	168762351	23.67
chr1	168786326	168787581	15.96
chr1	168911092	168912101	12.72
chr1	168969047	168970146	17.54
chr1	169051072	169052254	59
chr1	169052912	169053704	14.27
chr1	169075390	169076554	15.62
chr1	169078692	169079742	15.79
chr1	169155078	169156303	38.93
chr1	169159601	169161741	71.22
chr1	169163213	169164306	13.91
chr1	169165868	169166883	12.64
chr1	169234856	169235907	9.29
chr1	169236857	169239591	161.51
chr1	169246338	169247864	27.95
chr1	169259675	169260523	12.68
chr1	169263792	169265181	17.43
chr1	169268097	169269092	15.4
chr1	169353649	169354709	18.87
chr1	169367041	169368881	17.14
chr1	169382128	169383049	15.99
chr1	169385275	169386423	10.92
chr1	169458508	169459825	27.02
chr1	169578079	169579136	23.78
chr1	169747122	169748143	15.34
chr1	169968536	169970085	29.14
chr1	170174012	170175729	231.67
chr1	170401616	170402772	24.88
chr1	170438399	170439622	18.31
chr1	170484701	170485676	7.03
chr1	170497502	170500474	27.22
chr1	170575534	170576594	14.39
chr1	170588817	170590464	36.97
chr1	170643950	170645140	20.84
chr1	170867062	170868779	30.56
chr1	170884815	170885870	25.09
chr1	170907206	170908923	14.68
chr1	171101986	171103061	13.42
chr1	171150030	171151109	14.42
chr1	171195531	171196905	92.04
chr1	171221594	171223193	81.41
chr1	171249815	171253175	22.55
chr1	171269823	171271438	17.21
chr1	171328288	171330514	57.87
chr1	171345257	171346218	13.81
chr1	171410828	171412638	25.03
chr1	171435099	171436091	14.51
chr1	171437071	171438306	14.96
chr1	171502645	171504477	43.96
chr1	171715976	171716954	21.1
chr1	172026373	172028064	35.57
chr1	172063169	172065203	16.96
chr1	172082163	172083348	16.24
chr1	172147256	172148785	48.57
chr1	172205866	172207331	21.86
chr1	172221414	172222697	10.04
chr1	172311341	172313127	29.28
chr1	172325085	172326961	14.05
chr1	172349523	172351108	10.72
chr1	172375800	172377455	56.86
chr1	172481090	172483843	36.27
chr1	172499758	172502293	10.12
chr1	172561574	172563954	16.35
chr1	172631992	172633587	51.41
chr1	172704429	172705402	22.64
chr1	173361398	173362251	14.53
chr1	173461523	173462471	29.81
chr1	173821420	173822203	17.92
chr1	173955029	173956095	14.3
chr1	174501431	174504069	31.42
chr1	174742424	174743558	31
chr1	174765502	174766571	11.91
chr1	174921163	174922261	11.46
chr1	175027879	175029524	43.93
chr1	175034844	175036388	45.89
chr1	175491659	175493270	27.06
chr1	175529503	175530517	17.68
chr1	175624832	175626273	19.92
chr1	175691783	175693425	14.26
chr1	176274266	176275933	12.97
chr1	176812946	176815404	63.55
chr1	176998570	176999839	45.62
chr1	177150092	177151431	27.35
chr1	177257076	177259540	46.41
chr1	177441214	177443973	310
chr1	177517720	177519973	34.08
chr1	177795638	177797262	46.38
chr1	177982649	177983910	54.83
chr1	178186997	178188163	69.87
chr1	178274821	178276941	41.85
chr1	178317703	178319665	79.77
chr1	178336136	178338453	50.69
chr1	178368534	178369798	19.16
chr1	178405103	178407081	59.31
chr1	178504524	178505577	13.87
chr1	178527116	178533295	110.38
chr1	178542329	178544308	60.74
chr1	178565967	178567517	23.6
chr1	178585140	178586570	12.87
chr1	178590080	178591518	41.27
chr1	178639522	178641796	30.47
chr1	178642700	178644030	10.89
chr1	178660947	178662277	138.64
chr1	178676688	178677910	30.91
chr1	178707614	178708926	41.41
chr1	178727851	178729405	48.25
chr1	178770135	178771403	14.58
chr1	178919412	178921080	111.69
chr1	178952629	178953800	17.15
chr1	178961431	178962869	38.26
chr1	178978084	178979667	36.83
chr1	179059738	179061293	89.12
chr1	179061378	179062517	12.85
chr1	179120013	179121609	58.89
chr1	179142608	179144731	38.92
chr1	179177536	179178543	16.49
chr1	179182274	179183851	27.7
chr1	179196517	179198633	65.36
chr1	179205390	179206758	35.1
chr1	179206891	179208151	26.21
chr1	179217369	179218712	30.83
chr1	179238234	179239476	75.25
chr1	179309043	179310242	69.76
chr1	179429084	179430103	15.93
chr1	179436257	179437133	10.56
chr1	179457764	179459360	30.89
chr1	179460589	179461968	10.95
chr1	179473478	179475456	310
chr1	179476594	179477537	12.61
chr1	179545945	179547336	70.24
chr1	179573793	179574833	10.91
chr1	179585825	179587161	36.64
chr1	179667478	179668995	49.66
chr1	179802488	179804348	19.91
chr1	179865994	179867182	14.96
chr1	179958189	179960757	10.3
chr1	179961002	179962836	20.06
chr1	180194920	180196889	41.5
chr1	180255617	180256901	21.35
chr1	180330134	180333778	12.62
chr1	180387021	180388130	27.06
chr1	180482629	180484011	17.14
chr1	180547188	180548592	34.62
chr1	180568345	180569653	48.16
chr1	180640212	180642211	20.08
chr1	180696243	180697856	13.08
chr1	180725343	180726868	27.41
chr1	180812290	180814807	52.16
chr1	180837728	180838855	9.67
chr1	180850054	180851729	47.96
chr1	180941970	180943262	22.16
chr1	181000060	181001634	25.57
chr1	181016488	181018058	12.39
chr1	181150466	181151571	13.56
chr1	181210386	181212984	73.44
chr1	181255261	181257465	24.81
chr1	181272113	181273562	13.77
chr1	181560596	181562504	20.27
chr1	181615790	181616798	19.8
chr1	181841373	181843284	110.65
chr1	182018737	182021010	16.91
chr1	182052601	182053775	14.28
chr1	182081601	182082849	31.88
chr1	182124058	182125711	26.74
chr1	182137073	182138749	29.75
chr1	182280707	182283189	23.22
chr1	182340518	182342265	41.46
chr1	182408266	182410025	23.93
chr1	182516586	182518084	26.31
chr1	182763266	182765437	20.37
chr1	182861311	182862653	24.95
chr1	182907986	182909293	35.54
chr1	182982185	182983828	11.36
chr1	183120200	183121272	25.09
chr1	183123367	183124286	10.45
chr1	183146137	183148373	226.91
chr1	183149241	183151228	19.56
chr1	183163584	183165122	10.17
chr1	183180814	183182081	27.95
chr1	183183093	183184312	34.33
chr1	183187783	183190752	120.56
chr1	183220783	183222158	40.25
chr1	183344712	183346056	14.35
chr1	183368449	183370363	61.82
chr1	183388334	183389516	11.32
chr1	183548485	183549799	12.8
chr1	183772233	183773351	24.68
chr1	183938136	183939288	29.82
chr1	184003993	184005015	11.71
chr1	184033081	184035229	298.35
chr1	184056750	184057773	16.79
chr1	184096491	184097474	17.56
chr1	184378719	184380490	19.18
chr1	184383794	184384886	17.66
chr1	184398458	184399463	11.61
chr1	184412267	184413446	17.93
chr1	184470861	184472045	23.85
chr1	184481731	184482823	10.27
chr1	184539008	184540498	26.58
chr1	184547331	184548674	21.95
chr1	184621664	184622811	26.24
chr1	184644659	184645880	12.58
chr1	184663243	184664142	16.72
chr1	184671975	184673383	18.09
chr1	184687317	184689697	176.98
chr1	184692096	184693083	16.17
chr1	184716227	184717906	15.79
chr1	184731229	184733848	22.01
chr1	184781230	184782931	33.84
chr1	184792833	184794252	63.36
chr1	184845033	184846527	33.65
chr1	185032006	185033302	34.77
chr1	185203485	185204968	88.66
chr1	185216073	185217341	24.84
chr1	185331742	185332691	16.25
chr1	185362413	185364141	45.49
chr1	185454356	185456059	41.97
chr1	185730735	185732079	130.07
chr1	185817104	185819958	111.88
chr1	185833922	185835020	29.55
chr1	185851449	185852403	10.57
chr1	186145143	186146097	11.72
chr1	186163098	186164393	22.2
chr1	186182245	186183417	36.74
chr1	186222955	186224233	44.34
chr1	186267003	186268252	49.88
chr1	186434463	186436155	50.63
chr1	186478308	186479448	23.51
chr1	186481694	186483266	49.39
chr1	186554374	186555280	8.64
chr1	186842337	186843321	12.91
chr1	186897817	186898723	10.63
chr1	186987900	186989026	15.99
chr1	187071669	187072922	39.01
chr1	187137219	187138271	33.82
chr1	187277082	187278315	17.04
chr1	187278568	187279951	38.42
chr1	187402862	187403847	10.17
chr1	187413619	187414988	13.68
chr1	187417765	187419082	30.31
chr1	187554584	187555779	24.56
chr1	187603699	187604521	20.7
chr1	187627093	187628086	19.41
chr1	187651116	187653109	17.95
chr1	187806844	187808428	13.87
chr1	187853718	187855014	104.4
chr1	187964415	187965438	14.33
chr1	187997193	187998538	21.83
chr1	188007023	188008041	10.87
chr1	188029448	188030758	17.98
chr1	188051965	188052904	10.04
chr1	188079388	188081228	19.65
chr1	188082563	188084018	79
chr1	188149150	188150203	22.44
chr1	188184653	188186219	26.97
chr1	188198460	188199505	13.4
chr1	188207120	188207995	16.14
chr1	188267052	188268015	11.6
chr1	188385575	188386498	14.02
chr1	188387569	188388674	15.56
chr1	188456623	188458097	114.45
chr1	188552199	188553588	28.24
chr1	188805502	188806861	122.31
chr1	188892841	188894274	60.77
chr1	189049657	189051420	103.76
chr1	189105060	189105869	19.55
chr1	189301465	189302472	8.57
chr1	189342910	189344372	15.03
chr1	189402515	189404276	24.3
chr1	189430183	189431261	11.92
chr1	189516559	189517546	29.11
chr1	189623176	189625476	161.86
chr1	189627862	189628940	14.99
chr1	189687509	189688751	26.91
chr1	189705770	189708110	47.81
chr1	189745337	189746319	13.84
chr1	189756498	189757871	12.32
chr1	189920501	189923387	39.95
chr1	189988961	189991724	45.61
chr1	190017206	190018765	30.01
chr1	190147535	190150043	60.48
chr1	190154166	190155626	13.14
chr1	190168389	190171363	30.17
chr1	190174534	190175998	10.38
chr1	190525243	190527504	91.43
chr1	190588897	190590336	25.17
chr1	190927959	190929582	39
chr1	190977579	190980012	40.85
chr1	191025053	191027005	20.26
chr1	191053150	191054186	19.83
chr1	191062406	191063597	22.51
chr1	191181980	191185452	23.13
chr1	191223766	191225676	51.29
chr1	191267448	191268936	27.73
chr1	191312158	191313474	77.08
chr1	191317278	191318678	11.3
chr1	191325484	191326834	32.52
chr1	191395746	191398323	310
chr1	191461539	191462962	14.04
chr1	191574861	191576402	30.18
chr1	191624772	191626022	11.77
chr1	191697986	191699119	10.3
chr1	191717572	191719512	35.94
chr1	191748105	191749268	25.2
chr1	191820845	191822409	17.9
chr1	191905688	191908045	74.63
chr1	191989618	191990884	65.24
chr1	192091871	192093436	20.78
chr1	192136152	192138921	113.97
chr1	192365833	192367039	7.24
chr1	192735554	192737162	11.12
chr1	192769943	192771454	19.05
chr1	192775607	192776828	11.04
chr1	192789388	192790525	12.89
chr1	192795699	192797412	119.52
chr1	192798734	192800433	23.14
chr1	192833346	192835900	17.39
chr1	192849190	192850369	14.31
chr1	192853994	192857000	100.2
chr1	192861006	192862996	44.72
chr1	192898419	192899238	27.04
chr1	193035133	193036733	13.55
chr1	193129444	193130645	15.84
chr1	193172885	193174219	17.84
chr1	193189003	193190121	9.74
chr1	193225140	193226487	36.7
chr1	193227128	193229018	38.26
chr1	193252271	193253253	21.73
chr1	193272091	193273813	19.66
chr1	193305107	193306056	20.18
chr1	193382003	193383257	30.45
chr1	193385852	193386958	6.61
chr1	193418379	193419911	15.04
chr1	193449137	193450286	25.51
chr1	193537014	193537968	13.11
chr1	193550303	193551359	21.07
chr1	193557791	193558809	14.41
chr1	193624636	193626308	60.73
chr1	193672895	193673959	14.33
chr1	193698373	193699557	30.21
chr1	193971201	193972180	11.38
chr1	194148355	194149418	28.93
chr1	194197250	194198217	16.52
chr1	194222703	194223808	45.67
chr1	194310127	194311007	8.57
chr1	194353936	194355455	38.25
chr1	194434905	194435834	10.9
chr1	194609998	194611445	148.55
chr1	194618522	194621095	31.38
chr1	194631206	194632418	25.65
chr1	194635070	194636324	51.18
chr1	194637233	194638409	38.37
chr1	194677376	194678388	11.51
chr1	194678677	194681134	202.51
chr1	194711989	194713012	10.69
chr1	194714184	194715346	16.54
chr1	194719831	194721103	30.42
chr1	195040183	195041189	11.6
chr1	195241194	195242260	12.18
chr10	3739948	3741611	25.55
chr10	3793289	3794396	14.91
chr10	3817168	3817898	10.77
chr10	3827180	3828170	10.11
chr10	3829232	3830287	8.78
chr10	3839186	3840608	43.83
chr10	3891483	3892759	45.77
chr10	3972606	3974396	22.23
chr10	4025386	4026653	41.05
chr10	4107384	4108354	10.19
chr10	4116728	4117765	33.4
chr10	4132421	4133380	29.03
chr10	4332205	4333278	15.35
chr10	4386210	4388861	61.15
chr10	4473145	4474334	20.58
chr10	4551744	4554489	47.25
chr10	4712085	4714099	41.97
chr10	4899160	4899998	10.39
chr10	5096773	5097727	10.57
chr10	5119046	5120209	20.38
chr10	5139146	5139990	15.35
chr10	5194268	5195409	15.35
chr10	5550044	5551404	12.26
chr10	5804402	5806608	74.3
chr10	5823201	5824818	26.95
chr10	6539741	6540781	65.49
chr10	6562952	6563905	10.02
chr10	7117639	7118547	10.2
chr10	7392009	7393167	12.24
chr10	7589319	7590941	31.94
chr10	7662258	7663950	96.53
chr10	7667112	7668146	10.7
chr10	7680608	7682348	29.06
chr10	7779900	7781494	24.13
chr10	7954701	7957297	57.59
chr10	8021993	8022970	7.23
chr10	8041313	8042572	13.4
chr10	8070234	8071443	42.62
chr10	8133152	8134233	12.78
chr10	8182636	8184160	85.93
chr10	8184429	8185668	23.57
chr10	8212971	8214943	200.07
chr10	8218525	8219316	12.97
chr10	8223585	8224762	70.79
chr10	8447724	8448929	14.12
chr10	8517475	8519547	73.69
chr10	8785128	8786397	21.01
chr10	8813811	8814911	10.62
chr10	8825564	8826670	28.04
chr10	8830079	8831479	11.99
chr10	8853156	8854441	26.51
chr10	8885140	8887105	67.74
chr10	8909939	8910925	15.58
chr10	8955498	8956557	15.3
chr10	8960584	8961646	15.6
chr10	8967843	8969584	30.91
chr10	9029431	9030539	14.9
chr10	9119057	9119843	13.05
chr10	9210424	9211211	11.75
chr10	9521048	9521960	10.55
chr10	9557225	9558278	37.87
chr10	9610269	9611259	11.81
chr10	9626903	9627851	15.53
chr10	9630531	9631510	17.54
chr10	9674145	9676475	18.16
chr10	9696294	9697275	16.41
chr10	9899898	9902417	173.44
chr10	10300822	10301956	26.52
chr10	10471763	10472999	33.5
chr10	11148814	11150224	30.62
chr10	11279660	11282302	58.08
chr10	11342864	11344339	23.52
chr10	11362919	11363811	12.01
chr10	11739335	11740466	48.34
chr10	11751991	11753080	17.71
chr10	12529394	12530360	10.41
chr10	12544138	12545044	10.63
chr10	12548404	12549415	13.55
chr10	12552113	12553918	91.12
chr10	12554705	12555624	12.22
chr10	12591657	12592572	12.89
chr10	12612193	12613191	21.41
chr10	12614813	12616077	19.96
chr10	12729325	12730437	17.97
chr10	12730491	12731499	11.34
chr10	12866482	12869989	103.5
chr10	12878588	12880037	23.8
chr10	12922265	12923516	26.19
chr10	12963677	12965035	21.02
chr10	13007965	13009076	11.1
chr10	13090114	13091504	62.2
chr10	13106941	13110495	55.46
chr10	13118832	13120044	12.99
chr10	13169737	13172007	28.08
chr10	13192278	13193583	41.98
chr10	13209627	13210796	26.52
chr10	13232448	13234130	18.66
chr10	13323057	13324937	98.28
chr10	13346365	13347409	39.81
chr10	13375742	13377334	22.31
chr10	13473461	13475015	17.44
chr10	13500698	13501809	23.05
chr10	13552488	13553820	13.63
chr10	13564511	13565482	11.6
chr10	13652851	13653903	11
chr10	13666794	13668002	25.01
chr10	13705402	13706558	22.53
chr10	13707471	13708455	10.75
chr10	13713813	13715303	31.64
chr10	13763075	13763965	25.84
chr10	13868325	13869508	30.78
chr10	13916366	13917334	13.14
chr10	13964285	13968045	52.04
chr10	13982498	13984469	52.6
chr10	14017473	14018630	12.05
chr10	14050785	14051986	42.84
chr10	14055372	14056454	23.31
[truncated: 26,178 more rows]

## Sheet: Hand2
Chrom	Start	End	-log10(pvalue)
chr1	4430272	4431038	33.59
chr1	4571400	4572295	12.54
chr1	4672141	4672777	13.71
chr1	4785003	4785949	11.72
chr1	9380760	9381734	24.77
chr1	9565017	9565711	22.32
chr1	9583066	9584596	34.84
chr1	9755808	9756544	15.97
chr1	9859582	9860495	14.13
chr1	9988252	9989144	23.62
chr1	10348201	10349259	10.34
chr1	10841595	10842421	11.74
chr1	10990437	10991577	45.36
chr1	11016831	11017674	17.38
chr1	12066537	12067548	22.51
chr1	12435841	12436841	16.06
chr1	12576609	12577618	78.75
chr1	12644452	12645145	14.38
chr1	12857284	12858188	12.61
chr1	13214459	13215301	16.02
chr1	13329186	13330422	14.23
chr1	13372631	13373644	12.95
chr1	13770646	13771659	152.1
chr1	13860800	13862301	30.12
chr1	13911751	13912787	21.31
chr1	13935567	13936529	18.57
chr1	14145496	14146639	45.09
chr1	14511389	14512262	11.05
chr1	14608795	14609780	14.26
chr1	15033896	15034816	34.04
chr1	15358058	15358799	13.8
chr1	15451241	15452405	25.82
chr1	16126724	16128024	149.78
chr1	16130120	16131213	28.84
chr1	16138876	16139958	13.94
chr1	16229211	16230459	310
chr1	16231310	16232247	53.88
chr1	16248664	16249927	51.06
chr1	16293575	16294614	23.37
chr1	16398448	16399548	18.63
chr1	16656387	16657501	10.29
chr1	20466052	20467046	11.15
chr1	21486326	21487272	18.41
chr1	21773744	21774435	29.84
chr1	21883757	21884507	16.4
chr1	21960059	21961192	27.94
chr1	22252708	22253472	14.06
chr1	22261700	22262756	15.02
chr1	22292911	22294707	178.4
chr1	22533484	22534348	16.78
chr1	24005145	24006258	81.66
chr1	24195505	24196863	101.28
chr1	24667488	24668485	10.54
chr1	28420026	28420968	23.99
chr1	30414789	30415611	27.27
chr1	30714871	30715619	32.41
chr1	30805533	30806630	27.26
chr1	31058174	31059517	126.88
chr1	31072679	31073370	37.06
chr1	31153679	31154630	10.13
chr1	33464190	33464941	71.82
chr1	33472432	33473008	17.78
chr1	34096615	34097510	8.05
chr1	34106425	34107183	14.84
chr1	34127800	34128858	18.85
chr1	34235860	34236921	8.05
chr1	34387081	34387887	30.7
chr1	34783509	34784414	16.23
chr1	34842417	34843435	17.45
chr1	35953430	35954323	14.46
chr1	36273006	36274084	21.19
chr1	36368640	36369354	12.27
chr1	36723185	36724116	15.95
chr1	37121938	37122959	13.24
chr1	37124629	37125797	36.05
chr1	37220040	37220953	49.36
chr1	37221762	37222612	8.28
chr1	37408048	37409905	26.2
chr1	37583914	37584895	11.9
chr1	37697851	37698910	61.72
chr1	38103460	38104519	43.23
chr1	38241263	38242515	33.75
chr1	38436191	38437010	12.19
chr1	38438294	38439128	10.31
chr1	38467404	38468406	33.45
chr1	38511907	38512959	21.08
chr1	38545272	38546985	44.47
chr1	38549770	38551225	26.46
chr1	38554217	38555162	7.17
chr1	38631389	38632500	12.18
chr1	38757369	38758361	17.03
chr1	38759987	38761055	23.62
chr1	39046175	39047273	87.93
chr1	39244167	39244980	16.56
chr1	39511524	39512396	18.15
chr1	39555412	39556497	24.62
chr1	39564330	39565286	43.67
chr1	39740020	39741067	20.64
chr1	39867750	39869028	38.29
chr1	40243400	40244381	13.09
chr1	41058308	41059417	26.99
chr1	41264139	41264979	12.77
chr1	41579386	41580175	11.07
chr1	41651675	41653365	88.63
chr1	42233017	42233870	21.5
chr1	42953849	42954603	10.37
chr1	43203178	43204062	15.72
chr1	43445021	43446371	305.73
chr1	44591561	44592259	69.3
chr1	44618483	44619547	77.72
chr1	44678460	44679872	86.62
chr1	44747935	44748793	9.51
chr1	44781630	44782436	10.22
chr1	45020267	45020966	17.47
chr1	45316349	45317373	30.49
chr1	45501748	45502719	15.11
chr1	45675640	45676348	7.1
chr1	45760224	45761607	105.29
chr1	45905056	45906017	168.91
chr1	46494875	46495589	13.61
chr1	46887827	46888590	16.85
chr1	50636184	50636852	11.09
chr1	51333023	51333743	11.52
chr1	51508877	51509881	49.03
chr1	51580363	51581038	14.35
chr1	51650010	51651305	19.4
chr1	52232673	52233795	41.93
chr1	52308007	52308831	20.1
chr1	52397140	52398086	25.41
chr1	52652574	52653625	18.41
chr1	54702514	54704120	13.12
chr1	54793339	54794101	12.12
chr1	55087887	55088831	12.15
chr1	55130977	55131726	10.29
chr1	55193099	55193880	15.1
chr1	55432357	55433175	67.28
chr1	55433579	55434262	23.31
chr1	56348843	56349529	60.2
chr1	56965647	56966897	91.33
chr1	56971788	56972810	16.84
chr1	56982098	56982849	6.17
chr1	57095862	57096950	32.87
chr1	57227099	57228128	56.97
chr1	57440399	57441212	10.71
chr1	57863966	57864945	11.93
chr1	58341160	58342267	38.74
chr1	59269794	59271029	68.21
chr1	59303283	59304327	32.35
chr1	59309908	59310986	37.82
chr1	59315056	59316572	12.65
chr1	59320076	59321612	11.52
chr1	59321719	59323250	30.1
chr1	59331675	59332778	40.46
chr1	59334947	59335971	19.01
chr1	59368586	59369358	10.12
chr1	59409366	59410326	14.19
chr1	59437491	59438536	10.93
chr1	59451283	59452225	15.49
chr1	59480906	59482458	27.59
chr1	59519777	59521335	63.08
chr1	59609556	59610556	10.66
chr1	59887599	59888662	69.91
chr1	60342711	60343760	26.08
chr1	60408939	60409815	8.28
chr1	61151467	61152402	32.52
chr1	61233333	61234723	33.88
chr1	61297916	61298966	17.73
chr1	61406781	61407832	30.6
chr1	61529879	61530763	24.57
chr1	62018048	62018835	13.65
chr1	62137182	62138085	16.26
chr1	62197108	62197923	41.82
chr1	62259759	62260797	26.33
chr1	62325133	62325964	22.76
chr1	62374071	62375142	62.82
chr1	62382452	62383874	29.14
chr1	62579063	62580080	33.86
chr1	62664735	62665649	32.58
chr1	62726902	62727832	10.98
chr1	62779498	62780728	91.08
chr1	62860513	62861534	46.5
chr1	63113327	63114549	13.45
chr1	63204006	63205044	72.76
chr1	63552275	63553613	35.3
chr1	63562993	63564108	86.06
chr1	63677699	63678677	19.64
chr1	63711143	63711917	53.32
chr1	63808513	63809390	18.64
chr1	63994102	63994825	7.01
chr1	64164294	64165321	12.18
chr1	64311092	64312042	11.16
chr1	64791121	64792061	8
chr1	64878317	64879434	48.08
chr1	65650779	65651623	21.88
chr1	66331284	66332222	10.18
chr1	66812753	66813460	12.39
chr1	67465242	67466243	119.66
chr1	68787525	68788364	27.26
chr1	71475448	71476243	15.01
chr1	71556506	71557473	9.5
chr1	71650654	71651288	12.07
chr1	71836925	71838456	14.93
chr1	71849374	71850369	53.79
chr1	71944452	71945125	9.25
chr1	71980322	71981337	33.1
chr1	72002211	72003142	14.09
chr1	72020141	72021133	68.39
chr1	72243396	72244890	18.25
chr1	72870632	72871471	16.76
chr1	73030536	73031538	23.42
chr1	73045726	73046989	33.52
chr1	73069165	73069956	33.39
chr1	73071981	73072974	27.12
chr1	73362994	73364493	113.08
chr1	73365527	73366362	31.58
chr1	73398958	73399685	35.93
chr1	73437958	73439048	108.95
chr1	73702215	73703184	11.73
chr1	73758016	73759467	49.04
chr1	73764325	73765537	51.25
chr1	73948280	73949445	183.1
chr1	73972361	73973436	69.48
chr1	74000470	74001511	69.37
chr1	74030670	74031664	7.87
chr1	74041397	74042631	57.12
chr1	74083007	74083810	7.65
chr1	74091239	74092213	12.65
chr1	74127538	74128284	13.04
chr1	74179608	74180704	90.73
chr1	74240032	74240961	11.35
chr1	74274471	74275874	239.32
chr1	74361729	74362211	10.76
chr1	74391340	74392355	11.42
chr1	74587508	74588653	26.39
chr1	74712817	74713982	15.69
chr1	74715370	74715975	19.71
chr1	74797226	74798140	11.66
chr1	74807858	74808701	9.14
chr1	74898333	74899254	17.84
chr1	75359694	75360630	19.88
chr1	75399361	75400456	25.2
chr1	75478928	75479987	13.23
chr1	75505406	75506887	9.18
chr1	75645667	75646743	18.63
chr1	75662208	75663435	89.54
chr1	75691919	75692797	34.45
chr1	75693260	75694076	11.89
chr1	75748415	75749431	10.04
chr1	75772622	75773605	14.8
chr1	75803611	75804385	13.88
chr1	75844080	75845478	123.76
chr1	75915763	75916913	19.23
chr1	76009313	76010460	77.98
chr1	76031360	76032512	19.87
chr1	76065576	76066610	22.76
chr1	76079955	76081007	75.04
chr1	76490936	76491929	7.43
chr1	76865906	76866996	98.85
chr1	76974795	76976640	210.45
chr1	77047096	77047909	40.06
chr1	77101625	77102681	12.53
chr1	77131705	77132600	29.01
chr1	77140896	77141447	12.32
chr1	77289222	77290217	10.75
chr1	77307631	77308665	13
chr1	77336744	77337509	22.67
chr1	77338045	77339057	132.91
chr1	77404345	77405301	14.08
chr1	77457681	77458453	13.91
chr1	78021405	78022459	20.5
chr1	78110071	78111042	11.45
chr1	78311236	78312239	20.92
chr1	78428239	78429258	11.2
chr1	78588389	78589336	49.05
chr1	78657438	78658415	8.52
chr1	79183539	79184308	8.4
chr1	79859831	79861154	129.62
chr1	80293897	80294562	22.98
chr1	81125110	81125935	11.75
chr1	81303136	81303929	12.26
chr1	81358536	81359503	111.75
chr1	81360020	81360586	12.27
chr1	81488511	81489481	12.05
chr1	81577597	81578250	11.35
chr1	81608777	81609440	16.04
chr1	81795291	81796211	21.52
chr1	81916320	81917480	38.02
chr1	82112129	82113335	53.05
chr1	82135673	82136672	91.89
chr1	82185771	82186661	13.24
chr1	82202551	82203616	86.4
chr1	82257109	82258800	78.58
chr1	82433006	82433882	20.69
chr1	83034680	83035931	84.72
chr1	83218032	83219056	10.76
chr1	83350782	83351543	15.22
chr1	83870504	83871910	35.26
chr1	83889482	83890193	15.76
chr1	83896559	83897536	17.73
chr1	85894565	85895626	22.54
chr1	86433939	86435021	12.28
chr1	86442201	86443029	10.82
chr1	86503030	86504799	32.08
chr1	86525484	86526451	19.3
chr1	87755640	87756358	21.97
chr1	88069803	88070644	10.91
chr1	88401224	88401920	19.04
chr1	88428571	88429981	21.99
chr1	88612808	88613852	13.22
chr1	88615862	88616690	16.28
chr1	88821114	88822106	10.61
chr1	89005219	89006343	35.07
chr1	89009557	89010250	11.03
chr1	89191069	89191880	14
chr1	89454357	89455169	12.22
chr1	89510254	89511022	20.2
chr1	89537816	89539114	34.99
chr1	89668361	89669235	11.63
chr1	89845803	89846807	14.73
chr1	89848350	89850041	14.7
chr1	90051627	90052783	125.62
chr1	90060487	90061032	11.36
chr1	90115458	90116442	32.65
chr1	90118994	90119837	23.63
chr1	90153067	90154195	66.83
chr1	90166253	90167357	14.48
chr1	90234500	90235269	14.64
chr1	90299757	90300978	102.69
chr1	90327349	90328312	16.71
chr1	90334427	90335694	37.92
chr1	90349487	90350297	14.57
chr1	90352731	90354238	79.76
chr1	90405295	90406238	35.48
chr1	90412323	90413354	11.09
chr1	90504253	90505951	71.71
chr1	90506534	90507321	12.31
chr1	90734881	90735843	20.66
chr1	90743623	90744776	87.28
chr1	91085127	91085919	31.46
chr1	91412900	91414697	12.02
chr1	91577778	91578723	11.67
chr1	91600426	91601940	52.72
chr1	91611029	91612197	12.09
chr1	91625872	91626838	27.91
chr1	91756846	91757863	14.44
chr1	91769841	91771147	96.89
chr1	91799097	91799998	54.44
chr1	91830075	91831167	12.91
chr1	91844176	91845410	16.37
chr1	91870253	91870993	15.17
chr1	91914286	91915385	35.3
chr1	92083104	92084522	184.21
chr1	92180082	92181130	12.23
chr1	92195742	92196483	10.53
chr1	92285601	92286587	16.9
chr1	92337238	92338294	129.04
chr1	92397448	92399421	111.11
chr1	92715621	92716611	20.17
chr1	92771716	92773608	143.88
chr1	92791008	92792132	43.51
chr1	93176361	93177289	11.14
chr1	93235043	93236025	6.63
chr1	93617849	93618698	32.16
chr1	93635370	93636372	7.54
chr1	94712332	94713309	17.62
chr1	94795971	94796430	8.75
chr1	96362479	96363485	12.73
chr1	97074360	97074832	12.8
chr1	105118228	105119084	12.52
chr1	105175440	105176405	40.39
chr1	105358553	105359313	21.47
chr1	105971367	105972328	74.62
chr1	106086454	106087358	45.99
chr1	106170960	106172252	16.78
chr1	106204187	106205109	39.13
chr1	106351163	106352201	62.55
chr1	106465308	106466116	14.18
chr1	106603068	106603996	13.9
chr1	106911946	106912945	12.83
chr1	108281976	108282873	14.4
chr1	111339985	111341029	26.94
chr1	114152522	114153550	59.09
chr1	118776554	118777266	12.6
chr1	118901726	118902861	30.88
chr1	118904139	118905745	221.86
chr1	118912817	118914322	27.29
chr1	118916184	118918387	79.46
chr1	118935970	118936933	13.15
chr1	119001492	119002232	6.26
chr1	119033407	119034434	105.04
chr1	119034577	119035721	31.26
chr1	119236489	119237507	26.03
chr1	119544450	119545932	13.36
chr1	120070057	120071029	46.26
chr1	120177449	120178287	13.03
chr1	120372268	120373251	8.9
chr1	120739169	120740230	44.29
chr1	120856946	120858352	41.37
chr1	120858911	120860153	13.58
chr1	121005054	121005783	26.16
chr1	121756366	121757148	11.18
chr1	124956877	124957840	11.93
chr1	125158244	125159068	20.42
chr1	125435131	125436136	12.88
chr1	126431357	126432254	37.31
chr1	126600487	126601640	20.07
chr1	126737872	126738669	11.09
chr1	127317487	127318206	12.47
chr1	127442690	127443544	9
chr1	127530852	127531959	11.75
chr1	127537158	127538216	12.99
chr1	128102701	128103836	28.62
chr1	128532390	128533358	25.66
chr1	128639571	128640398	20.59
chr1	128642827	128643809	11.3
chr1	128710862	128711763	22.44
chr1	129059069	129060127	19.22
chr1	130936067	130937017	30.79
chr1	130940074	130941090	30.69
chr1	131003777	131004850	48.34
chr1	131970564	131971697	12.1
chr1	132157048	132157924	22.79
chr1	132256026	132256814	11.34
chr1	132304357	132305383	231.68
chr1	132333584	132334251	7.48
chr1	132624826	132625801	21.86
chr1	132687857	132688833	16.46
chr1	132770888	132771833	8.95
chr1	132924644	132925567	33.51
chr1	133024669	133025683	12.3
chr1	133212844	133213724	16.53
chr1	133236532	133238538	54.46
chr1	133250747	133252363	83.65
chr1	133253093	133254219	27.31
chr1	133254788	133256369	35.3
chr1	133408611	133409982	107.32
chr1	133524777	133526444	192.8
chr1	133907706	133908611	19.63
chr1	134071101	134072118	19
chr1	134092214	134093373	14.17
chr1	134098175	134099515	26.68
chr1	134195493	134196480	13.94
chr1	134556455	134557442	11.65
chr1	134560491	134561608	12.72
chr1	134747306	134748071	22.79
chr1	134881339	134882111	15.42
chr1	135282716	135283605	30.69
chr1	135374661	135375592	6.29
chr1	135435593	135436531	20.59
chr1	135524145	135525149	13.96
chr1	135578595	135579791	11.18
chr1	135595456	135596549	140.83
chr1	135602971	135604115	93.98
chr1	135659173	135660472	62.3
chr1	135667964	135669052	23.79
chr1	135800090	135801228	114.45
chr1	135835595	135836653	12.43
chr1	136259417	136260538	17.39
chr1	136345684	136346690	15.45
chr1	136518487	136519751	31.8
chr1	136576965	136578710	168.14
chr1	136587395	136588473	96.28
chr1	136588625	136589515	12.55
chr1	136661485	136662509	21.64
chr1	136725041	136726150	26.13
chr1	136737415	136738474	20.18
chr1	136936517	136937439	17.05
chr1	137254789	137255571	14.4
chr1	137570842	137571800	13.43
chr1	137774318	137775101	45.63
chr1	137893817	137894771	22.26
chr1	137972702	137974074	27.33
chr1	138345746	138346538	9.25
chr1	138420719	138421462	14.61
chr1	138523590	138524467	13.44
chr1	138719195	138720054	34.17
chr1	138720603	138721391	15.05
chr1	138963214	138964176	10.32
chr1	139092435	139093379	12.42
chr1	139192278	139193138	19.07
chr1	139193730	139194803	35.6
chr1	139348218	139348910	11.34
chr1	140253536	140254430	17.6
chr1	142170939	142171933	12.9
chr1	144367390	144368099	30.75
chr1	146939340	146940377	17.89
chr1	148960704	148961439	56.79
chr1	149836155	149837229	57.99
chr1	150042915	150043617	10.84
chr1	150480470	150481237	11.41
chr1	150680351	150681109	12.91
chr1	150681769	150682566	19.77
chr1	150824163	150824982	59.02
chr1	150933312	150934237	15.85
chr1	150951440	150952436	14.86
chr1	150994518	150995319	14.73
chr1	151096702	151097526	31.3
chr1	151250533	151251318	10.52
chr1	151500585	151501554	6.7
chr1	151763523	151764311	11.04
chr1	151945378	151946163	23.21
chr1	152090911	152091994	18.41
chr1	152118701	152119193	11.1
chr1	152582854	152583513	19.93
chr1	152687119	152687833	22.4
chr1	152809551	152810369	10.64
chr1	153133693	153134855	18.44
chr1	153139543	153140383	14.96
chr1	153320626	153321647	18.17
chr1	153963323	153964350	16.71
chr1	154555502	154556605	57.26
chr1	154813755	154814672	10.45
chr1	155025746	155026609	12.41
chr1	155082787	155084072	20.18
chr1	155210653	155211684	10.68
chr1	155212152	155213194	11.82
chr1	155229541	155230460	25.95
chr1	155307654	155308742	29.71
chr1	155448734	155449470	10.03
chr1	155527102	155528276	55.21
chr1	155850157	155850854	8.49
chr1	156182770	156183670	33.81
chr1	156183824	156184885	20.83
chr1	156217219	156218123	11.8
chr1	156473887	156474697	12.08
chr1	156760496	156761401	30.64
chr1	156780025	156781636	11.95
chr1	156795869	156796694	17.03
chr1	156852172	156853231	26.32
chr1	157081067	157081712	10.51
chr1	157461986	157463028	14.62
chr1	157912060	157913030	11.71
chr1	158266596	158267657	30.36
chr1	158463401	158464374	13.82
chr1	158553936	158554918	11.74
chr1	158852699	158853484	7.4
chr1	158931116	158931937	10.01
chr1	159125733	159126467	14.61
chr1	159750510	159751425	37.54
chr1	160223872	160224926	118.43
chr1	160649497	160650693	17.06
chr1	160655964	160656866	11.23
chr1	160899588	160900437	23.83
chr1	161359259	161359957	13.91
chr1	161380030	161380996	22.01
chr1	161983052	161984966	18.57
chr1	162016717	162017610	22.68
chr1	162017737	162019052	34.16
chr1	162019894	162021419	95.45
chr1	162040652	162041580	50.24
chr1	162044020	162044993	18.13
chr1	162083026	162084038	30.79
chr1	162143880	162144775	17.77
chr1	162186560	162187513	18.74
chr1	162206918	162207932	13.21
chr1	162215694	162216508	73.82
chr1	162216534	162218029	44.65
chr1	162242736	162244142	78.66
chr1	162253602	162254985	304.31
chr1	162260278	162261357	34.94
chr1	163129098	163130089	31.78
chr1	163159670	163160357	12.08
chr1	163176598	163177837	187.15
chr1	163312828	163315540	119.51
chr1	163357576	163358728	146.19
chr1	163360506	163361517	29.49
chr1	163443585	163444696	51.9
chr1	163460944	163462032	7.92
chr1	163491546	163492482	10.77
chr1	163570706	163571712	18.44
chr1	163617845	163619048	40.23
chr1	163629568	163630396	19.1
chr1	163689089	163690207	51.3
chr1	163779308	163780083	14.62
chr1	163843691	163844763	88.14
chr1	163852650	163853822	110.6
chr1	163873705	163874918	297.71
chr1	164248241	164249543	12.32
chr1	164373685	164374719	16.76
chr1	164433631	164434711	40.36
chr1	165046384	165047385	111.61
chr1	165114585	165115432	13.94
chr1	165205322	165206250	15.82
chr1	165327405	165328435	61.91
chr1	165639206	165640260	38.51
chr1	165747977	165748848	82.61
chr1	165785999	165787094	25.09
chr1	165836168	165837108	10.15
chr1	166045530	166046450	14.66
chr1	166089404	166090226	14.36
chr1	166102815	166103615	26.35
chr1	166349520	166350474	14.11
chr1	166947705	166948709	27.1
chr1	167284483	167285632	12.84
chr1	167292252	167293203	81.12
chr1	167802519	167803427	11.15
chr1	168229951	168230852	32.94
chr1	168384949	168385985	28.56
chr1	168409707	168410808	179.12
chr1	168708294	168709299	39.13
chr1	169052934	169053651	84.79
chr1	169159597	169160461	10.01
chr1	169238216	169239463	40.68
chr1	169383595	169384248	12.01
chr1	169417606	169418495	23.69
chr1	169831470	169832197	11.41
chr1	169916330	169917181	19.27
chr1	170431059	170432061	25.64
chr1	170438586	170439624	40.69
chr1	170497511	170498231	14.18
chr1	170499579	170500456	49.78
chr1	171120720	171121630	22.47
chr1	171411017	171413147	42.31
chr1	171502981	171503698	23.22
chr1	171575767	171576661	10.49
chr1	171715988	171716963	30.14
chr1	172026880	172028120	19.95
chr1	172131996	172132683	10.78
chr1	172205873	172206830	9.88
chr1	172309569	172310530	11.01
chr1	173821049	173822061	127.1
chr1	173955463	173956384	47.22
chr1	174433419	174434371	78.22
chr1	174501552	174502156	7.72
chr1	175034823	175036258	77.57
chr1	175079770	175080415	38.18
chr1	176989966	176990925	15.3
chr1	177150281	177151139	22.14
chr1	178317760	178319506	9.55
chr1	178528268	178529288	8.54
chr1	178590424	178591423	10.14
chr1	178639568	178640618	15.19
chr1	178661078	178662169	237.51
chr1	178676954	178677954	21.02
chr1	178686967	178687924	15.44
chr1	178720601	178721554	10.63
chr1	178728014	178728801	12.35
chr1	178732378	178733576	11.36
chr1	178799873	178800895	14.66
chr1	178855547	178856515	8.2
chr1	178870629	178871580	18.24
chr1	178919646	178920878	30.17
chr1	178978409	178979533	163.77
chr1	179059869	179061057	104.69
chr1	179061436	179062555	78.57
chr1	179096809	179097722	16.75
chr1	179107638	179108701	25.93
chr1	179142876	179144027	13.19
chr1	179146666	179147420	11.17
chr1	179197111	179198931	42.72
chr1	179326412	179327294	14
chr1	179429163	179430185	19.5
chr1	179446251	179447260	17.8
chr1	179586128	179586961	20.37
chr1	180285856	180286651	12.29
chr1	180376448	180377470	14.72
chr1	180541553	180542481	38.23
chr1	180547403	180548429	14.54
chr1	180640658	180641949	12.67
chr1	181261844	181262824	19.05
chr1	181346775	181347748	10.29
chr1	181483864	181484918	10.94
chr1	181560634	181562406	12.2
chr1	181841722	181842959	8.2
chr1	182081724	182082715	11.6
chr1	182574010	182574833	15.24
chr1	182619886	182620953	14.52
chr1	182670413	182671386	11.99
chr1	182699673	182700664	25.53
chr1	182788626	182789695	18.02
chr1	182982969	182983746	14.49
chr1	183147186	183148758	25.73
chr1	183183282	183184376	14.96
chr1	183187687	183189713	83.59
chr1	183388343	183389409	22.41
chr1	183772269	183773363	40.45
chr1	184056828	184057665	14.11
chr1	184096673	184097586	15.43
chr1	184244475	184245517	39.41
chr1	184441025	184441663	10.3
chr1	184621751	184622749	18.59
chr1	184644795	184645789	30.48
chr1	184672062	184672999	10.19
chr1	184687439	184688439	18.55
chr1	184688567	184689305	21.9
chr1	184781893	184782989	76.01
chr1	185103493	185104562	40.58
chr1	185615649	185616391	10.55
chr1	185647033	185647936	14.3
chr1	185727532	185728529	15.96
chr1	185729941	185731737	41.23
chr1	185818956	185819694	10.27
chr1	185836255	185837392	52.45
chr1	185868439	185869238	16.14
chr1	186173393	186174139	59.78
chr1	186223206	186224198	74.71
chr1	186741258	186741926	11.09
chr1	187071806	187072824	83.36
chr1	187554740	187555612	11.66
chr1	187807232	187808544	16.09
chr1	187964273	187965558	27.64
chr1	188029250	188030095	24.73
chr1	188079462	188081068	75.84
chr1	188385696	188386553	22.16
chr1	188387599	188388608	10.95
chr1	188773253	188774354	29.41
chr1	188893025	188894319	77.31
chr1	189049871	189051172	53.33
chr1	189104944	189105938	20.03
chr1	189430404	189431187	11.04
chr1	189618997	189619711	13.61
chr1	189687837	189688709	9.43
chr1	189921101	189922733	8.3
chr1	189990049	189991346	15.72
chr1	189991423	189992417	11.15
chr1	190127526	190128482	11.66
chr1	190147641	190148735	35.84
chr1	190526008	190526991	13.98
chr1	190589447	190590323	18.32
chr1	190668659	190669687	64.39
chr1	191348833	191349717	10.07
chr1	191402270	191403221	30.76
chr1	191420014	191421201	201.56
chr1	191461630	191463033	84.77
chr1	191697920	191698846	25.88
chr1	191965127	191966088	48.21
chr1	192069959	192070860	10.23
chr1	192489102	192490136	12.34
chr1	192537040	192537751	14.28
chr1	192775588	192776598	24.13
chr1	192789482	192790652	27.27
chr1	192795809	192797145	262.64
chr1	192798537	192800414	38.03
chr1	192822660	192823833	20.3
chr1	192834309	192835772	98.25
chr1	192854956	192857106	17.96
chr1	192861341	192862249	10.34
chr1	192898388	192899477	17.01
chr1	192947658	192948333	12.49
chr1	193131077	193132092	10.97
chr1	193189026	193190062	60.71
chr1	193225163	193226212	26.08
chr1	193382068	193383093	28.18
chr1	193405956	193406786	98.01
chr1	193440567	193441443	10.13
chr1	193488041	193488797	19.18
chr1	193550315	193551456	38.33
chr1	193625198	193626107	16.1
chr1	193989228	193990503	25.04
chr1	194610147	194611255	96.85
chr1	194687564	194688346	9.38
chr1	194872123	194872765	15.75
chr10	3414524	3415586	52.3
chr10	3630706	3631364	11.92
chr10	4168030	4169092	13.23
chr10	4338875	4339817	16.66
chr10	4386619	4388216	20.62
chr10	4473171	4474202	22.78
chr10	4553334	4554182	20.13
chr10	4558678	4560037	33.12
chr10	5194320	5195291	12.63
chr10	5242862	5243528	14.84
chr10	5289030	5290080	29.45
chr10	6539737	6540773	109.08
chr10	7117589	7118597	155.84
chr10	7149918	7150885	7.98
chr10	7392087	7393080	43.76
chr10	7680815	7681907	11.34
chr10	8070246	8071131	15.91
chr10	8213019	8213946	25.9
chr10	8624592	8625544	21.22
chr10	8785452	8786294	12.74
chr10	8813997	8814916	20.1
chr10	8820739	8821522	12.42
chr10	8853194	8854437	44.88
chr10	8955532	8956394	15.66
chr10	8960519	8961599	74.76
chr10	8967707	8969629	82.48
chr10	8998018	8999160	24.68
chr10	9606785	9607946	64.43
chr10	9610261	9611080	11.23
chr10	9957371	9958317	10.82
chr10	9968651	9969193	14.99
chr10	11280419	11281476	9.67
chr10	11739246	11740413	97.02
chr10	12528847	12530423	49.71
chr10	12540378	12540930	11.84
chr10	12567427	12568168	11.19
chr10	12724226	12725252	14.25
chr10	12809596	12810438	19.08
chr10	12848245	12849289	33.14
chr10	12868064	12869550	12.28
chr10	12915465	12916394	35.29
chr10	12963824	12964801	11.95
chr10	13090216	13091283	14.18
chr10	13109651	13110543	11.98
chr10	13170647	13171841	20.44
chr10	13179982	13180653	11.37
chr10	13240284	13241166	9.36
chr10	13323740	13324710	7.24
chr10	13376012	13377026	74.53
chr10	13705686	13706398	40.96
chr10	13882992	13884096	44.42
chr10	17074374	17075425	13.87
chr10	17247990	17249023	21.71
chr10	17252857	17253726	13.57
chr10	17261240	17262499	15.07
chr10	17727321	17728450	17
chr10	18047602	18048249	10.15
chr10	18145899	18146460	10.3
chr10	18341496	18342243	28.15
chr10	18381908	18382762	17.86
chr10	19104970	19105788	10.11
chr10	19400597	19401615	17.56
chr10	19414273	19415727	103.41
chr10	19828219	19829418	13.01
chr10	19999544	19999973	9.8
chr10	20170341	20171050	7.55
chr10	20311698	20312856	10.77
chr10	20486598	20487727	63.76
chr10	20632796	20633685	6.83
chr10	21110848	21111475	12.12
chr10	21455671	21456470	22.74
chr10	21858234	21859329	166.14
chr10	22159135	22159961	11.98
chr10	22816041	22817022	20.99
chr10	22908244	22909252	77.77
chr10	22921240	22922033	11.01
chr10	23103609	23104109	11.15
chr10	23116788	23117549	10.51
chr10	23208979	23209906	19.24
chr10	23448797	23449607	20.22
chr10	23710672	23712535	73.96
chr10	23747081	23748078	20.67
chr10	23792915	23793498	11.61
chr10	23934626	23935548	22.95
chr10	24164017	24164992	32.24
chr10	24440647	24441526	10.38
chr10	24485326	24486401	20.56
chr10	24595187	24596173	9.37
chr10	24697990	24698941	17.41
chr10	24788522	24789457	13.97
chr10	24926666	24927769	42.21
chr10	25061267	25062256	27.59
chr10	25065115	25066269	15.38
chr10	25371655	25373164	43.95
chr10	25432724	25433670	18.87
chr10	25461321	25462451	22.27
chr10	25554709	25555703	16.66
chr10	25927450	25928467	16.27
chr10	26031739	26032758	26.01
chr10	26491736	26492854	36.83
chr10	26701530	26702537	48.77
chr10	26989883	26990887	29.28
chr10	27198175	27198834	23.97
chr10	27223702	27224550	11.41
chr10	27284956	27286185	17.31
chr10	28054221	28055255	15.3
chr10	28074347	28075230	10.2
chr10	28108298	28109133	12.22
chr10	28225255	28226327	22.7
chr10	28310908	28312024	139.25
chr10	28369521	28370502	69.08
chr10	29211284	29212226	34.93
chr10	29312971	29313754	12.99
chr10	29525413	29526454	73.22
chr10	29567669	29568329	12.56
chr10	29672264	29673265	22
chr10	29673284	29674482	174.28
chr10	29686422	29687452	32.74
chr10	29718988	29719856	19.71
chr10	29725180	29726070	40.16
chr10	29921399	29922145	10.4
chr10	30279621	30280725	65.22
chr10	30327569	30329108	60.67
chr10	30785964	30786817	19.3
chr10	30798218	30798911	20.37
chr10	30842478	30843212	6.53
chr10	30984745	30985325	22.89
chr10	31034433	31035327	11.56
chr10	31299940	31300793	17.63
chr10	31357385	31358166	19.18
chr10	31445245	31446146	10.09
chr10	31514752	31515575	13.04
chr10	32782533	32783507	20.18
chr10	33423512	33424445	43.82
chr10	34019041	34020195	16.92
chr10	34091570	34092533	18.07
chr10	34175958	34176814	18.72
chr10	34202144	34202923	21.39
chr10	35865306	35866161	14.45
chr10	36484681	36485558	27.08
chr10	37112165	37113061	17.75
chr10	37396902	37398119	157.37
chr10	37635885	37637823	80.4
chr10	37887604	37888567	17.2
chr10	38118540	38119194	28.39
chr10	38536031	38536863	19.02
chr10	39008462	39009605	34.48
chr10	39133291	39134633	24.02
chr10	39226259	39228313	67.22
chr10	39320877	39322863	27.43
chr10	39345749	39346753	41.78
chr10	39458499	39459438	26.17
chr10	39563039	39564707	42.01
chr10	39653723	39654647	11
chr10	39658990	39660161	52.22
chr10	39673711	39674742	22.44
chr10	39707975	39708788	32.09
chr10	40302010	40302849	13.11
chr10	40636987	40638112	113.03
chr10	40685403	40686053	7.92
chr10	40726915	40727921	30.11
chr10	40744229	40745097	12.96
chr10	40758232	40759343	90.58
chr10	40776794	40777978	71.14
chr10	41292607	41293611	59.83
chr10	41573122	41574147	63.36
chr10	41651868	41653054	31.92
chr10	42169889	42170759	93.67
chr10	42192767	42193776	18.1
chr10	42199150	42200202	18.96
chr10	42203195	42204199	16.37
chr10	42706001	42707671	31.02
chr10	42932749	42933855	12.61
chr10	42949226	42950582	15.74
chr10	43033643	43034632	12.15
chr10	43097543	43098492	13.3
chr10	43113078	43114003	24.88
chr10	43124286	43125283	23.05
chr10	43331958	43333097	71.12
chr10	43478290	43479475	11.36
chr10	43483211	43484229	16.26
chr10	43578174	43579777	70.01
chr10	43623879	43624768	11.63
chr10	43648762	43649939	48.58
chr10	43721937	43723864	25.32
chr10	43739727	43740803	30.77
chr10	44177151	44177916	20.24
chr10	44348297	44349118	10.6
chr10	44352860	44353926	26.45
chr10	44477875	44478903	28.83
chr10	44490765	44491455	12.47
chr10	44499316	44500751	126.66
chr10	44535807	44536807	12.64
chr10	44764796	44765693	25.03
chr10	44870485	44871314	16.71
chr10	44979248	44980002	14.92
chr10	44986908	44988304	53.04
chr10	45086058	45087211	57.62
chr10	45229464	45230757	310
chr10	45605545	45606445	13.08
chr10	45772547	45773278	11.99
chr10	45781303	45782161	11.87
chr10	45783233	45784612	19.93
chr10	45806629	45807649	11.28
chr10	45886462	45887596	20.84
chr10	45889499	45890347	10.45
chr10	45893394	45894613	310
chr10	46080856	46081637	28.85
chr10	46939799	46940424	14.65
chr10	50763162	50764197	26.39
chr10	52258112	52259151	43.29
chr10	53096151	53097142	10.06
chr10	53398273	53399248	24.67
chr10	53444657	53445481	16.35
chr10	54017600	54018595	69.62
chr10	54058592	54059773	86.36
chr10	54161226	54161933	22.68
chr10	54403045	54404050	19.13
chr10	55684810	55685591	25.31
chr10	56114844	56115642	22.77
chr10	56423896	56425379	24.64
chr10	56431577	56432398	8.4
chr10	56517136	56518017	17.34
chr10	56530932	56531798	19.98
chr10	56610552	56611353	25.05
chr10	56838834	56839934	91.8
chr10	56921043	56922055	12.06
chr10	56979302	56980322	10.81
chr10	57596728	57597668	17.23
chr10	58382455	58383609	68.49
chr10	58446375	58447506	12.45
chr10	58650757	58651831	41.96
chr10	58932272	58933191	8.02
chr10	59114402	59115414	35.63
chr10	59208732	59209587	18.55
chr10	59220990	59221894	10.08
chr10	59287279	59288331	115.43
chr10	59622313	59623356	23.65
chr10	59784719	59785622	13.64
chr10	59920169	59921686	43.02
chr10	59952637	59953746	68.78
chr10	60085545	60086412	58.92
chr10	60362174	60363038	10.09
chr10	60794023	60795125	12.06
chr10	60811704	60812409	11.11
chr10	60813429	60815428	27.17
chr10	60815522	60816567	59.52
chr10	60838543	60839503	15.01
chr10	60877627	60878815	36.91
chr10	60892902	60893727	30.1
chr10	60917725	60918635	23.96
chr10	60955266	60956176	19.23
chr10	60976131	60977088	17.31
chr10	61226417	61227317	136.06
chr10	61239949	61240868	9.93
chr10	61386091	61386929	19.21
chr10	61826477	61827604	10.8
chr10	61919569	61921726	51.66
chr10	62308804	62309403	25.7
chr10	62791582	62792433	9.15
chr10	62843362	62844493	34.17
chr10	62866460	62867188	25.36
chr10	63099845	63100874	12.09
chr10	63457160	63457833	16.56
chr10	63485371	63485885	18.08
chr10	65309032	65309672	12.25
chr10	66177067	66177920	26.11
chr10	66909942	66911066	26.66
chr10	66921132	66922130	22.97
chr10	66972882	66974028	50.86
chr10	67002317	67005146	22.95
chr10	67103981	67105074	32.66
chr10	67209568	67210555	18.24
chr10	67978904	67980037	15.13
chr10	68192716	68193681	10.96
chr10	68282926	68283722	9.77
chr10	68979564	68980354	51.32
chr10	69252947	69254083	316.39
chr10	69262802	69264314	20.39
chr10	69278510	69279626	38.79
chr10	69351986	69353586	18.18
chr10	69535273	69536276	19.86
chr10	69583395	69584916	79.86
chr10	69619266	69620286	13.72
chr10	69628256	69629261	39.18
chr10	69711976	69712724	16.44
chr10	69738386	69739480	20.35
chr10	69786769	69788341	17.76
chr10	69925246	69926222	26.8
chr10	70148887	70150044	21.81
chr10	70291638	70292708	20.46
chr10	70587669	70588582	26.19
chr10	70968853	70969898	23.97
chr10	71060004	71060876	10.48
chr10	71237571	71238572	9.94
chr10	71344243	71345387	11.46
chr10	74679760	74680963	82.07
chr10	75036794	75037706	8.12
chr10	75054400	75055423	17.47
chr10	75098191	75099098	26.7
chr10	75547648	75548750	65.93
chr10	75588950	75589847	13.77
chr10	75892590	75893593	14.48
chr10	75915482	75916314	27.05
chr10	76585892	76586811	62.6
chr10	76732552	76734040	23.8
chr10	76973816	76974605	7.61
chr10	77150037	77150962	15.83
chr10	77159287	77160274	9.89
chr10	77165337	77166000	10.7
chr10	77683824	77684926	11.24
chr10	78170164	78170975	10.66
chr10	78290737	78291788	46.53
chr10	79101763	79102656	17.12
chr10	79703819	79704737	11.49
chr10	79712064	79713034	15.81
chr10	79932409	79933511	105.73
chr10	79989598	79990778	17.72
chr10	80148929	80149981	11.33
chr10	80149993	80151461	17.74
chr10	80164519	80166537	153.07
chr10	80260792	80261911	11.01
chr10	80264603	80265362	10.68
chr10	80301802	80302847	10.94
chr10	80398456	80400201	18.32
chr10	80701403	80702750	10.04
chr10	80741837	80742879	10.54
chr10	80774168	80775211	12.52
chr10	81523994	81525031	32.08
chr10	82666299	82667128	12.32
chr10	82763294	82764402	15.99
chr10	83083756	83084878	45.74
chr10	83161727	83162855	44.02
chr10	83895381	83896342	14.57
chr10	83914430	83915427	7.32
chr10	83941756	83942784	94.64
chr10	83946485	83947401	11.63
chr10	83992231	83993214	10.16
chr10	83995552	83996510	7.54
chr10	84201535	84202543	21.86
chr10	84384898	84385836	47.88
chr10	84387118	84388910	21.31
chr10	84392231	84393065	10.43
chr10	84440019	84441723	89.21
chr10	84477447	84478479	61.58
chr10	84532794	84534448	12.38
chr10	84592390	84593481	28.88
chr10	84733404	84734491	11.63
chr10	84792968	84793942	24.71
chr10	84885538	84886906	18.27
chr10	84939243	84940087	10.44
chr10	84967422	84968834	158.71
chr10	85001679	85002567	11.94
chr10	85140622	85142125	181.49
chr10	85213085	85214067	48.06
chr10	85400608	85401528	62.18
chr10	85916805	85917618	11.32
chr10	86322965	86323938	13.35
chr10	86380141	86382563	236.1
chr10	86425466	86426354	12.46
chr10	86772916	86773777	16.35
chr10	87812085	87813044	192.78
chr10	87858102	87859517	10.9
chr10	87867059	87868072	16.34
chr10	87868224	87869305	19.78
chr10	88045664	88046821	55.08
chr10	88604743	88605504	8.51
chr10	89257943	89259397	13.64
chr10	91222076	91223060	13.84
chr10	91229069	91229923	9.96
chr10	91326564	91327660	41.28
chr10	91435023	91435854	11.66
chr10	91747532	91748214	11.81
chr10	91793461	91794397	12.54
chr10	92298439	92299368	71.24
chr10	92943174	92943941	9.33
chr10	93447059	93447842	11.78
chr10	93497076	93497963	20.93
chr10	93635672	93636769	73.11
chr10	93647655	93648522	10.77
chr10	93818372	93819405	31.05
chr10	94110967	94111995	57.12
chr10	95040236	95041147	19.52
chr10	95043493	95044736	109.03
chr10	95083393	95084516	114.13
chr10	95116988	95118087	20.8
chr10	95183872	95184832	22.86
chr10	95221486	95222652	96.1
chr10	95227147	95228058	44.84
chr10	95729587	95730760	63.04
chr10	96743923	96745000	31.51
chr10	96909501	96910246	12.67
chr10	97265860	97266648	26.19
chr10	97536567	97537552	27.55
chr10	98543496	98544429	106.74
chr10	98624576	98625467	26.73
chr10	98653777	98654817	32.28
chr10	98831199	98831923	11.46
chr10	98913719	98914543	10.46
chr10	99106714	99107683	11.02
chr10	99115070	99116182	18.57
chr10	99118438	99119280	11.92
chr10	99171938	99172829	16.49
chr10	99188674	99189830	46.59
chr10	99202380	99203167	14.32
chr10	99268500	99269682	40.65
chr10	99285015	99286117	25.7
chr10	99298449	99299764	237.07
chr10	99301643	99302799	236.83
chr10	99353462	99354449	11.82
chr10	99390179	99391285	28.54
chr10	99579835	99580854	10.82
chr10	99811876	99813042	52.64
chr10	99879053	99880100	15.29
chr10	100263630	100264747	63.27
chr10	101889505	101890490	17.48
chr10	102777029	102777957	29.76
chr10	102946883	102948011	68.57
chr10	103000739	103001656	116.98
chr10	103027199	103028142	14.29
chr10	103909935	103910693	25.37
chr10	104612734	104613437	22.78
chr10	104852782	104853598	11.28
chr10	105025632	105026444	19.44
chr10	105028780	105029805	16.79
chr10	105427399	105428110	20.27
chr10	105501332	105502484	61.03
chr10	107900950	107902424	81.73
chr10	107946193	107947051	59.62
chr10	108023893	108024767	24.81
chr10	108146220	108147090	98.17
chr10	108172825	108173838	10.51
chr10	108303205	108304001	10.61
chr10	108453479	108454199	14.18
chr10	108471695	108472443	32.41
chr10	108489903	108490879	37.49
chr10	109830412	109831343	12.61
chr10	110585688	110586556	10.53
chr10	110918585	110919685	37.18
chr10	111009915	111011442	78.71
chr10	111581652	111582660	27.71
chr10	111595314	111596113	27.03
chr10	111701185	111702008	25.28
chr10	112928221	112929413	21.14
chr10	115775673	115776864	17.28
chr10	116131771	116132850	40.04
chr10	116338354	116339322	23.42
chr10	116364526	116365373	17.3
chr10	116697375	116698440	13.67
chr10	116715763	116716646	13.77
chr10	116964928	116966007	65.37
chr10	117020808	117021766	27.73
chr10	117376462	117377452	8.39
chr10	117461768	117462834	28.7
chr10	117583326	117584502	211.52
chr10	117845062	117845819	13
chr10	117905280	117906442	59.11
chr10	117946769	117947837	58.84
chr10	118648610	118649688	28.43
chr10	119098690	119099435	36.54
chr10	119131718	119132452	14.61
chr10	120250934	120252108	110.49
chr10	120294283	120295150	28.14
chr10	120328072	120329076	33.22
chr10	120397102	120398102	17.88
chr10	120444278	120445215	11.33
chr10	120512959	120514515	47.05
chr10	120551561	120552519	8.78
chr10	120571001	120571873	12.8
chr10	120579881	120580880	46.34
chr10	120582174	120583153	10.34
chr10	120612380	120613238	10.67
chr10	120647669	120648819	24.68
chr10	120697405	120698327	10.77
chr10	120706735	120708487	38.88
chr10	120716880	120717867	18.11
chr10	120744276	120745543	12.7
chr10	120751633	120752492	11.86
chr10	120763741	120764861	12.08
chr10	120800985	120802534	138.82
chr10	120821421	120822527	55.31
chr10	120871877	120873152	214.24
chr10	120986074	120987077	19.86
chr10	121016334	121017382	12.44
chr10	121020757	121021754	12.26
chr10	121029914	121030734	32.78
chr10	121040608	121041650	14.93
chr10	121099354	121100302	18.83
chr10	121227439	121228440	19.65
chr10	121435407	121437396	33.47
chr10	121453099	121454115	12.56
chr10	121475383	121476791	16.85
chr10	121836580	121837842	28.01
chr10	122025028	122026013	14.26
chr10	122534460	122535233	11.94
chr10	122563832	122564706	19.59
chr10	122574995	122576070	27.74
chr10	122767975	122769539	28.52
chr10	122884197	122885012	10.81
chr10	122886338	122888160	52.97
chr10	122910436	122911679	10.27
chr10	122912490	122913432	10.66
chr10	123799983	123800766	67.84
chr10	124183604	124184501	18.1
chr10	124349306	124349793	16.36
chr10	125328293	125329165	16.34
chr10	125725424	125726433	15.01
chr10	125735928	125736883	45.06
chr10	125773225	125773928	11.16
chr10	125810536	125811309	14.35
chr10	125921663	125922885	17.84
chr10	125954098	125954976	10.82
chr10	125965772	125966484	14.68
chr10	125970187	125970923	31.25
chr10	126168651	126169546	36.57
chr10	126851191	126852031	18.66
chr10	126958296	126958917	13.3
chr10	126988467	126989497	18.44
chr10	127167355	127168230	10.36
chr10	127188225	127189160	15.49
chr10	127288636	127290072	48.18
chr10	127524164	127524915	11.27
chr10	127615068	127616974	27.43
chr10	127721680	127722560	7.77
chr10	128034621	128035967	17.74
chr10	128376678	128377808	10.62
chr10	128501085	128501991	57.55
chr10	130224717	130225486	21.15
chr11	3292207	3293282	10.31
chr11	3371068	3371963	22.73
chr11	3373898	3375487	40.85
chr11	3451906	3452840	10.62
chr11	3514482	3515313	8.38
chr11	3538841	3539672	9.87
chr11	4629627	4630576	11.76
chr11	5165485	5166310	35.21
chr11	5191864	5192585	9.26
chr11	5541597	5542623	9.61
chr11	5727777	5728457	9.64
chr11	5995695	5996660	15.73
chr11	6291696	6293039	25.38
chr11	6388567	6389603	13.09
chr11	6406047	6407028	10.89
chr11	6774283	6775160	96.62
chr11	6859707	6860621	25.39
chr11	7196744	7197736	14.11
chr11	7271599	7273136	13.79
chr11	8068658	8069602	20.31
chr11	8232539	8233550	15.1
chr11	8623987	8625005	16.2
chr11	8656460	8658059	17.22
chr11	8658761	8659637	15.76
chr11	8701849	8702855	11.93
chr11	8716721	8717497	14.57
chr11	8761136	8762143	25.82
chr11	8763210	8763850	6.87
chr11	8781004	8782126	25.25
chr11	8799251	8800061	24.55
chr11	8811358	8812282	11.52
chr11	8814077	8815185	32.09
chr11	8816192	8817630	22.03
chr11	11821333	11823434	15.68
chr11	11831544	11832477	13.2
chr11	11840510	11841365	21.63
chr11	11855119	11855903	16.67
chr11	11862327	11863338	13.86
chr11	11871141	11871985	6.99
chr11	11878332	11879420	66.89
chr11	11958144	11958972	36.2
chr11	11961598	11962646	94.95
chr11	12430170	12431123	46.1
chr11	12589511	12590385	12.86
chr11	12810870	12811969	52.32
chr11	16411222	16412288	13.66
chr11	16700737	16701800	18.1
chr11	16796077	16797089	21.52
chr11	16864979	16865738	11.53
chr11	17232419	17233280	13.94
chr11	17414369	17415217	43.66
chr11	17449938	17451116	47.64
chr11	17460630	17461261	12.41
chr11	17603071	17604187	26.1
chr11	17636893	17637748	32.59
chr11	18010940	18012757	50.76
chr11	18151799	18152781	12.47
chr11	18451097	18452090	43.88
chr11	18489531	18490501	21.92
chr11	18658132	18658865	16.74
chr11	18712277	18713413	12.13
chr11	18726531	18727285	10.37
chr11	18747663	18748703	14.83
chr11	18758283	18759273	36.38
chr11	18855698	18856763	167.34
chr11	18885481	18886649	51.43
chr11	18927492	18928516	10.76
chr11	18930350	18931647	43.43
chr11	18945344	18946440	28.02
chr11	19007505	19008733	10.73
chr11	19012994	19013792	10.53
chr11	19188822	19189438	11.49
chr11	19347427	19348467	17.61
chr11	19355909	19356494	17.4
chr11	19423486	19424863	23.85
chr11	19610272	19611780	20.45
chr11	19630907	19632071	35.64
chr11	19759596	19760603	17.69
chr11	19920082	19920945	9.12
chr11	19966002	19966825	11.04
chr11	19969269	19970218	17.32
chr11	19986132	19987792	87.87
chr11	20010825	20012070	43.17
chr11	20332285	20333511	30.22
chr11	20588986	20590081	39
chr11	20603184	20604071	42.94
chr11	20631540	20632570	14.37
chr11	20882426	20883353	10.32
chr11	20938927	20939689	11.06
chr11	21238436	21239714	8.01
chr11	21370229	21371244	14.41
chr11	21398992	21400121	17
chr11	23047809	23048821	10.91
chr11	23632835	23633592	10.32
chr11	24062227	24063319	16.1
chr11	24073830	24074838	12.91
chr11	24077356	24078323	11.67
chr11	24202216	24203570	80.68
chr11	24203981	24204927	21.07
chr11	24208456	24209493	74.19
chr11	24302648	24303643	14.72
chr11	24312908	24313573	10.26
chr11	24613737	24614729	17.53
chr11	24643351	24644436	21.75
chr11	24801860	24802932	12.31
chr11	25040884	25041640	16.9
chr11	25056861	25057715	12.55
chr11	25099802	25100555	36.03
chr11	25104120	25105303	42.42
chr11	25595373	25596222	12.01
chr11	26489644	26490741	192.61
chr11	28375601	28376270	10.43
chr11	28692650	28693533	12.93
chr11	28892596	28893614	23.81
chr11	29172515	29174074	23.38
chr11	29514629	29515387	9.71
chr11	29636535	29637666	76.26
chr11	30160805	30161850	12.19
chr11	30257539	30258443	12.01
chr11	31999837	32000910	16
chr11	32001371	32002336	17.16
chr11	32112365	32112979	13.13
chr11	32363764	32364962	13.85
chr11	32454697	32455923	12.14
chr11	32642524	32643519	10.03
chr11	32743674	32744570	10.74
chr11	32783768	32784569	20.42
chr11	33112033	33113108	28.71
chr11	33607567	33608493	10.42
chr11	33613137	33614132	18.7
chr11	33752266	33753076	18.03
chr11	34904024	34905420	98.54
chr11	34909472	34910809	183.37
chr11	34911717	34912687	54.73
chr11	34959114	34959867	26.32
chr11	35011792	35012893	12.02
chr11	35119664	35120706	70.19
chr11	35332618	35333568	15.86
chr11	35350188	35351551	31.78
chr11	35364317	35365042	19.13
chr11	35370411	35371129	12.41
chr11	35393434	35394504	10.74
chr11	35412135	35413397	29.46
chr11	35416717	35418852	200.11
chr11	35427804	35428803	53.64
chr11	35434684	35435833	166.59
chr11	35451207	35452424	21.67
chr11	35544052	35545067	13.54
chr11	35593358	35594348	10.5
chr11	35769100	35770229	11.07
chr11	36309137	36309833	12.85
chr11	36338156	36338971	12.54
chr11	36441638	36442703	50.39
chr11	36503694	36504524	7.92
chr11	36625472	36626346	29.57
chr11	37031196	37032183	8.91
chr11	37051578	37052172	27.69
chr11	37248773	37249508	19.91
chr11	38321114	38321978	18.37
chr11	39903534	39904469	14.91
chr11	39923805	39924673	16.9
chr11	39953664	39954515	10.18
chr11	40850462	40851137	10.98
chr11	41536692	41537697	26.32
chr11	41644945	41645972	14.23
chr11	42906627	42907486	19.18
chr11	43547880	43548733	14.26
chr11	43559499	43560347	14.57
chr11	43574831	43575842	25.74
chr11	43625903	43626622	10.58
chr11	43633642	43634684	169.16
chr11	43914486	43915573	24.54
chr11	44665874	44667536	41.91
chr11	44691426	44692413	23.01
chr11	44696582	44697592	30.84
chr11	44791452	44792294	10.61
chr11	45485684	45486671	11.82
chr11	45678646	45679153	10.61
chr11	45817609	45818431	21.45
chr11	45841671	45842497	7.62
chr11	46056799	46057619	80.72
chr11	46072851	46074048	17.6
chr11	46205497	46206670	46.93
chr11	46213534	46214454	14.57
chr11	46753331	46754424	31.91
chr11	46795408	46796306	10.84
chr11	48314061	48314943	49.59
chr11	48777849	48778685	23.4
chr11	48861202	48862086	44.98
chr11	49243593	49244628	16.12
chr11	49926918	49927821	15.6
chr11	50291442	50292834	12.8
chr11	50621927	50623050	22.54
chr11	50653824	50654546	14.15
chr11	50655846	50657027	91.42
chr11	51289506	51290755	13.82
chr11	51343134	51343865	10.72
chr11	51386190	51387071	21.05
chr11	51388670	51389626	63
chr11	51390216	51390953	29.29
chr11	51401622	51402605	48.69
chr11	51406158	51407266	30.96
chr11	51468869	51470120	173.15
chr11	51499708	51500680	11.44
chr11	51501984	51503082	18.81
chr11	51507264	51508304	13.43
chr11	51522964	51523840	18.34
chr11	51532909	51533760	39.19
chr11	51538001	51539167	97.38
chr11	51543066	51544301	37.64
chr11	51545619	51546677	32.93
chr11	51605541	51606816	12.47
chr11	51688389	51689628	12.21
chr11	52286173	52287426	10.39
chr11	53048646	53049534	15.86
chr11	53062813	53063805	60.98
chr11	53069411	53070460	79.08
chr11	53091159	53092231	81.94
chr11	53350203	53351187	7.95
chr11	53516667	53517464	12.51
chr11	53888714	53889696	88.5
chr11	53931386	53932009	15.43
chr11	54058371	54059410	12.38
chr11	54060021	54061111	26.84
chr11	54066906	54067927	35.1
chr11	54102763	54103803	80.88
chr11	54112550	54113430	16.96
chr11	54126323	54127382	31.85
chr11	54162532	54163468	10.96
chr11	55405862	55406688	34.05
chr11	55418600	55420205	17.64
chr11	55427885	55428743	36.79
chr11	55624853	55625895	17.9
chr11	55799292	55800225	7.77
chr11	56598564	56599268	15.9
chr11	56958730	56959509	17.95
chr11	57004212	57004989	19.46
chr11	57548643	57549756	11.86
chr11	57671050	57672328	137.36
chr11	57687867	57689611	79.48
chr11	57717034	57717964	72
chr11	57779439	57780561	12.34
chr11	57864180	57865104	14.48
chr11	57866248	57867143	11.4
chr11	57929127	57930209	70.38
chr11	58193343	58194068	10.47
chr11	58225456	58226416	10.46
chr11	58618161	58619074	10.5
chr11	59201754	59202738	11.86
chr11	59238709	59239861	33.14
chr11	59384084	59385415	76.14
chr11	59921153	59922107	44.27
chr11	60027625	60028830	17.69
chr11	60104726	60107068	17.74
chr11	60113526	60114288	23.02
chr11	60165728	60166464	13.81
chr11	60277414	60278390	15.19
chr11	60895570	60896683	141.15
chr11	61024910	61025759	8.43
chr11	61027886	61028831	8.2
chr11	61070895	61072213	22.41
chr11	61174365	61175804	13.45
chr11	61483112	61484153	17.4
chr11	61484603	61486003	23.37
chr11	62076165	62077362	177
chr11	62209573	62210594	16.21
chr11	62283669	62284610	10.7
chr11	62441964	62443102	161.98
chr11	62591562	62592719	139.17
chr11	62605710	62607055	21.14
chr11	62629981	62630927	15.87
chr11	62986494	62987507	34.05
chr11	63020503	63022066	45.31
chr11	63023539	63024737	95.63
chr11	63039686	63040518	16.2
chr11	63129455	63130447	17.26
chr11	63252688	63253890	46.91
chr11	63486458	63487911	191.82
chr11	63545238	63546255	37.15
chr11	63569768	63570815	28.38
chr11	63703749	63704668	12.18
chr11	63789449	63790289	13.41
chr11	63916494	63918342	103.81
chr11	64000813	64001718	16.23
chr11	64320793	64321453	10.9
chr11	64587572	64589221	35.91
chr11	64634410	64636101	56.34
chr11	64642880	64643758	99.91
chr11	64650636	64651561	12.1
chr11	64662827	64664103	24.61
chr11	64671685	64672580	167.6
chr11	64738805	64739814	12.68
chr11	64800565	64801850	25.05
chr11	64833075	64834643	140.01
chr11	64880269	64881352	90.73
chr11	64968294	64969812	127.73
chr11	65207818	65208866	24.18
chr11	65269557	65270524	8.03
chr11	65303636	65304359	15
chr11	65504903	65505781	22.59
chr11	65661783	65662710	15.52
chr11	65671187	65671873	14.14
chr11	65671919	65672684	12.15
chr11	66983003	66984104	11
chr11	67566460	67567295	34.55
chr11	68195440	68196808	20.58
chr11	68220539	68221494	11.28
chr11	68434736	68435811	16.09
chr11	68592119	68594480	34.4
chr11	68601112	68602815	49.26
chr11	68612957	68614146	21.55
chr11	68637707	68639072	53.18
chr11	68653782	68654954	51.54
chr11	68726612	68727928	46.97
chr11	68753782	68754803	10.64
chr11	68780128	68781049	11.24
chr11	69073231	69073993	10.47
chr11	69086911	69087740	22.6
chr11	69150775	69151799	14.86
chr11	69395688	69396893	13.49
chr11	69397861	69398768	12.04
chr11	69452138	69453243	14.15
chr11	69461269	69462322	46.92
chr11	69474560	69475398	13.87
chr11	69510824	69511564	14.49
chr11	69558806	69559970	34.7
chr11	69560055	69562001	88.66
chr11	69562893	69564002	51.81
chr11	69564290	69565932	138.49
chr11	69715592	69716600	13.9
chr11	69836418	69838052	36.02
chr11	69900659	69902200	7.38
chr11	69980077	69981164	17.45
chr11	70059519	70060511	10.26
chr11	70229444	70230327	6.93
chr11	70614558	70615570	23.68
chr11	71517107	71517979	43.46
chr11	71779714	71780519	8.2
chr11	71886781	71888097	43.89
chr11	71914082	71915894	35.5
chr11	72308427	72309556	35.74
chr11	72407249	72408308	25.56
chr11	72606665	72608891	9.43
chr11	74403875	74404795	16.7
chr11	74498727	74499651	11.34
chr11	74546832	74547762	36.27
chr11	74810956	74811675	10.28
chr11	74831509	74832809	56.62
chr11	75013647	75014803	89.26
chr11	75049462	75050339	56.26
chr11	75146782	75147709	29.78
chr11	75193874	75194871	12.55
chr11	75208814	75209767	15.34
chr11	75227460	75228297	10.6
chr11	75460945	75462062	10.49
chr11	76042161	76043067	6.57
chr11	76120208	76121202	18.62
chr11	76125147	76126207	26.58
chr11	76179189	76180252	28.01
chr11	76255449	76256789	49.72
chr11	76294501	76295398	6.64
chr11	76309686	76310584	12.5
chr11	76327797	76329107	27.56
chr11	76350622	76351501	10.91
chr11	76361204	76362159	24.07
chr11	76379523	76380744	26.06
chr11	76398325	76399559	14.48
chr11	76429244	76430772	22.27
chr11	76494292	76496137	11.86
chr11	76499651	76500694	38.03
chr11	76523132	76523992	17.75
chr11	76826814	76827522	11.08
chr11	77492716	77494201	9.1
chr11	77886929	77888075	97.3
chr11	78163601	78164623	10.81
chr11	78188073	78189913	15.94
chr11	78596695	78597405	11.05
chr11	78829688	78830744	11.07
chr11	78931284	78932187	24.21
chr11	79022924	79023811	10.87
chr11	79140985	79141963	17.16
chr11	79164162	79165006	14.55
chr11	79293608	79295392	75.13
chr11	79778935	79779895	14.47
chr11	79805655	79806799	28.76
chr11	79860144	79861104	19.3
chr11	79906774	79907685	15.22
chr11	79928020	79928971	91.12
chr11	80498420	80499274	18.46
chr11	80818000	80819134	30.07
chr11	80848176	80848945	13.97
chr11	80973321	80974086	11.44
chr11	81146477	81147357	10.89
chr11	81277314	81278354	11.99
chr11	81298556	81299886	86.79
chr11	81339117	81340194	10.28
chr11	81369806	81370936	55.89
chr11	81449029	81450378	25.02
chr11	81501621	81502584	13.97
chr11	82487509	82488474	15.85
chr11	82518620	82519698	33.98
chr11	82569181	82570457	39.78
chr11	84713894	84714959	25.9
chr11	85255306	85256330	26.6
chr11	85430973	85431593	8.66
chr11	85583829	85584765	9.78
chr11	85628149	85629456	153.69
chr11	85638311	85639367	26.12
chr11	85643444	85644452	10.96
chr11	85663186	85664269	17.49
chr11	85668531	85669299	11.65
chr11	85686907	85687610	21.2
chr11	85709053	85709830	7.21
chr11	85709831	85710879	30.67
chr11	85712661	85714137	20.82
chr11	85719962	85721466	195.27
chr11	85733377	85736072	89.62
chr11	85736914	85738389	121.62
chr11	85750826	85751890	13.43
chr11	85799527	85801146	195.28
chr11	85818012	85819061	42.75
chr11	85823470	85824449	14.19
chr11	85832015	85833238	14.61
chr11	85837241	85838348	38.61
chr11	85875617	85877100	137.94
chr11	85909762	85910881	223.52
chr11	85916948	85919325	100.72
chr11	85941526	85942405	16.88
chr11	85973434	85974467	30.26
chr11	85976570	85977661	22.59
chr11	86484583	86485376	25.25
chr11	86543812	86545239	34.8
chr11	86757061	86758328	12.7
chr11	87263650	87264793	14.94
chr11	87279028	87280039	22.87
chr11	87422344	87423405	11.97
chr11	88067671	88069132	15.42
chr11	88139653	88140678	18.84
chr11	88158588	88159244	16.38
chr11	88161648	88162501	13.2
chr11	88248262	88248999	15.24
chr11	88418845	88419663	87.67
chr11	88425404	88426333	16.27
chr11	88506663	88507390	12.71
chr11	88511551	88512372	14.38
chr11	88527716	88529400	98.25
chr11	88547214	88548386	54.16
chr11	88555022	88556645	122.46
chr11	88560918	88561781	11.19
chr11	88566242	88567440	21.03
chr11	88593922	88594773	33.91
chr11	88600419	88601331	20.28
chr11	88693528	88694527	19.93
chr11	88702789	88703786	16.1
chr11	88856296	88857444	16.7
chr11	89115834	89116759	25.9
chr11	89186640	89187560	12.37
chr11	89297931	89298879	16.21
chr11	89299674	89300464	12.34
chr11	89819294	89819957	10.4
chr11	89922261	89923310	17.68
chr11	89971311	89972022	19.45
chr11	90007283	90008402	132.67
chr11	90129687	90130512	13.11
chr11	90223729	90224805	21.42
chr11	90249015	90250006	9.51
chr11	92233101	92234181	73.5
chr11	93655508	93656407	21.97
chr11	93683361	93684366	12.15
chr11	93733222	93734084	22.32
chr11	93817673	93818908	26.52
chr11	94327505	94329240	37.01
chr11	94385755	94386523	9.81
chr11	94465028	94465775	11.72
chr11	94525851	94527131	25.58
chr11	94527552	94528253	8.97
chr11	94876408	94877268	11.76
chr11	94880512	94883210	47.11
chr11	94928357	94929633	115.93
chr11	95085264	95086117	42.47
chr11	95100140	95101050	14.9
chr11	95238228	95239104	13.98
chr11	95565021	95566099	19.37
chr11	95567914	95569016	38.54
chr11	95575129	95576590	42.4
chr11	95594555	95595429	23.14
chr11	95620614	95621744	21.09
chr11	95630880	95631956	18.48
chr11	95712756	95713700	10.49
chr11	95990948	95991985	16.8
chr11	96017732	96018535	36.02
chr11	96214423	96215438	28.33
chr11	96271482	96272617	10.39
chr11	96306106	96307563	59.11
chr11	96315983	96316963	19.8
chr11	96323195	96324229	12.92
chr11	96325630	96326631	10.91
chr11	96396593	96398472	203.87
chr11	96399743	96400702	19.83
chr11	96420659	96422230	174.11
chr11	96431474	96432584	31.45
chr11	96461643	96463095	11.84
chr11	96465236	96466209	11.05
chr11	96504545	96505414	17.17
chr11	96510883	96511944	21.34
chr11	96512051	96513104	160.95
chr11	96875573	96876947	19.9
chr11	96891729	96892875	127.97
chr11	96977599	96978805	22.67
chr11	96991732	96992583	10.4
chr11	97025640	97026588	9.12
chr11	97144595	97145332	11.57
chr11	97186670	97188154	11.17
chr11	97562464	97563231	17.5
chr11	97733392	97734475	14.61
chr11	97876958	97878107	130.78
chr11	98479083	98480027	11.24
chr11	98922545	98923626	39.27
chr11	98929267	98930124	6.9
chr11	99042579	99043555	53.2
chr11	99046656	99047797	94.2
chr11	99055319	99056445	38.66
chr11	99095608	99097680	174.39
chr11	99131767	99133139	156.84
chr11	99133209	99134258	27.58
chr11	99134427	99135259	11.2
chr11	99147509	99148581	20.49
chr11	99148863	99150132	12.87
chr11	99229895	99231204	17.29
chr11	100819834	100820551	10.15
chr11	101149090	101150267	17.25
chr11	101155689	101156760	17.07
chr11	101171938	101172828	20.51
chr11	101189614	101190571	9.73
chr11	101231087	101232773	54.31
chr11	101244627	101245758	22.82
chr11	101334175	101335145	17.66
chr11	101348918	101349928	33.7
chr11	101350680	101352178	45.8
chr11	101442092	101442862	11.53
chr11	101480551	101481621	38.22
chr11	101627084	101628233	12.12
chr11	101691767	101692888	15.64
chr11	101815233	101816340	21.91
chr11	101867214	101868312	47.46
chr11	101873975	101875748	29.32
chr11	102138211	102139035	19.62
chr11	102165867	102166981	37.6
chr11	102199540	102200554	86.54
chr11	102218329	102219362	13.16
chr11	102226908	102228285	23.85
chr11	102295725	102297185	10.22
chr11	102316619	102318449	8.79
chr11	102429956	102431582	29.13
chr11	102595182	102596905	9.17
chr11	102603886	102604702	10.66
chr11	102623528	102625464	122.78
chr11	103266290	103268150	20.18
chr11	103697497	103698491	22.93
chr11	104040236	104041366	44.99
chr11	104303132	104303955	17.66
chr11	104319005	104320128	27.52
chr11	104441351	104442598	12.31
chr11	104616148	104617286	25.35
chr11	105152956	105154399	54.19
chr11	105181014	105182623	10.69
chr11	105292076	105293697	15.28
chr11	105312223	105314194	48.84
chr11	105364684	105365497	17.62
chr11	105504581	105505535	14.11
chr11	105523567	105524599	21.47
chr11	106215897	106216957	9.78
chr11	106267933	106269579	18.07
chr11	106318343	106319200	22.84
chr11	106438552	106439680	17.85
chr11	106555713	106556631	49.85
chr11	106609543	106610283	10.25
chr11	106998182	107000294	43.34
chr11	107131238	107132295	11.72
chr11	107470237	107472328	12.71
chr11	107629231	107630221	11.65
chr11	107683707	107684792	39.38
chr11	108302113	108303145	17.75
chr11	108585948	108587251	100.79
chr11	108620288	108621597	11.14
chr11	108796060	108796814	20.74
chr11	108920022	108921616	14.38
chr11	108946671	108948423	31.76
chr11	109011294	109012505	18.78
chr11	109040751	109041785	13.43
chr11	109080656	109081631	16.99
chr11	109242473	109243300	12.71
chr11	109269479	109270946	151.11
chr11	109472947	109474276	10.37
chr11	109582664	109583726	31.68
chr11	109593179	109594197	94.04
chr11	109622491	109623556	24.03
chr11	109900080	109901291	41.65
chr11	109909259	109910163	14.93
chr11	110303309	110304396	12.2
chr11	110649221	110650275	61.92
chr11	110899368	110900148	10.59
chr11	110956487	110957247	22.92
chr11	111008904	111010130	72.34
chr11	111132270	111133160	12
chr11	111568533	111569659	21.23
chr11	111747018	111748262	16.48
chr11	111820036	111821062	22.21
chr11	111843526	111844524	19.95
chr11	111872854	111873771	11.62
chr11	112027702	112028596	19.9
chr11	112079301	112080257	16
chr11	112096649	112097174	10.27
chr11	112137116	112138495	74.05
chr11	112206412	112207336	31.94
chr11	112413838	112414517	10.28
chr11	112449945	112451014	66.76
chr11	112518080	112518807	6.54
chr11	112736699	112737540	17.77
chr11	112826639	112827657	7.32
chr11	113014012	113015268	27.75
chr11	113164851	113165691	11.53
chr11	113654510	113655512	11.41
chr11	113785156	113786214	26.63
chr11	113806395	113807735	40.33
chr11	113883565	113884581	7.75
chr11	114027794	114029148	28.72
chr11	114040141	114041464	32.41
chr11	114145948	114147060	41.82
chr11	114239027	114240025	14.35
chr11	114379484	114380274	10.45
chr11	114446471	114447275	12.08
chr11	114638698	114640216	41.76
chr11	114684720	114685667	18.13
chr11	114814686	114815733	35
chr11	114829843	114830909	60.11
chr11	115063216	115063974	22.97
chr11	115099170	115100139	10.07
chr11	115100712	115101884	25.65
chr11	115381287	115382635	60.15
chr11	115466947	115467917	28.12
chr11	115512614	115514562	42.84
chr11	115832290	115833424	15.54
chr11	115937769	115938533	13.94
chr11	116023604	116024679	9.78
chr11	116241582	116243300	41.62
chr11	116243879	116244786	19.31
chr11	116417860	116418936	14.72
chr11	116583532	116584280	24.1
chr11	116585400	116586514	13.23
chr11	116609570	116610603	14.38
chr11	116645079	116646121	56.95
chr11	116697975	116698875	9.94
chr11	116857115	116858030	15.86
chr11	117265669	117266882	22.25
chr11	117278042	117279183	17.65
chr11	117317556	117319131	75.3
chr11	117369919	117371050	34.94
chr11	117384659	117385979	10.51
chr11	117389846	117390891	17.56
chr11	117407394	117408416	133.57
chr11	117418203	117419686	37.22
chr11	117425463	117426422	12.97
chr11	117453844	117455129	21.24
chr11	117780068	117781121	50.12
chr11	117797914	117798807	11.25
chr11	117962961	117964159	235.36
chr11	118236499	118237322	54.46
chr11	118238818	118239791	15.89
chr11	118362956	118363795	15.26
chr11	118447086	118448076	13.65
chr11	118458854	118459791	43.72
chr11	118469817	118470628	65.53
chr11	118897995	118899030	28.19
chr11	119088888	119089925	14.49
chr11	119211431	119212688	167.03
chr11	119228185	119229628	13.9
chr11	119660953	119662080	86.97
chr11	119883274	119884406	33.78
chr11	120029212	120030244	11.14
chr11	120033939	120034611	8.79
chr11	120050920	120051926	11.22
chr11	120114625	120115644	48.73
chr11	120163767	120165458	239.82
chr11	120170856	120172001	18.32
chr11	120189349	120190393	8.44
chr11	120224983	120226098	17.02
chr11	120241076	120242124	12.97
chr11	120261758	120262986	17.43
chr11	120579444	120580340	41.61
chr11	120694903	120696330	100.54
chr11	120697382	120698381	11.13
chr11	120704454	120705693	12.67
chr11	120823667	120826147	26.24
chr11	121203909	121204850	15.4
chr11	121646936	121647751	16.53
chr11	121847490	121848492	13.32
chr12	3109415	3110422	54.37
chr12	3779248	3780274	43.51
chr12	3787281	3788813	52.49
chr12	3849923	3851372	23.01
chr12	4283343	4284219	11.01
chr12	4312852	4313900	13.8
chr12	5191553	5192704	24.15
chr12	5197885	5198935	29.85
chr12	5207835	5208991	31.42
chr12	5238896	5240425	81.54
chr12	5247108	5248028	11.46
chr12	6254847	6255630	10.55
chr12	7611322	7612089	36.22
chr12	7738659	7739457	16.16
chr12	8063337	8064249	10.73
chr12	8364024	8364925	10.9
chr12	8451484	8452425	10.22
chr12	8817268	8818437	10.98
chr12	8855603	8856909	21.96
chr12	8864693	8865838	111
chr12	8921015	8922230	16.46
chr12	9029976	9031154	76.97
[truncated: 8,821 more rows]

## Sheet: H3K27ac
Chrom	Start	End	-log10(pvalue)
chr1	3670600	3672599	79.35
chr1	4491600	4493999	175.11
chr1	4496200	4497999	21.57
chr1	4570800	4572399	310.17
chr1	4784400	4786599	310.17
chr1	4807200	4808799	310.17
chr1	4855600	4859799	310.17
chr1	5018000	5021199	176.7
chr1	5082600	5083799	310.17
chr1	5588200	5589399	41.75
chr1	5916000	5917999	26.25
chr1	6213800	6215799	310.17
chr1	6358800	6359799	107.38
chr1	6382600	6383399	189.11
chr1	6440800	6441799	292.72
chr1	7087800	7090199	310.17
chr1	7206200	7208199	22.82
chr1	7308000	7310999	8.47
chr1	7397000	7398999	310.17
chr1	7774800	7780599	124.1
chr1	9298600	9300199	20.93
chr1	9544600	9550999	310.17
chr1	9609400	9610399	11.13
chr1	9626600	9633999	10.66
chr1	9648600	9651199	11.29
chr1	9699400	9701399	310.17
chr1	9747000	9749199	310.17
chr1	9768400	9770399	66.57
chr1	9797400	9801399	310.17
chr1	9847800	9848999	83.69
chr1	9942200	9944799	310.17
chr1	9967000	9968599	127.86
chr1	10008600	10009799	15.28
chr1	10037200	10040799	310.17
chr1	10231600	10233999	310.17
chr1	10258800	10261799	15.98
chr1	10284600	10286799	38.32
chr1	10695000	10696799	11.78
chr1	10993000	10995599	310.17
chr1	11024800	11027599	11.42
chr1	11295200	11296199	15.57
chr1	11327800	11331199	86.88
chr1	11413600	11414999	122.71
chr1	12397200	12398999	12.57
chr1	12576800	12580799	28.17
chr1	12688800	12693799	126.58
chr1	12710800	12719199	56.55
chr1	12789200	12800199	18.48
chr1	12805200	12812199	9.69
chr1	12831600	12842799	105.12
chr1	12990200	12992999	310.17
chr1	13103600	13105599	10.51
chr1	13174200	13176999	13.11
chr1	13184000	13207599	10.98
chr1	13287400	13292799	14.19
chr1	13321800	13327799	18.36
chr1	13363400	13374999	310.17
chr1	13425800	13429599	58.41
chr1	13587600	13590399	310.17
chr1	13659600	13663199	310.17
chr1	13769800	13774199	12.03
chr1	13857200	13864799	13.96
chr1	14135200	14141399	10.31
chr1	14180000	14189399	21.22
chr1	14304600	14310799	310.17
chr1	14464200	14465999	22.99
chr1	14503000	14509199	283.43
chr1	14753800	14757999	137.34
chr1	15286000	15287799	310.17
chr1	15805000	15806799	310.17
chr1	15891400	15893399	282.29
chr1	16092600	16093599	217.53
chr1	16102800	16109599	310.17
chr1	16226800	16231799	25.71
chr1	16245800	16254799	71.43
chr1	16264000	16269999	21.81
chr1	16518200	16520599	310.17
chr1	16617600	16619999	310.17
chr1	16654600	16657999	310.17
chr1	16664800	16666799	310.17
chr1	16686000	16689799	133.95
chr1	17096600	17099399	310.17
chr1	17449400	17451399	23.64
chr1	17726600	17728599	310.17
chr1	18057800	18059199	220.01
chr1	19208800	19215199	137.38
chr1	19240800	19242199	11.04
chr1	20477400	20478399	16.25
chr1	20816600	20822399	310.17
chr1	20889200	20891999	281.25
chr1	20950800	20953199	286.93
chr1	20989600	21011999	49.67
chr1	21036200	21046599	14.96
chr1	21049400	21054399	15.42
chr1	21069400	21080599	310.17
chr1	21088600	21091999	15.17
chr1	21165200	21167199	17.05
chr1	21173800	21174999	12.48
chr1	21218200	21219599	232.93
chr1	21960400	21963599	310.17
chr1	22533000	22534399	296.4
chr1	22805200	22806599	305.89
chr1	23255600	23257599	310.17
chr1	23382000	23384199	310.17
chr1	23761200	23764199	155.07
chr1	23920400	23922799	310.17
chr1	23958600	23959799	36.53
chr1	24005000	24006199	254.98
chr1	24099000	24101399	310.17
chr1	24193400	24198999	144.86
chr1	24586200	24587599	129.8
chr1	24678000	24679799	310.17
chr1	24698200	24701999	10.43
chr1	24704800	24709799	10.42
chr1	25829000	25830999	310.17
chr1	28089800	28090799	30.03
chr1	30719800	30722799	27.27
chr1	30872400	30876199	310.17
chr1	30947000	30950799	310.17
chr1	31147200	31151599	31.08
chr1	31164400	31165399	10.7
chr1	32172200	32173399	54.13
chr1	32834200	32836399	10.86
chr1	33459200	33471599	38.79
chr1	33588200	33596599	22.27
chr1	33669200	33670999	308.77
chr1	33680400	33681599	10.57
chr1	33719400	33722399	310.17
chr1	33753400	33759799	310.17
chr1	33812800	33815399	310.17
chr1	33906200	33908999	310.17
chr1	33965600	33972599	34.94
chr1	34004800	34007999	122.38
chr1	34011000	34012399	310.17
chr1	34020200	34021599	22.98
chr1	34062400	34065799	7.87
chr1	34072400	34077599	13.91
chr1	34102600	34111399	28.76
chr1	34117000	34122399	17.05
chr1	34139200	34153999	27.38
chr1	34177400	34186399	30.02
chr1	34187000	34194199	11.63
chr1	34202400	34207999	12.7
chr1	34219400	34225999	13.14
chr1	34235200	34239399	55.96
chr1	34431400	34436199	310.17
chr1	34438600	34444599	259.21
chr1	34459000	34460399	73.09
chr1	34470200	34474599	94.71
chr1	34510400	34512199	25.7
chr1	34578800	34580399	11.94
chr1	34633000	34637799	26.76
chr1	34677800	34679599	44.15
chr1	34721600	34725599	32.47
chr1	34748800	34751799	209.45
chr1	34797400	34818199	124.09
chr1	34839200	34843799	310.17
chr1	34849600	34853399	153.36
chr1	34857600	34866399	15.93
chr1	35257600	35261199	10.19
chr1	35467400	35472399	9.73
chr1	35761400	35763799	11.75
chr1	35805200	35816399	27.75
chr1	35820000	35828599	31.68
chr1	35923400	35936799	12.42
chr1	35938000	35946199	13.26
chr1	35951200	35962599	15.92
chr1	35971200	35974999	7.75
chr1	35991800	36009199	79.39
chr1	36010400	36021599	137.31
chr1	36029200	36031399	30.13
chr1	36057200	36106599	310.17
chr1	36112800	36144799	33.27
chr1	36159600	36163599	14.11
chr1	36241800	36247199	310.17
chr1	36253800	36258799	11.24
chr1	36268000	36275999	191.23
chr1	36295600	36305399	19.87
chr1	36307400	36329599	157.06
chr1	36366600	36370999	310.17
chr1	36401400	36404999	11.41
chr1	36406400	36421399	35.29
chr1	36444400	36446599	310.17
chr1	36466800	36527999	310.17
chr1	36529800	36544199	93.05
chr1	36545800	36597599	310.17
chr1	36599200	36615999	55.43
chr1	36625200	36651799	69.61
chr1	36664200	36667799	10.4
chr1	36669200	36676999	9.82
chr1	36679000	36686199	23.03
chr1	36689600	36692599	286.02
chr1	36695600	36710399	249.84
chr1	36715200	36725999	22.72
chr1	36753600	36768799	36.98
chr1	36770600	36772999	42.4
chr1	36777000	36783599	43.26
chr1	36784800	36786199	27.07
chr1	36789200	36801799	22.88
chr1	36830000	36833199	23.84
chr1	36851400	36857399	15.45
chr1	36859400	36864999	24.41
chr1	36900600	36905799	15.35
chr1	36915200	36926999	12.92
chr1	36937400	36941999	310.17
chr1	37028600	37029999	27.71
chr1	37087600	37092199	10.96
chr1	37120600	37127599	32.56
chr1	37186200	37188399	17.23
chr1	37299400	37301199	292.09
chr1	37333600	37338999	10.29
chr1	37362800	37369599	22.66
chr1	37370800	37384599	57.48
chr1	37386200	37403399	45
chr1	37408800	37413599	13.46
chr1	37429000	37434399	310.17
chr1	37488600	37493199	12.54
chr1	37503800	37506199	31.57
chr1	37540200	37541599	310.17
chr1	37551200	37552799	21.87
chr1	37606600	37629199	43.17
chr1	37665200	37666599	15.81
chr1	37694400	37700599	55.5
chr1	37718000	37720599	235.72
chr1	37864200	37866199	310.17
chr1	37869800	37872999	52.97
chr1	37887600	37891399	99.42
chr1	37995000	37999399	310.17
chr1	38126400	38131599	310.17
chr1	38198400	38222599	70.32
chr1	38231800	38252399	17.68
chr1	38265800	38274999	13.21
chr1	38303800	38310799	15.52
chr1	38355400	38359999	13.09
chr1	38387400	38395999	22.84
chr1	38397200	38404999	18.95
chr1	38432000	38443999	44.18
chr1	38445800	38452399	23.89
chr1	38487600	38493799	10.14
chr1	38495200	38504399	40.67
chr1	38505600	38516999	46.07
chr1	38541400	38551399	31.62
chr1	38560600	38566999	33.01
chr1	38599800	38608199	36.42
chr1	38613400	38617599	10.03
chr1	38626000	38638199	310.17
chr1	38646800	38653999	7.66
chr1	38656200	38670199	10.27
chr1	38755600	38761999	38.18
chr1	38763200	38774199	98.33
chr1	38779600	38788599	13.1
chr1	38789800	38792799	10.55
chr1	38835600	38836999	310.17
chr1	38863200	38874199	10.48
chr1	38897200	38899799	227.13
chr1	38986800	38992999	271.73
chr1	39045000	39047599	30.28
chr1	39103400	39107799	10.37
chr1	39177400	39180199	10.38
chr1	39192000	39194799	265.28
chr1	39366800	39372799	310.17
chr1	39376400	39413799	39.8
chr1	39417600	39424599	20.09
chr1	39438400	39458599	48.43
chr1	39477200	39483199	310.17
chr1	39532600	39538399	310.17
chr1	39575600	39579999	310.17
chr1	39650000	39652199	60.71
chr1	39670200	39674999	25.71
chr1	39676200	39721799	211.26
chr1	39728200	39744999	26.56
chr1	39746600	39752799	22.48
chr1	39754400	39768799	31.47
chr1	39770600	39774799	30.51
chr1	39862200	39872199	47.1
chr1	39899800	39907199	310.17
chr1	39921400	39962399	47.91
chr1	39968000	39970799	7.96
chr1	39998600	40004999	16.4
chr1	40070800	40075599	16.14
chr1	40084800	40086199	21.78
chr1	40221400	40225199	10.09
chr1	40264000	40268999	112.79
chr1	40324400	40326599	30.58
chr1	40680400	40682399	117.85
chr1	40789800	40791399	78.35
chr1	41032800	41037999	10.46
chr1	41157200	41159199	10.82
chr1	41274800	41278199	25.83
chr1	41386400	41391399	15.56
chr1	41890800	41891799	10.91
chr1	42241400	42244399	41.88
chr1	42257000	42262999	29.05
chr1	42414600	42418199	10.27
chr1	42489800	42492999	125.68
chr1	42538600	42543399	13.91
chr1	42684200	42687599	272.38
chr1	42692200	42699799	310.17
chr1	42711600	42714999	92.19
chr1	42850800	42852399	310.17
chr1	42950000	42954799	310.17
chr1	43044000	43054599	20.19
chr1	43090600	43093399	310.17
chr1	43097200	43100199	310.17
chr1	43163000	43164999	292.67
chr1	43196200	43198599	12.14
chr1	43357400	43365199	58.49
chr1	43443600	43449599	310.17
chr1	43462800	43472599	8.08
chr1	43473800	43475799	24.64
chr1	43519000	43538599	12.52
chr1	43539800	43556799	18.82
chr1	43729600	43731199	20.88
chr1	43823600	43828599	310.17
chr1	43882000	43883199	19.9
chr1	43931800	43935799	310.17
chr1	44040800	44042799	82.31
chr1	44101000	44103599	310.17
chr1	44117600	44120799	310.17
chr1	44147000	44148799	310.17
chr1	44550000	44555799	310.17
chr1	44618000	44619799	11.95
chr1	44678200	44683999	23.05
chr1	45090000	45092799	10.17
chr1	45311000	45316999	193.12
chr1	45501400	45503999	197.44
chr1	45759200	45769799	112.7
chr1	45794400	45797399	310.17
chr1	45863800	45870199	28.23
chr1	45904000	45906599	11.3
chr1	45925000	45926599	127.42
chr1	46066000	46067599	310.17
chr1	46271000	46272399	17.86
chr1	46425200	46425999	58.92
chr1	46851200	46854999	310.17
chr1	46885000	46890199	33.18
chr1	46892800	46895199	14.03
chr1	50926400	50928999	104.1
chr1	51288600	51290199	23.62
chr1	51331000	51334799	15.17
chr1	51477400	51479199	293.34
chr1	51645800	51651799	12.52
chr1	51687600	51691799	10.39
chr1	51695000	51699799	40.3
chr1	51878000	51883599	34.78
chr1	51896000	51897799	19.8
chr1	51913200	51916399	310.17
chr1	52024600	52026399	10.31
chr1	52045800	52048799	18.5
chr1	52110800	52114199	86.25
chr1	52118600	52120799	149.49
chr1	52136400	52159799	25.92
chr1	52231600	52233999	310.17
chr1	52499400	52501199	310.17
chr1	52518600	52521799	10.04
chr1	52576200	52581999	56.14
chr1	52629800	52632199	310.17
chr1	52647200	52653599	17
chr1	52726400	52727799	310.17
chr1	52817000	52818199	310.17
chr1	52844200	52847799	105.25
chr1	52952200	52955199	134.57
chr1	53058800	53063599	12.57
chr1	53178800	53180599	39.62
chr1	53199800	53203799	23.62
chr1	53296200	53297999	310.17
chr1	53313200	53314399	187.32
chr1	53351800	53353199	310.17
chr1	53388600	53389599	19.27
chr1	53706000	53707199	142.07
chr1	53784200	53785799	310.17
chr1	53823400	53825399	14.24
chr1	53976000	53978799	25.01
chr1	53980400	53984399	10.49
chr1	54009600	54012799	12.01
chr1	54193000	54195399	310.17
chr1	54250000	54251799	133.61
chr1	54438200	54439399	310.17
chr1	54556800	54558799	310.17
chr1	54802800	54804999	17.55
chr1	54864200	54869399	14.29
chr1	54899200	54919199	71.91
chr1	54924000	54926999	310.17
chr1	54959200	54962799	27.17
chr1	54964200	54975399	28.37
chr1	55025600	55031399	310.17
chr1	55052000	55053599	310.17
chr1	55084000	55090199	310.17
chr1	55129600	55132599	310.17
chr1	55171000	55174999	34.32
chr1	55190000	55199599	52.05
chr1	55200800	55228399	107.35
chr1	55235200	55238999	294.57
chr1	55362400	55363999	50.11
chr1	55405400	55407199	232.02
chr1	56969200	56973999	310.17
chr1	57095400	57097599	55.49
chr1	57376800	57378599	310.17
chr1	57405400	57408599	310.17
chr1	57424000	57434799	10.01
chr1	57475600	57480999	19.01
chr1	57581400	57583999	16.51
chr1	57612400	57613799	15.53
chr1	57773800	57775999	310.17
chr1	57805000	57810999	38.76
chr1	57866200	57871399	13.95
chr1	57955600	57957599	16.47
chr1	57969200	57970599	310.17
chr1	57995400	57998399	310.17
chr1	58029400	58033999	33.78
chr1	58153800	58154999	11.79
chr1	58208200	58218199	8.5
chr1	58275800	58281399	19.99
chr1	58302000	58308399	15.41
chr1	58332600	58333599	11.99
chr1	58391400	58395199	310.17
chr1	58422400	58424599	310.17
chr1	58443800	58449599	310.17
chr1	58503000	58505599	310.17
chr1	58585400	58587199	310.17
chr1	58652400	58653199	219.36
chr1	58710800	58715199	310.17
chr1	58794400	58796399	235.25
chr1	58823000	58828999	15.62
chr1	58902000	58904199	15.75
chr1	58949400	58965199	38.12
chr1	58972400	58974399	310.17
chr1	59119200	59120999	310.17
chr1	59236600	59238199	310.17
chr1	59256400	59258199	17.15
chr1	59268800	59273999	41.23
chr1	59309200	59345199	258.43
chr1	59366600	59369799	17.64
chr1	59371000	59384599	39.67
chr1	59385800	59410799	76.4
chr1	59412000	59428999	114.35
chr1	59432800	59440999	59.55
chr1	59443000	59452799	94
chr1	59456200	59478199	56.43
chr1	59479600	59489599	310.17
chr1	59491600	59494199	12.16
chr1	59502600	59509799	16.12
chr1	59515200	59524799	185.2
chr1	59540200	59542399	11.86
chr1	59573600	59586199	33.53
chr1	59590200	59593799	10.63
chr1	59632000	59634399	10.78
chr1	59668600	59671599	310.17
chr1	59682800	59686799	240.04
chr1	59761000	59765399	310.17
chr1	59912200	59914999	310.17
chr1	59926000	59927399	13.44
chr1	60003800	60004599	22.21
chr1	60042400	60043799	310.17
chr1	60096600	60099199	310.17
chr1	60178600	60181599	310.17
chr1	60340000	60346399	310.17
chr1	60407400	60410799	310.17
chr1	60488200	60491199	57.32
chr1	60565000	60567799	310.17
chr1	61138000	61147599	81.07
chr1	61296600	61303399	14.25
chr1	61372600	61381599	7.39
chr1	61404600	61408599	8.72
chr1	61638200	61639999	310.17
chr1	61925600	61928199	15.05
chr1	62013400	62021399	33.6
chr1	62180400	62182599	14.52
chr1	62382800	62384199	19.94
chr1	62635200	62640999	13.38
chr1	62642600	62649799	65.24
chr1	62664400	62666599	35.99
chr1	62695600	62710799	310.17
chr1	62715200	62730399	59.07
chr1	62736600	62755799	21.61
chr1	62758800	62796799	86.84
chr1	62798000	62819599	22.87
chr1	62821200	62823999	14.48
chr1	62826200	62828399	14.38
chr1	62848400	62854799	27.12
chr1	62859200	62861999	10.68
chr1	62883200	62889199	16.96
chr1	63057600	63059399	23.03
chr1	63106400	63116999	310.17
chr1	63128000	63131999	10.79
chr1	63175200	63178799	310.17
chr1	63203000	63205199	52.07
chr1	63247000	63250199	117.26
chr1	63272400	63274199	310.17
chr1	63445000	63446799	310.17
chr1	63570800	63582199	13.41
chr1	63729800	63731599	94.58
chr1	63765800	63769399	11.54
chr1	63944800	63946199	11.45
chr1	63992600	63996399	28.62
chr1	64011800	64013799	12.84
chr1	64018200	64021799	31.97
chr1	64033800	64041599	9.45
chr1	64078200	64079399	33.9
chr1	64087000	64091799	10.04
chr1	64117800	64123199	310.17
chr1	64189400	64194799	9.97
chr1	64301200	64305999	38.14
chr1	64444600	64447599	10.01
chr1	64530600	64534399	310.17
chr1	64614000	64627599	310.17
chr1	64689600	64692399	310.17
chr1	64734000	64739199	261.91
chr1	64781800	64798399	17.75
chr1	64882800	64885199	20.31
chr1	64921600	64925999	11.63
chr1	64956000	64957599	310.17
chr1	65073000	65074999	10.62
chr1	65177800	65179999	310.17
chr1	65185200	65189999	310.17
chr1	65311000	65311999	29.67
chr1	66173600	66176599	236
chr1	66320800	66322399	16.09
chr1	66467800	66468799	37.67
chr1	66700400	66701799	310.17
chr1	66815000	66818199	310.17
chr1	66862600	66863599	310.17
chr1	67009600	67012399	13.03
chr1	67037400	67039999	200.94
chr1	69105200	69108399	98.37
chr1	69376800	69378599	22.08
chr1	69591400	69593599	16.59
chr1	69684600	69688399	310.17
chr1	69728000	69729999	11.38
chr1	69731400	69732399	20.56
chr1	69826600	69827399	158.62
chr1	71101800	71103999	310.17
chr1	71556600	71558599	310.17
chr1	71649200	71654399	310.17
chr1	71835800	71847399	39.94
chr1	71854000	71857399	15.08
chr1	71862000	71866599	17.13
chr1	71880400	71888799	10.17
chr1	71890200	71901199	23.49
chr1	71935200	71946799	19.48
chr1	71999800	72009799	18.79
chr1	72029400	72033799	8.1
chr1	72138400	72143399	10.22
chr1	72193400	72199999	23.05
chr1	72210800	72212799	310.17
chr1	72224000	72226599	116.09
chr1	72233000	72234599	11.6
chr1	72236000	72238599	180.98
chr1	72243400	72244599	310.17
chr1	72254000	72259999	253.57
chr1	72283400	72288399	148.05
chr1	72305000	72312999	237.33
chr1	72388600	72404199	14.2
chr1	72427200	72430399	17.91
chr1	72503800	72507799	10.72
chr1	72575600	72580199	38.99
chr1	72581800	72587999	98.08
chr1	72589400	72593999	11.45
chr1	72595800	72602399	16.96
chr1	72606000	72614799	18.38
chr1	72710800	72713599	310.17
chr1	72719000	72722999	12.34
chr1	72727600	72748999	19.65
chr1	72804000	72807799	42.2
chr1	72812400	72816999	44.86
chr1	72821600	72830799	310.17
chr1	72832400	72835599	13.01
chr1	72847000	72850399	22.17
chr1	72851400	72881999	310.17
chr1	72897200	72898799	16.27
chr1	72942200	72974599	122.87
chr1	73013800	73021199	9.96
chr1	73034600	73057399	45.5
chr1	73059000	73067199	9.77
chr1	73070400	73080799	19.15
chr1	73088400	73090399	19.17
chr1	73104600	73126399	15.91
chr1	73152800	73160799	8.02
chr1	73167400	73171199	32.92
chr1	73198400	73200599	13.66
chr1	73216600	73224799	7.52
chr1	73250000	73252999	12.84
chr1	73268800	73273399	12.64
chr1	73303000	73314999	16.53
chr1	73361200	73370199	110.66
chr1	73376800	73382599	24.22
chr1	73389600	73402199	20.12
chr1	73478800	73482799	10.75
chr1	73503800	73507999	15.06
chr1	73537400	73539799	28.75
chr1	73543800	73548399	10.11
chr1	73700800	73704399	22.94
chr1	73717000	73718599	10.56
chr1	73737200	73738199	13.13
chr1	73743200	73749799	47.9
chr1	73754400	73760599	33.13
chr1	73822200	73832599	130.13
chr1	73850800	73864599	83.21
chr1	73901600	73981599	310.17
chr1	73982800	74062799	310.17
chr1	74064000	74113999	310.17
chr1	74118000	74126399	141.16
chr1	74127800	74131399	16.15
chr1	74235800	74241399	310.17
chr1	74271000	74304599	310.17
chr1	74326000	74358199	147.94
chr1	74360400	74372799	41.95
chr1	74374800	74399199	310.17
chr1	74407200	74416599	62.92
chr1	74418200	74435999	29.05
chr1	74503400	74508999	310.17
chr1	74569600	74572599	13.55
chr1	74586800	74591999	310.17
chr1	74600600	74603399	165.9
chr1	74625400	74628799	15.33
chr1	74661000	74663599	310.17
chr1	74712400	74719799	276.64
chr1	74735000	74737799	13.13
chr1	74743600	74749599	14.34
chr1	74767000	74784999	238.17
chr1	74787600	74795799	97.65
chr1	74799400	74808799	104.96
chr1	74815200	74823199	226.47
chr1	74854200	74856799	137.79
chr1	74881200	74886799	74.39
chr1	74895800	74905399	24
chr1	74945800	74952399	79.03
chr1	74962200	74969799	65.3
chr1	74975400	74980399	14.61
chr1	75124000	75129799	310.17
chr1	75135200	75147999	310.17
chr1	75167800	75188399	310.17
chr1	75190000	75193599	310.17
chr1	75208200	75216199	290.81
chr1	75218000	75220199	84.24
chr1	75234600	75258799	310.17
chr1	75308400	75322599	310.17
chr1	75335000	75350399	310.17
chr1	75353600	75368199	191.39
chr1	75369400	75396999	310.17
chr1	75398200	75460599	310.17
chr1	75462200	75480399	310.17
chr1	75481800	75513799	310.17
chr1	75516400	75522199	153.65
chr1	75523800	75541399	64.93
chr1	75544400	75562799	310.17
chr1	75610600	75613799	10.3
chr1	75652800	75664799	20.83
chr1	75768200	75783399	8.43
chr1	75802000	75806599	14.55
chr1	75826400	75836999	11.21
chr1	75839400	75849999	37.97
chr1	75887000	75893199	25.04
chr1	76008800	76013199	10.77
chr1	76021200	76032999	12.31
chr1	76128600	76134199	19.37
chr1	76144800	76146199	10.62
chr1	76528800	76531799	13.74
chr1	76863600	76868799	16.47
chr1	76895400	76898999	87.29
chr1	76904200	76909799	13.08
chr1	76970600	76977399	21.79
chr1	77080800	77085599	19.41
chr1	77224400	77228199	10.87
chr1	77253400	77259999	10.48
chr1	77337000	77342399	15.13
chr1	77494000	77498999	16.45
chr1	77511000	77517799	310.17
chr1	78188800	78204199	116.1
chr1	78215800	78218599	116.83
chr1	78301600	78302599	12.22
chr1	78309400	78312199	88.12
chr1	78487600	78490599	310.17
chr1	78510000	78512399	48.98
chr1	78534800	78538199	12.51
chr1	78587400	78588999	32.81
chr1	78641400	78651199	11.91
chr1	78655400	78661799	310.17
chr1	78811800	78822999	15.78
chr1	78850800	78853799	14.83
chr1	79670800	79674399	64.31
chr1	79758800	79763399	310.17
chr1	79775400	79776799	310.17
chr1	79853400	79862599	310.17
chr1	79976000	79984999	13.77
chr1	80211400	80214199	20.55
chr1	80338400	80341799	310.17
chr1	80756800	80759199	310.17
chr1	81241000	81242199	12.64
chr1	81592800	81597799	96.91
chr1	81605200	81610999	29.12
chr1	81744200	81747199	30.48
chr1	82128200	82137199	11.37
chr1	82219800	82225799	12.29
chr1	82272600	82276399	11.59
chr1	82282600	82293399	310.17
chr1	82316000	82317599	310.17
chr1	82358400	82362399	10.03
chr1	82366800	82375599	21.27
chr1	82383200	82386999	13.29
chr1	82406800	82417799	20.89
chr1	82427400	82435999	9.15
chr1	82440000	82443799	16.23
chr1	82586400	82587599	45.93
chr1	82724400	82726199	310.17
chr1	82770800	82773399	29.76
chr1	82838800	82840799	310.17
chr1	83038000	83038799	60.11
chr1	83058400	83061599	21.46
chr1	83159400	83163399	95.76
chr1	83407400	83408599	30.48
chr1	83861600	83863799	16.82
chr1	84225800	84226999	19.07
chr1	84283400	84285199	165.16
chr1	84403600	84405999	14.68
chr1	84694800	84696399	22.65
chr1	84837600	84841599	310.17
chr1	84881600	84883799	10.46
chr1	84934000	84935399	275.32
chr1	85680000	85682199	10.83
chr1	85702400	85704199	24.67
chr1	85718000	85724399	11.04
chr1	85735000	85736799	30.14
chr1	85749000	85754999	37.95
chr1	85757400	85759199	20.71
chr1	85792800	85795599	310.17
chr1	85891600	85909399	310.17
chr1	85931000	85943799	83.13
chr1	85955600	85961399	10.84
chr1	86016400	86019199	82.32
chr1	86045600	86047199	249.83
chr1	86059000	86060399	26.95
chr1	86064000	86065799	310.17
chr1	86140600	86156599	183.85
chr1	86225400	86253599	20.22
chr1	86255200	86264399	20.87
chr1	86268800	86286799	41.1
chr1	86300200	86311799	110.64
chr1	86356600	86362999	310.17
chr1	86378400	86382999	13.01
chr1	86384600	86400799	31.94
chr1	86414000	86444799	310.17
chr1	86446000	86455399	25.68
chr1	86463800	86465999	90.47
chr1	86467000	86473399	100.48
chr1	86477200	86484599	14.62
chr1	86485600	86494599	310.17
chr1	86495800	86517199	310.17
chr1	86518400	86533599	310.17
chr1	86581400	86583399	310.17
chr1	86586600	86587999	276.46
chr1	86627400	86634599	17.16
chr1	86651600	86655999	26.97
chr1	86663200	86671199	66.26
chr1	86672800	86678999	11.54
chr1	86703000	86706799	310.17
chr1	86832400	86835599	12.05
chr1	86967800	86969599	11.02
chr1	87028600	87042799	190.47
chr1	87042800	87055999	45.42
chr1	87064400	87069199	11.97
chr1	87084600	87090599	11.97
chr1	87152800	87156599	62.59
chr1	87167600	87177999	63.66
chr1	87180000	87193399	99.5
chr1	87204000	87211599	22.83
chr1	87212800	87217199	310.17
chr1	87263800	87265399	101.75
chr1	87267200	87285399	25.99
chr1	87326400	87328399	310.17
chr1	87467600	87473199	22.04
chr1	87474400	87489799	40.19
chr1	87509200	87510999	233.85
chr1	87550000	87556199	18.46
chr1	87619200	87627399	58.04
chr1	87634800	87646199	21.52
chr1	87656400	87662399	22.76
chr1	87714600	87724599	10.79
chr1	87755400	87758199	310.17
chr1	87836400	87838399	27.71
chr1	87845000	87856799	310.17
chr1	87870000	87881399	21.02
chr1	87923400	87927999	12.66
chr1	87933200	87939799	15.43
chr1	87960000	87964199	11.71
chr1	88007600	88009999	310.17
chr1	88205000	88206199	269.74
chr1	88230000	88287399	13.14
chr1	88385400	88386399	11.35
chr1	88451000	88480999	58.29
chr1	88485400	88495199	9.33
chr1	88524600	88526399	13.1
chr1	88558800	88561399	8.22
chr1	88600000	88602799	7.91
chr1	88604000	88613999	46.14
chr1	88616000	88636599	28.33
chr1	88637800	88643399	25.76
chr1	88690000	88694799	14.97
chr1	88696600	88709999	310.17
chr1	88741200	88759399	24.07
chr1	88760200	88761599	12.63
chr1	88769000	88776399	10.53
chr1	88777400	88787199	16.16
chr1	88798200	88801199	14.83
chr1	88807200	88811799	11.2
chr1	88836200	88841399	23.17
chr1	88863800	88882199	29.49
chr1	88921400	88926599	34.18
chr1	89038400	89044399	13.35
chr1	89067400	89096799	310.17
chr1	89102200	89125999	310.17
chr1	89127600	89157799	132.94
chr1	89162400	89198399	47.79
chr1	89244400	89245999	10.27
chr1	89297800	89303599	14.21
chr1	89452400	89458599	310.17
chr1	89459800	89463599	16.69
chr1	89464600	89506799	160.03
chr1	89508600	89531799	75.73
chr1	89533000	89544199	26.7
chr1	89546200	89582999	310.17
chr1	89586000	89589199	11.95
chr1	89592800	89627799	49.29
chr1	89632400	89647399	18.83
chr1	89651200	89657199	17.5
chr1	89658400	89693799	34.45
chr1	89695400	89715799	39.91
chr1	89718000	89736399	34.32
chr1	89761800	89773999	13.81
chr1	89810200	89851599	23.07
chr1	89854800	89900599	97.19
chr1	89921400	89933999	310.17
chr1	89935400	89937599	17.72
chr1	89940000	89942399	84.23
chr1	89959600	89963199	12.7
chr1	89967800	89969999	162.63
chr1	89991800	89993199	12.89
chr1	90047000	90058799	58.31
chr1	90061400	90070599	23.63
chr1	90084600	90089999	10.88
chr1	90109200	90112799	13.41
chr1	90145800	90170799	116.27
chr1	90182200	90191799	17.63
chr1	90200200	90260199	152.95
chr1	90266800	90274599	14.95
chr1	90275800	90283999	10.1
chr1	90285200	90293799	67.09
chr1	90308400	90312999	10.98
chr1	90331600	90339999	16.13
chr1	90358600	90392399	11.16
chr1	90394800	90436399	35.08
chr1	90438800	90445399	26.27
chr1	90448600	90460199	22.57
chr1	90461600	90484399	22.83
chr1	90501000	90511999	8.87
chr1	90513600	90524999	48.9
chr1	90526600	90528999	11.34
chr1	90543000	90561999	37.81
chr1	90582000	90588799	17.14
chr1	90601600	90604399	310.17
chr1	90642000	90663599	192.96
chr1	90733200	90754799	82.72
chr1	90769200	90776399	45.29
chr1	90785000	90792599	16.03
chr1	90831600	90852399	42.33
chr1	90875400	90877999	12.14
chr1	90882200	90886399	60
chr1	90893200	90910999	35.67
chr1	90913200	90918399	21.75
chr1	90927200	90929199	25.52
chr1	90931000	90933599	11.59
chr1	90935000	90946199	10.47
chr1	90947400	90977199	50.98
chr1	90996000	91004599	310.17
chr1	91006800	91017999	53.99
chr1	91049200	91116199	310.17
chr1	91178000	91180599	57.16
chr1	91192000	91206599	21.36
chr1	91207800	91217399	29.97
chr1	91221400	91230999	13.04
chr1	91248000	91252399	310.17
chr1	91297800	91304199	209.76
chr1	91308200	91311199	10.84
chr1	91312400	91347199	208.43
chr1	91350200	91363599	24.59
chr1	91363600	91378599	113.86
chr1	91397400	91399999	310.17
chr1	91410200	91438199	310.17
chr1	91439200	91460999	236.44
chr1	91463200	91466399	11.98
chr1	91493000	91497999	190.57
chr1	91499600	91501799	11.42
chr1	91512800	91518399	10.68
chr1	91523000	91538399	45.65
chr1	91539600	91542399	257.57
chr1	91567000	91591999	35.76
chr1	91593200	91603799	179.87
chr1	91605000	91621399	66.68
chr1	91629800	91635199	21.49
chr1	91649800	91659999	18.74
chr1	91663800	91665199	13.31
chr1	91667400	91671999	21.31
chr1	91683600	91687399	23.06
chr1	91728200	91735799	25.96
chr1	91750200	91763999	129.38
chr1	91765600	91782399	33.36
chr1	91784200	91790599	10.73
chr1	91792800	91803399	310.17
chr1	91813200	91852799	280.47
chr1	91856000	91866199	12.91
chr1	91867800	91875799	99.75
chr1	91877200	91883399	19.52
chr1	91895800	91931599	164.7
chr1	91933000	91996999	94.99
chr1	92011200	92018199	17.05
chr1	92047600	92057599	15.89
chr1	92058800	92066799	10.22
chr1	92073200	92091999	23.56
chr1	92098200	92117399	22.1
chr1	92127200	92132599	21.32
chr1	92139400	92146199	33.13
chr1	92157400	92181999	310.17
chr1	92210800	92217599	44.14
chr1	92223000	92233599	10.94
chr1	92249200	92253599	13.24
chr1	92258400	92265799	22.94
chr1	92280600	92287999	7.36
chr1	92309600	92318199	25.92
chr1	92321800	92326599	15.79
chr1	92329600	92339199	16.33
chr1	92339800	92348999	29.21
chr1	92369000	92385199	40.97
chr1	92390400	92407799	65.82
chr1	92423200	92428999	27.3
chr1	92430200	92445199	45.53
chr1	92472800	92474599	310.17
chr1	92633800	92661599	201.82
chr1	92680000	92683599	11.47
chr1	92696200	92704399	57.18
chr1	92707800	92722399	78.14
chr1	92729000	92742799	21.6
chr1	92747600	92758199	33.82
chr1	92763800	92795599	310.17
chr1	92796600	92804999	16.48
chr1	92813000	92816399	28.49
chr1	92824800	92863599	310.17
chr1	92864800	92886799	30.85
chr1	92905400	92908399	310.17
chr1	92910000	92920999	310.17
chr1	92933000	92947799	309.97
chr1	92949000	92951999	11.8
chr1	92970800	92984799	27.75
chr1	93004800	93029599	102.52
chr1	93031000	93086999	117.15
chr1	93098600	93102999	126.2
chr1	93115000	93115799	37.28
chr1	93127800	93142599	88
chr1	93143800	93147199	11.66
chr1	93151000	93186599	310.17
chr1	93187600	93195999	83.41
chr1	93197200	93239199	310.17
chr1	93244800	93247999	21.9
chr1	93255200	93262999	46.41
chr1	93279200	93287999	36.99
chr1	93304600	93306399	167.3
chr1	93336200	93344599	310.17
chr1	93369200	93377799	25.84
chr1	93384400	93415199	71.71
chr1	93442200	93447199	310.17
chr1	93475800	93480599	310.17
chr1	93510400	93513999	310.17
chr1	93617200	93629199	35.61
chr1	93631400	93637999	310.17
chr1	93664200	93670199	116.29
chr1	93684800	93705199	310.17
chr1	93709800	93735199	7.11
chr1	93748600	93755799	310.17
chr1	93783800	93789999	10.84
chr1	93797800	93808199	310.17
chr1	93821000	93827199	310.17
chr1	93834600	93838199	12.6
chr1	94020400	94026999	11.15
chr1	94033600	94036199	88.25
chr1	94051000	94053999	20.82
chr1	95313200	95314599	310.17
chr1	95664600	95668599	104.24
chr1	96871600	96872599	55.88
chr1	97660400	97662399	310.17
chr1	97767800	97771199	310.17
chr1	97976400	97977599	286.03
chr1	98094400	98096399	310.17
chr1	104768200	104770399	68.85
chr1	104993800	104994599	121.67
chr1	105175000	105180199	16.86
chr1	105283800	105284999	11.22
chr1	105355000	105357999	310.17
chr1	105662800	105664999	310.17
chr1	105780200	105781999	46.12
chr1	105826600	105829199	11.49
chr1	105879600	105881599	31.11
chr1	105886400	105887599	16.07
chr1	105946200	105949199	15.17
chr1	105989600	105994399	310.17
chr1	106029000	106030799	10.12
chr1	106034200	106039599	16.36
chr1	106131400	106132399	10.02
chr1	106170800	106173799	310.17
chr1	106197600	106202599	15.28
chr1	106538600	106544199	13
chr1	106602600	106603999	10.57
chr1	106627000	106631399	24.56
chr1	106636400	106638199	14.72
chr1	106712000	106718399	310.17
chr1	106754800	106760599	310.17
chr1	106795600	106797199	310.17
chr1	109982000	109983599	42.18
chr1	111754000	111754999	56.73
chr1	111864000	111865599	310.17
chr1	118310400	118312399	310.17
chr1	118321200	118323399	159.16
chr1	118388000	118390799	310.17
chr1	118456400	118462599	173.38
chr1	118492600	118495799	21.56
chr1	118627600	118628599	28.17
chr1	118740600	118741799	13.56
chr1	118764600	118781999	16.19
chr1	118785800	118796399	16.97
chr1	118824000	118829199	15.26
chr1	118829800	118855799	37.08
chr1	118857000	118868599	33.63
chr1	118870600	118962799	215.03
chr1	118964200	119002399	274.57
chr1	119004000	119060199	310.17
chr1	119082000	119087199	23.22
chr1	119093000	119101199	30.6
chr1	119102400	119116399	13.77
chr1	119140800	119147799	12.9
chr1	119189400	119190999	11.3
chr1	119193800	119197799	11.2
chr1	119288800	119290799	11.59
chr1	119304000	119306799	14.86
chr1	119328800	119329999	12.57
chr1	119345400	119349799	11.4
chr1	119413000	119428399	125.34
chr1	119456000	119462799	10.74
chr1	119464600	119478199	19.29
chr1	119485800	119500199	15.09
chr1	119501400	119515999	222.33
chr1	119518000	119527199	310.17
chr1	119541000	119547199	11.52
chr1	119648000	119651199	310.17
chr1	119835600	119838399	310.17
chr1	119867000	119869799	10.59
chr1	119897800	119905999	54.78
chr1	119912800	119915199	42.76
chr1	119963800	119967599	13.05
chr1	119996600	119998399	41.21
chr1	120005400	120008199	45.84
chr1	120019600	120028799	18.04
chr1	120052400	120080599	111.56
chr1	120081800	120094799	19.85
chr1	120114800	120132199	310.17
chr1	120155200	120161399	17.2
chr1	120239800	120272199	123.4
chr1	120339000	120343599	58.34
chr1	120456400	120458999	10.03
chr1	120461800	120470999	31.64
chr1	120596200	120598399	12.2
chr1	120601600	120607999	252.94
chr1	120613400	120615999	13.35
chr1	120642400	120644999	14.11
chr1	120697600	120699399	11.16
chr1	120732600	120744799	37.48
chr1	120854600	120860999	10.82
chr1	121095800	121098399	20.93
chr1	121176400	121179199	97.16
chr1	121327000	121329799	310.17
chr1	121357400	121359999	27.67
chr1	121430000	121435999	310.17
chr1	121437200	121457199	44.82
chr1	121458800	121481399	19.32
chr1	121527400	121528999	17.91
chr1	121567000	121568399	280.47
chr1	121770600	121772799	33.33
chr1	124045000	124046399	54.11
chr1	125434000	125436599	310.17
chr1	125507600	125509599	18.88
chr1	125559200	125562399	310.17
chr1	125675200	125679199	30.68
chr1	125728400	125730999	17.12
chr1	125872400	125873599	13.01
chr1	125910600	125913399	54.73
chr1	126489200	126493599	203.13
chr1	126508200	126513799	10.18
chr1	126736000	126738599	12.96
chr1	126743600	126752999	13.94
chr1	126824000	126826199	16.91
chr1	126829800	126830999	29.48
chr1	126930600	126933999	10.77
chr1	127203800	127214999	310.17
chr1	127216200	127220799	12.72
chr1	127227000	127233999	10.29
chr1	127238800	127245399	15.65
chr1	127253400	127263999	13.91
chr1	127302200	127323999	31.32
chr1	127325400	127333199	17.91
chr1	127343000	127349399	9.8
chr1	127360200	127368999	25.51
chr1	127407200	127421599	19.8
chr1	127422800	127427399	15.31
chr1	127432000	127447599	82.98
chr1	127456800	127485999	36.87
chr1	127575600	127577399	12.78
chr1	127656800	127663999	28.22
chr1	127676800	127678399	44.62
chr1	127773000	127776799	310.17
chr1	127868400	127869599	144.22
chr1	127976200	127992999	17.38
chr1	128082800	128083599	11.02
chr1	128098600	128104599	310.17
chr1	128242600	128245599	310.17
chr1	128283400	128301399	20.27
chr1	128312800	128315199	12.6
chr1	128357200	128360399	310.17
chr1	128416400	128417999	310.17
chr1	128471400	128474599	13.6
chr1	128589000	128595999	211.17
chr1	128599400	128603399	12.34
chr1	128634600	128644599	23.7
chr1	128684600	128690399	26.85
chr1	128711200	128713199	10.78
chr1	128802200	128804399	45.13
chr1	128805600	128808999	14.12
chr1	129272400	129274199	63.83
chr1	130299200	130301999	58.38
chr1	130462200	130463399	139.23
chr1	130511400	130517799	27.58
chr1	130549800	130552199	10.79
chr1	130713800	130718199	310.17
chr1	130739400	130744999	77.22
chr1	130800600	130805599	13.11
chr1	130877800	130879399	34.76
chr1	130933600	130948199	40.82
chr1	130995400	131012599	21.13
chr1	131045800	131065199	142.96
chr1	131071000	131099999	310.17
chr1	131107000	131111399	33.63
chr1	131114200	131121199	19.69
chr1	131134000	131142199	310.17
chr1	131152800	131154399	184.39
chr1	131195800	131221999	51.05
chr1	131232800	131234599	11.16
chr1	131243400	131260999	96.57
chr1	131268200	131289799	98.45
chr1	131291400	131301399	11.3
chr1	131377800	131380199	14.31
chr1	131523600	131529199	310.17
chr1	131687000	131691199	17.62
chr1	131709000	131717599	11.31
chr1	131743400	131766399	36.08
chr1	131795600	131798199	47.84
chr1	131827000	131848799	310.17
chr1	131867200	131868199	76.57
chr1	131909600	131912199	310.17
chr1	131945600	131948599	17.12
chr1	131951600	131958199	16.15
chr1	131961400	131984199	310.17
chr1	132003000	132014199	310.17
chr1	132037200	132048199	20.79
chr1	132051200	132063799	15.37
chr1	132067200	132068399	104.92
chr1	132109800	132159999	310.17
chr1	132161200	132161999	11.24
chr1	132163400	132165599	20.68
chr1	132167800	132172199	14.71
chr1	132187400	132214199	310.17
chr1	132263800	132269599	12.75
chr1	132285800	132296399	36.97
chr1	132298200	132300599	256.12
chr1	132301400	132348999	310.17
chr1	132350200	132393399	310.17
chr1	132417000	132419799	310.17
chr1	132476200	132478599	310.17
chr1	132510600	132523799	38.54
chr1	132525200	132544199	94.66
chr1	132554400	132562799	21.27
chr1	132564000	132611599	72.32
chr1	132617800	132635199	18.09
chr1	132659400	132661799	19.15
chr1	132664200	132668999	10.96
chr1	132738200	132742799	32.66
chr1	132763800	132767599	23.91
chr1	132812800	132815399	12.6
chr1	132879600	132882599	246.71
chr1	132883800	132895199	18.99
chr1	132907800	132919399	14.7
chr1	132920600	132923599	21.12
chr1	132927600	132941199	66.43
chr1	133024000	133025999	310.17
chr1	133032800	133034199	41.41
chr1	133044800	133061199	310.17
chr1	133064600	133107799	310.17
chr1	133126400	133136199	310.17
chr1	133163600	133164999	236.96
chr1	133167000	133183799	102.51
chr1	133187200	133196599	17.38
chr1	133198600	133201999	10.31
chr1	133208200	133223999	100.94
chr1	133225200	133242399	144.01
chr1	133243600	133248199	35.76
chr1	133250400	133290399	257
chr1	133291800	133296799	22.62
chr1	133298000	133303399	32.08
chr1	133308800	133314599	21.18
chr1	133319000	133327399	21.07
chr1	133329000	133330799	42.43
chr1	133343800	133360399	23.17
chr1	133361600	133427199	310.17
chr1	133432400	133440399	39.74
chr1	133446400	133453999	58.77
chr1	133462200	133472199	64.82
chr1	133475800	133494599	310.17
chr1	133515600	133521799	20.91
chr1	133524000	133530999	19.03
chr1	133586400	133587399	12.59
chr1	133607400	133611199	310.17
chr1	133660000	133662199	310.17
chr1	133669800	133670999	15.14
chr1	133688600	133698599	64.04
chr1	133702200	133721199	27.59
chr1	133725600	133749799	74.45
chr1	133756200	133774199	141.66
chr1	133775600	133778399	26.19
chr1	133796000	133801799	50.05
chr1	133815800	133835399	39.33
chr1	133839000	133846999	10.95
chr1	133854600	133864199	24.38
chr1	133877000	133918799	180.15
chr1	133919800	133925199	33.19
chr1	133928400	133942799	65.08
chr1	133958400	133962399	12.28
chr1	133964400	133976199	58.61
chr1	133977400	133980799	27.32
chr1	134032400	134051399	47.56
chr1	134052800	134087599	310.17
chr1	134090400	134101999	289.55
chr1	134112600	134117399	11.48
chr1	134138200	134156999	20.23
chr1	134178600	134187399	21.49
chr1	134188400	134220799	224.11
chr1	134229600	134246999	90.23
chr1	134272200	134278599	19.55
chr1	134281800	134293599	68.02
chr1	134296800	134300599	170.76
chr1	134302200	134338599	217.9
chr1	134341800	134346399	115.48
chr1	134360800	134362799	310.17
chr1	134405600	134428399	310.17
chr1	134454800	134457799	310.17
chr1	134493800	134496399	310.17
chr1	134513000	134519199	138.41
chr1	134555000	134557399	310.17
chr1	134559600	134563999	310.17
chr1	134646200	134649399	105.21
chr1	134670200	134678199	11.16
chr1	134695600	134715599	173.38
chr1	134718200	134731999	46.74
chr1	134739800	134778599	113.59
chr1	134781800	134789599	12.47
chr1	134798400	134808399	19.36
chr1	134851000	134853799	15.58
chr1	134874400	134876399	15
chr1	134955000	134956399	310.17
chr1	134961400	134963999	152.08
chr1	134986800	134988399	109.36
chr1	134990400	135004399	21.35
chr1	135012800	135023199	29.78
chr1	135049000	135064399	73.37
chr1	135065600	135079599	37.18
chr1	135089000	135101199	30.6
chr1	135103800	135105599	32.39
chr1	135107600	135137799	310.17
chr1	135146000	135163399	310.17
chr1	135175600	135184399	35.27
chr1	135191000	135209199	80.6
chr1	135223000	135228599	12.46
chr1	135237000	135239799	16.67
chr1	135250200	135268399	271.52
chr1	135282200	135284599	310.17
chr1	135311400	135314399	310.17
chr1	135322400	135332399	52.9
chr1	135346800	135352799	21.36
chr1	135354400	135361199	20.06
chr1	135363400	135380999	310.17
chr1	135425200	135435999	310.17
chr1	135449000	135455599	11.15
chr1	135458000	135468199	73.26
chr1	135469600	135473599	23.93
chr1	135474800	135482199	24.86
chr1	135484000	135503199	41.55
chr1	135505600	135521799	183.65
chr1	135523200	135524799	25.66
chr1	135528600	135558399	185.66
chr1	135560600	135589399	310.17
chr1	135590600	135605199	47.66
chr1	135607000	135607999	29.35
chr1	135619000	135621999	11.3
chr1	135629600	135638599	10.65
chr1	135644000	135647999	11.95
chr1	135654600	135673999	267.32
chr1	135675200	135679199	11.1
chr1	135685000	135692199	310.17
chr1	135697600	135699799	18
chr1	135726000	135753199	310.17
chr1	135762400	135785599	310.17
chr1	135787200	135805599	144.09
chr1	135807400	135814799	19.41
chr1	135817800	135857799	310.17
chr1	135915400	135919599	21.54
chr1	135941200	135945199	19.55
chr1	135961600	135978399	37.65
chr1	135979600	135984999	10.08
chr1	136007200	136008399	17.69
chr1	136017200	136022399	310.17
chr1	136023600	136043399	103.45
chr1	136050400	136065999	35.81
chr1	136084000	136092599	14.89
chr1	136094200	136098199	13.08
chr1	136100600	136108999	71.14
chr1	136115000	136194999	310.17
chr1	136210600	136235599	310.17
chr1	136253600	136255999	10.3
chr1	136259400	136266999	128.55
chr1	136341400	136346999	310.17
chr1	136414800	136418799	310.17
chr1	136426600	136430799	13.9
chr1	136466000	136471199	310.17
chr1	136487400	136492799	22.89
chr1	136507800	136514799	8.33
chr1	136537400	136542199	25.77
chr1	136569000	136571399	18.97
chr1	136587200	136589599	26.5
chr1	136624200	136626399	310.17
chr1	136669800	136672799	12.36
chr1	136698400	136700599	9.87
chr1	136764000	136771199	18.35
chr1	136781200	136782999	12.44
chr1	136838800	136840199	12.08
chr1	136946000	136949799	73.13
chr1	136952000	136953599	31.12
chr1	136957000	136959999	21.46
chr1	137322200	137325799	84.97
chr1	137370800	137376599	20.76
chr1	137635200	137639599	28.76
chr1	137897000	137901399	301.54
chr1	137925800	137932399	19.28
chr1	137972400	137975599	24.28
chr1	138019800	138024199	18.64
chr1	138037400	138041799	15.62
chr1	138191000	138192399	15.59
chr1	138342200	138346599	10.85
chr1	138614400	138620599	310.17
chr1	138783400	138788399	28.12
chr1	138836200	138849399	310.17
chr1	138856600	138857199	215.67
chr1	138962800	138964599	310.17
chr1	139015800	139019599	12.84
chr1	139091800	139093599	28.91
chr1	139168600	139170399	17.55
chr1	139192600	139198999	20.49
chr1	139379200	139379999	16.71
chr1	139421400	139425599	310.17
chr1	139453800	139456199	310.17
chr1	140245000	140246599	129.09
chr1	141474600	141475799	16.8
chr1	143262400	143263999	30.34
chr1	143701600	143703799	310.17
chr1	143739000	143740599	310.17
chr1	143776200	143778399	310.17
chr1	144002800	144005199	214.46
chr1	146497400	146498799	20.25
chr1	149960600	149961399	27.6
chr1	150099200	150100599	67.68
chr1	150391800	150394399	310.17
chr1	150476200	150477199	21.74
chr1	150478400	150481399	10.59
chr1	150534200	150538799	83.67
chr1	150592800	150596399	15.86
chr1	150678800	150684599	28.4
chr1	150737600	150743799	10.59
chr1	150768600	150771599	28.88
chr1	150990200	150994799	310.17
chr1	151040600	151051399	10.75
chr1	151058000	151066799	17.84
chr1	151083800	151085199	19.8
chr1	151086400	151087999	18.2
chr1	151094200	151098799	25.19
chr1	151100800	151107799	10.59
chr1	151116800	151119799	10.72
chr1	151176600	151178799	14.28
chr1	151250600	151252799	10.68
chr1	151343200	151347199	310.17
chr1	151427600	151430399	310.17
chr1	151498400	151501799	310.17
chr1	151569000	151573399	55.06
chr1	151629200	151633799	11.08
chr1	151722400	151723799	11.24
chr1	151754400	151757599	310.17
chr1	151878200	151888599	9.11
chr1	151941600	151954599	15.41
chr1	151960600	151965399	26.96
chr1	151977600	151990999	17.48
chr1	152019200	152026599	7.27
chr1	152034600	152039999	14.66
chr1	152081400	152085799	13.85
chr1	152088400	152091599	310.17
chr1	152283000	152293999	26
chr1	152386000	152386999	196.16
chr1	152399600	152401599	285.07
chr1	152461000	152462799	11.68
chr1	152496400	152499999	20.87
chr1	152510800	152519399	10.81
chr1	152521200	152534399	13.99
chr1	152545200	152596999	133.87
chr1	152598600	152629199	310.17
chr1	152635600	152642799	10.73
chr1	152648200	152651999	33.02
chr1	152677000	152696599	110.39
chr1	152701600	152721599	27.66
chr1	152730600	152735599	10.76
chr1	152765800	152767599	310.17
chr1	152781800	152802399	73.87
chr1	152807400	152813399	27.51
chr1	152813800	152828799	26.82
chr1	152900400	152904799	310.17
chr1	152954800	152956599	10.76
chr1	153005400	153017199	15.45
chr1	153031000	153065999	121.52
chr1	153083400	153102599	59.23
chr1	153128800	153141999	50.73
chr1	153165800	153175999	13.05
chr1	153185600	153186599	62.33
chr1	153195600	153203199	18.76
chr1	153241400	153247599	43.84
chr1	153255800	153274999	19.55
chr1	153307400	153309799	26.31
chr1	153314200	153324599	12.46
chr1	153329400	153334199	310.17
chr1	153424600	153425799	82.04
chr1	153485600	153490199	310.17
chr1	153531000	153532999	158.73
chr1	153549400	153549999	49.25
chr1	153641000	153642999	96.65
chr1	153652200	153653799	61.41
chr1	153679200	153682399	11.13
chr1	153690800	153705599	77.51
chr1	153725000	153738399	23.38
chr1	153739800	153746799	18.84
chr1	153748200	153750599	41.69
chr1	153768200	153769799	12.02
chr1	153895600	153901999	310.17
chr1	153918600	153921199	15.33
chr1	153994600	154000199	24.7
chr1	154187400	154193999	26.14
chr1	154200800	154205599	20.51
chr1	154396200	154398999	10.31
chr1	154413600	154418599	19.34
chr1	154471200	154474199	15.31
chr1	154702600	154707999	11.28
chr1	154723400	154727199	15.92
chr1	154779800	154793199	13.58
chr1	154798400	154799799	33.53
chr1	154883400	154884999	62.79
chr1	154992800	154998199	13.83
chr1	155026000	155033399	62.2
chr1	155038800	155042799	20.1
chr1	155049200	155094399	310.17
chr1	155097400	155100199	310.17
chr1	155108200	155115799	8.69
chr1	155155800	155159999	310.17
chr1	155198200	155251199	310.17
chr1	155415200	155418799	310.17
chr1	155489200	155494199	10.14
chr1	155521200	155533999	33.39
chr1	155557400	155560199	310.17
chr1	155704200	155705999	29.16
chr1	155707400	155724999	19.72
chr1	155740600	155743399	111
chr1	155750800	155754599	17.65
chr1	155775400	155802199	68.92
chr1	155811800	155813799	310.17
chr1	155827000	155829199	10.63
chr1	155972200	155974399	310.17
chr1	156034000	156038599	310.17
chr1	156040200	156044199	47.88
chr1	156069000	156083999	42.77
chr1	156086600	156091999	11.54
chr1	156202800	156205999	97.78
chr1	156216000	156223799	19.17
chr1	156302800	156304199	107.63
chr1	156310400	156311199	27.33
chr1	156420400	156421799	139.04
chr1	156472200	156476399	310.17
chr1	156557200	156560199	310.17
chr1	156604800	156606599	42.7
chr1	156611600	156622599	47.22
chr1	156639800	156650999	30.78
chr1	156654000	156661399	13.81
chr1	156666200	156669799	43.12
chr1	156671800	156674999	138.57
chr1	156684200	156691799	12.54
chr1	156718000	156721999	310.17
chr1	156736800	156739999	11.75
chr1	156740400	156765599	156.69
chr1	156767400	156790999	167.47
chr1	156800600	156818199	13.03
chr1	156824800	156830599	17.34
chr1	156835600	156843599	36.13
chr1	156852200	156853999	16.49
chr1	156919600	156923999	19.95
chr1	156929000	156933999	13.4
chr1	156936800	156940399	310.17
chr1	156982000	157000799	22.5
chr1	157035000	157042199	40.6
chr1	157043600	157049799	34.83
chr1	157051000	157052599	10.59
chr1	157059800	157087799	95.71
chr1	157097600	157101999	14
chr1	157411200	157414199	310.17
chr1	157443200	157445199	25.26
chr1	157458200	157459799	183.07
chr1	157532000	157535999	18.9
chr1	157554200	157556599	13.18
chr1	158362000	158363199	245.05
chr1	158958800	158963199	23.42
chr1	159231600	159234999	310.17
chr1	159388600	159397599	21.61
chr1	159654400	159659199	20.35
chr1	159809200	159817399	21.2
chr1	159851800	159852599	12.68
chr1	160043000	160045199	118.15
chr1	160144800	160149199	11.1
chr1	160194400	160195999	248.16
chr1	160211200	160214599	310.17
chr1	160351000	160352399	38.96
chr1	160648600	160650799	33.96
chr1	160791800	160793599	310.17
chr1	160904800	160907799	310.17
chr1	160987000	160989999	12.8
chr1	161032000	161040799	310.17
chr1	161069600	161074199	310.17
chr1	161130600	161131999	288.59
chr1	161142200	161144599	53.04
chr1	161246000	161252199	310.17
chr1	161419800	161421199	12.72
chr1	161442800	161445199	23.65
chr1	161875000	161878599	310.17
chr1	161918000	161920399	9.35
chr1	161962200	161966599	14.05
chr1	161968000	161971399	248.19
chr1	161973600	161978799	75.11
chr1	161980600	161992799	86.42
chr1	161994600	162028199	310.17
chr1	162035600	162046399	129.29
chr1	162051600	162056999	24.36
chr1	162059400	162063799	11.47
chr1	162072600	162086399	198.1
chr1	162088600	162095799	14.68
chr1	162120400	162124999	28.86
chr1	162132600	162138199	12.54
chr1	162154800	162165399	23.77
chr1	162171000	162172199	16.13
chr1	162179200	162189599	151.81
chr1	162200200	162227599	310.17
chr1	162234800	162244799	33.97
chr1	162246200	162263799	50.03
chr1	162275000	162284199	50.92
chr1	162300000	162314999	71.97
chr1	162318800	162330199	12.88
chr1	162333000	162338599	23.43
chr1	162476800	162478199	63.4
chr1	162544000	162549199	280.86
chr1	162569400	162571799	310.17
chr1	162588200	162589999	21.08
chr1	162635200	162645199	17.48
chr1	162664000	162666599	57.8
chr1	162738000	162741399	310.17
chr1	162831200	162833799	19.41
chr1	162857000	162862599	32.4
chr1	162868800	162872999	56.45
chr1	163182200	163186799	11.63
chr1	163280200	163285599	10.02
chr1	163303200	163317599	310.17
chr1	163354200	163362399	45.67
chr1	163373800	163375799	20.65
chr1	163402000	163404399	310.17
chr1	163423400	163424999	19.39
chr1	163443000	163445799	10.46
chr1	163494800	163495599	10.61
chr1	163570800	163578199	23.05
chr1	163670000	163671999	20.35
chr1	163779200	163780399	214.24
chr1	163839800	163841799	15.66
chr1	163843000	163847599	28.21
chr1	163850800	163853799	26.72
chr1	163895600	163898399	16.33
chr1	163929000	163932399	310.17
chr1	163992400	163996799	310.17
chr1	164149200	164152199	15.38
chr1	164247600	164250999	310.17
chr1	164272400	164276199	68.81
chr1	164305200	164309599	101.89
chr1	164326800	164329599	23.83
chr1	164457400	164459199	310.17
chr1	164795800	164799799	16.1
chr1	164896000	164900999	45.91
chr1	165042000	165047799	56.74
chr1	165113800	165116199	14.53
chr1	165149200	165155399	14.82
chr1	165186400	165189599	17.74
chr1	165193400	165195199	229.02
chr1	165235800	165237999	310.17
chr1	165280600	165285599	310.17
chr1	165310200	165314799	16.97
chr1	165315800	165318999	21.36
chr1	165320200	165324199	15.99
chr1	165440600	165442199	22.99
chr1	165459200	165462199	310.17
chr1	165580200	165582199	20.06
chr1	165583800	165599599	55.45
chr1	165602000	165614399	12.6
chr1	165615800	165620999	46.34
chr1	165626000	165636599	310.17
chr1	165641600	165643399	310.17
chr1	165647200	165703399	101.12
chr1	165704800	165710199	161.4
chr1	165713400	165720999	29.14
chr1	165722000	165732599	32.42
chr1	165761400	165774599	127.92
chr1	165780200	165783799	16.57
chr1	165788600	165791799	50.27
chr1	165797000	165826199	148.02
chr1	165831800	165845999	205.97
chr1	165847200	165868799	71.14
chr1	166000000	166004199	310.17
chr1	166041200	166049999	145.2
chr1	166051000	166061399	17.69
chr1	166098400	166119199	35.44
chr1	166124800	166141399	158.96
chr1	166162800	166167799	16.42
chr1	166182600	166185799	15.07
chr1	166238000	166238999	13.46
chr1	166252600	166257799	81.04
chr1	166277400	166287599	187.85
chr1	166308400	166309799	269.57
chr1	166345000	166351399	11.69
chr1	166376400	166385999	310.17
chr1	166401800	166410399	310.17
chr1	166999200	167002799	310.17
chr1	167006400	167014599	13.43
chr1	167221000	167252799	173.39
chr1	167254000	167265599	13.88
chr1	167267000	167275199	104.03
chr1	167278600	167285799	310.17
chr1	167292200	167293199	23.92
chr1	167305800	167309799	310.17
chr1	167349600	167360999	310.17
chr1	167392600	167395399	299.7
chr1	167597400	167600199	9.66
chr1	167660400	167661599	17.82
chr1	167688000	167690599	153.2
chr1	167785600	167790199	17.47
chr1	167802000	167807599	157.73
chr1	167872000	167872999	17.4
chr1	167926000	167931599	12.75
chr1	168056400	168056999	23.35
chr1	168161800	168165999	14.17
chr1	168212400	168222999	21.66
chr1	168224200	168236199	20.4
chr1	168245600	168248399	15.7
chr1	168283200	168292999	40.83
chr1	168299400	168303199	13.91
chr1	168318800	168336399	39.88
chr1	168341200	168359799	61.81
chr1	168373800	168398399	266.73
chr1	168399800	168419999	196.09
chr1	168422200	168433199	310.17
chr1	168707400	168710199	92.1
chr1	168770200	168773399	8.86
chr1	168785400	168787999	13.49
chr1	168963000	168966799	30.19
chr1	169050600	169052399	12.44
chr1	169154600	169168199	46.24
chr1	169233200	169242799	83.87
chr1	169251600	169256999	30.59
chr1	169356400	169358999	7.97
chr1	169365400	169370399	33.4
chr1	169458400	169463199	33.31
chr1	169530200	169532199	168.34
chr1	169653200	169656199	11.58
chr1	169658800	169659999	13
chr1	169910600	169920799	10.84
chr1	169927400	169930799	13.4
chr1	169965200	169970999	310.17
chr1	170063600	170066199	14.2
chr1	170106800	170113799	281.55
chr1	170172800	170176199	310.17
chr1	170214400	170215799	310.17
chr1	170255000	170255999	72.25
chr1	170298400	170306199	21.1
chr1	170455200	170461199	10.05
chr1	170475600	170486199	91.77
chr1	170493400	170504799	51.27
chr1	170520200	170524399	35.22
chr1	170588200	170593599	310.17
chr1	170643800	170649799	143.87
chr1	170651000	170662599	36.43
chr1	170664600	170672799	15.95
chr1	170690000	170695599	18.96
chr1	170845400	170848199	19.55
chr1	170867000	170868999	157.06
chr1	170883400	170885799	310.17
chr1	170907200	170908999	89.77
chr1	171032800	171034799	9.35
chr1	171044200	171045599	77.28
chr1	171101800	171103799	211.36
chr1	171110000	171112199	79.7
chr1	171113600	171114599	146.55
chr1	171149800	171151999	310.17
chr1	171159400	171160799	12.97
chr1	171185400	171190999	15.41
chr1	171195600	171196399	22.76
chr1	171216200	171226999	92.01
chr1	171228600	171235199	29.93
chr1	171245200	171253999	310.17
chr1	171255000	171263599	57.06
chr1	171269600	171291399	310.17
chr1	171293800	171295399	310.17
chr1	171327400	171334199	310.17
chr1	171340200	171346999	310.17
chr1	171356600	171362199	95.38
chr1	171365200	171380599	48.32
chr1	171382200	171391799	62.29
chr1	171410600	171424999	310.17
chr1	171434000	171444399	130.33
chr1	171477200	171479599	35.35
chr1	171499000	171507799	310.17
chr1	172000400	172028999	310.17
chr1	172045600	172050399	63.39
chr1	172051600	172054599	123.76
chr1	172056000	172076399	205.44
chr1	172081600	172086599	310.17
chr1	172126000	172130199	240.48
chr1	172145600	172152799	310.17
chr1	172190400	172198799	16.24
chr1	172200000	172207799	310.17
chr1	172209000	172224399	218.25
chr1	172273600	172276599	14.08
chr1	172278000	172287399	26.47
chr1	172288800	172329799	310.17
chr1	172340800	172344399	22.71
chr1	172345600	172360399	85.11
chr1	172375800	172378199	310.17
chr1	172405800	172407599	18.52
chr1	172480000	172508999	310.17
chr1	172510200	172515999	27.95
chr1	172519400	172535399	63.37
chr1	172539400	172564199	191.28
chr1	172575400	172580399	7.52
chr1	172584200	172590999	12.86
chr1	172610800	172618599	39.43
chr1	172627800	172635599	310.17
chr1	173332200	173338399	38.37
chr1	173348800	173350999	27.21
chr1	173365800	173368399	202.68
chr1	174500200	174503799	310.17
chr1	174608400	174609999	24.08
chr1	174836200	174837399	14.85
chr1	174921400	174921999	13.98
chr1	175028400	175033799	31.71
chr1	175491800	175492999	185.67
chr1	175624600	175626399	310.17
chr1	175691600	175693799	310.17
chr1	175712200	175713399	13.44
chr1	175880000	175882399	310.17
chr1	176274400	176275999	310.17
chr1	176811600	176815399	310.17
chr1	176835200	176835999	62.88
chr1	176873600	176874399	12.85
chr1	176975600	177001999	58.28
chr1	177003200	177023599	60.29
chr1	177256800	177259599	310.17
chr1	177321800	177323599	81.68
chr1	177337200	177340599	106.7
chr1	177440600	177449199	310.17
chr1	177458600	177463399	16.71
chr1	177484200	177486199	10.27
chr1	177487600	177489599	14.58
chr1	177508200	177515399	12.02
chr1	177516400	177521199	88.35
chr1	177555400	177556799	19.31
chr1	177604800	177610399	25.8
chr1	177619000	177628799	24.29
chr1	177635800	177646599	38.79
chr1	177689400	177696799	22.68
chr1	177699200	177706999	57.49
chr1	177794400	177797599	310.17
chr1	177982800	177983799	73.32
chr1	178186800	178188799	104.21
chr1	178275000	178278999	310.17
chr1	178316800	178321999	310.17
chr1	178333200	178339199	310.17
chr1	178363600	178369999	184.84
chr1	178405000	178407199	310.17
chr1	178512200	178515399	12.48
chr1	178526000	178533799	310.17
chr1	178539800	178556599	51.39
chr1	178558200	178593999	67.89
chr1	178597800	178602599	14.21
chr1	178608600	178622199	42.52
chr1	178632200	178635199	17.19
chr1	178637600	178655999	11.78
chr1	178658600	178665999	11.12
chr1	178675800	178679599	12.63
chr1	178683200	178688399	16.64
chr1	178731400	178734799	14.21
chr1	178740600	178741999	14.24
chr1	178744200	178753399	15.96
chr1	178767000	178771599	11.04
chr1	178795000	178807199	73.01
chr1	178817600	178821999	17.99
chr1	178855200	178862199	13.57
chr1	178867200	178884799	18.55
chr1	178886600	178890999	14.31
chr1	178905800	178925999	97.61
chr1	178927200	178943999	33.9
chr1	178950400	178955999	13.33
chr1	178957200	178965599	37.86
chr1	178967400	178982399	25.88
chr1	178988800	179001799	19.46
chr1	179007200	179017399	12.61
chr1	179037600	179048599	24.31
chr1	179052200	179066399	228.54
chr1	179067600	179076999	10.51
chr1	179080200	179083399	10.04
chr1	179085400	179101599	67.37
chr1	179102800	179109999	14.7
chr1	179111400	179126599	16.76
chr1	179128400	179154999	82.37
chr1	179180200	179185199	17.75
chr1	179191000	179222599	65.38
chr1	179227800	179233799	22.54
chr1	179255400	179263399	37.35
chr1	179305600	179312199	26.17
chr1	179443400	179450399	22.27
chr1	179451600	179462199	43.27
chr1	179471400	179480199	11.74
chr1	179516800	179519399	154.75
chr1	179545400	179549599	310.17
chr1	179585400	179586799	13.39
chr1	179602200	179604199	11.75
chr1	179606400	179620999	21.97
chr1	179664400	179669399	310.17
chr1	179694200	179699399	11.28
chr1	179704000	179709599	11
chr1	179710800	179713999	16.58
chr1	179802000	179804599	310.17
chr1	179828000	179833399	18.89
chr1	179845000	179849199	115.91
chr1	179859000	179872399	104.74
chr1	179958800	179962399	310.17
chr1	179971200	179978999	30.29
chr1	180134600	180140199	19.86
chr1	180155200	180193199	126.23
chr1	180195000	180196999	58.09
chr1	180223000	180241799	72.54
chr1	180254600	180256999	228.48
chr1	180279400	180294199	119.18
chr1	180328800	180334199	310.17
chr1	180346600	180371799	97.4
chr1	180372800	180394599	75.28
chr1	180399600	180430599	179.96
chr1	180432000	180455399	114.19
chr1	180456600	180468599	19.62
chr1	180480200	180483999	53.99
chr1	180508600	180511199	12.19
chr1	180546400	180552199	43.27
chr1	180567600	180581599	310.17
chr1	180583200	180610199	15.36
chr1	180639200	180642399	310.17
chr1	180696400	180697599	88.19
chr1	180702800	180709599	10.22
chr1	180725000	180728199	310.17
chr1	180761600	180773799	290.57
chr1	180775000	180783999	310.17
chr1	180791600	180796999	57.2
chr1	180811800	180818599	310.17
chr1	180837200	180841999	20.03
chr1	180847400	180852399	310.17
chr1	180883800	180886199	11.26
chr1	180888000	180894999	37.86
chr1	180903000	180909999	310.17
chr1	180911000	180915999	22.45
chr1	180941000	180949999	271.96
chr1	180951200	180963999	13.23
chr1	180965200	180977999	35.3
chr1	180998200	181013199	55.78
chr1	181013800	181018399	22.76
chr1	181142600	181146799	298.93
chr1	181149800	181152199	310.17
chr1	181210000	181212999	310.17
chr1	181225200	181238399	34.05
chr1	181243600	181248399	19.44
chr1	181254200	181263599	221.29
chr1	181270600	181273999	19.36
chr1	181282000	181287599	20.54
chr1	181332000	181346199	12.62
chr1	181352000	181354399	268.8
chr1	181375200	181389599	13.93
chr1	181435600	181437399	17.32
chr1	181440000	181445999	12.28
chr1	181510200	181512999	10.03
chr1	181559000	181573199	61.62
chr1	181830400	181846999	310.17
chr1	181848000	181853799	17.9
chr1	181859800	181867999	25.7
chr1	181876800	181899599	49.46
chr1	181921600	181923799	41.91
chr1	182018400	182021399	310.17
chr1	182052400	182056199	26.89
chr1	182061200	182069599	11.85
chr1	182070800	182083799	21.46
chr1	182084000	182116599	100.96
chr1	182124400	182126599	310.17
chr1	182135400	182137999	12.68
chr1	182280600	182283599	310.17
chr1	182339800	182342399	310.17
chr1	182408000	182410199	310.17
chr1	182465400	182497599	44.88
chr1	182499000	182506999	15.07
chr1	182508600	182514199	26.66
chr1	182515400	182521999	310.17
chr1	182538800	182543599	32.23
chr1	182554200	182565399	26.51
chr1	182572000	182575199	63.53
chr1	182603600	182625399	49.25
chr1	182638200	182649999	34.91
chr1	182656600	182681199	100.07
chr1	182747200	182749399	35.3
chr1	182762200	182768399	310.17
chr1	182775600	182797799	22.85
chr1	182800400	182805399	13.28
chr1	182812800	182825999	44.59
chr1	182851400	182863599	35.25
chr1	182865200	182876599	34.59
chr1	182890800	182892599	20.8
chr1	182894400	182911999	46.31
chr1	182951400	182961599	54.19
chr1	182980800	182991599	66.94
chr1	183038400	183045399	21.2
chr1	183052000	183072999	87.11
chr1	183074800	183075999	11.37
chr1	183077400	183104599	46.91
chr1	183111600	183121399	81.05
chr1	183123000	183132799	10.93
chr1	183134000	183153199	79.93
chr1	183154400	183161799	13.68
chr1	183163000	183173199	48.93
chr1	183178400	183196799	92.15
chr1	183206400	183213399	6.88
chr1	183220000	183224799	310.17
chr1	183295600	183300399	310.17
chr1	183344800	183346799	310.17
chr1	183366800	183370599	310.17
chr1	183388400	183392799	66.55
chr1	183416400	183420599	13.34
chr1	183434800	183440799	14.31
chr1	183450400	183453799	11.95
chr1	183545800	183556799	13.6
chr1	184032800	184048199	310.17
chr1	184063000	184066999	12.05
chr1	184333800	184338799	13.97
chr1	184341400	184345199	11.1
chr1	184440800	184444799	13.56
chr1	184642200	184645599	11.97
chr1	184724000	184735599	310.17
chr1	184770400	184772399	12.51
chr1	184806000	184813999	31.52
chr1	184820600	184827599	14.32
chr1	184838000	184847999	140.33
chr1	184858800	184875999	61.44
chr1	184882000	184883399	112.34
chr1	184894400	184910199	9.84
chr1	184954800	184963999	16.17
chr1	184997200	185000599	310.17
chr1	185181400	185188599	8.67
chr1	185203200	185206599	240.49
chr1	185207800	185210199	10.37
chr1	185242400	185256599	51.04
[truncated: 31,899 more rows]

## Sheet: H3K27me3
Chrom	Start	End	-log10(pvalue)
chr1	3668600	3675199	310.14
chr1	4487200	4502799	310.14
chr1	4687800	4689599	13.29
chr1	5015800	5027599	310.14
chr1	5588600	5589399	15.84
chr1	5915000	5918999	310.14
chr1	6356800	6360599	201.96
chr1	6382400	6384199	21.11
chr1	6439600	6442399	91.91
chr1	9296400	9303199	310.14
chr1	9545400	9546599	29.18
chr1	9782200	9786599	11.13
chr1	9795000	9799399	147.95
chr1	9846200	9851799	290.83
chr1	9908200	9908999	10.57
chr1	9963800	9971399	310.14
chr1	11412600	11416199	45.65
chr1	12644600	12644999	33.89
chr1	12989200	12994599	309.6
chr1	13103600	13105399	23.1
chr1	13122400	13133999	310.14
chr1	13492400	13496599	9.22
chr1	14502400	14509599	131.87
chr1	14627800	14634599	13.25
chr1	14750800	14761199	310.14
chr1	14916600	14920199	68.4
chr1	15285200	15288599	57.18
chr1	15891000	15895799	161.26
chr1	16092400	16093799	64.77
chr1	17095400	17099999	310.14
chr1	18054000	18061399	310.14
chr1	19093600	19117399	310.14
chr1	19202800	19244799	310.14
chr1	20475800	20479599	34.48
chr1	20889400	20892599	22.14
chr1	21271000	21273799	19.25
chr1	21959400	21963999	310.14
chr1	22530600	22538999	310.14
chr1	22803400	22808999	310.14
chr1	23759000	23767199	310.14
chr1	24132200	24134999	16.27
chr1	24583000	24591399	310.14
chr1	25228200	25229799	12.85
chr1	25825800	25833599	223.37
chr1	32170200	32175199	72.59
chr1	33903600	33910199	310.14
chr1	34454400	34464999	310.14
chr1	34470200	34477399	310.14
chr1	34484600	34486399	18.16
chr1	34534600	34539199	310.14
chr1	34577200	34581799	276.83
chr1	34673600	34681599	310.14
chr1	34744400	34755599	310.14
chr1	36062800	36071999	225.86
chr1	36253200	36260199	197.58
chr1	36268200	36277199	163.74
chr1	36295800	36305599	170.73
chr1	36307600	36320799	233.8
chr1	36469600	36473799	21.98
chr1	36738000	36744599	32.52
chr1	36769600	36772999	125.94
chr1	36784600	36786399	28.32
chr1	37028400	37032399	11.03
chr1	37538800	37544599	310.14
chr1	37665400	37669999	25.79
chr1	37715400	37723599	310.14
chr1	37913400	37916199	13.4
chr1	38624000	38631999	60.85
chr1	38833600	38840199	310.14
chr1	38895400	38899999	57.55
chr1	39028200	39030399	11.18
chr1	39189800	39198799	310.14
chr1	39334600	39337999	15.54
chr1	39359600	39362599	10.57
chr1	39475600	39478999	238.5
chr1	39647400	39653799	310.14
chr1	40266200	40268999	20.29
chr1	40322800	40328399	310.14
chr1	40465400	40465999	11.83
chr1	40495200	40497399	10.55
chr1	40676000	40685599	310.14
chr1	41128200	41134799	16.15
chr1	41646200	41651999	30.89
chr1	41654200	41656999	13.19
chr1	42414600	42418199	19.32
chr1	42490800	42493399	107.6
chr1	42587200	42589999	11.34
chr1	42679600	42721999	310.14
chr1	42951800	42955199	14.39
chr1	43161000	43165199	38.27
chr1	44198000	44200199	59.22
chr1	45923800	45927999	113.52
chr1	46088600	46089599	28.27
chr1	50921400	50932599	310.14
chr1	52232600	52235799	11.92
chr1	52497800	52500999	142.19
chr1	52724400	52731199	310.14
chr1	52951600	52955199	138.44
chr1	53925200	53927199	14.83
chr1	54192400	54197199	233.88
chr1	54441600	54449999	12.02
chr1	54556200	54559799	36.95
chr1	54922000	54928399	73.46
chr1	55359800	55366599	310.14
chr1	55403000	55409199	285.49
chr1	56967000	56990199	310.14
chr1	57774000	57776999	27.1
chr1	57941400	57945999	11.09
chr1	59482400	59484999	22.23
chr1	59590000	59598399	219.92
chr1	60040200	60045799	310.14
chr1	61228600	61238399	23.35
chr1	61635200	61640399	72.58
chr1	62701800	62708999	143.21
chr1	63205400	63216999	41.69
chr1	63243400	63281599	310.14
chr1	63307800	63314399	310.14
chr1	63445000	63448999	161.13
chr1	63613200	63614999	56.22
chr1	63658400	63669199	44.31
chr1	64730800	64740199	310.14
chr1	65310000	65312799	256.21
chr1	66173600	66177199	27.9
chr1	66466600	66470799	310.14
chr1	67136600	67140199	13.44
chr1	69102000	69114599	310.14
chr1	72210600	72212599	40.06
chr1	72223200	72225999	38.93
chr1	72233200	72236799	24.85
chr1	72284000	72285799	12.06
chr1	72529000	72540799	310.14
chr1	72575600	72579599	10.93
chr1	72821600	72827999	126.56
chr1	72868800	72877599	310.14
chr1	74034200	74037399	26.33
chr1	74065000	74072599	69.17
chr1	74090000	74106999	310.14
chr1	74117600	74129799	310.14
chr1	74745000	74752199	149.45
chr1	74763600	74813999	310.14
chr1	74848800	74861999	310.14
chr1	74875200	74965599	310.14
chr1	75214400	75223799	310.14
chr1	75250600	75280599	310.14
chr1	75357400	75368199	310.14
chr1	75374200	75395399	310.14
chr1	75413000	75434399	310.14
chr1	75437400	75493799	310.14
chr1	75545400	75550999	20.76
chr1	75598600	75603799	23.04
chr1	77512800	77518599	10.23
chr1	77971400	77985399	47.48
chr1	78006600	78030799	211.04
chr1	78080200	78082399	11.64
chr1	78103200	78110199	51.08
chr1	78112000	78124599	60.46
chr1	78124600	78161999	310.14
chr1	78163600	78173599	29.75
chr1	78174800	78221799	310.14
chr1	78305400	78312999	310.14
chr1	78508800	78513599	119.7
chr1	79669800	79674599	290.91
chr1	79857000	79859399	21.2
chr1	80756200	80760399	298.31
chr1	82146800	82153599	17.24
chr1	82285800	82293799	102.67
chr1	82583800	82588999	310.14
chr1	83404600	83410199	171.37
chr1	84283000	84285999	62.25
chr1	84692000	84697599	310.14
chr1	84709000	84712199	34.09
chr1	84931800	84937799	310.14
chr1	86016200	86022799	310.14
chr1	86040600	86049399	310.14
chr1	86297400	86308599	310.14
chr1	86665000	86678999	310.14
chr1	87095600	87101799	19.43
chr1	87123600	87130199	310.14
chr1	87141600	87177799	310.14
chr1	87179200	87193399	310.14
chr1	87203800	87211199	71.2
chr1	87257200	87277799	310.14
chr1	87469600	87482599	310.14
chr1	87503200	87515199	310.14
chr1	88205200	88205999	10.07
chr1	89411600	89413399	18.17
chr1	89579200	89582999	310.14
chr1	89915800	89948399	310.14
chr1	89956400	89983399	310.14
chr1	89985200	90011399	310.14
chr1	90109200	90125799	68.09
chr1	90127200	90134399	11.29
chr1	90200200	90205399	46.14
chr1	90914400	90918399	124.01
chr1	90925800	90930999	156.37
chr1	90949000	90963199	11.86
chr1	90995800	91000599	20.75
chr1	91177800	91183599	310.14
chr1	91320200	91370799	310.14
chr1	91403200	91406599	19.88
chr1	91411600	91415399	22.31
chr1	91457200	91460999	11.46
chr1	91492000	91495399	32.58
chr1	91535600	91543399	139.15
chr1	91799400	91806799	310.14
chr1	92476000	92479599	10.03
chr1	92827200	92833599	25.94
chr1	92846000	92850399	21.38
chr1	92896000	92902999	13.47
chr1	92907200	92912199	21.73
chr1	92976000	92979999	11.36
chr1	93095200	93107199	310.14
chr1	93111800	93121599	39.61
chr1	93168600	93182799	30.82
chr1	93187800	93195799	142.17
chr1	93221200	93240199	236.04
chr1	93400400	93402199	13.75
chr1	93683600	93691599	230.85
chr1	94079800	94083199	20.66
chr1	95664000	95669999	73.19
chr1	96870600	96873999	310.14
chr1	97659600	97664799	38.39
chr1	104768000	104771599	237.3
chr1	104993600	104995599	34.28
chr1	105353800	105359399	163.84
chr1	105776800	105783399	310.14
chr1	105842600	105845799	310.14
chr1	105989400	105993999	38.05
chr1	106171400	106173799	72.33
chr1	106712200	106714799	66.34
chr1	109981000	109985399	261.81
chr1	112414600	112418399	152.8
chr1	118622000	118630799	310.14
chr1	119045800	119056199	49.98
chr1	119075000	119078399	62.19
chr1	119187200	119192799	145.37
chr1	119302600	119307599	24.54
chr1	119328000	119330399	31.1
chr1	119387600	119395599	36.51
chr1	119413000	119428399	310.14
chr1	119455000	119458399	17.19
chr1	120005000	120009799	310.14
chr1	120071800	120073799	24.54
chr1	120262800	120267199	31.84
chr1	120333000	120347999	310.14
chr1	120580800	120627599	310.14
chr1	120639400	120646199	28.38
chr1	120948200	120974799	144.77
chr1	121096600	121098599	23.06
chr1	121174400	121183799	310.14
chr1	121369400	121376599	19.75
chr1	121524400	121532599	310.14
chr1	122357000	122357399	19.24
chr1	123837400	123839799	10.64
chr1	124042400	124050399	310.14
chr1	125907800	125917999	310.14
chr1	126491000	126494399	20.33
chr1	126736400	126739599	38.5
chr1	126828600	126832799	126.13
chr1	127522400	127530599	25.47
chr1	127533000	127546799	38.09
chr1	127669600	127683599	310.14
chr1	128589000	128593999	282.05
chr1	129270000	129277199	310.14
chr1	130462000	130463999	16.09
chr1	130713400	130717999	93.02
chr1	130876000	130880799	267.4
chr1	131237800	131252799	310.14
chr1	131597400	131600799	72.03
chr1	131865000	131870799	79.39
chr1	131960000	131979599	310.14
chr1	132061800	132071199	310.14
chr1	132136800	132143799	52.7
chr1	132187000	132205999	310.14
chr1	132290600	132304799	310.14
chr1	132314200	132319599	62.85
chr1	132528400	132550799	310.14
chr1	132683400	132688199	14.69
chr1	132702000	132707999	26.91
chr1	132732000	132752199	310.14
chr1	132797200	132811199	77.75
chr1	132812800	132815199	11.66
chr1	132870200	132893999	310.14
chr1	132915600	132919599	23.83
chr1	133154800	133185799	310.14
chr1	133194600	133205999	14.42
chr1	133218800	133223999	10.3
chr1	133225200	133230399	25.46
chr1	133296000	133302399	43.29
chr1	133325800	133333599	205.58
chr1	133352600	133373199	310.14
chr1	133797600	133801999	193.45
chr1	133852200	133861799	52.33
chr1	133886000	133891199	20.06
chr1	133904400	133912599	48.97
chr1	134061400	134063799	12.12
chr1	134188600	134189799	10.05
chr1	134232200	134248199	310.14
chr1	134296200	134302199	310.14
chr1	134512000	134516999	192.41
chr1	134640400	134655999	310.14
chr1	134703600	134715399	310.14
chr1	134986800	134990999	31.25
chr1	135081200	135092399	310.14
chr1	135095600	135112799	310.14
chr1	135124800	135134599	16.36
chr1	135141800	135147799	19.56
chr1	135247600	135249799	19.51
chr1	135507600	135511399	67.2
chr1	135582000	135585999	47.93
chr1	135684800	135691399	60.78
chr1	135696800	135701199	91.05
chr1	135764600	135767599	20.26
chr1	135812600	135828999	310.14
chr1	135913400	135927999	310.14
chr1	135940800	135944799	27.9
chr1	136004600	136008999	41.13
chr1	136046600	136056399	310.14
chr1	136230000	136234999	12.09
chr1	136254800	136264799	310.14
chr1	136730000	136732799	20.98
chr1	136943200	136960599	310.14
chr1	138382000	138385799	12.49
chr1	138830800	138851999	310.14
chr1	146493600	146499799	310.14
chr1	150098600	150101399	25.82
chr1	151569000	151573399	310.14
chr1	152398600	152403199	198.37
chr1	152763200	152767199	61.02
chr1	152950600	152957799	310.14
chr1	153071200	153075199	68.3
chr1	153183600	153188799	310.14
chr1	153422600	153428799	310.14
chr1	153547400	153550399	31.67
chr1	153649400	153655399	191.35
chr1	153656600	153672999	202.75
chr1	153732200	153746399	310.14
chr1	154200600	154206999	310.14
chr1	154722200	154729799	310.14
chr1	154782800	154785999	11.56
chr1	154880000	154889199	310.14
chr1	155243800	155248799	25.3
chr1	155722800	155755399	310.14
chr1	156198600	156209999	310.14
chr1	156301000	156306599	310.14
chr1	156308400	156312999	261.47
chr1	156672800	156674799	38.72
chr1	157448400	157451199	30.18
chr1	157974600	157978399	12.27
chr1	158351200	158364199	310.14
chr1	160043600	160044799	10.64
chr1	161166800	161174199	132.43
chr1	162474000	162478199	310.14
chr1	163306800	163317599	310.14
chr1	164248800	164251199	17.18
chr1	164453800	164463199	310.14
chr1	165120800	165122199	10.26
chr1	165193600	165194999	16.69
chr1	165281600	165283199	13.2
chr1	165704200	165710599	67.71
chr1	165763600	165765599	10.97
chr1	165767000	165768599	25.87
chr1	165839400	165851599	310.14
chr1	166044400	166050199	35.6
chr1	166152800	166160799	310.14
chr1	166251000	166257999	174.45
chr1	166307200	166311399	301.75
chr1	166999200	167004399	310.14
chr1	167288200	167290199	17.27
chr1	167338200	167344399	241.53
chr1	167386000	167397999	138.05
chr1	167401800	167411799	30.21
chr1	167419600	167449999	308.98
chr1	167496400	167501999	37.15
chr1	167594800	167608799	176.87
chr1	167638000	167647199	51.25
chr1	167653000	167679599	310.14
chr1	167684600	167701199	310.14
chr1	167800000	167806199	154.04
chr1	167887200	167889799	21.8
chr1	167923000	167931199	106.34
chr1	168431200	168432799	15.46
chr1	169745800	169750799	67.85
chr1	170587000	170592199	93.01
chr1	170904200	170918399	310.14
chr1	171028200	171036799	109.26
chr1	171063400	171066399	105.74
chr1	171069400	171071399	310.14
chr1	171077800	171078999	131.83
chr1	171085200	171088399	253.39
chr1	171152000	171161599	310.14
chr1	171185600	171201199	310.14
chr1	171366200	171375999	58.83
chr1	171377000	171390199	133.81
chr1	171436000	171440399	110.05
chr1	172045200	172064999	310.14
chr1	172243200	172246399	135.72
chr1	172320800	172346999	310.14
chr1	172348600	172356799	79.89
chr1	172368600	172373799	13.24
chr1	172500000	172503199	191.62
chr1	172532000	172535399	12.52
chr1	172554400	172569199	310.14
chr1	172583600	172589599	31.57
chr1	173364400	173370999	310.14
chr1	174500400	174504999	310.14
chr1	174920000	174922999	37.39
chr1	175488800	175495999	281.4
chr1	176272400	176277999	310.14
chr1	176834000	176835999	26.74
chr1	176997600	176998399	22.15
chr1	177321600	177323599	18.02
chr1	178274400	178279599	128.95
chr1	178527400	178531399	73.68
chr1	180254000	180256399	68.84
chr1	180264600	180268399	9.45
chr1	180329200	180336799	310.14
chr1	180480000	180489399	310.14
chr1	180546400	180550799	16.5
chr1	180694400	180700599	310.14
chr1	180761800	180764199	36.77
chr1	180888600	180897399	310.14
chr1	180931800	180946999	310.14
chr1	181012400	181023999	35.03
chr1	181255600	181258799	17.63
chr1	181345800	181356799	310.14
chr1	181563400	181564799	16.64
chr1	181852400	181853999	16.52
chr1	182019200	182020799	14.05
chr1	182525600	182530999	160.34
chr1	182759000	182767599	218.08
chr1	184031600	184036999	15.62
chr1	184483600	184487199	32.16
chr1	184705000	184741399	310.14
chr1	184807000	184812799	284.92
chr1	184843000	184849999	156.99
chr1	184851200	184854399	16.98
chr1	184879000	184886199	310.14
chr1	184998600	185000799	41.97
chr1	185452600	185459999	310.14
chr1	186831600	186836599	180.24
chr1	187602000	187613199	310.14
chr1	187898400	187906799	12.01
chr1	187996800	188000799	14.68
chr1	188030000	188031399	11.53
chr1	189339600	189344999	310.14
chr1	190166000	190182399	310.14
chr1	190330200	190333399	18.98
chr1	190340000	190350399	18.77
chr1	190383400	190385999	10.09
chr1	190444400	190450799	103.46
chr1	190525400	190527399	11.78
chr1	191095800	191113399	197.98
chr1	191176200	191193799	310.14
chr1	191395600	191397599	112.04
chr1	191984600	191987599	66.67
chr1	192089400	192093599	135.56
chr1	192187800	192195799	310.14
chr1	192829400	192837999	185.96
chr1	192850200	192858999	123.04
chr1	193149000	193157399	310.14
chr1	194936600	194941799	145.59
chr1	194976000	194978599	12.15
chr1	195241400	195241799	18.58
chr10	3364000	3370399	310.14
chr10	4265600	4268799	54
chr10	4708000	4716399	310.14
chr10	5547800	5553399	84.26
chr10	5918800	5923599	272.64
chr10	6787600	6789999	26.16
chr10	7388800	7395799	310.14
chr10	7402600	7404999	38.23
chr10	7491000	7493599	194.48
chr10	7589400	7594399	310.14
chr10	7866200	7870799	310.14
chr10	8216400	8219999	13.32
chr10	8221800	8228399	10.93
chr10	8516200	8519399	153.36
chr10	8548600	8549799	110.36
chr10	9671400	9678399	310.14
chr10	10298600	10300999	11.83
chr10	10688000	10691399	109.91
chr10	11077600	11084399	310.14
chr10	12938000	12944999	310.14
chr10	12960800	12965999	28.93
chr10	13058600	13066399	310.14
chr10	13086800	13092799	42.03
chr10	13469800	13476799	310.14
chr10	13961800	13969599	310.14
chr10	14542800	14547199	310.14
chr10	14758600	14762599	120.73
chr10	18317200	18320199	17.14
chr10	18548800	18550399	17.34
chr10	18590800	18592399	16.56
chr10	18741200	18746199	310.14
chr10	18842400	18848199	310.14
chr10	19337200	19341399	29.34
chr10	19348000	19368199	310.14
chr10	19589600	19593199	11.72
chr10	19710200	19714999	240.42
chr10	19844000	19857199	310.14
chr10	19930600	19938199	310.14
chr10	20145800	20152799	310.14
chr10	20272400	20274599	35.7
chr10	21054000	21057199	9.68
chr10	21098800	21104599	59.98
chr10	21156200	21164999	310.14
chr10	21881200	21884199	78.46
chr10	21991200	21994599	83.41
chr10	22140600	22146199	24.64
chr10	22148200	22166799	310.14
chr10	22169800	22174199	32.87
chr10	22273200	22275599	310.14
chr10	22281400	22288799	28.6
chr10	22343800	22353199	15.09
chr10	22808600	22827599	310.14
chr10	22835800	22846399	247.61
chr10	23344800	23351799	207.67
chr10	23796000	23798399	41.4
chr10	24219800	24226999	310.14
chr10	24261600	24264199	13.66
chr10	24710600	24713199	140.34
chr10	26075200	26079799	310.14
chr10	26695200	26697399	26.44
chr10	27206800	27207599	10.45
chr10	29143200	29149799	310.14
chr10	29533200	29537199	33.66
chr10	30841400	30846999	30.94
chr10	32887600	32891599	225.52
chr10	33622400	33625599	182.41
chr10	34127200	34129399	16.33
chr10	36504800	36510999	310.14
chr10	39317600	39318399	10.96
chr10	39367800	39370399	11.95
chr10	39924600	39928999	310.14
chr10	40020600	40025399	26.99
chr10	40139400	40143599	181.95
chr10	40151600	40156199	58.35
chr10	40646000	40648199	32.12
chr10	41068000	41078399	310.14
chr10	41683400	41685199	12.99
chr10	42015600	42018599	34.4
chr10	42273400	42278599	237.89
chr10	42560800	42602399	310.14
chr10	42605600	42640599	310.14
chr10	42678800	42681199	37.04
chr10	42859800	42870199	6.61
chr10	42937200	42942799	10.57
chr10	42948400	42950999	10.26
chr10	42953400	42958799	19.22
chr10	42991000	42995799	10.16
chr10	43013600	43025199	310.14
chr10	43168200	43180799	310.14
chr10	44000600	44009999	310.14
chr10	44147400	44149799	132.79
chr10	44455800	44460199	78.72
chr10	44525000	44530199	310.14
chr10	45285800	45291599	310.14
chr10	45332800	45337999	310.14
chr10	45485200	45489799	41.6
chr10	49782200	49784199	21.75
chr10	49786000	49791599	55.36
chr10	50888400	50913399	310.14
chr10	51589600	51591599	38.78
chr10	51675200	51681199	310.14
chr10	52018600	52033999	310.14
chr10	52690200	52693999	273.87
chr10	52703000	52705799	54.15
chr10	53748000	53756999	310.14
chr10	54073400	54077999	56.95
chr10	56741200	56742599	18.57
chr10	57630600	57633399	310.14
chr10	57741000	57742999	11.8
chr10	58223800	58226599	17.97
chr10	58672800	58676799	12.54
chr10	58808000	58820999	310.14
chr10	59614800	59617599	12.93
chr10	59941200	59943599	16.33
chr10	59949400	59951599	31.54
chr10	59955600	59959599	87.44
chr10	60086800	60088999	16.48
chr10	60102800	60121799	310.14
chr10	60185000	60187399	38.56
chr10	60190200	60194799	14.89
chr10	60214400	60221799	172.29
chr10	60473800	60479399	35
chr10	60566200	60570999	18.6
chr10	60589200	60609399	39.6
chr10	60622800	60627599	11.07
chr10	60679400	60694399	310.14
chr10	60696200	60699399	13.1
chr10	60798200	60806599	12.61
chr10	60824800	60840799	310.14
chr10	61174000	61180799	96.72
chr10	61211000	61213999	34.63
chr10	61270400	61275999	72.23
chr10	61405400	61409999	16.75
chr10	61413200	61424999	310.14
chr10	61591000	61600799	310.14
chr10	61618600	61628199	310.14
chr10	61695800	61696999	29.75
chr10	61709800	61718199	49.71
chr10	61935000	61943199	31.12
chr10	61970600	61985399	310.14
chr10	62099600	62105199	17.67
chr10	62106600	62153399	310.14
chr10	62183000	62186799	13.81
chr10	62201600	62208399	17.84
chr10	62228000	62236599	64.4
chr10	62506800	62509399	19.68
chr10	62721200	62731399	215.68
chr10	63088200	63102599	310.14
chr10	63380600	63383399	31.32
chr10	64085200	64091599	310.14
chr10	67316800	67323399	123.97
chr10	67530200	67542999	310.14
chr10	67908800	67913999	41.61
chr10	68722800	68725599	58.89
chr10	69392800	69402399	310.14
chr10	69570800	69578399	36.26
chr10	70241800	70251599	310.14
chr10	70597000	70603599	310.14
chr10	71157400	71166399	148.93
chr10	71284800	71289199	19.43
chr10	73093800	73103599	310.14
chr10	73820800	73822599	14.33
chr10	74959400	74983199	310.14
chr10	74988200	74996399	36.54
chr10	75059600	75064999	259.67
chr10	75313600	75320599	310.14
chr10	75552200	75566199	310.14
chr10	75584400	75586399	14.63
chr10	75663800	75671599	149.89
chr10	75776000	75784199	126.36
chr10	75796400	75800999	113.65
chr10	75832200	75835999	62.31
chr10	75924400	75941599	310.14
chr10	75949800	75951399	15.52
chr10	76583200	76585199	128.65
chr10	76960400	76961999	25.7
chr10	77415400	77418599	310.14
chr10	77520400	77525599	53.45
chr10	77663600	77664799	58.98
chr10	77673200	77679799	310.14
chr10	77682600	77697599	310.14
chr10	77900000	77905799	129.13
chr10	77965600	77973999	310.14
chr10	78041000	78044199	27.05
chr10	78066800	78074199	232.49
chr10	78350600	78353199	26.98
chr10	78387800	78393199	99.98
chr10	78480200	78484599	97.07
chr10	78486000	78489599	20.15
chr10	78750800	78753199	14.78
chr10	78777400	78782199	160.65
chr10	79591800	79603399	45.75
chr10	79604600	79616199	310.14
chr10	79637000	79641799	17.65
chr10	79650800	79656399	16.08
chr10	79708800	79729999	310.14
chr10	79732200	79744399	99.2
chr10	79770400	79790799	310.14
chr10	79879400	79884799	171.63
chr10	79911200	79942199	310.14
chr10	79962600	79984399	310.14
chr10	79986800	79992199	64.71
chr10	79996400	80029199	310.14
chr10	80046000	80052199	78.96
chr10	80123200	80165999	310.14
chr10	80175000	80195399	310.14
chr10	80206400	80210199	19.82
chr10	80295600	80374399	310.14
chr10	80435800	80438599	11.66
chr10	80441200	80540999	310.14
chr10	80801200	80814599	307.37
chr10	80829400	80859199	310.14
chr10	80869800	80874399	78.21
chr10	80881800	80890799	310.14
chr10	80926000	80941599	310.14
chr10	80981000	81014999	310.14
chr10	81018400	81035399	310.14
chr10	81117600	81150799	310.14
chr10	81189600	81202599	310.14
chr10	81204000	81216999	10.65
chr10	81227800	81234199	310.14
chr10	81235400	81266799	310.14
chr10	81268400	81293999	310.14
chr10	81327800	81350799	310.14
chr10	81355600	81360199	60.37
chr10	81362000	81378999	310.14
chr10	81384200	81415399	310.14
chr10	81416800	81437399	310.14
chr10	81448600	81496399	310.14
chr10	81501200	81514799	76.36
chr10	81517000	81528199	80.16
chr10	81557000	81602599	310.14
chr10	82492000	82494399	59.34
chr10	82954000	82955399	30.64
chr10	82977800	82989999	73.85
chr10	83331800	83342399	310.14
chr10	83531800	83534799	99.37
chr10	83722000	83725199	20.52
chr10	84750000	84769399	310.14
chr10	85184000	85185199	34.28
chr10	85382200	85392199	310.14
chr10	85442800	85459399	24.03
chr10	85596400	85601199	116.3
chr10	85920000	85930399	282.93
chr10	86300000	86302599	36.42
chr10	86777800	86782999	103.24
chr10	86835200	86844199	10.94
chr10	86846000	86866599	16.12
chr10	87056200	87058999	21.82
chr10	87480200	87503999	310.14
chr10	88353400	88359399	310.14
chr10	88379200	88381199	17.32
chr10	88882400	88888599	310.14
chr10	89256200	89258799	23.4
chr10	89342000	89347799	310.14
chr10	89620800	89621999	11.49
chr10	89870600	89875999	310.14
chr10	90770400	90773199	11.09
chr10	90824800	90835799	310.14
chr10	90963000	90973599	310.14
chr10	92160600	92166999	71.85
chr10	93534000	93535999	27.16
chr10	93537600	93540799	11.95
chr10	93635400	93644199	310.14
chr10	93817000	93820999	13.02
chr10	93828800	93836799	310.14
chr10	94310400	94314999	310.14
chr10	94512000	94518599	310.14
chr10	94620200	94622599	15.41
chr10	94940000	94949399	310.14
chr10	95262200	95269399	130.82
chr10	95392400	95399799	38
chr10	95410600	95421999	310.14
chr10	100014600	100018199	30.34
chr10	103025000	103038399	310.14
chr10	103366200	103369199	184.02
chr10	105572000	105573799	14.2
chr10	106467600	106473599	310.14
chr10	107267800	107274399	310.14
chr10	107485000	107489599	23.46
chr10	107493200	107494799	10.95
chr10	108328800	108334599	134.78
chr10	109007600	109013799	310.14
chr10	110451200	110459399	310.14
chr10	112263600	112274799	310.14
chr10	112820600	112824999	12.01
chr10	114798600	114805199	310.14
chr10	115467000	115469599	11.56
chr10	115583200	115590399	310.14
chr10	116017800	116019799	43.75
chr10	116299200	116304199	277.05
chr10	116472200	116475799	59.63
chr10	117018400	117026999	64.04
chr10	117148400	117150399	15.51
chr10	117416800	117420799	13.53
chr10	117429600	117434399	10.46
chr10	117567000	117574599	37.99
chr10	117578400	117581799	16.34
chr10	117626600	117632599	302.56
chr10	118128600	118130599	10.22
chr10	119452400	119455999	38.89
chr10	119690000	119694999	63.51
chr10	120197000	120203799	310.14
chr10	120895000	120901399	107.25
chr10	120977600	120982999	18.38
chr10	120994200	120997399	48.3
chr10	121023600	121024599	19.35
chr10	121031200	121036999	101.25
chr10	121266400	121268399	17.28
chr10	121304800	121317199	310.14
chr10	121347200	121353399	310.14
chr10	121639400	121645199	310.14
chr10	122445000	122454999	310.14
chr10	122673800	122681799	310.14
chr10	122802000	122803199	12.43
chr10	122962200	122964999	42.49
chr10	123260400	123268999	310.14
chr10	125387800	125389799	84.5
chr10	126678400	126680999	11.14
chr10	126925400	126930199	53.62
chr10	127039600	127067199	310.14
chr10	127075000	127099999	310.14
chr10	127161800	127185799	310.14
chr10	127234200	127240199	43.93
chr10	127257000	127266799	310.14
chr10	127320000	127334599	310.14
chr10	127336000	127342599	200.14
chr10	127506800	127521199	310.14
chr10	127522800	127542999	310.14
chr10	127617600	127622399	24.93
chr10	127642400	127644799	12.95
chr10	127656400	127669799	310.14
chr10	127719400	127728799	136.43
chr10	128193800	128197399	102.01
chr10	128213000	128216799	25.35
chr10	128515000	128531199	310.14
chr10	128581800	128591599	310.14
chr10	128642800	128646999	48.64
chr10	128737400	128746399	310.14
chr10	128888200	128897999	126.65
chr10	128909200	128912399	19.59
chr10	128925600	128951399	310.14
chr11	3330400	3335199	112.2
chr11	3500600	3509399	20.65
chr11	3514600	3522999	258.88
chr11	3627200	3632999	310.14
chr11	3704400	3706999	55.65
chr11	3758800	3769799	310.14
chr11	3771000	3778799	310.14
chr11	3861000	3869399	310.14
chr11	3906600	3915199	310.14
chr11	3944400	3946999	70.73
chr11	3982400	3985199	179.03
chr11	3995200	4000799	310.14
chr11	4030600	4033599	99.44
chr11	4105800	4122399	223.93
chr11	4186800	4188599	11.37
chr11	4214600	4225399	276.89
chr11	4259600	4273999	310.14
chr11	4737200	4771799	310.14
chr11	4939400	4959799	310.14
chr11	4972800	4985399	77.46
chr11	5049000	5065599	310.14
chr11	5148000	5162199	201.91
chr11	5260400	5263599	10.5
chr11	5443600	5447399	19.51
chr11	5858200	5874599	310.14
chr11	5890600	5906799	310.14
chr11	6006400	6009199	66.13
chr11	6057800	6073599	310.14
chr11	6597600	6607799	310.14
chr11	7052200	7069599	310.14
chr11	7211200	7215799	277.1
chr11	7513000	7519199	12.49
chr11	7520800	7523799	10.05
chr11	9012400	9016199	16.97
chr11	9048200	9054799	146.77
chr11	9113200	9121599	310.14
chr11	9200000	9201399	36.99
chr11	11111600	11119999	310.14
chr11	11681600	11690799	310.14
chr11	12014200	12047599	310.14
chr11	12462200	12467199	310.14
chr11	16255600	16261799	310.14
chr11	16750800	16757999	310.14
chr11	18869200	18877999	60.76
chr11	19007400	19011599	11.94
chr11	19013400	19016599	10.17
chr11	20830400	20833999	10.74
chr11	21985200	22011799	310.14
chr11	22856000	22865999	310.14
chr11	23061600	23064999	41.66
chr11	24058000	24063999	262.15
chr11	24069600	24083799	310.14
chr11	24088600	24092999	13.13
chr11	24279000	24287399	65.31
chr11	24297200	24308599	8.29
chr11	24367000	24374599	14.43
chr11	24669400	24672999	11.76
chr11	25644200	25646599	13.9
chr11	26102000	26107999	77.25
chr11	26109600	26113399	30.47
chr11	28579800	28586199	310.14
chr11	28851600	28855399	93.54
chr11	29823400	29826999	310.14
chr11	30021200	30026599	310.14
chr11	30266000	30269999	49.88
chr11	30752600	30756999	197.89
chr11	30884200	30886399	34.95
chr11	31367600	31374599	310.14
chr11	32158800	32163199	94.24
chr11	32221600	32223999	13.4
chr11	32274800	32283399	47.04
chr11	32286800	32289599	38.67
chr11	32300200	32303999	18.76
chr11	32530400	32534999	202.05
chr11	32866800	32871599	10.13
chr11	32922000	32945199	146.99
chr11	33106200	33112599	13.53
chr11	33142200	33148599	310.14
chr11	33174600	33184399	120.69
chr11	33189200	33211999	310.14
chr11	33679800	33681599	20.79
chr11	33839800	33852599	310.14
chr11	35120800	35127399	94.73
chr11	35543200	35545199	12.61
chr11	35794200	35803199	310.14
chr11	35976600	35989199	310.14
chr11	35997000	36005799	47.51
chr11	36017400	36021999	23.93
chr11	37232000	37239199	107.7
chr11	42179600	42184999	310.14
chr11	42418200	42423199	189.76
chr11	43384800	43387199	20.28
chr11	43474200	43475799	20.36
chr11	43751400	43756399	13.06
chr11	43761800	43766199	12.71
chr11	43767200	43770599	10.93
chr11	43773400	43778199	310.14
chr11	43831000	43838999	310.14
chr11	44610800	44623599	310.14
chr11	44830600	44834799	23.78
chr11	45977400	45982999	310.14
chr11	45990600	45992399	11.34
chr11	46161200	46168999	310.14
chr11	46309400	46314999	81.13
chr11	47983800	47991999	310.14
chr11	48683800	48689799	30.04
chr11	48822800	48830199	107.44
chr11	48835800	48840799	252.98
chr11	48842000	48850999	86.91
chr11	48870200	48872199	11.26
chr11	49166600	49171399	287.75
chr11	49606200	49618999	310.14
chr11	49620600	49646599	310.14
chr11	49893200	49904799	310.14
chr11	49926400	49932199	46.7
chr11	49933400	49939799	16.78
chr11	49953800	49961999	11.89
chr11	50023000	50026199	26.02
chr11	50222800	50227399	17.76
chr11	50230000	50233199	28.53
chr11	50234600	50240799	310.14
chr11	50357000	50362599	189.88
chr11	50456200	50462799	41.39
chr11	50591400	50608599	310.14
chr11	50845000	50855599	310.14
chr11	50928400	50931599	89.31
chr11	51648600	51652599	127.66
chr11	51846000	51860999	310.14
chr11	51897400	51901799	22.13
chr11	51915400	51917199	12.15
chr11	52163000	52171599	310.14
chr11	52187200	52188799	17.92
chr11	52223800	52224999	25.03
chr11	52281800	52287599	39.53
chr11	52313000	52316199	81.19
chr11	52458400	52460999	10.4
chr11	52635400	52646199	16.57
chr11	52760200	52771399	310.14
chr11	53454600	53483799	310.14
chr11	53485400	53493199	310.14
chr11	53495400	53500999	11.25
chr11	53517400	53521599	46.46
chr11	53633400	53638199	140.85
chr11	53756600	53765799	103.84
chr11	53767400	53772199	42.52
chr11	53857400	53859799	55.91
chr11	53889600	53891799	17.12
chr11	53978400	53981599	158.71
chr11	54024800	54030199	310.14
chr11	54099200	54103199	10.33
chr11	54302200	54305999	82.26
chr11	55031600	55033999	21.67
chr11	55075400	55079799	64.55
chr11	55204600	55206399	13.29
chr11	55309800	55316199	75.78
chr11	55598200	55610399	241.2
chr11	57008400	57015599	87.87
chr11	57645000	57647599	13.85
chr11	57667400	57673199	11.98
chr11	57823600	57843599	310.14
chr11	57847600	57850599	13.83
chr11	57929400	57935199	11.38
chr11	58095400	58099199	184.84
chr11	58636800	58643799	264.58
chr11	58941800	58955399	310.14
chr11	58956400	58965599	310.14
chr11	58990000	59003999	310.14
chr11	59126600	59142399	310.14
chr11	59167200	59180999	310.14
chr11	59239200	59245599	21.81
chr11	59247000	59250799	18.17
chr11	59261200	59267599	310.14
chr11	59274400	59294799	310.14
chr11	59296000	59314999	310.14
chr11	59570200	59574199	24.06
chr11	59784600	59788199	53.34
chr11	59962400	59973199	310.14
chr11	60450800	60452599	13.94
chr11	60501800	60521599	310.14
chr11	60896800	60901799	60.17
chr11	61011200	61032999	310.14
chr11	61143600	61149399	201.95
chr11	61207400	61216599	81.67
chr11	61339000	61350199	310.14
chr11	61374600	61382799	310.14
chr11	61451800	61454599	30.84
chr11	61682000	61688599	310.14
chr11	61955400	61960599	310.14
chr11	62010800	62018799	12.07
chr11	62246800	62252999	142.25
chr11	62536600	62541399	310.14
chr11	62559000	62561999	36.82
chr11	62575400	62579199	65.5
chr11	62745400	62746599	10.24
chr11	63128400	63135999	310.14
chr11	63915800	63927399	310.14
chr11	64434000	64437999	41.06
chr11	64519600	64523199	34.71
chr11	64894200	64898599	10.14
chr11	64900400	64905599	55.87
chr11	64970800	64975999	10.93
chr11	65160000	65164199	253.12
chr11	65266800	65274799	31.55
chr11	66204600	66210399	40.65
chr11	66520000	66531199	310.14
chr11	66911600	66914199	10.85
chr11	67079800	67097199	242.06
chr11	67451000	67460799	310.14
chr11	67918400	67922799	310.14
chr11	68274600	68278399	20.5
chr11	68381200	68408999	310.14
chr11	68429200	68435399	111.04
chr11	68553800	68560799	301.18
chr11	68944800	68959399	310.14
chr11	69111600	69122999	129.86
chr11	69129600	69135999	15.3
chr11	69148400	69170999	310.14
chr11	69195200	69200199	310.14
chr11	69227000	69228799	40.8
chr11	69230800	69239599	310.14
chr11	69325600	69333199	310.14
chr11	69338200	69341399	56.38
chr11	69417400	69424399	156.73
chr11	69547000	69551199	20.84
chr11	69555800	69560199	13.29
chr11	69601000	69608999	310.14
chr11	69615600	69617999	12.32
chr11	69765400	69767799	51.06
chr11	69774200	69782999	137.97
chr11	69789600	69809599	310.14
chr11	69830800	69839599	310.14
chr11	69849400	69859999	310.14
chr11	69934000	69952599	310.14
chr11	69954200	69968399	310.14
chr11	70210800	70231199	310.14
chr11	70242800	70259999	310.14
chr11	70315200	70333199	310.14
chr11	70343200	70355599	310.14
chr11	70371800	70377999	8.32
chr11	70457600	70470799	310.14
chr11	70519200	70520799	26.67
chr11	70537600	70545599	310.14
chr11	70615200	70619199	25.56
chr11	71438800	71440999	20.61
chr11	71748000	71757199	310.14
chr11	72026600	72033399	30.11
chr11	72044600	72067599	224.48
chr11	72127400	72145799	310.14
chr11	72246800	72251399	10.58
chr11	72256400	72270199	310.14
chr11	72312400	72319599	310.14
chr11	72406400	72411799	11.76
chr11	72484000	72494799	310.14
chr11	72573800	72579999	40.69
chr11	72957400	72971799	310.14
chr11	73007000	73011399	58.77
chr11	73013200	73029199	310.14
chr11	73155400	73162399	235.84
chr11	73199200	73203999	22.13
chr11	74369000	74375999	15.88
chr11	74517400	74530999	310.14
chr11	74582200	74597599	310.14
chr11	74604600	74627199	310.14
chr11	74635400	74643199	273.43
chr11	75158600	75175799	310.14
chr11	75189400	75206799	310.14
chr11	75210000	75217399	60.35
chr11	75230400	75239199	233.37
chr11	75278200	75289599	310.14
chr11	75291000	75295199	164.82
chr11	75530600	75533799	28.91
chr11	75644200	75662599	310.14
chr11	75788200	75802199	310.14
chr11	75964000	75973799	310.14
chr11	75997800	76003999	111.41
chr11	76026200	76030199	22.88
chr11	76199200	76202999	16.61
chr11	76569400	76572799	142.09
chr11	76619800	76625999	310.14
chr11	76662200	76676599	310.14
chr11	76678200	76680799	11.13
chr11	76845400	76847799	21.8
chr11	76992000	77004999	310.14
chr11	77080800	77083399	21.35
chr11	77167600	77169799	62.91
chr11	77347200	77350199	28.87
chr11	77458800	77473999	310.14
chr11	77486000	77490399	20.7
chr11	77505800	77508999	22.39
chr11	77512400	77520999	310.14
chr11	77623200	77626599	14.57
chr11	77757800	77766599	34.96
chr11	77832200	77878599	310.14
chr11	77879800	77978999	310.14
chr11	78188200	78190399	15.23
chr11	78257600	78261799	10.85
chr11	78412000	78424599	47
chr11	78479200	78504399	310.14
chr11	78921400	78928799	310.14
chr11	78949800	78954999	31.22
chr11	79587000	79597799	310.14
chr11	79660200	79662399	29.45
chr11	79708200	79718399	310.14
chr11	79972200	79975799	310.14
chr11	80151200	80159799	310.14
chr11	80288200	80307399	310.14
chr11	80473800	80480399	81.63
chr11	80601600	80603799	13.67
chr11	80778000	80780199	72.25
chr11	80954400	80959799	38
chr11	81149600	81158399	310.14
chr11	81610000	81615199	27.45
chr11	81964400	81971199	310.14
chr11	82228200	82240199	35.56
chr11	82307400	82311599	14.14
chr11	82348600	82351799	13.6
chr11	82374200	82422199	310.14
chr11	82429200	82451999	310.14
chr11	82508200	82510999	15.17
chr11	82520800	82523399	20.34
chr11	82562000	82568199	14.58
chr11	82596400	82607199	78.94
chr11	82614800	82631599	78.02
chr11	82681200	82685799	10.38
chr11	82925000	82945199	310.14
chr11	82948400	82957799	310.14
chr11	82970800	82971999	10.55
chr11	82991000	82992999	48.65
chr11	83039000	83040799	46.6
chr11	83273400	83278199	11.15
chr11	83407600	83414799	49.08
chr11	83416000	83432399	310.14
chr11	83432600	83454999	310.14
chr11	83459200	83469799	260.05
chr11	83847200	83860399	310.14
chr11	84066000	84072199	286.66
chr11	84513400	84535799	310.14
chr11	84539200	84553799	49
chr11	84559800	84579599	110.67
chr11	84590600	84603199	15.2
chr11	84605400	84611199	13.4
chr11	84631200	84647399	310.14
chr11	84648400	84666799	58.33
chr11	84670600	84687399	110.72
chr11	84691000	84715799	59.21
chr11	84720400	84727799	46.97
chr11	84734200	84740399	10.72
chr11	84755000	84784999	292.89
chr11	84788200	84798999	14.88
chr11	84943000	84947199	25.62
chr11	84955800	84961599	310.14
chr11	85504200	85504599	10.27
chr11	85729200	85736799	11.22
chr11	85770600	85785599	25.39
chr11	85817400	85851599	310.14
chr11	85884200	85908799	310.14
chr11	85909600	85928999	283.68
chr11	86893400	86894199	21.49
chr11	87355400	87364199	310.14
chr11	87467200	87470999	15.29
chr11	87662600	87665399	32.29
chr11	87759600	87769799	310.14
chr11	87776400	87783599	13.31
chr11	87814000	87818999	12.73
chr11	88009000	88011799	24.55
chr11	88096800	88100199	15.51
chr11	88168000	88173999	160.18
chr11	88190000	88195399	310.14
chr11	88274200	88278399	15.49
chr11	88291800	88297999	26.1
chr11	88299400	88305799	13.56
chr11	88326600	88331199	13.43
chr11	88819200	88822999	87.49
chr11	88861800	88864799	18.53
chr11	88870200	88875999	110.33
chr11	88998200	89002999	281.19
chr11	89291800	89303599	310.14
chr11	89539000	89546799	8.34
chr11	90029800	90033599	21.26
chr11	90161400	90162799	10.45
chr11	90386400	90394399	310.14
chr11	90415600	90420999	38.23
chr11	90685800	90688799	104.25
chr11	93096400	93103999	310.14
chr11	94145400	94152199	233.49
chr11	94238400	94245399	39.77
chr11	94389400	94395799	71.48
chr11	94408800	94418799	29.77
chr11	94423600	94426199	44.57
chr11	94428400	94436599	90.75
chr11	94464800	94503599	310.14
chr11	94561000	94570399	310.14
chr11	94871800	94875199	15.39
chr11	94879400	94884799	49.68
chr11	94932000	94943799	126.67
chr11	94990800	94993399	105.68
chr11	95009600	95011999	12.2
chr11	95015800	95021799	85.56
chr11	95032200	95035599	18.88
chr11	95055600	95059599	24.25
chr11	95071200	95079799	310.14
chr11	95117200	95131999	310.14
chr11	95133400	95158399	310.14
chr11	95178600	95243999	310.14
chr11	95506600	95523199	310.14
chr11	95557000	95600999	310.14
chr11	95610000	95615399	32.8
chr11	95621200	95623799	14.8
chr11	95634600	95654799	244.29
chr11	95790400	95799999	310.14
chr11	95820400	95846799	310.14
chr11	95910400	95920399	310.14
chr11	96119600	96129399	310.14
chr11	96141200	96155399	201.21
chr11	96158000	96218399	310.14
chr11	96232600	96239599	32.11
chr11	96250400	96256799	26.02
chr11	96262600	96346799	298.76
chr11	96351400	96355199	14.81
chr11	96362400	96376799	310.14
chr11	96393400	96428199	170.37
chr11	96459400	96466999	310.14
chr11	96706200	96709399	13.93
chr11	96849800	96851199	13.65
chr11	96926600	96934999	310.14
chr11	96995200	97005399	68.56
chr11	97013000	97026399	310.14
chr11	97090800	97105999	162.37
chr11	97109200	97153399	310.14
chr11	97309400	97311599	14.99
chr11	97397600	97419399	310.14
chr11	97431400	97446599	310.14
chr11	97458800	97467399	113.48
chr11	97495800	97526999	310.14
chr11	97528600	97582599	310.14
chr11	97585000	97592999	25.18
chr11	97614400	97620399	94.67
chr11	97622800	97632799	310.14
chr11	97657400	97666999	148.35
chr11	97981800	97988599	310.14
chr11	97993600	97996599	68.58
chr11	97998000	98005999	172.61
chr11	98019200	98022799	18.99
chr11	98033800	98039999	166.77
chr11	98041400	98067399	310.14
chr11	98282600	98358999	310.14
chr11	98374600	98395399	310.14
chr11	98409200	98414399	19.9
chr11	98444600	98452199	108.69
chr11	98453800	98469399	310.14
chr11	98491400	98506799	45.55
chr11	98540000	98551799	310.14
chr11	98597600	98603599	183.48
chr11	98644800	98654399	39.61
chr11	98666200	98672999	27.96
chr11	98700400	98702999	11.9
chr11	98835800	98841199	310.14
chr11	98977600	98986599	310.14
chr11	99396400	99403199	14.39
chr11	99931800	99932399	12.35
chr11	99992800	99996399	59.76
chr11	100143600	100147199	310.14
chr11	100346400	100360999	310.14
chr11	100392600	100399999	207.67
chr11	100413600	100416799	22
chr11	100574600	100578399	13.76
chr11	100624000	100645399	307.67
chr11	100647600	100655199	310.14
chr11	100669600	100679199	121.37
chr11	100684000	100693999	310.14
chr11	100743200	100765599	310.14
chr11	100847400	100865599	310.14
chr11	100953000	100975599	310.14
chr11	100979400	100983799	126.49
chr11	101067800	101074199	54.97
chr11	101076000	101083599	310.14
chr11	101134200	101142199	129.98
chr11	101154800	101185399	310.14
chr11	101243200	101249599	182.56
chr11	101258200	101269599	310.14
chr11	101274800	101277399	15.07
chr11	101456600	101475199	204.01
chr11	101770000	101775999	15.72
chr11	101780800	101789599	299.6
chr11	101801400	101802799	16.94
chr11	101805600	101812199	10.04
chr11	101891400	101895799	13.89
chr11	101916800	101919199	38.97
chr11	101932000	101944399	167.76
chr11	101955200	101973199	310.14
chr11	101980600	101990999	65.29
chr11	102023400	102028799	14.06
chr11	102056400	102063599	30.28
chr11	102069000	102071199	24.3
chr11	102094200	102111799	310.14
chr11	102134400	102140199	12.93
chr11	102142200	102150199	310.14
chr11	102205800	102207399	18.58
chr11	102227600	102231799	56.98
chr11	102244200	102249799	48.13
chr11	102275400	102277999	23.67
chr11	102351000	102354399	10.94
chr11	102355800	102361399	17.24
chr11	102372000	102376799	30.39
chr11	102389400	102414599	310.14
chr11	102436000	102440799	87.48
chr11	102442600	102471199	310.14
chr11	102602200	102608199	71.38
chr11	102662600	102668799	310.14
chr11	102735000	102745399	71.95
chr11	102748200	102781599	310.14
chr11	102818600	102821399	22.7
chr11	102880800	102909199	310.14
chr11	102936200	102976599	310.14
chr11	102982400	103000399	310.14
chr11	103076800	103082999	205.77
chr11	103093400	103107599	310.14
chr11	103109000	103115199	182.85
chr11	103117000	103118199	13.36
chr11	103163000	103203399	310.14
chr11	103213800	103220799	69.56
chr11	103311400	103313199	22.42
chr11	103327800	103346999	310.14
chr11	103352800	103367799	310.14
chr11	103635800	103643999	23.58
chr11	103645800	103662199	310.14
chr11	103711600	103717599	14.18
chr11	103729200	103735599	20.01
chr11	103737200	103756799	310.14
chr11	103762200	103817599	310.14
chr11	104127400	104152399	310.14
chr11	104156200	104160399	17.47
chr11	104195800	104198599	11.68
chr11	104227600	104238799	310.14
chr11	104303800	104312199	310.14
chr11	104316600	104323199	14.29
chr11	104571000	104572799	25.21
chr11	104604600	104612999	289.17
chr11	105149200	105153999	44.47
chr11	105164000	105168399	106.41
chr11	105291800	105295599	20.52
chr11	105454200	105458399	43.82
chr11	105589800	105591199	11.88
chr11	105932600	105947199	310.14
chr11	105964600	105982799	310.14
chr11	106007000	106027999	310.14
chr11	106611200	106613999	22.14
chr11	107024000	107031999	239.38
chr11	107789600	107806199	310.14
chr11	107807800	107816999	179.55
chr11	107910800	107920999	201.94
chr11	108341000	108347799	114.34
chr11	108920600	108925399	17.42
chr11	109010800	109012399	127.54
chr11	109068200	109071799	15.51
chr11	109314000	109316399	13.44
chr11	109439200	109441199	18.46
chr11	109469800	109477799	34.12
chr11	109713800	109724199	310.14
chr11	109869200	109870799	10.66
chr11	110335200	110340199	84.14
chr11	111065200	111068599	53.23
chr11	112197000	112198399	11.16
chr11	112775400	112788999	310.14
chr11	112801400	112813599	47.16
chr11	112840000	112845199	10.37
chr11	112867200	112874599	22.75
chr11	112975000	112979999	10.12
chr11	113120200	113123599	10.31
chr11	113197600	113201599	41.6
chr11	113616000	113625599	310.14
chr11	113708200	113711199	25.69
chr11	114010600	114041799	169.55
chr11	114058000	114073399	310.14
chr11	114215600	114219399	38.43
chr11	114432800	114435199	13.07
chr11	114441400	114447399	16.83
chr11	114466000	114469999	20.38
chr11	114471200	114473799	40.65
chr11	114484400	114497399	78.9
chr11	114506600	114517199	43.72
chr11	114535000	114538399	14.27
chr11	114566400	114572199	99.03
chr11	114634600	114642599	61.65
chr11	114651000	114657999	37.26
chr11	114662200	114669399	67.05
chr11	114674600	114680999	300.58
chr11	114726800	114731199	34.34
chr11	114756000	114798599	310.14
chr11	114849000	114854799	187.82
chr11	115081400	115093799	283.54
chr11	115151400	115158599	151.1
chr11	115159800	115166599	78.65
chr11	115220800	115274199	310.14
chr11	115289200	115300199	310.14
chr11	115302000	115378999	310.14
chr11	115382000	115385999	16.05
chr11	115390800	115394599	14.99
chr11	115440400	115442599	11.56
chr11	115822800	115825799	132.99
chr11	115847000	115868199	310.14
chr11	115880400	115886199	218.89
chr11	115972200	115980999	310.14
chr11	115982400	115993999	42.44
chr11	116103800	116114399	310.14
chr11	116219000	116239999	310.14
chr11	116279000	116301399	310.14
chr11	116329600	116339999	310.14
chr11	116410800	116415599	291.86
chr11	116439400	116460199	310.14
chr11	116498200	116502599	145.72
chr11	116511800	116518599	80.23
chr11	116522800	116536399	310.14
chr11	116587000	116594399	11.12
chr11	116612600	116625999	247.68
chr11	116642600	116664199	310.14
chr11	116692600	116698599	310.14
chr11	116825400	116828199	36.87
chr11	116884200	116889399	23.78
chr11	116903200	116907999	165.81
chr11	116913600	116931999	310.14
chr11	116990000	116998199	310.14
chr11	117000000	117010599	56.45
chr11	117190800	117206799	310.14
chr11	117371600	117432199	310.14
chr11	117433400	117470799	303.55
chr11	117481800	117485999	74.2
chr11	117523000	117527399	33.91
chr11	117593000	117604599	165.16
chr11	117611000	117619799	85.59
chr11	117624000	117629999	310.14
chr11	117650400	117656399	48.21
chr11	117776200	117786999	236.38
chr11	117790000	117794399	11.69
chr11	117809400	117810999	16.76
chr11	117856800	117879999	310.14
chr11	117881200	117897399	310.14
chr11	117927200	117936599	243.96
chr11	117947200	117951999	46.09
chr11	117962200	117970999	310.14
chr11	118352800	118356399	16.08
chr11	118487800	118492199	14.43
chr11	118493600	118507399	310.14
chr11	118549200	118555799	88.08
chr11	118558200	118583999	310.14
chr11	118588200	118618999	264.26
chr11	118673000	118693599	129.19
chr11	118735200	118748999	107.48
chr11	118903000	118923199	310.14
chr11	118971200	118976599	33.72
chr11	118987000	119005599	164.92
chr11	119032400	119069399	310.14
chr11	119070400	119099799	310.14
chr11	119110000	119121799	25.62
chr11	119122400	119149799	286.46
chr11	119152800	119161199	299.04
chr11	119251000	119253599	19.96
chr11	119386000	119396999	310.14
chr11	119506000	119521199	144.12
chr11	119531200	119566399	310.14
chr11	119935600	119945199	41.14
chr11	120009600	120019199	130.59
chr11	120040600	120051999	310.14
chr11	120203800	120205199	12.85
chr11	120233600	120240599	11.78
chr11	120525600	120546599	310.14
chr11	120608000	120609999	70.38
chr11	120645600	120650199	33.7
chr11	120655600	120667199	310.14
chr11	120718400	120727599	268.06
chr11	120760000	120766399	60.61
chr11	120782200	120784799	32.69
chr11	120947800	120950199	19.63
chr11	121152800	121163599	310.14
chr11	121385600	121390799	69.63
chr11	121701800	121709799	310.14
chr11	121829000	121831599	117.3
chr12	3318200	3320799	11.78
chr12	3801600	3813399	310.14
chr12	3953400	3960199	181.28
chr12	3980000	3986399	161.89
chr12	4034800	4042799	310.14
chr12	4132000	4135199	13.5
chr12	4472400	4479799	291.35
chr12	4591400	4595399	96.61
chr12	4838000	4842799	92.52
chr12	4872200	4875199	70.47
chr12	4906800	4907799	18.2
chr12	5371000	5380599	310.14
chr12	8292000	8321799	310.14
chr12	8571800	8573799	18.83
chr12	8947600	8949999	24.31
chr12	9568800	9584999	310.14
chr12	9914200	9914999	16.07
chr12	10961600	10963199	12.71
chr12	11146400	11155199	310.14
chr12	11207200	11211199	21.21
chr12	11433600	11438999	111.02
chr12	11454200	11457399	39.24
chr12	14147000	14155199	310.14
chr12	15813200	15816599	30.4
chr12	16650400	16658999	310.14
chr12	16996000	17002199	62.81
chr12	17010600	17011799	14.34
chr12	17173200	17177799	310.14
chr12	17251400	17255599	40.38
chr12	17321200	17336799	310.14
chr12	17689400	17693999	87.87
chr12	18133800	18136799	310.14
chr12	18387000	18388799	52.34
chr12	19175600	19176999	302.13
chr12	19246800	19247199	25.14
chr12	19288400	19289399	12.71
chr12	20311800	20313199	135.33
chr12	20415200	20416599	53.36
chr12	20814000	20816199	25.21
chr12	20920600	20921399	27.84
chr12	24570000	24576199	310.14
chr12	24677200	24691399	310.14
chr12	25838000	25839199	11.17
chr12	26067600	26069199	30.88
chr12	26468600	26471399	45.8
chr12	28550000	28553399	26.7
chr12	28588000	28592199	21.23
chr12	29525200	29539799	310.14
chr12	29662600	29665599	20
chr12	30102600	30103999	26.84
chr12	30370000	30376799	45.55
chr12	30880000	30888799	310.14
chr12	31018600	31025599	17.72
chr12	31027600	31031599	34.67
chr12	31068800	31077799	310.14
chr12	31264000	31267199	27.64
chr12	31410400	31413599	18.46
chr12	31550400	31564599	310.14
chr12	33033000	33036399	10.21
chr12	33143400	33148199	55.55
chr12	33925800	33931599	310.14
chr12	33953000	33974199	310.14
chr12	34903000	34909199	310.14
chr12	35532800	35535399	300.49
chr12	37105800	37112599	294.1
chr12	37879400	37883399	57.94
chr12	40131200	40135999	310.14
chr12	44221200	44223399	288.81
chr12	44327600	44332399	310.14
chr12	45072200	45075799	13.64
chr12	46397800	46401199	34.48
chr12	46816600	46821399	75.92
chr12	49369400	49409199	310.14
chr12	51590000	51597599	310.14
chr12	53243400	53257199	310.14
chr12	54065200	54070599	310.14
chr12	54161400	54166799	42.74
chr12	54200800	54205399	207.31
chr12	54310600	54317399	53.39
chr12	55503200	55505399	10.15
chr12	55532200	55539199	86.55
chr12	55590200	55602799	310.14
chr12	56298200	56302999	22.37
chr12	56454400	56469399	117.25
chr12	56506800	56544199	310.14
chr12	56606200	56623799	310.14
chr12	56676400	56702999	310.14
chr12	56716400	56720999	16.7
chr12	56831600	56835599	14.76
chr12	57194800	57198199	256.72
chr12	57530200	57556599	310.14
chr12	57569400	57578199	310.14
chr12	58209000	58217399	310.14
chr12	58267200	58269399	26.37
chr12	61518800	61527999	310.14
chr12	64918000	64919199	14.85
chr12	67218200	67227999	310.14
chr12	69787400	69792399	104.4
chr12	69907200	69909799	33.09
chr12	70109800	70115999	118.11
chr12	70343800	70351199	310.14
chr12	71109800	71113199	53.01
chr12	71307400	71311599	21.27
chr12	71407600	71414599	13.87
chr12	72068400	72071999	224.14
chr12	72235600	72241399	33.14
chr12	72405400	72411199	310.14
chr12	72828600	72835199	310.14
chr12	72844000	72851199	53.88
chr12	72852400	72857599	134.15
chr12	72916600	72918999	56.6
chr12	72935400	72953599	310.14
chr12	73032400	73057199	310.14
chr12	73541800	73552599	310.14
chr12	73580000	73589199	310.14
chr12	73722400	73739999	56.97
chr12	73789200	73795999	35.62
chr12	73948800	73950399	33.43
chr12	73993600	74001399	310.14
chr12	74282000	74288399	263.18
chr12	74803800	74804599	10.07
chr12	75173400	75180999	310.14
chr12	75306600	75309599	15.27
chr12	75733200	75735999	85.08
chr12	75815600	75821999	45.88
chr12	76151000	76154799	44.35
chr12	76173600	76179399	138.84
chr12	76324600	76326799	27.34
chr12	76401800	76409199	310.14
chr12	76415800	76419999	78.76
chr12	76434000	76437599	34.02
chr12	76530000	76535999	64.86
chr12	76546200	76548199	21.67
chr12	76706000	76714599	310.14
chr12	76815200	76825599	310.14
chr12	77005400	77010599	8.02
chr12	77044800	77049199	10.93
chr12	77238800	77240599	10.44
chr12	77789200	77791199	12.21
chr12	78226800	78228599	15.45
chr12	78902000	78914399	310.14
chr12	79003200	79008799	310.14
chr12	79028800	79030799	32.79
chr12	79129600	79135199	310.14
chr12	80512800	80525799	310.14
chr12	80686400	80697399	310.14
chr12	80720400	80722799	35.79
chr12	80736000	80763999	310.14
chr12	80922200	80924199	13.3
chr12	80995800	81000799	34.04
chr12	81024600	81028799	198.57
chr12	81327400	81337999	310.14
chr12	81599600	81603599	10.27
chr12	81623600	81636599	310.14
chr12	81777000	81787599	310.14
chr12	82613800	82622199	310.14
chr12	83483600	83490399	293.63
chr12	83763200	83765199	21.26
chr12	83770200	83772999	10.22
chr12	84008400	84010399	12.32
chr12	84037800	84039199	25.54
chr12	84050400	84056799	310.14
chr12	84066400	84073399	310.14
chr12	84100600	84102199	19.18
chr12	84407400	84410399	17.71
chr12	84445800	84450199	11.85
chr12	84561000	84579599	310.14
chr12	84587800	84594399	88.01
chr12	84596000	84599399	28.68
chr12	84622800	84627399	106.51
chr12	84638200	84645999	310.14
chr12	84670600	84673999	28.18
chr12	84680000	84681399	11.5
chr12	84694800	84704599	310.14
chr12	84872400	84885799	310.14
chr12	85138800	85141799	12.05
chr12	85144800	85152199	158.56
chr12	85170200	85178799	13.91
chr12	85180200	85183799	77.99
chr12	85467800	85477399	310.14
chr12	85486000	85487999	17.71
chr12	85597600	85603399	187.87
chr12	85703600	85710999	42.83
chr12	85743800	85749199	102.42
chr12	86075800	86081199	17.42
chr12	86196200	86217399	310.14
chr12	86218800	86223999	238.11
chr12	86359200	86367599	34.98
chr12	86375600	86385399	48.33
chr12	86400600	86405799	34.41
chr12	86411800	86427599	310.14
chr12	86466200	86475399	43.56
chr12	86496400	86522599	147.48
chr12	86551200	86553399	19
chr12	86677200	86680399	13.41
chr12	86881600	86893599	310.14
chr12	86902600	86919599	91.93
chr12	86971800	86997399	310.14
chr12	87010600	87011799	37.29
chr12	87022000	87032799	310.14
chr12	87050800	87057799	14.1
chr12	87095600	87105199	310.14
chr12	87298400	87301799	310.14
chr12	88353600	88354799	21.22
chr12	89809600	89817199	158.37
chr12	91396000	91404599	220.37
chr12	91633000	91639599	8.94
chr12	91776400	91780999	64.66
chr12	95688000	95698399	310.14
chr12	98568600	98580599	310.14
chr12	98734600	98741199	111.4
chr12	98898600	98901999	310.14
chr12	99082000	99084799	15.73
chr12	99959400	99973199	310.14
chr12	100894600	100910599	310.14
chr12	100975200	101020999	142.91
chr12	101023200	101029999	310.14
chr12	101715000	101721399	310.14
chr12	101816800	101822599	56.98
chr12	102126200	102135199	310.14
chr12	102281800	102289199	140.58
chr12	102550800	102560399	310.14
chr12	102703400	102707799	32.83
chr12	102946600	102953799	310.14
chr12	103235000	103245799	262.58
chr12	103310600	103330199	232.7
chr12	103367200	103369999	14.15
chr12	103530200	103534199	310.14
chr12	104465800	104496399	310.14
chr12	104508200	104513399	92.43
chr12	104530400	104536399	21.48
chr12	104633200	104640999	50.38
chr12	104863000	104865799	26.41
chr12	105002800	105014599	310.14
chr12	105334800	105339999	310.14
chr12	105560600	105568399	112.71
chr12	105868600	105872399	13.8
chr12	105883600	105885599	14.07
chr12	105932200	105938599	35.64
chr12	105954600	105965199	310.14
chr12	106170200	106180799	310.14
chr12	106378400	106379799	14.81
chr12	106474000	106484999	310.14
chr12	106527000	106538799	93.29
chr12	107026200	107029799	13.38
chr12	107969400	108014399	310.14
chr12	108271000	108281199	209.61
chr12	108301200	108323399	310.14
chr12	108324800	108344199	310.14
chr12	108348000	108358199	310.14
chr12	108698200	108705599	310.14
chr12	109026200	109073599	310.14
chr12	109445600	109465199	310.14
chr12	109472800	109480199	28.8
chr12	109538800	109543599	10.27
chr12	109609800	109615799	14.09
chr12	110133000	110134799	10.27
chr12	110183000	110197199	310.14
chr12	110259400	110299199	310.14
chr12	110372000	110378599	111.32
chr12	110416400	110418599	23.83
chr12	110427000	110437599	26.91
chr12	110597000	110601999	18.88
chr12	110718000	110722999	114.68
chr12	110728000	110730599	19.41
chr12	110734000	110738799	70.19
chr12	110843800	110849199	46.44
chr12	111267800	111279799	310.14
chr12	111394200	111465799	310.14
chr12	111473600	111492999	310.14
chr12	111537400	111540399	163.77
chr12	111665600	111678399	310.14
chr12	111903800	111912399	310.14
chr12	112111200	112137199	310.14
chr12	112139800	112153599	310.14
chr12	112194600	112202199	12.23
chr12	112214000	112226199	17.79
chr12	112298000	112303999	16.26
chr12	112464200	112481799	17.21
chr12	112493600	112513199	142.55
chr12	112585000	112590999	167.47
chr12	112606800	112627799	189.33
chr12	112676200	112691399	310.14
chr12	112692600	112710999	175.22
chr12	112717600	112725399	310.14
chr12	112790800	112815399	310.14
chr12	112864600	112882199	310.14
chr12	112906200	112935399	310.14
chr12	113084800	113090199	18.09
chr12	113135400	113158199	310.14
chr12	113183800	113192799	154.97
chr12	114378600	114379199	15.72
chr12	116074600	116081599	181.05
chr12	116483600	116489599	227.92
chr12	116640200	116642999	28.53
chr12	117148400	117167599	310.14
chr12	117532200	117536799	310.14
chr12	117688600	117689599	10.35
chr12	117786800	117788999	12.75
chr12	117804800	117810999	8.76
chr12	117989600	117993999	17.5
chr12	118195400	118200199	276.17
chr12	118455600	118459199	18.62
chr12	118526400	118532399	310.14
chr12	118659400	118662399	10.18
chr12	118811200	118812399	15.09
chr12	118834400	118851599	310.14
chr12	118853000	118856799	14.13
chr12	119945400	119949399	36.11
chr13	3340600	3347399	52.93
chr13	3356400	3362999	310.14
chr13	6646000	6652199	127.61
chr13	8200800	8205199	165.97
chr13	10355800	10364599	310.14
chr13	12099600	12109199	310.14
chr13	12392600	12394399	14.07
chr13	12515400	12522399	120.95
chr13	12565800	12567799	41.69
chr13	13590400	13591999	15.19
chr13	13781800	13788799	310.14
chr13	14518600	14525399	310.14
chr13	16009200	16019399	310.14
chr13	18215800	18220199	16.45
chr13	18947200	18950799	141.53
chr13	19621200	19625399	172.93
chr13	20088400	20091799	40.79
chr13	21219400	21221199	100.32
chr13	21242600	21244999	73.82
chr13	21466400	21470799	13.84
chr13	21978000	21988799	310.14
chr13	21992800	22015799	310.14
chr13	22017400	22020799	39.62
chr13	23286200	23290199	13.94
chr13	23309400	23316399	239.64
chr13	23394200	23396799	106.8
chr13	23400800	23412999	69.48
chr13	23989000	23996199	185.58
chr13	24279000	24282199	69.86
chr13	24634400	24640999	310.14
chr13	24936400	24939999	37.14
chr13	24953400	24956599	34.33
chr13	25050000	25060199	310.14
chr13	28883200	28889599	310.14
chr13	30134200	30139599	199.22
chr13	30334800	30339199	29.08
chr13	30745600	30756199	310.14
chr13	30984800	30989799	29.69
chr13	31077000	31081999	22.82
chr13	31554000	31567599	310.14
chr13	31607800	31636799	310.14
chr13	31792800	31825599	310.14
chr13	31854000	31859799	14.25
chr13	31964200	31970199	10.25
chr13	31971800	31976199	10.71
chr13	32028000	32033399	57.01
chr13	32034000	32040799	43.76
chr13	32042200	32045799	20.14
chr13	32050000	32054599	29.11
chr13	32056200	32063599	35.01
chr13	32802200	32803399	23.52
chr13	34077000	34079999	17.69
chr13	34129000	34135199	128.2
chr13	34340800	34348399	310.14
chr13	34643600	34657799	310.14
chr13	34961000	34967199	310.14
chr13	35737400	35742399	246.17
chr13	35967000	35970799	227.45
chr13	36721000	36737399	310.14
chr13	37309000	37314999	117.61
chr13	37432600	37438199	136.2
chr13	37476200	37479199	11.11
chr13	37776800	37785199	310.14
chr13	38141400	38146199	13.09
chr13	38149000	38154999	310.14
chr13	38342400	38350799	310.14
chr13	39821400	39825799	47.95
chr13	40699800	40721799	310.14
chr13	40722800	40747799	310.14
chr13	40886200	40888199	12
chr13	40916200	40920399	56.45
chr13	41076400	41085199	119.52
chr13	41109200	41116799	247.69
chr13	41605800	41607399	46.11
chr13	42299600	42307199	299.9
chr13	42678600	42685399	55.22
chr13	42707200	42713599	310.14
chr13	42865400	42868199	59.86
chr13	42914800	42919199	252.57
chr13	43296200	43307799	310.14
chr13	43615000	43617999	39.22
chr13	43781800	43788599	310.14
chr13	44100800	44101999	12.1
chr13	44673000	44675199	25.21
chr13	44869400	44870199	46.74
chr13	45506200	45510799	58.37
chr13	45960200	45967199	190.29
chr13	46413400	46420599	214
chr13	46501800	46504199	45.37
chr13	47009200	47018199	272.87
chr13	47042000	47047999	258.29
chr13	47120200	47124799	155.01
chr13	47191600	47196599	267.61
chr13	47854200	47857399	21.5
chr13	48260000	48265199	310.14
chr13	48624400	48627199	9.68
chr13	48650800	48683199	310.14
chr13	48721000	48750199	310.14
chr13	49014600	49016999	35.87
chr13	49024000	49027399	59.51
chr13	49139400	49151799	310.14
chr13	49212000	49226599	28.28
chr13	49238800	49253999	310.14
chr13	51166600	51175799	310.14
chr13	51405800	51412799	35.46
chr13	51562800	51572399	310.14
chr13	51590800	51599199	178.64
chr13	51790600	51796399	310.14
chr13	51836800	51854799	67.75
chr13	51914000	51923399	111.03
chr13	52527600	52531799	310.14
chr13	52581200	52585399	310.14
chr13	52978400	52983999	86.58
chr13	53282200	53286799	24.7
chr13	53383200	53389999	13.87
chr13	53452600	53478999	310.14
chr13	54052800	54056799	310.14
chr13	54188200	54195199	310.14
chr13	54280000	54286199	51.37
chr13	54369000	54375599	266.97
chr13	54570600	54575799	59.76
chr13	54608400	54611999	268.31
chr13	54730200	54770399	310.14
chr13	54780800	54812199	310.14
chr13	54867800	54878199	310.14
chr13	54878800	54888399	15.77
chr13	54905200	54915599	310.14
chr13	54930000	54970799	310.14
chr13	54973400	54995399	18.67
chr13	55150400	55161799	303.59
chr13	55328200	55329599	10.65
chr13	55367600	55387199	310.14
chr13	55398200	55404799	11.14
chr13	55406000	55423599	310.14
chr13	55469800	55473599	32.65
chr13	55491200	55496199	14.19
chr13	55820400	55862399	310.14
chr13	55962000	55967799	20.49
chr13	56196800	56200799	21.85
chr13	56207800	56209399	15.59
chr13	56212400	56238199	310.14
chr13	56245000	56267999	310.14
chr13	56287800	56301999	310.14
chr13	56420800	56443599	310.14
chr13	56749200	56758399	310.14
chr13	56759600	56765199	19.97
chr13	57672800	57677999	14.34
chr13	57904800	57912199	310.14
chr13	58270600	58278399	310.14
chr13	58356600	58360799	27.89
chr13	58450800	58455999	276.22
chr13	58469600	58473599	161.05
chr13	58520600	58524799	13.78
chr13	58608600	58612599	100.67
chr13	58631000	58634399	20.6
chr13	58804000	58812799	310.14
chr13	59058000	59060599	12.63
chr13	59073000	59075799	17.86
chr13	59724600	59726999	10.13
chr13	61665600	61666799	40.45
chr13	62811800	62813599	18.34
chr13	62886400	62890999	310.14
chr13	63270200	63272999	18.05
chr13	63567800	63577399	310.14
chr13	63900600	63903999	194.44
chr13	63942400	63958399	136.86
chr13	64159800	64165199	87.49
chr13	64273800	64276199	11.69
chr13	64903600	64904999	15.16
chr13	65175600	65176999	33.23
chr13	65256400	65263399	310.14
chr13	65351600	65352599	15.57
chr13	67353600	67355199	48.11
chr13	68595600	68598799	53.24
chr13	68996000	69001799	197.33
chr13	69480000	69484799	230.66
chr13	69486400	69490599	190.76
chr13	69609200	69611199	27.72
chr13	69701600	69705799	163.79
chr13	69734000	69742799	310.14
chr13	70839800	70845399	310.14
chr13	71453600	71463799	52.44
chr13	71655400	71661799	31.25
chr13	71947600	71973399	310.14
chr13	72120600	72122999	10.23
chr13	72345400	72346799	12.68
chr13	72619800	72651599	310.14
chr13	72812800	72819599	310.14
chr13	72893000	72901199	24.09
chr13	73064800	73075399	18.47
chr13	73254200	73279599	310.14
chr13	73422200	73423599	10.91
chr13	73525600	73542599	310.14
chr13	73563600	73573599	9.11
chr13	73586800	73598399	29.79
chr13	73731600	73735799	88.57
chr13	73748200	73750999	12.37
chr13	73844200	73848799	158.03
chr13	74002000	74018399	310.14
chr13	74070400	74080199	12.52
chr13	74115800	74129599	310.14
chr13	74257400	74262399	35.51
chr13	74290000	74295999	122.36
chr13	74403600	74408399	32.85
chr13	75088600	75091599	103.96
chr13	75706800	75709999	272.62
chr13	76051200	76059199	310.14
[truncated: 7,867 more rows]

## Sheet: ATAC
Chrom	Start	End	-log10(pvalue)
chr1	3670382	3672755	82.09
chr1	4491437	4494016	46.12
chr1	4496384	4497676	12.15
chr1	4571110	4572490	65.72
chr1	4785183	4786251	24.04
chr1	4807288	4808469	41.3
chr1	4843494	4844253	11.01
chr1	4855496	4856216	6.76
chr1	4857089	4858829	106.16
chr1	5017766	5020371	19.83
chr1	5022568	5023260	7.09
chr1	5082589	5083818	43.91
chr1	5587963	5589194	27.31
chr1	5916223	5917451	12.11
chr1	6213930	6215649	73.31
chr1	6358776	6359712	11.02
chr1	6382450	6383453	22.62
chr1	6440982	6441951	19.03
chr1	7087784	7089860	211.39
chr1	7397184	7398867	164.04
chr1	7777042	7777804	17.14
chr1	9298193	9299025	18.53
chr1	9544666	9546261	97.1
chr1	9547810	9548985	7.07
chr1	9564459	9565654	14.33
chr1	9699458	9701194	75.93
chr1	9747670	9749066	112.43
chr1	9797587	9798853	14.23
chr1	9848035	9848809	9.07
chr1	9943590	9944807	44.43
chr1	10008706	10009605	18.98
chr1	10037182	10038530	35.95
chr1	10039176	10040561	60.33
chr1	10231589	10233627	71.05
chr1	10993142	10994845	50.68
chr1	11329153	11330724	26.52
chr1	11413682	11414942	33.05
chr1	12398029	12398863	11.15
chr1	12691701	12693273	48.62
chr1	12717969	12718937	13.08
chr1	12989949	12991282	22.77
chr1	12991859	12993148	20.59
chr1	13371956	13375020	206.68
chr1	13588929	13590538	51.08
chr1	13659536	13661052	48.53
chr1	14309319	14310379	26.09
chr1	14506106	14507767	31.51
chr1	14635531	14636235	7.04
chr1	14754985	14756248	15.52
chr1	14842213	14843210	16.34
chr1	14918547	14919244	7.37
chr1	15286143	15287777	36.46
chr1	15451535	15452305	14.53
chr1	15805067	15806462	55.19
chr1	15892203	15893195	19.11
chr1	16092753	16093734	24.22
chr1	16103842	16106723	161.53
chr1	16126958	16127726	8.39
chr1	16229396	16230282	20.28
chr1	16248656	16249731	42.01
chr1	16293044	16294690	22.5
chr1	16518379	16520428	55.7
chr1	16618362	16619984	71.26
chr1	16656003	16657888	143.04
chr1	16664826	16665868	28.02
chr1	16688195	16689233	13.56
chr1	17096515	17098404	64.64
chr1	17123302	17124032	12.06
chr1	17145070	17146007	24.86
chr1	17726623	17728177	65.8
chr1	18057742	18059193	18.84
chr1	19209610	19210722	8.28
chr1	19236425	19237142	9.52
chr1	20819845	20820901	78.84
chr1	20890103	20891601	40.17
chr1	20951002	20952257	83.96
chr1	21078289	21080072	90.02
chr1	21165878	21167033	30.17
chr1	21218241	21219116	20.54
chr1	21960309	21962391	39.31
chr1	22293119	22293936	9.59
chr1	22532921	22534371	37.64
chr1	22805554	22806585	23.59
chr1	23061750	23062580	18.91
chr1	23255614	23257447	103.97
chr1	23382360	23384056	101.71
chr1	23761587	23763461	45.31
chr1	23792653	23793354	10.37
chr1	23921542	23922821	35.97
chr1	24005120	24006144	46.61
chr1	24099196	24101531	87.01
chr1	24134616	24135391	8.96
chr1	24194743	24196801	49.87
chr1	24302470	24303208	8.95
chr1	24586088	24587039	14.85
chr1	24612517	24613358	310
chr1	24678009	24679628	67.59
chr1	25228403	25229130	8.43
chr1	25829588	25831028	30.51
chr1	26685893	26688601	142.98
chr1	30414794	30415618	15.17
chr1	30872620	30874543	75.94
chr1	30948172	30950849	112.04
chr1	31058767	31059411	10.72
chr1	31149379	31150371	23.43
chr1	31793120	31794612	33.55
chr1	32172074	32173310	59.07
chr1	33173616	33174375	12.82
chr1	33669103	33670823	31
chr1	33719504	33720626	32.11
chr1	33757245	33758269	23.33
chr1	33813677	33815007	52.04
chr1	33907166	33908484	34.4
chr1	33969776	33970684	10.54
chr1	34005400	34006290	9.99
chr1	34010862	34012470	28.31
chr1	34103477	34104213	7.66
chr1	34127651	34128292	6.79
chr1	34236042	34236992	35.29
chr1	34432644	34433657	10.98
chr1	34434497	34435624	31.71
chr1	34438908	34440514	116.3
chr1	34459205	34460460	25.86
chr1	34472555	34473444	8.99
chr1	34801327	34802499	23.16
chr1	34842214	34843791	49.31
chr1	34849632	34850410	9.91
chr1	35869521	35870341	7.71
chr1	36016885	36017765	15.34
chr1	36064609	36065524	19.98
chr1	36067697	36069040	40.82
chr1	36243583	36244730	36.89
chr1	36252609	36253475	8.82
chr1	36277148	36277790	6.37
chr1	36307183	36308353	38.94
chr1	36368347	36369709	38.98
chr1	36444674	36445862	53.69
chr1	36470879	36472460	59.06
chr1	36492241	36492934	7.26
chr1	36511265	36513269	83.28
chr1	36546526	36548053	91.36
chr1	36555477	36559798	169.65
chr1	36580087	36581062	16.66
chr1	36634729	36635521	10.34
chr1	36683933	36684670	8.87
chr1	36691008	36691987	34.12
chr1	36709068	36710540	84.77
chr1	36938764	36940394	50.6
chr1	37028937	37029807	25.69
chr1	37299346	37300644	29.72
chr1	37429584	37430699	38.37
chr1	37540612	37541648	35.92
chr1	37719270	37720180	11.97
chr1	37864164	37865881	182.65
chr1	37871682	37872757	22.93
chr1	37889979	37890867	17.14
chr1	37996558	37998840	130.87
chr1	38128536	38130568	80.62
chr1	38545309	38546174	9.75
chr1	38606676	38607435	10.26
chr1	38626269	38628501	39.02
chr1	38631379	38632388	12.34
chr1	38766606	38767640	34.76
chr1	38835594	38836614	8.83
chr1	38897647	38898405	12.13
chr1	38987066	38988309	70.01
chr1	39367299	39368566	57.82
chr1	39477921	39479334	42.99
chr1	39535110	39536574	65.46
chr1	39576268	39577936	79
chr1	39650369	39651327	18.54
chr1	39735944	39736763	10.99
chr1	39761209	39762006	9.78
chr1	39899875	39902238	64.76
chr1	39936273	39937058	11.91
chr1	40266107	40267121	14.19
chr1	40790128	40791115	27.82
chr1	41389944	41390686	16.41
chr1	41652090	41653190	10.73
chr1	42693903	42696283	26.87
chr1	42714135	42715084	10.76
chr1	42850653	42851802	51.36
chr1	42917765	42918530	14.21
chr1	42952421	42953754	20.2
chr1	43091936	43093210	28.43
chr1	43098046	43099367	61.17
chr1	43139406	43140149	13.67
chr1	43163432	43164500	24.49
chr1	43444667	43447118	107.14
chr1	43827026	43828525	99.36
chr1	43898759	43899709	14.93
chr1	43933191	43934716	130.68
chr1	44101607	44103365	74.22
chr1	44118149	44120573	140.35
chr1	44147313	44148553	63.84
chr1	44551223	44552949	54.95
chr1	44678775	44679941	11.44
chr1	44849280	44849988	8.2
chr1	45311217	45312310	12.37
chr1	45502009	45503460	27.68
chr1	45794722	45796132	78.06
chr1	45904900	45905858	27.1
chr1	45925171	45926433	27.96
chr1	46066379	46067491	39.91
chr1	46425071	46426038	11.52
chr1	46852172	46854553	169.45
chr1	50926462	50928412	55.51
chr1	51333452	51334610	21.74
chr1	51477521	51479139	104.99
chr1	51596768	51597719	13.62
chr1	51650103	51651108	22.54
chr1	51696935	51698105	21.95
chr1	51914681	51916839	62.62
chr1	52113156	52114364	51.61
chr1	52118900	52119857	19.7
chr1	52146352	52147171	8.07
chr1	52231804	52233947	131.22
chr1	52499698	52501146	18.5
chr1	52630226	52631501	58.62
chr1	52726694	52727650	12.71
chr1	52816759	52818159	29.68
chr1	52844086	52845658	114.78
chr1	52952369	52953529	15.13
chr1	53296481	53297618	63.52
chr1	53313167	53314108	22.1
chr1	53352231	53353115	55.22
chr1	53706256	53707239	27.48
chr1	53784368	53785694	40.24
chr1	53823518	53824365	10.26
chr1	54193913	54195536	37.11
chr1	54250123	54251355	81.89
chr1	54438384	54439420	21.4
chr1	54557005	54558422	48.13
chr1	54906810	54907757	16.08
chr1	54925419	54927050	46.79
chr1	54960436	54961277	10.45
chr1	55026596	55028047	63.69
chr1	55052022	55053590	110.31
chr1	55086843	55088850	154.27
chr1	55130578	55132157	80.11
chr1	55226212	55227016	9.96
chr1	55236664	55239055	48.82
chr1	55362924	55364150	24.93
chr1	55383034	55383750	12.36
chr1	55405426	55406686	31.91
chr1	56965807	56966593	8.13
chr1	56971379	56974105	89
chr1	56976917	56977998	15.3
chr1	57205305	57206041	9.69
chr1	57377037	57378550	64.78
chr1	57405976	57407242	31.79
chr1	57429523	57430546	10.16
chr1	57773754	57775940	53.48
chr1	57969264	57970634	40.11
chr1	57995474	57996734	46.42
chr1	58296096	58296893	10.07
chr1	58392354	58394239	69.77
chr1	58423092	58424516	34.63
chr1	58444923	58446041	22.63
chr1	58504421	58505493	39.99
chr1	58585896	58586874	22.83
chr1	58711038	58713704	37.52
chr1	58972854	58974402	70.98
chr1	59119400	59120649	33.54
chr1	59236599	59238528	78.98
chr1	59269835	59270973	17.12
chr1	59321922	59323037	16.67
chr1	59333962	59334964	11.75
chr1	59394414	59395276	7.06
chr1	59480724	59484897	112.79
chr1	59515879	59516940	31.24
chr1	59520079	59521107	17.45
chr1	59603729	59604463	8.16
chr1	59623194	59623914	7.27
chr1	59669829	59671353	39.54
chr1	59684347	59685681	44.45
chr1	59762034	59765144	104.39
chr1	59912211	59914138	87.31
chr1	60042463	60043597	17.27
chr1	60097224	60099388	74.15
chr1	60179863	60181367	141.53
chr1	60342701	60344125	56.55
chr1	60408613	60410552	87.33
chr1	60565073	60567589	86.22
chr1	61233265	61234622	13.4
chr1	61297898	61298678	12.33
chr1	61638375	61639573	14.84
chr1	62382762	62383688	14.18
chr1	62647574	62648757	22.61
chr1	62700879	62701644	13.82
chr1	62702810	62704091	38.13
chr1	62706037	62707226	16.81
chr1	62766504	62767382	13.99
chr1	62779665	62780600	11.28
chr1	62795377	62796146	9.96
chr1	63112853	63115099	47.35
chr1	63175801	63177828	64.57
chr1	63179963	63181747	39.81
chr1	63203858	63204991	32.1
chr1	63246797	63248533	34.84
chr1	63272618	63273788	18.11
chr1	63445711	63446609	9.64
chr1	63552761	63553578	14.44
chr1	63729956	63731084	25.55
chr1	64120648	64122839	146.59
chr1	64380961	64381802	11.45
chr1	64445798	64446527	9.68
chr1	64531719	64533849	135.41
chr1	64616535	64618175	62.78
chr1	64690064	64691945	97.14
chr1	64734489	64735396	12.2
chr1	64735447	64736664	21.86
chr1	64736859	64739322	95.91
chr1	64878558	64879500	16.25
chr1	64956279	64957407	23.24
chr1	65177746	65180364	127.22
chr1	65185927	65187453	83.3
chr1	66003775	66004966	41.21
chr1	66174679	66175964	33.13
chr1	66467681	66468816	24.55
chr1	66700314	66701507	45.43
chr1	66815743	66818460	108.08
chr1	66862539	66863712	22.25
chr1	67038282	67039286	27.77
chr1	67061235	67061994	11.14
chr1	68787463	68788222	15.75
chr1	69105818	69107421	17.48
chr1	69107680	69109058	14.15
chr1	69466555	69467506	13.96
chr1	69686784	69688190	52.54
chr1	69688778	69689559	12.41
chr1	69826508	69827574	36.05
chr1	71102002	71103679	147.89
chr1	71507090	71507791	7.69
chr1	71556516	71558288	93.82
chr1	71652341	71654450	104.86
chr1	71837066	71838425	21.3
chr1	72123401	72124200	10.37
chr1	72141714	72142445	9.24
chr1	72211572	72212746	18.49
chr1	72225384	72227438	61.05
chr1	72236050	72237627	25.51
chr1	72243432	72245125	93.22
chr1	72254223	72256107	88.74
chr1	72283802	72284872	57.29
chr1	72306662	72308322	48.85
chr1	72536785	72537651	14.63
chr1	72582699	72584028	65.85
chr1	72710803	72711762	15.3
chr1	72823676	72825770	22.23
chr1	72869966	72871624	11.64
chr1	72873461	72874334	11.38
chr1	73363205	73364502	46.73
chr1	73758021	73759394	30.51
chr1	73826035	73826864	10.06
chr1	73862450	73863303	17.91
chr1	73901223	73902962	22.55
chr1	73962606	73963583	15.46
chr1	74000408	74001987	17.56
chr1	74030788	74031823	16.73
chr1	74036643	74037491	7.68
chr1	74041358	74042328	23.74
chr1	74053794	74054910	13.08
chr1	74090265	74092870	35.61
chr1	74098065	74099557	21.95
chr1	74124136	74125732	21.4
chr1	74235766	74237417	49.61
chr1	74274616	74275806	15.27
chr1	74283829	74285927	141.83
chr1	74295307	74296312	15.75
chr1	74303504	74304564	21.74
chr1	74331750	74333123	77.91
chr1	74361614	74362419	12.62
chr1	74367927	74368736	8.21
chr1	74386409	74387624	39.17
chr1	74389595	74390943	13.3
chr1	74390962	74393341	71.31
chr1	74396898	74398698	112.7
chr1	74505082	74507134	143.29
chr1	74587270	74588809	127.68
chr1	74600807	74601915	24.35
chr1	74661054	74662422	48.9
chr1	74712875	74714190	35.55
chr1	74715259	74716159	14.71
chr1	74748535	74749257	7.49
chr1	74772880	74773704	15.17
chr1	74787656	74788427	10.21
chr1	74797131	74797936	14.11
chr1	74802771	74804069	28
chr1	74806015	74806919	6.97
chr1	74807386	74808732	23.44
chr1	74816300	74817581	40.97
chr1	74854367	74855466	27.69
chr1	74880599	74881365	8.93
chr1	74892940	74893942	7.62
chr1	74948643	74950089	12.57
chr1	74951114	74952074	10.95
chr1	74964259	74965249	13.27
chr1	75124098	75125646	60.38
chr1	75142179	75143574	48.03
chr1	75167983	75169576	74.74
chr1	75179626	75181380	51.72
chr1	75191259	75192657	68.19
chr1	75210325	75211354	31.97
chr1	75218745	75220103	14.05
chr1	75235898	75237452	46.31
chr1	75251403	75252145	7.95
chr1	75314730	75318544	245.88
chr1	75338192	75339080	7.12
chr1	75343848	75345673	44.24
chr1	75359880	75360856	15.38
chr1	75381378	75383381	28.17
chr1	75387776	75389169	13.11
chr1	75398451	75399465	30.46
chr1	75399543	75400552	22.46
chr1	75421324	75422444	12.92
chr1	75422570	75423841	15.13
chr1	75435464	75436493	23.97
chr1	75445415	75448119	37.17
chr1	75457642	75458953	27.61
chr1	75467328	75468274	17.07
chr1	75476979	75478105	24.16
chr1	75478149	75480298	105.33
chr1	75486858	75488522	39.53
chr1	75494945	75495742	9.04
chr1	75505009	75506980	58.81
chr1	75521015	75522248	37.05
chr1	75545742	75547167	32.68
chr1	75558764	75560248	33.79
chr1	75662163	75663208	9.4
chr1	75833273	75833961	7.28
chr1	75844316	75845596	14.72
chr1	77514017	77516840	48.31
chr1	78216882	78217695	8.95
chr1	78337987	78338790	8.45
chr1	78488254	78489719	50.87
chr1	78649091	78649830	8.28
chr1	78657187	78659050	107.9
chr1	79439629	79440482	16.48
chr1	79671408	79672577	21.17
chr1	79760691	79762291	43.31
chr1	79775593	79776597	34.17
chr1	79857874	79859620	29.32
chr1	79982630	79983374	14.97
chr1	80339073	80341758	110.67
chr1	80757872	80759254	17.95
chr1	81593329	81594286	21.91
chr1	81608477	81609392	23.78
chr1	81744337	81745120	7.86
chr1	81916660	81917494	11.15
chr1	82135710	82136500	14.04
chr1	82282699	82284329	67.92
chr1	82289651	82292103	78.28
chr1	82292526	82293485	32.97
chr1	82315982	82317272	52.12
chr1	82433135	82433931	7.93
chr1	82724498	82725589	37.42
chr1	82838924	82840307	40.98
chr1	83075915	83076660	9.57
chr1	83159305	83160285	31.1
chr1	83407718	83408772	20.94
chr1	83870966	83871840	15.57
chr1	84284092	84284994	14.66
chr1	84549239	84550198	14.84
chr1	84695315	84696706	28.19
chr1	84838185	84841008	99.88
chr1	84933422	84935451	32.23
chr1	85703243	85704164	19.25
chr1	85792876	85794842	47.2
chr1	85893953	85896180	84.2
chr1	85933586	85934518	12.67
chr1	86017959	86019022	16.73
chr1	86045555	86046919	18.5
chr1	86058924	86060059	34.32
chr1	86063651	86065448	60.58
chr1	86154199	86155232	63.56
chr1	86178628	86179417	9.85
chr1	86213984	86214755	7.47
chr1	86302751	86304161	33.74
chr1	86339239	86340225	11.59
chr1	86342796	86344560	17.54
chr1	86358400	86361133	190.33
chr1	86363617	86364318	8.29
chr1	86429799	86430534	11
chr1	86433404	86435974	107.66
chr1	86439428	86444053	68.69
chr1	86486850	86488396	93.47
chr1	86500758	86505346	179.92
chr1	86508764	86510099	22.32
chr1	86520224	86520992	8.21
chr1	86523870	86530068	310
chr1	86530536	86534179	192.95
chr1	86581593	86583358	98.3
chr1	86586639	86587654	20.96
chr1	86632652	86633475	10.41
chr1	86669196	86671016	41.89
chr1	86703104	86704442	35.1
chr1	87035336	87036341	13.79
chr1	87098401	87099180	10.07
chr1	87173970	87174993	18.64
chr1	87175484	87176420	11.96
chr1	87186301	87187586	19.13
chr1	87213372	87215402	65.24
chr1	87245954	87246807	13.63
chr1	87270500	87271370	9.34
chr1	87326353	87327935	87.37
chr1	87509326	87510865	17.06
chr1	87755439	87756762	42.89
chr1	87852662	87854229	31.01
chr1	88007894	88008847	17.41
chr1	88205185	88206205	29.83
chr1	88226366	88227488	11.31
chr1	88233482	88234226	6.92
chr1	88234588	88236103	21.62
chr1	88236468	88238097	18.32
chr1	88238116	88241277	39.3
chr1	88247523	88248467	13.35
chr1	88248972	88250835	12.67
chr1	88252155	88254137	14.7
chr1	88254346	88262337	142.18
chr1	88262994	88264708	25.35
chr1	88265253	88266774	18.48
chr1	88274023	88278741	209.19
chr1	88279432	88280722	11.64
chr1	88284167	88285502	15.79
chr1	88456506	88457271	7.18
chr1	88474424	88475963	16.75
chr1	88700924	88702975	57.24
chr1	88705579	88706414	17.44
chr1	89069435	89071444	133.73
chr1	89109632	89110378	9.04
chr1	89166665	89167696	13.25
chr1	89190918	89191952	21.99
chr1	89453564	89456038	64.83
chr1	89576770	89577647	9.44
chr1	89579641	89582162	39.76
chr1	89763796	89764470	8.76
chr1	89849063	89850394	11.76
chr1	89922652	89923806	11.26
chr1	89927014	89927897	13.14
chr1	89929822	89932027	58.95
chr1	89940095	89940921	14.87
chr1	90119007	90119828	15.15
chr1	90152956	90153989	32.68
chr1	90201966	90203087	36
chr1	90203531	90204565	21.06
chr1	90205079	90205881	7.52
chr1	90279970	90280785	9.93
chr1	90334627	90335744	18.83
chr1	90602936	90603960	34.2
chr1	90650443	90652133	25.23
chr1	90743662	90744692	31.16
chr1	90749987	90750769	8.28
chr1	90956528	90957309	9.44
chr1	90972961	90973795	16.1
chr1	91052473	91053714	50.07
chr1	91076492	91077503	7.58
chr1	91098736	91099468	7.98
chr1	91249533	91251531	68.11
chr1	91297693	91299389	38.07
chr1	91346719	91347482	11.62
chr1	91365856	91367328	29.18
chr1	91397683	91399336	42.55
chr1	91412224	91414881	100.54
chr1	91458135	91460155	106.83
chr1	91483149	91484163	9.94
chr1	91494168	91495488	19.76
chr1	91539506	91541341	75.7
chr1	91600317	91601752	32.13
chr1	91731252	91732226	10.28
chr1	91754910	91755689	11.11
chr1	91769998	91771280	24.51
chr1	91799168	91802398	71.6
chr1	91816277	91817369	15.21
chr1	91844313	91845474	30.42
chr1	91873372	91874203	12.01
chr1	91874446	91875189	7.12
chr1	91952630	91953532	10.62
chr1	92083778	92084590	9.34
chr1	92179318	92181538	174.03
chr1	92473254	92474613	38.52
chr1	92641460	92642528	30.82
chr1	92647559	92649327	18.46
chr1	92680691	92681506	8.19
chr1	92696634	92697456	10.62
chr1	92772248	92773241	16.36
chr1	92774510	92775764	12.81
chr1	92790487	92792157	59.15
chr1	92830874	92833626	84.83
chr1	92833650	92834579	13.64
chr1	92894905	92895661	11.93
chr1	92902455	92903392	21.08
chr1	92906457	92907997	64.03
chr1	92910203	92912755	39.45
chr1	92933888	92935214	79.96
chr1	93014261	93015014	10.92
chr1	93100730	93102263	16.77
chr1	93114802	93115691	40.55
chr1	93128547	93129389	9.78
chr1	93160325	93161220	12.11
chr1	93174076	93175080	15.04
chr1	93175409	93177972	74.06
chr1	93220597	93221451	6.2
chr1	93235109	93237034	55.37
chr1	93238114	93238768	10.17
chr1	93305408	93306332	20.86
chr1	93342295	93344255	131.93
chr1	93444493	93446264	56.8
chr1	93477672	93480070	191.03
chr1	93511112	93512864	114.39
chr1	93617766	93619057	25.05
chr1	93634511	93636602	114.56
chr1	93667539	93669395	35.92
chr1	93685128	93687218	56.51
chr1	93753618	93755716	88.28
chr1	93801139	93802496	56.41
chr1	93803075	93805027	170.33
chr1	93824317	93826685	81.76
chr1	94034673	94036065	67.09
chr1	94078839	94079706	17.03
chr1	94712525	94713362	12.91
chr1	94795892	94796635	9.19
chr1	95313089	95314724	78.39
chr1	95451627	95452213	9.95
chr1	95666948	95668276	55.66
chr1	96362470	96363387	14.38
chr1	97660429	97662737	75.18
chr1	97769045	97771288	107.27
chr1	97974792	97975530	8.26
chr1	97976562	97977769	36.02
chr1	98047419	98048348	26.34
chr1	98094703	98096323	74.16
chr1	98189770	98190744	17.38
chr1	99772008	99772724	18.91
chr1	104768087	104769750	31.08
chr1	104932715	104933634	14.57
chr1	104993792	104994564	11.11
chr1	105355997	105357232	20.28
chr1	105662810	105665011	112.42
chr1	105780203	105781260	19.03
chr1	105880686	105881647	12.95
chr1	105989624	105992017	151.9
chr1	105993206	105994465	44.16
chr1	106170514	106173667	221.16
chr1	106395279	106396052	11.38
chr1	106712109	106713049	13.15
chr1	106713360	106715657	58.54
chr1	106758497	106760745	133.78
chr1	106795908	106797198	72.41
chr1	106901266	106901986	10.41
chr1	110447613	110448329	9.21
chr1	111699126	111699985	9.94
chr1	111863807	111865621	120.33
chr1	112378515	112379278	9.26
chr1	112379584	112380474	14.89
chr1	112416417	112417326	15.95
chr1	115684333	115685081	11.14
chr1	118310540	118312421	76.92
chr1	118321288	118322880	37.56
chr1	118388212	118390493	106.46
chr1	118458552	118460192	105.25
chr1	118498084	118498827	10.15
chr1	118627511	118628566	23.63
chr1	118759190	118760161	15.35
chr1	118768665	118769567	9.82
chr1	118772132	118772744	6.78
chr1	118776414	118777257	14.69
chr1	118824904	118826207	20.88
chr1	118877914	118878965	12.68
chr1	118880553	118881484	17.58
chr1	118901672	118902875	24.48
chr1	118904276	118905677	59.98
chr1	118917220	118918330	20.7
chr1	118981665	118983443	35.47
chr1	119001420	119002404	12.08
chr1	119033307	119034473	29.78
chr1	119047421	119049323	25.44
chr1	119051634	119055076	120.22
chr1	119083361	119084266	14.72
chr1	119087248	119088135	10.76
chr1	119305251	119306039	10.39
chr1	119420902	119421861	11.8
chr1	119504081	119505598	122.87
chr1	119525271	119527021	65.71
chr1	119648107	119649463	58.5
chr1	119836472	119838213	119.17
chr1	119912722	119913770	33.76
chr1	119996812	119997934	28.79
chr1	120006779	120007629	9.25
chr1	120032787	120033609	12.66
chr1	120073460	120074691	20.37
chr1	120120000	120121945	80.43
chr1	120197009	120197688	9.52
chr1	120264725	120265775	27.41
chr1	120372201	120373007	8.96
chr1	120594369	120595233	12.11
chr1	120601897	120603375	16.63
chr1	120741001	120742004	18.76
chr1	120859343	120860244	17.75
chr1	120961742	120962568	11.13
chr1	121327098	121328360	47.14
chr1	121430547	121432194	46.8
chr1	121527490	121529030	36.51
chr1	121567302	121568520	39.52
chr1	121756116	121757259	16.89
chr1	121770537	121771585	17.68
chr1	123841236	123842028	7.82
chr1	124845464	124846173	7.93
chr1	124956950	124957743	8.42
chr1	125223003	125223966	14.32
chr1	125434497	125436614	141.92
chr1	125559952	125561880	192.05
chr1	125911251	125912505	18.13
chr1	126431439	126432174	12.71
chr1	126492270	126493062	9.38
chr1	126511388	126512717	19.91
chr1	126597250	126598025	8.86
chr1	126600367	126601383	15.91
chr1	126931639	126932424	12.12
chr1	126993113	126993839	6.96
chr1	127204476	127206690	69
chr1	127442523	127443559	19.82
chr1	127458834	127459614	12.13
chr1	127531026	127531891	12.89
chr1	127537143	127538104	11.63
chr1	127677208	127678222	12.75
chr1	127772935	127775074	150.69
chr1	127868228	127869409	42.99
chr1	127985181	127985916	7.69
chr1	128102042	128104261	186.6
chr1	128243558	128245205	105.87
chr1	128357852	128360787	86.75
chr1	128416352	128417917	71.91
chr1	128471848	128473100	26.2
chr1	128591264	128593649	36.17
chr1	128642881	128644002	27.02
chr1	128832381	128833474	11.56
chr1	129148634	129149334	6.79
chr1	129272700	129273963	14.55
chr1	129675861	129676531	11.07
chr1	129837554	129838278	9.93
chr1	130299641	130301075	35.66
chr1	130462092	130463268	39.12
chr1	130633774	130634498	8.03
chr1	130715028	130718178	104.41
chr1	130731521	130732340	12.89
chr1	131003222	131004685	16.93
chr1	131030980	131031900	11.69
chr1	131052954	131054197	16.54
chr1	131096317	131098297	77.26
chr1	131137579	131139644	59.36
chr1	131152820	131153671	24.78
chr1	131181373	131182143	8.02
chr1	131244253	131246268	36.19
chr1	131260187	131260940	9.05
chr1	131269479	131270813	24.9
chr1	131524884	131529295	292.44
chr1	131657753	131658679	14.81
chr1	131765340	131766217	14.72
chr1	131796984	131797918	15.94
chr1	131827131	131829016	73.8
chr1	131866837	131867864	30.54
chr1	131909503	131911861	110.18
chr1	131962422	131964085	22.92
chr1	131970476	131972944	36.56
chr1	131981356	131982235	25.32
chr1	131982707	131983560	10.2
chr1	132007038	132008772	66.46
chr1	132046031	132046970	12.64
chr1	132067439	132068347	18.17
chr1	132121003	132121803	8.36
chr1	132138728	132140122	24.24
chr1	132155589	132156631	12.5
chr1	132157073	132158430	29.84
chr1	132189577	132192633	36.45
chr1	132304377	132305266	12.53
chr1	132309474	132310177	7.08
chr1	132312489	132313304	8.24
chr1	132315637	132316640	28.01
chr1	132333434	132334407	15.89
chr1	132355584	132356370	9.21
chr1	132367380	132368273	11.53
chr1	132389966	132392301	43.34
chr1	132416969	132418493	74.18
chr1	132476473	132477908	30.54
chr1	132525278	132526322	11.18
chr1	132540947	132541828	15.86
chr1	132594454	132595124	6.88
chr1	132741351	132742170	12.87
chr1	132758396	132759453	13.98
chr1	132879902	132881473	27.91
chr1	132934758	132935562	13.89
chr1	133024786	133025903	44.66
chr1	133033191	133034644	34.81
chr1	133045505	133047226	38.11
chr1	133087367	133088089	8.15
chr1	133130570	133132494	100.27
chr1	133180776	133182145	24.29
chr1	133187808	133188473	8.14
chr1	133236673	133238361	30.03
chr1	133362947	133364940	65.7
chr1	133381732	133382593	10.53
chr1	133385379	133386165	9.68
chr1	133408251	133409957	51.1
chr1	133422473	133424709	42.18
chr1	133492481	133493984	27.89
chr1	133525532	133526273	12.4
chr1	133596432	133597227	8.9
chr1	133609555	133611007	61.6
chr1	133660441	133661889	41.83
chr1	133736013	133736764	12.33
chr1	133800670	133801549	14.28
chr1	133855219	133856116	11.82
chr1	134060532	134061721	42.46
chr1	134062747	134063995	20.39
chr1	134078212	134079805	66.48
chr1	134092566	134093629	30.4
chr1	134098744	134099907	38
chr1	134151458	134152264	12.72
chr1	134243730	134244795	16.47
chr1	134331787	134332966	10.82
chr1	134343505	134345289	58.57
chr1	134361365	134362454	41.41
chr1	134405542	134406717	31.76
chr1	134414636	134416233	92.42
chr1	134454684	134456027	25.02
chr1	134494152	134495462	58.71
chr1	134516445	134517218	14.65
chr1	134518559	134519205	11.65
chr1	134555073	134557603	71.28
chr1	134559735	134561486	39.83
chr1	134646107	134647141	13.19
chr1	134708761	134709752	12.34
chr1	134954996	134956458	57.12
chr1	134962069	134963004	38.95
chr1	134987330	134988269	15.63
chr1	135109965	135110838	9.45
chr1	135112492	135113259	7.34
chr1	135132302	135133120	9.31
chr1	135146127	135148065	52.48
chr1	135154183	135155083	12.15
chr1	135198810	135200001	9.48
chr1	135258035	135259587	25.3
chr1	135283385	135284494	33.87
chr1	135313052	135314309	51.29
chr1	135324316	135325154	16.01
chr1	135367575	135369672	25.17
chr1	135373844	135375893	74.62
chr1	135429790	135431147	32.6
chr1	135510067	135511031	19.61
chr1	135540102	135540812	7.18
chr1	135578907	135579727	10.89
chr1	135582830	135586299	28.29
chr1	135619838	135620581	7.8
chr1	135659150	135660422	29.18
chr1	135670152	135671022	18.09
chr1	135686575	135688861	54.35
chr1	135699027	135699937	11.71
chr1	135700517	135701178	7.47
chr1	135728755	135729678	19.73
chr1	135752641	135753360	29.84
chr1	135765623	135767013	41.61
chr1	135811104	135811843	7.79
chr1	135818466	135819389	13.44
chr1	135846955	135847875	13.02
chr1	135850525	135851339	8.94
chr1	135865357	135866098	6.34
chr1	135945530	135946224	7.05
chr1	136007313	136008568	20.99
chr1	136017108	136019004	63.9
chr1	136045686	136046352	10.81
chr1	136050686	136052042	23.73
chr1	136118649	136119531	10.43
chr1	136130616	136132252	73.73
chr1	136136439	136137796	19.63
chr1	136139734	136140887	32.88
chr1	136169798	136170760	32.43
chr1	136173908	136174683	9.75
chr1	136232944	136235141	71.26
chr1	136259480	136260968	18.84
chr1	136345067	136346929	70.32
chr1	136414667	136415986	74.69
chr1	136465749	136467285	76.32
chr1	136518479	136519560	27.16
chr1	136524764	136525519	8.82
chr1	136588555	136589470	21.61
chr1	136624224	136626098	96.42
chr1	136768714	136769571	10.4
chr1	136948596	136950038	24.18
chr1	137323032	137324489	13.38
chr1	137898066	137899338	44.66
chr1	137899827	137900854	25.19
chr1	137927779	137928410	12.17
chr1	138247474	138248267	7.07
chr1	138344673	138345564	19.89
chr1	138384792	138386465	40.58
chr1	138617648	138618614	41.34
chr1	138618747	138620552	106.85
chr1	138730841	138731573	6.82
chr1	138836436	138838934	34.62
chr1	138841177	138842894	25.23
chr1	138843053	138844206	15.5
chr1	138847172	138849353	34.62
chr1	138856567	138857315	24.26
chr1	138912779	138913493	7.1
chr1	138962593	138964635	71.92
chr1	139048712	139049493	9.48
chr1	139091758	139093355	32.72
chr1	139193737	139194619	15.31
chr1	139207339	139208544	20.68
chr1	139376586	139377405	13.49
chr1	139379041	139379919	7.67
chr1	139421438	139423090	85.14
chr1	139453554	139455816	145.15
chr1	140245160	140246477	70.39
chr1	143701618	143703663	74.64
chr1	143739081	143740665	65.26
chr1	143776148	143778398	141.25
chr1	143813725	143814620	18.55
chr1	144003620	144005327	109.6
chr1	144006463	144007131	8.4
chr1	144406436	144407192	10.55
chr1	146497300	146499138	20.6
chr1	149960582	149961601	11.99
chr1	150099352	150100614	34.48
chr1	150164800	150165794	12.82
chr1	150391750	150394176	226.82
chr1	150480433	150481313	18.84
chr1	150537235	150538342	12.93
chr1	150540027	150540860	12.24
chr1	150593401	150594199	11.67
chr1	150681698	150682708	36.92
chr1	150991541	150994205	77.56
chr1	150994391	150995275	20.56
chr1	151062117	151062950	13
chr1	151078786	151079332	10.01
chr1	151177369	151178309	16.28
chr1	151342918	151345787	148.86
chr1	151427785	151429401	143.51
chr1	151499782	151501572	101.81
chr1	151570929	151572039	13.25
chr1	151754600	151756292	137.89
chr1	152019043	152019796	9.05
chr1	152088656	152091338	65.35
chr1	152386057	152387089	22.02
chr1	152399685	152400708	10.99
chr1	152524809	152525599	11.11
chr1	152622559	152623585	15.72
chr1	152624389	152625970	48.34
chr1	152687020	152688336	32.34
chr1	152765740	152767474	93.59
chr1	152767987	152768738	12.86
chr1	152790773	152791826	11.76
chr1	152901585	152904142	117.04
chr1	152904320	152905190	19.54
chr1	152955985	152956814	13.18
chr1	153047910	153048739	9.2
chr1	153091476	153092885	19.9
chr1	153096175	153096898	8.41
chr1	153331712	153333896	143.8
chr1	153424638	153425786	20.93
chr1	153450374	153451837	17.64
chr1	153452595	153453830	13.82
chr1	153486302	153488261	86.41
chr1	153549264	153550204	14.04
chr1	153556755	153557618	9.2
chr1	153641304	153642130	11.63
chr1	153652837	153653500	6.86
chr1	153739888	153740729	11.82
chr1	153748935	153750004	18.3
chr1	153898862	153901737	130.56
chr1	154786041	154786778	8.7
chr1	155006329	155007154	23.09
chr1	155025684	155026564	16.04
chr1	155048786	155049616	11.67
chr1	155082508	155084410	134.47
chr1	155097666	155100247	88.56
chr1	155158088	155159580	81.92
chr1	155210516	155211568	6.89
chr1	155211806	155214023	52.31
chr1	155215104	155216263	15.84
chr1	155216457	155217450	11.94
chr1	155223693	155224959	28.75
chr1	155229418	155230470	21.84
chr1	155243699	155245336	60.1
chr1	155281208	155282076	19.27
chr1	155415203	155416007	10.88
chr1	155416401	155418363	78.95
chr1	155527203	155528498	17.12
chr1	155557662	155559063	37.02
chr1	155740822	155743588	41.97
chr1	155784463	155785283	11.66
chr1	155811989	155813816	80.13
chr1	155972266	155974342	112.87
chr1	156035150	156037032	169.98
chr1	156040009	156041331	42.47
chr1	156108222	156108995	11.09
chr1	156184012	156184788	14.16
chr1	156204402	156205311	8.96
chr1	156420379	156421550	26.29
chr1	156473709	156474814	49.03
chr1	156558070	156559793	71.77
chr1	156613759	156614744	18.24
chr1	156615227	156616297	18.39
chr1	156673423	156674864	22.65
chr1	156718107	156720007	93
chr1	156741532	156742621	12.1
chr1	156751758	156753040	39.37
chr1	156780604	156782727	39.04
chr1	156796005	156796765	6.68
chr1	156838190	156839307	29.68
chr1	156852231	156852974	9.48
chr1	156922932	156923519	8.32
chr1	156938422	156940603	83.33
chr1	157076041	157077685	28.34
chr1	157079097	157080212	13.34
chr1	157081196	157082054	11.54
chr1	157085851	157087293	24.64
chr1	157411400	157413018	94.33
chr1	157458067	157459635	33.52
chr1	157535953	157537035	11.56
chr1	157552771	157553567	15.77
chr1	157560341	157561214	10.5
chr1	158355720	158356807	26.94
chr1	158362225	158363144	11.36
chr1	158596920	158597872	26.68
chr1	158670054	158670699	10.85
chr1	158713126	158713939	9.69
chr1	158953312	158954141	13.37
chr1	159135122	159135882	10.48
chr1	159231463	159232532	72.99
chr1	159232650	159233499	10.1
chr1	159523872	159524627	12.54
chr1	159812518	159813526	13.03
chr1	160044019	160044984	18.69
chr1	160080766	160081561	9.73
chr1	160194197	160196093	146.78
chr1	160211934	160214601	161.08
chr1	160351228	160352552	19.68
chr1	160377413	160378593	13.08
chr1	160649539	160650729	14.87
chr1	160791633	160793581	68.47
chr1	160905698	160907669	118.64
chr1	161033620	161037893	207.8
chr1	161038017	161042367	205.62
chr1	161069943	161071574	92.03
chr1	161130857	161131862	31.99
chr1	161142311	161143184	14.03
chr1	161170447	161171340	18.63
chr1	161195206	161196637	41.72
chr1	161249360	161251815	70.01
chr1	161875569	161878397	203.01
chr1	161968624	161969750	65.9
chr1	161976129	161976988	13.83
chr1	161983176	161984850	18.26
chr1	161999333	162000497	13.53
chr1	162016672	162017644	15.22
chr1	162017905	162018681	8.99
chr1	162020030	162021139	24.12
chr1	162074925	162075996	11.56
chr1	162076380	162077327	20.8
chr1	162216427	162218493	91.02
chr1	162224619	162226246	20.4
chr1	162242957	162244013	14.99
chr1	162253999	162254814	8.65
chr1	162281523	162282693	29.72
chr1	162313391	162314210	12.01
chr1	162324295	162325000	7.27
chr1	162346264	162347091	11.75
chr1	162359005	162359958	12.03
chr1	162477188	162478492	39.69
chr1	162547554	162549104	63.34
chr1	162569952	162571743	129.6
chr1	162664838	162666261	40.18
chr1	162739629	162741153	71.8
chr1	162832019	162832853	15.42
chr1	163150262	163151079	11.62
chr1	163159695	163160639	16.56
chr1	163176611	163177648	22.08
chr1	163238790	163239615	8.7
chr1	163308525	163309822	11.58
chr1	163311582	163312882	20.54
chr1	163313028	163315609	70.62
chr1	163355325	163356989	14.73
chr1	163357761	163358725	24.57
chr1	163374055	163375155	24.47
chr1	163403224	163404391	61.38
chr1	163443720	163444733	21.07
chr1	163460909	163461928	14.65
chr1	163574550	163575468	13.89
chr1	163617747	163618754	13.68
chr1	163779022	163780296	92.79
chr1	163843690	163844476	17.76
chr1	163852834	163853854	21.75
chr1	163897938	163898866	15.98
chr1	163929375	163930840	29.56
chr1	163994100	163995561	48.13
chr1	164138513	164139326	8.33
chr1	164151387	164152134	12.62
chr1	164247663	164250276	144.87
chr1	164275234	164276256	24.34
chr1	164306552	164308127	90.5
chr1	164433788	164434737	14.4
chr1	164457301	164459302	66.07
chr1	164898529	164899590	24.36
chr1	165018471	165019421	16.01
chr1	165046415	165047300	9.52
chr1	165120246	165121027	10.02
chr1	165193548	165194927	43.7
chr1	165236003	165237606	113.55
chr1	165281115	165282941	57.84
chr1	165320361	165321134	7.77
chr1	165327569	165328338	8.12
chr1	165459107	165462222	263.28
chr1	165503362	165504220	9.21
chr1	165583333	165584212	15.28
chr1	165585458	165586204	7.83
chr1	165594585	165595525	8.07
chr1	165616864	165617699	11.92
chr1	165633766	165635540	128.22
chr1	165640828	165643644	114.09
chr1	165700920	165702177	14.83
chr1	165702219	165703304	21.01
chr1	165707493	165708505	15.03
chr1	165735937	165736747	11.45
chr1	165747879	165748598	10.48
chr1	165763011	165764826	66.74
chr1	165771275	165772207	14.21
chr1	165780249	165781283	13.1
chr1	165836030	165837082	14.45
chr1	165840637	165841430	12.46
chr1	165865060	165865830	7.49
chr1	166000763	166003861	169.62
chr1	166045114	166046189	27.88
chr1	166048052	166049979	42.14
chr1	166153233	166153888	7.35
chr1	166154016	166154857	9.62
chr1	166231451	166232193	10.12
chr1	166253666	166254675	18.26
chr1	166282364	166283379	31.23
chr1	166308692	166309881	20.98
chr1	166349123	166350318	15.31
chr1	166360012	166360784	9.77
chr1	166378083	166380493	120.1
chr1	166408590	166410379	45.52
chr1	166964417	166965077	7.86
chr1	167000287	167001735	22.95
chr1	167002046	167003019	19.11
chr1	167212156	167212857	9.13
chr1	167220386	167221374	14.19
chr1	167283396	167285857	98.11
chr1	167308015	167309223	63.47
chr1	167349481	167351071	69.35
chr1	167369593	167370550	20.79
chr1	167374141	167375011	14.65
chr1	167393242	167394834	76.71
chr1	167598057	167598949	15.39
chr1	167688116	167690104	13.77
chr1	167754489	167755422	9.12
chr1	167802520	167803603	19.13
chr1	167888608	167889301	12.64
chr1	167915064	167915808	9.23
chr1	167929543	167930620	22.49
chr1	168213983	168214794	14.79
chr1	168229901	168230789	12.61
chr1	168382044	168383460	20.86
chr1	168391961	168392771	12.44
chr1	168431173	168432999	120.78
chr1	168964277	168965049	12.43
chr1	169027641	169028504	9.62
chr1	169051199	169052020	10.68
chr1	169238304	169239296	27.26
chr1	169458757	169459915	24.78
chr1	169530834	169532644	47.23
chr1	169916555	169917247	6.6
chr1	169917795	169918502	10.48
chr1	169919055	169919937	13.3
chr1	169968575	169969848	87.64
chr1	170110022	170111358	26.72
chr1	170174228	170175604	57.58
chr1	170214660	170215753	12.72
chr1	170292392	170293091	7.85
chr1	170438529	170439305	10.57
chr1	170499540	170500412	15.96
chr1	170588962	170590300	20.43
chr1	170613009	170613836	13.91
chr1	170643980	170645106	50.38
chr1	170867289	170868203	28.6
chr1	170868282	170869215	20.36
chr1	170884763	170885847	30.95
chr1	170907215	170908308	7.38
chr1	171032958	171034345	31.84
chr1	171036343	171037351	12.45
chr1	171037634	171039624	29.5
chr1	171074294	171074718	19.44
chr1	171101511	171103837	77.09
chr1	171110512	171112539	68.81
chr1	171113671	171114423	11.55
chr1	171118212	171118859	8.22
chr1	171150063	171151612	38.34
chr1	171195868	171196642	7.38
chr1	171220524	171221399	13.2
chr1	171221524	171223234	97.98
chr1	171246566	171248115	50.35
chr1	171250223	171252865	34.94
chr1	171269589	171271252	48.09
chr1	171279436	171282239	99.48
chr1	171287049	171288546	65.81
chr1	171293769	171295346	22.63
chr1	171328429	171330644	120.59
chr1	171345164	171346391	43.75
chr1	171359946	171362082	86.93
chr1	171379687	171380732	18.39
chr1	171386999	171387779	8.85
chr1	171410721	171412537	68.41
chr1	171435113	171435988	15.96
chr1	171437004	171438272	40.62
chr1	171439638	171440845	10.44
chr1	171477757	171478527	11.15
chr1	171500729	171504584	131.93
chr1	171508909	171509999	11.14
chr1	171514584	171517521	50.69
chr1	171517958	171518835	16.36
chr1	171524751	171525895	17.57
chr1	171526354	171527618	14.69
chr1	171527685	171529604	23.43
chr1	171529897	171532096	54.23
chr1	171532175	171534150	37.07
chr1	171539975	171541802	55.46
chr1	171542111	171543172	14.58
chr1	171546340	171548849	24.23
chr1	171550908	171552241	24.92
chr1	171553201	171554474	17.9
chr1	171554560	171555802	20.1
chr1	171555917	171557073	11.34
chr1	171557972	171561638	56.02
chr1	171562716	171564872	61.26
chr1	171564929	171566515	22.56
chr1	171566545	171567366	13.97
chr1	171568268	171569628	28.7
chr1	171578927	171580170	8.66
chr1	171815564	171816303	8.53
chr1	172011836	172012610	11.32
chr1	172026232	172029089	85.58
chr1	172053387	172054522	11.54
chr1	172063121	172063928	9.72
chr1	172082161	172083351	54.83
chr1	172125921	172127502	38.66
chr1	172143081	172144005	9.91
chr1	172147375	172149123	102.55
chr1	172203197	172205135	24.93
chr1	172205834	172207370	53.83
chr1	172216807	172217684	19.7
chr1	172221113	172222406	16.71
chr1	172308814	172310890	62.58
chr1	172310923	172313246	71.96
chr1	172317185	172318524	11.37
chr1	172324449	172325109	12.5
chr1	172325450	172326777	20.33
chr1	172340614	172341976	16.98
chr1	172350005	172350962	11.88
chr1	172357349	172358147	9.12
chr1	172368556	172369500	14.23
chr1	172375605	172377741	99.5
chr1	172480851	172483739	75.03
chr1	172490037	172490961	14.76
chr1	172496763	172498404	9.24
chr1	172499319	172502428	102.56
chr1	172520167	172521650	64.4
chr1	172525063	172526051	15.59
chr1	172528366	172529298	18.43
chr1	172530292	172531469	32.64
chr1	172531997	172533240	24.11
chr1	172550211	172551089	8.98
chr1	172561768	172563931	68.96
chr1	172594355	172595060	8.51
chr1	172616907	172618779	29.73
chr1	172631411	172633795	133.97
chr1	173023479	173024615	9.38
chr1	173349625	173350553	22.32
chr1	173366939	173368427	25.01
chr1	173377287	173378067	8.53
chr1	173389876	173390623	10.41
chr1	173821377	173822225	10
chr1	173954878	173956049	23.06
chr1	174501387	174503898	86.12
chr1	174921267	174922231	26.39
chr1	175028543	175029393	12.77
chr1	175035094	175036064	18.68
chr1	175491526	175493185	42.46
chr1	175624712	175626427	127.75
chr1	175668787	175669560	8.5
chr1	175691529	175694147	254.66
chr1	175880122	175881518	64.28
chr1	175936078	175937082	25.02
chr1	176274319	176275971	40.77
chr1	176812863	176815391	272.79
chr1	176994027	176995673	16.63
chr1	176998703	177000085	22.15
chr1	177188524	177189324	11.88
chr1	177256904	177259431	119.79
chr1	177338533	177339370	17.39
chr1	177441146	177443816	193.86
chr1	177517809	177519823	31.45
chr1	177702102	177703411	24.55
chr1	177794549	177797271	179.04
chr1	177982712	177983896	69.85
chr1	178186959	178188176	91.56
chr1	178275609	178277055	22.08
chr1	178317043	178322422	244.03
chr1	178322682	178324070	18.44
chr1	178326788	178327802	10.06
chr1	178335558	178339243	175.84
chr1	178368462	178369924	47.89
chr1	178405179	178407357	119.08
chr1	178463440	178464315	14.89
chr1	178527061	178531314	133.91
chr1	178590061	178591212	19.09
chr1	178661027	178662063	22.78
chr1	178676990	178677830	12.06
chr1	178707831	178708614	12.33
chr1	178728044	178728870	9.01
chr1	178919925	178920832	9.44
chr1	178959927	178960882	18.16
chr1	178978321	178979268	17.07
chr1	179059553	179061286	47.17
chr1	179061447	179062434	19.65
chr1	179142931	179143944	10.97
chr1	179197013	179199332	39.43
chr1	179207005	179207898	15.44
chr1	179446278	179447152	16.52
chr1	179461172	179461932	7.12
chr1	179473733	179475335	23.07
chr1	179516770	179518468	32.31
chr1	179545839	179547154	81.78
chr1	179581686	179582492	10.33
chr1	179645376	179646315	23.96
chr1	179667398	179669399	49.71
chr1	179802489	179804494	140.61
chr1	179844672	179845520	8.65
chr1	179847380	179848603	20.58
chr1	179859055	179859934	9.9
chr1	179959210	179960877	53.43
chr1	180194925	180196665	91.47
chr1	180214861	180215624	8.45
chr1	180225663	180226824	15.84
chr1	180255439	180256854	54.7
chr1	180268340	180269186	11.07
chr1	180283856	180284806	15.47
chr1	180313635	180314394	7.92
chr1	180330160	180332847	52.35
chr1	180364883	180365858	32.13
chr1	180386822	180388189	82.26
chr1	180406925	180408170	17.82
chr1	180421874	180422766	10.64
chr1	180432919	180433826	16.54
chr1	180433853	180435202	22.59
chr1	180482724	180483804	13.92
chr1	180547632	180548571	10.08
chr1	180568341	180569694	53.32
chr1	180639861	180642285	72.1
chr1	180696432	180697627	12.99
chr1	180725128	180726811	58.53
chr1	180763052	180764556	19.45
chr1	180767504	180769313	48.49
chr1	180777172	180778858	83.21
chr1	180793344	180794804	26.63
chr1	180812295	180814871	140.76
chr1	180847826	180848952	25.87
chr1	180850039	180851890	114.21
chr1	180873883	180874642	7.21
chr1	180888178	180889452	15.35
chr1	180903671	180905089	35.44
chr1	180941996	180942964	7.72
chr1	180945407	180946213	8.92
chr1	180974136	180974924	11.07
chr1	181016518	181017967	20.58
chr1	181143491	181144851	56.03
chr1	181150513	181151667	20.37
chr1	181210608	181212797	57.7
chr1	181234023	181235030	11.12
chr1	181255868	181257644	27.79
chr1	181272566	181273692	30.62
chr1	181352066	181353244	20.05
chr1	181545208	181545963	10.99
chr1	181841269	181843219	98.01
chr1	181888351	181889510	19.52
chr1	182018426	182021020	76.69
chr1	182113763	182114791	9.32
chr1	182124176	182125597	56.93
chr1	182139748	182140922	12.64
chr1	182281063	182283643	71.54
chr1	182340827	182342018	20.76
chr1	182407952	182410009	108.11
chr1	182489549	182490488	24.84
chr1	182516642	182518050	31.66
chr1	182573960	182574785	8.82
chr1	182763400	182765393	33.19
chr1	182908210	182909034	14.54
chr1	182954298	182955387	18.14
chr1	182959762	182960807	31.78
chr1	182982795	182984161	36.77
chr1	182990789	182991529	7.99
chr1	183101610	183102752	6.54
chr1	183146397	183148133	48.17
chr1	183188748	183189839	36.93
chr1	183220987	183221908	20.18
chr1	183296307	183298645	74.95
chr1	183298798	183299790	138.83
chr1	183344722	183346107	24.05
chr1	183368387	183370515	81.89
chr1	183388457	183389504	38.38
chr1	183441988	183442790	11.38
chr1	184032796	184035362	191.5
chr1	184045932	184046827	8.43
chr1	184440803	184441727	11.96
chr1	184644909	184645738	10.37
chr1	184727280	184728306	13.36
chr1	184731314	184733622	71.34
chr1	184771243	184772147	12.54
chr1	184792995	184794076	19.82
chr1	184824315	184825109	8.88
chr1	184845215	184846370	35.18
chr1	184851948	184852899	19.43
chr1	184853052	184854054	14.01
chr1	184882225	184883511	24.12
chr1	184999089	185000700	27.85
chr1	185203612	185204716	45.12
chr1	185216157	185217362	23.57
chr1	185328479	185329874	40.39
chr1	185331734	185332619	22.64
chr1	185362414	185364115	65.64
chr1	185454294	185455557	24.95
chr1	185730836	185731796	33.52
chr1	186116684	186117768	33.39
chr1	186182371	186183136	7.64
chr1	186267171	186267978	13.86
chr1	186482159	186482875	10.11
chr1	186702708	186703520	6.96
chr1	186703957	186704867	9.06
chr1	186704910	186706510	47.89
chr1	186721742	186722467	7.72
chr1	186748718	186749770	26.33
chr1	187215020	187216016	34.09
chr1	187448027	187448753	8.12
chr1	187651561	187652325	8.95
chr1	187674464	187675432	18.54
chr1	187676432	187677314	13.63
chr1	187997337	187998197	20.89
chr1	188457073	188458200	9.38
chr1	188979839	188980654	11.16
chr1	189007011	189008320	36.26
chr1	189342446	189344106	12.5
chr1	189402798	189404293	20.5
chr1	189687447	189688841	90.17
chr1	189726996	189729108	100.07
chr1	189882709	189884317	15.44
chr1	189887316	189888084	9.93
chr1	189920832	189922779	36.9
chr1	189972782	189973554	14.26
chr1	190168565	190169676	16.96
chr1	190169951	190171186	32.87
chr1	190525869	190527084	12.7
chr1	190911131	190912347	36.8
chr1	190927994	190929711	83.06
chr1	190944014	190944932	15.39
chr1	190977827	190979961	108.32
chr1	191025078	191027097	121.85
chr1	191062479	191063709	31.49
chr1	191097620	191099089	19.66
chr1	191125693	191126547	12.54
chr1	191182138	191186346	105.42
chr1	191223734	191225361	50.88
chr1	191267617	191268686	25.54
chr1	191312188	191313250	21.35
chr1	191317297	191318526	31.8
chr1	191325420	191327234	52.34
chr1	191391195	191391952	8.35
chr1	191395856	191398348	156.85
chr1	191461535	191462816	19.25
chr1	191573943	191577507	164.2
chr1	191698006	191698862	13.6
chr1	191717503	191719525	72.78
chr1	191817419	191818609	24.34
chr1	191820535	191822990	117.94
chr1	191834445	191835469	16.53
chr1	191905363	191907995	100.19
chr1	191964051	191965735	22.97
chr1	191989712	191990613	29.34
chr1	192091770	192093650	82.23
chr1	192094352	192095352	10.53
chr1	192136045	192137511	59.03
chr1	192137520	192139075	52.47
chr1	192190263	192191622	18.7
chr1	192598217	192598910	9.63
chr1	192726825	192727661	9.83
chr1	192735803	192737131	16.88
chr1	192744722	192746460	28
chr1	192769976	192771591	22.81
chr1	192795875	192797507	47.57
chr1	192797830	192800206	38.5
chr1	192822392	192823846	21.09
chr1	192833250	192835957	79.05
chr1	192854446	192856878	77.35
chr1	192861376	192862167	9.27
chr1	192947569	192948346	18.11
chr1	193034778	193036844	90
chr1	193129555	193130869	31.05
chr1	193152552	193153832	26.89
chr1	193160101	193160875	13.93
chr1	193172787	193174606	91.25
chr1	193203585	193204399	7.88
chr1	193272104	193273790	22.7
chr1	193329644	193330809	16.57
chr1	193363597	193364486	8.32
chr1	193369228	193370813	38.74
chr1	193376491	193377465	18.39
chr1	193381684	193383616	64
chr1	193385726	193386835	21.91
chr1	193449252	193450337	19.8
chr1	193503740	193504465	9.41
chr1	193575796	193576579	13.07
chr1	193588717	193589619	10.68
chr1	193624991	193626052	20.71
chr1	193698554	193699437	11.96
chr1	194222660	194223578	21.52
chr1	194310351	194311439	10.15
chr1	194354125	194355252	9.28
chr1	194610360	194611189	12.45
chr1	194618593	194621808	99.08
chr1	194677484	194678359	11.63
chr1	194678853	194680930	19.47
chr1	194719913	194720941	13.79
chr1	194816756	194817482	8.95
chr1	194879193	194880288	29.06
chr1	194938504	194939464	12.93
chr1	194961979	194962762	7.88
chr1	194975768	194977345	59.5
chr1	195091637	195093307	40.31
chr1	195130392	195132024	61.17
chr1	195176201	195177176	38.97
chr1	195232414	195233219	11.31
chr1	195240623	195242211	58.96
chr10	3332714	3333433	11.36
chr10	3365963	3366991	15.62
chr10	3739983	3741701	45.96
chr10	3972614	3974351	97.14
chr10	3996101	3996957	12.31
chr10	4107387	4108138	9.78
chr10	4265503	4267406	28.6
chr10	4334100	4334915	20.32
chr10	4338795	4339522	8.19
chr10	4346562	4347515	15.5
chr10	4386111	4389072	174.56
chr10	4431714	4433293	50.28
chr10	4553386	4554195	7.83
chr10	5194184	5195252	26.01
chr10	5289081	5290000	24.41
chr10	5550125	5551129	20.46
chr10	5804402	5806903	193.5
chr10	5823173	5825410	186.79
chr10	5921880	5922925	22.64
chr10	6539862	6540633	9.79
chr10	6788395	6789247	15.59
chr10	7076036	7076778	8.71
chr10	7117713	7118332	9.87
chr10	7182996	7183870	13.02
chr10	7210701	7212825	97.47
chr10	7390208	7394044	92.16
chr10	7589249	7590590	54.61
chr10	7662310	7664031	63.88
chr10	7666990	7668083	27.38
chr10	7680578	7682234	40.64
chr10	7725411	7726814	53.73
chr10	7780090	7781432	35.12
chr10	7792361	7793327	27.41
chr10	7867122	7868060	11.78
chr10	7955080	7957067	84.99
chr10	8196091	8196848	18.35
chr10	8213748	8214639	22.26
chr10	8517660	8519429	69.61
chr10	8761946	8762963	24.2
chr10	8885414	8886993	80.09
chr10	9557259	9558206	12.36
chr10	9674480	9676066	14.61
chr10	9676753	9677445	9.93
chr10	9900197	9902520	83.55
chr10	10321110	10321728	13.42
chr10	10355414	10356311	15.87
chr10	10472002	10472858	17.4
chr10	10557392	10558726	33.56
chr10	11148833	11150240	109.5
chr10	11280236	11282481	126.37
chr10	11342936	11344382	64.1
chr10	11449723	11450468	9.73
chr10	12548132	12549249	15.17
chr10	12552125	12553529	23.08
chr10	12578909	12579715	10.48
chr10	12866672	12869969	124.33
chr10	12922215	12923745	61.14
chr10	12963799	12964938	17.59
chr10	12996892	12997521	9.65
chr10	13007587	13009341	60.03
chr10	13090191	13091303	20.18
chr10	13107720	13108544	10.47
chr10	13192459	13193606	39.31
chr10	13323848	13324677	13.19
chr10	13473800	13474789	10.59
chr10	13500616	13501582	22.71
chr10	13552599	13553671	34.62
chr10	13868415	13869382	16.08
chr10	13964304	13965231	12.78
chr10	13965259	13968648	47.29
chr10	13982733	13983527	8.33
chr10	14544633	14545790	17.04
chr10	14704856	14705956	53
chr10	17074307	17075217	14.88
chr10	17261276	17262282	12.93
chr10	17721701	17724770	122.4
chr10	17727237	17728365	17.26
chr10	17869668	17870484	8.57
chr10	17946916	17948628	46.89
chr10	18021885	18023670	73.02
chr10	18054926	18056638	68.58
chr10	18234422	18235749	68.24
chr10	18318015	18319690	35.51
chr10	18370597	18371369	10.08
chr10	18407170	18408105	27.52
chr10	18545122	18546519	48.22
chr10	18844505	18845636	22.45
chr10	19014691	19016013	53.07
chr10	19104662	19105760	14.57
chr10	19591205	19592586	106.83
chr10	19850181	19851865	21.17
chr10	19907001	19908027	27.32
chr10	19933335	19935251	29.22
chr10	20073081	20073793	9.47
chr10	20148535	20149878	14.71
chr10	20170142	20171164	23.71
chr10	20311329	20313429	143.2
chr10	20347199	20348396	55.94
chr10	20547823	20548699	10
chr10	20724737	20725433	8.37
chr10	20951838	20953240	90.36
chr10	21144691	21145536	12.37
chr10	21160425	21161885	30.28
chr10	21295531	21296799	23.87
chr10	21992827	21993504	6.35
chr10	21993769	21995074	45
chr10	22058163	22059213	36.86
chr10	22140661	22141404	10.74
chr10	22142040	22143314	58.25
chr10	22644673	22645749	37.73
chr10	22730667	22732325	64.5
chr10	23349364	23351110	12.14
chr10	23448975	23449698	7.65
chr10	23711412	23712393	13.91
chr10	23786567	23788070	54.7
chr10	24148883	24149848	23.18
chr10	24595004	24596429	48.35
chr10	24711429	24712438	18.34
chr10	24869443	24870519	50.64
chr10	24926766	24927776	14.19
chr10	24958727	24959555	11.8
chr10	25061411	25062248	17.39
chr10	25199782	25200565	9.34
chr10	25296435	25297501	22.33
chr10	25359075	25360845	58.95
chr10	25381778	25382536	8.76
chr10	26078504	26079414	16.56
chr10	26372687	26376830	73.06
chr10	26694978	26695803	12.18
chr10	26771955	26772901	30.84
chr10	27063515	27064223	8.03
chr10	27140270	27141016	8.05
chr10	27284924	27286068	11.75
chr10	27616432	27617272	11.94
chr10	28074130	28076764	102.6
chr10	28311094	28312009	17.16
chr10	28726679	28727423	6.08
chr10	29143331	29144499	13.13
chr10	29146165	29147843	42.86
chr10	29211273	29212111	10.16
chr10	29312778	29313971	73.71
chr10	29361163	29362698	76.2
chr10	29532674	29533961	20.61
chr10	29534099	29534987	9.93
chr10	29535235	29536422	23.35
chr10	30199925	30201007	44.03
chr10	30327615	30329004	40.61
chr10	30600020	30601296	39.33
chr10	30617704	30619032	81.79
chr10	30655543	30656285	8.98
chr10	30718757	30719505	8.93
chr10	30802380	30804279	82.07
chr10	30810671	30811419	12.54
chr10	30842020	30844938	121.39
chr10	31300021	31300940	14.43
chr10	31312710	31314207	58.8
chr10	31392876	31393778	11.02
chr10	31445078	31446414	54.9
chr10	31608105	31610252	52.89
chr10	32889407	32890450	18.43
chr10	33624040	33624970	13.22
chr10	33904538	33905445	17.83
chr10	33950713	33951710	26.38
chr10	34019035	34020275	94.04
chr10	34033704	34034473	10.69
chr10	34175941	34176862	21.98
chr10	34206202	34208004	68.47
chr10	34280390	34281136	6.96
chr10	34281671	34283121	56.59
chr10	34296968	34298547	47.81
chr10	34316621	34317629	22.93
chr10	34417893	34419114	67.49
chr10	34483203	34484354	10.64
chr10	34512331	34513100	7.42
chr10	36484611	36485567	14.78
chr10	36506158	36507906	29.98
chr10	36973592	36975723	97.1
chr10	37135867	37142261	295.37
chr10	37397022	37398105	23.43
chr10	37636690	37637891	29.59
chr10	38965207	38966383	13.22
chr10	39133418	39134588	48.9
chr10	39170860	39172364	42.05
chr10	39226363	39227232	13.6
chr10	39227255	39228145	13.22
chr10	39369178	39370788	84.44
chr10	39555072	39555813	9.62
chr10	39612752	39613896	19.68
chr10	39638709	39639659	12.12
chr10	39653730	39654565	11
chr10	39659051	39660039	18.1
chr10	39708007	39708711	9.85
chr10	39730768	39733512	134.37
chr10	39898614	39899706	43.33
chr10	39959622	39960762	38.99
chr10	40024568	40025764	29.74
chr10	40141623	40142778	38.7
chr10	40212227	40213180	21.31
chr10	40246408	40247521	23.59
chr10	40256437	40259402	133.84
chr10	40300451	40303196	100.59
chr10	40348165	40350529	171.08
chr10	40637152	40637889	8.81
chr10	40682918	40684084	22.68
chr10	40776970	40777821	11.24
chr10	40882621	40884901	108.07
chr10	41250353	41251087	10.02
chr10	41288517	41289331	12.5
chr10	41302600	41304312	39.29
chr10	41449767	41450973	34.79
chr10	41475858	41477022	15.44
chr10	41477232	41478416	22.52
chr10	41489176	41490952	70.31
chr10	41518252	41520274	99.64
chr10	41809089	41810988	112.23
chr10	41886859	41888044	47.94
chr10	42017816	42018861	16.63
chr10	42030858	42031622	10.19
chr10	42274767	42278925	171.88
chr10	42307927	42308724	10.85
chr10	42477746	42479005	41.56
chr10	42501505	42502891	75.42
chr10	42678442	42679433	26.73
chr10	42760886	42762755	75.32
chr10	42842175	42842999	11.68
chr10	42949827	42950530	7.38
chr10	42957745	42958738	10.17
chr10	43154821	43155625	14.94
chr10	43170933	43171773	11.09
chr10	43172915	43173881	15.21
chr10	43174097	43175651	29.35
chr10	43220880	43222038	48.19
chr10	43452197	43452861	6.6
chr10	43477537	43480758	91.09
chr10	43540209	43541619	55.3
chr10	43577346	43581347	128.68
chr10	43624008	43624869	15.89
chr10	43722439	43723925	37.83
chr10	43901282	43902157	21.19
chr10	44148481	44149343	10.24
chr10	44267792	44269007	59.11
chr10	44357056	44357946	20.44
chr10	44458311	44459134	16.39
chr10	44499438	44500594	15.11
chr10	44529035	44530040	32.43
chr10	44599781	44600603	8.96
chr10	45025124	45025814	9.8
chr10	45066189	45067995	51.42
chr10	45229573	45230662	30.89
chr10	45288990	45290041	18.7
chr10	45335202	45336363	24.16
chr10	45469226	45470738	25.59
chr10	45485408	45487206	70.65
chr10	45577450	45578767	41.99
chr10	45783246	45784667	33.27
chr10	45799910	45800594	6.63
chr10	45806610	45807960	18.2
chr10	45893567	45895072	68.03
chr10	49782656	49783636	12.56
chr10	49788167	49789377	26.35
chr10	50592071	50593409	77.65
chr10	50763310	50764090	12.18
chr10	50891892	50893203	7.43
chr10	50894024	50895565	56.54
chr10	50897519	50898458	10.96
chr10	51553175	51554320	16.43
chr10	51590094	51590897	7.16
chr10	52022143	52022961	13.35
chr10	52027000	52028100	16.8
chr10	52232264	52234586	32.91
chr10	52381260	52382922	87.71
chr10	52416851	52418732	115.08
chr10	52689950	52691877	48.91
chr10	52742448	52743222	10.62
chr10	53091300	53092160	12.86
chr10	53096221	53097100	14.13
chr10	53114953	53115704	7.32
chr10	53378933	53380456	59.84
chr10	53434496	53436366	25.22
chr10	53580506	53581339	8.35
chr10	53595681	53598159	148.54
chr10	53628938	53630601	130.61
chr10	53750230	53751721	17.51
chr10	54058818	54059700	27.07
chr10	54074142	54076377	77.73
chr10	56106482	56107214	10.08
chr10	56114624	56116185	71.73
chr10	56228286	56229605	77
chr10	56338894	56339633	8.13
chr10	56376090	56379620	77.86
chr10	56431495	56432463	18.04
chr10	56838838	56839729	18.45
chr10	56920689	56921983	57.69
chr10	57001158	57001897	10.06
chr10	57437668	57438729	14.01
chr10	57442342	57443510	8.36
chr10	57485693	57487712	107.96
chr10	57531826	57532936	49.39
chr10	57631636	57632475	11.49
chr10	57794358	57795389	16.49
chr10	58223720	58224441	18.84
chr10	58254997	58256068	40.65
chr10	58322493	58324242	178.24
chr10	58382500	58383344	14.6
chr10	58446199	58447557	68.44
chr10	58497291	58498769	85.35
chr10	58652174	58653062	13.23
chr10	58675306	58676125	11.2
chr10	58811933	58814054	26.91
chr10	59114301	59115268	15.13
chr10	59149761	59150651	10.72
chr10	59220807	59223272	102.77
chr10	59292315	59293185	13.76
chr10	59322613	59324853	95.36
chr10	59511077	59512076	20.15
chr10	59615323	59617263	76.08
chr10	59701939	59703204	67.9
chr10	59864870	59865641	9.44
chr10	59878684	59880623	71.25
chr10	59892851	59893533	8.01
chr10	59894620	59895681	10.16
chr10	59898910	59900460	48.92
chr10	59911394	59912159	8.43
chr10	59916187	59917194	20.59
chr10	59919275	59920179	10.42
chr10	59920350	59921606	34.28
chr10	59930800	59931547	8.14
chr10	59950178	59952996	100.19
chr10	59964164	59966137	26.13
chr10	59969472	59970523	15.4
chr10	60002286	60003889	78.58
chr10	60106064	60107294	19.89
chr10	60115282	60116172	11.12
chr10	60191592	60192317	8.74
chr10	60193586	60194428	8.67
chr10	60218405	60219773	21.96
chr10	60244865	60245650	10.92
chr10	60277159	60278413	35.72
chr10	60304950	60305865	13.18
chr10	60346408	60347546	27.3
chr10	60373499	60374453	10.32
chr10	60445011	60445781	10.94
chr10	60589888	60590880	8.08
chr10	60752142	60753372	47.66
chr10	60760190	60761183	18.24
chr10	60779498	60780350	11.79
chr10	60794143	60795036	12.6
chr10	60813397	60815170	23.12
chr10	60826280	60827493	17.55
chr10	60830442	60832132	44.53
chr10	61064374	61065271	14.53
chr10	61068247	61069817	13.26
chr10	61080003	61080919	24.96
chr10	61088953	61089795	10.63
chr10	61145965	61148370	75.4
chr10	61199353	61200135	9.37
chr10	61272845	61273964	14.4
chr10	61275594	61276337	6.75
chr10	61382794	61384170	35.14
chr10	61399192	61400075	12.53
chr10	61451991	61453299	42.76
chr10	61475152	61476745	80.09
chr10	61491821	61492695	13.67
chr10	61648011	61649587	35.16
chr10	61679665	61681167	85.14
chr10	61694744	61696897	63.08
chr10	61714924	61715766	14.74
chr10	61782472	61784551	61.77
chr10	61823070	61824381	15.45
chr10	61826290	61827478	13.1
chr10	61877612	61878384	12.06
chr10	61928403	61929700	16.09
chr10	61943342	61944202	11.76
chr10	61977831	61979587	18.25
chr10	61980151	61980937	8.8
chr10	62110607	62111458	11.56
chr10	62182802	62183734	16.53
chr10	62230609	62231759	33.32
chr10	62260916	62261804	21.31
chr10	62339253	62341353	67.92
chr10	62449096	62450769	56.14
chr10	62486043	62488745	94.8
chr10	62577739	62579030	56.35
chr10	62601778	62602785	25.43
chr10	62650357	62652161	129.03
chr10	62725529	62726572	14.84
chr10	62791041	62793174	91.88
chr10	62864939	62865925	35.93
chr10	62885844	62887870	44.14
chr10	62919987	62921257	42.16
chr10	62946439	62947526	34.89
chr10	62979650	62981116	42.27
chr10	63022621	63025536	138.61
chr10	63099780	63100827	16.07
chr10	63243272	63244759	75.64
chr10	63337986	63339851	65.45
chr10	63377448	63378186	10.48
chr10	63382329	63383234	26.85
chr10	63386243	63387028	15.96
chr10	63428480	63430705	98.79
chr10	63582431	63583078	8.5
chr10	64089901	64090692	11.68
chr10	66814151	66815154	13.61
chr10	67002249	67005384	115.1
chr10	67095758	67097666	70.04
chr10	67126085	67127731	25.78
chr10	67185302	67186294	21.48
chr10	67284229	67286024	69.44
chr10	67311103	67311871	11.2
chr10	67314838	67315610	8.07
chr10	67535250	67536631	25.61
chr10	67537028	67538244	40.05
chr10	67547649	67549962	57.14
chr10	67912172	67913052	14.29
chr10	67978934	67980309	88.65
chr10	68028293	68029170	11.82
chr10	68136232	68137239	19.57
chr10	68276090	68277541	24.51
chr10	68282846	68283698	18.03
chr10	68723407	68724322	9.81
chr10	69044051	69044729	6.22
chr10	69211848	69214101	69.4
chr10	69253082	69254133	22.94
chr10	69278576	69279403	10.37
chr10	69351791	69353589	74.41
chr10	69398347	69399612	15.98
chr10	69533407	69534573	12.21
chr10	69583586	69584745	24.83
chr10	69738668	69739571	20.4
chr10	69781357	69782035	7.81
chr10	69792910	69793605	7.24
chr10	69845556	69846274	9.12
chr10	69925082	69926236	31.65
chr10	70094768	70095699	16.02
chr10	70095976	70098548	41.24
chr10	70244440	70245753	24.66
chr10	70296552	70297452	14.76
chr10	70440072	70441153	15.21
chr10	70519874	70520896	18.62
chr10	70598105	70600286	56.01
chr10	71158775	71160326	29.19
chr10	71218067	71218826	9.2
chr10	71237268	71238786	91.13
chr10	71284278	71285730	45.06
chr10	71344316	71345446	37.26
chr10	71347105	71348829	86.68
chr10	72653992	72655833	74.78
chr10	72867784	72868666	14.95
chr10	73099599	73100481	14.43
chr10	74679944	74681108	12.44
chr10	74760469	74761323	11.02
chr10	74966487	74967980	87.42
chr10	75020872	75021705	10.73
chr10	75036555	75037870	105.85
chr10	75059144	75059904	7.52
chr10	75060035	75061737	28.26
[truncated: 22,796 more rows]
