# Supplementary material for: A spatio-temporally constrained gene regulatory network directed by PBX1/2 acquires limb patterning specificity via HAND2
Source: bioRxiv preprint, doi:10.1101/2022.03.08.483529, version 1 (2022-03-09)
Supplement: Supplementary Table 4 [file 483529_file05.xlsx]

## Sheet: Pbx_mutant
Gene	CPM_mutant_rep1	CPM_mutant_rep2	CPM_mutant_rep3	CPM_wt_rep1	CPM_wt_rep2	CPM_wt_rep3	log2FC	PValue	FDR	UP_regulated	DOWN_regulated
Rspo2	8.29439	9.27615	8.17305	49.6014	49.0964	56.6001	-2.59188	2.54212e-156	2.85252e-152	FALSE	TRUE
Pbx1	85.3614	80.3203	75.5173	301.698	336.038	344.277	-2.02546	1.0216e-145	5.7317e-142	FALSE	TRUE
Col14a1	2.50082	2.44843	2.06411	53.1356	43.9904	80.8004	-4.66323	7.9601e-120	2.97734e-116	FALSE	TRUE
Crmp1	62.2913	67.9986	67.4902	251.439	250.937	214.175	-1.85708	9.61045e-107	2.69597e-103	FALSE	TRUE
Tfap2c	12.3999	13.6953	14.0526	48.3275	48.0054	49.2604	-1.85823	1.46089e-99	3.27854e-96	FALSE	TRUE
Fgf8	1.79226	3.06551	2.14751	29.1157	23.959	24.7875	-3.47059	1.25656e-87	2.34997e-84	FALSE	TRUE
Tshz2	27.1339	29.4806	26.9585	73.3542	75.6739	83.6315	-1.47682	1.82695e-75	2.9286e-72	FALSE	TRUE
Spry4	14.8799	16.0043	15.6581	49.2727	43.6413	52.4479	-1.64289	5.12745e-69	7.19188e-66	FALSE	TRUE
Etv4	42.2014	40.4886	40.3023	106.867	113.489	98.4368	-1.37397	7.97961e-66	9.9488e-63	FALSE	TRUE
Hopx	1.06285	1.13464	0.833984	12.123	9.27377	10.3805	-3.38548	5.84726e-64	6.56121e-61	FALSE	TRUE
Gja3	0.0208402	0.159247	0.0625488	4.23277	6.2407	4.34095	-5.86794	4.68558e-63	4.77972e-60	FALSE	TRUE
Alx1	8.46112	7.4249	6.33828	29.5061	29.5015	37.5167	-2.11839	4.98016e-58	4.65686e-55	FALSE	TRUE
Spry1	28.1551	28.7242	28.7308	73.8679	68.3422	65.2191	-1.27673	6.08274e-57	5.25034e-54	FALSE	TRUE
Kcnk2	35.074	34.0192	35.6528	13.2325	12.0013	11.6807	1.50409	2.50078e-56	2.00437e-53	TRUE	FALSE
Parm1	53.0591	45.8433	48.8506	18.8009	15.3835	17.8461	1.50501	7.79947e-54	5.83453e-51	TRUE	FALSE
Itga4	54.5179	43.375	49.4344	14.9585	16.3655	18.0978	1.57563	6.70123e-52	4.69966e-49	TRUE	FALSE
Col1a2	288.074	265.445	285.702	137.729	122.785	135.765	1.08242	7.88162e-50	5.20233e-47	TRUE	FALSE
Cyp26b1	17.0473	17.1191	18.9523	42.2866	44.0995	48.7361	-1.34697	1.0974e-49	6.84109e-47	FALSE	TRUE
Lrrn3	53.4342	47.2964	68.8663	9.90385	11.4777	15.2667	2.21004	5.29039e-47	3.12439e-44	TRUE	FALSE
Tcf7	102.325	101.321	109.502	217.576	200.139	203.563	-0.988444	4.08825e-44	2.29371e-41	FALSE	TRUE
Dusp6	209.027	207.459	230.159	448.406	406.867	436.612	-0.998464	1.5012e-43	8.02141e-41	FALSE	TRUE
Olfm1	49.0786	48.232	46.8491	114.593	110.347	96.172	-1.15536	1.7387e-43	8.86816e-41	FALSE	TRUE
Tmem30b	13.9838	15.3873	17.9932	2.7328	3.86225	3.43921	2.23934	6.22594e-42	3.03745e-39	TRUE	FALSE
Gfra3	18.0893	17.2186	17.889	5.13685	5.717	5.62017	1.69104	3.16627e-41	1.48036e-38	TRUE	FALSE
Spp1	5.52265	4.61817	5.3792	0.719159	0.785543	0.608153	2.87308	5.13204e-40	2.30347e-37	TRUE	FALSE
Igf1	58.4776	63.898	56.2939	21.4926	27.7777	24.9343	1.26815	2.94388e-38	1.27051e-35	TRUE	FALSE
Lmx1b	26.467	29.5603	26.0203	56.2793	57.8028	55.4048	-1.04626	1.16511e-37	4.84212e-35	FALSE	TRUE
Chst2	45.5358	43.1958	42.283	83.6279	79.078	83.5895	-0.910716	2.39915e-37	9.61461e-35	FALSE	TRUE
Bmf	89.717	83.3062	90.6749	30.2047	41.8956	34.5389	1.30643	8.57707e-37	3.31874e-34	TRUE	FALSE
Popdc2	6.81474	5.81252	5.77534	21.8419	17.6092	20.111	-1.69463	9.30191e-37	3.47922e-34	FALSE	TRUE
Prdm1	13.0668	11.0478	13.719	34.9717	30.6798	41.1656	-1.49778	9.75885e-36	3.44651e-33	FALSE	TRUE
Zic2	6.04365	7.28556	6.98462	21.2666	23.6754	19.1673	-1.65714	9.82874e-36	3.44651e-33	FALSE	TRUE
Tmem173	19.7357	17.8755	20.7245	46.8892	44.5359	40.7462	-1.18016	1.81234e-35	6.16251e-33	FALSE	TRUE
Il17rd	73.6701	75.9609	81.9181	144.387	141.136	165.753	-0.962715	5.19807e-35	1.71551e-32	FALSE	TRUE
Epha3	33.7403	37.3236	38.9262	15.1434	14.7289	17.4057	1.21787	5.80521e-35	1.86115e-32	TRUE	FALSE
Sulf1	144.297	123.516	143.967	55.6629	55.8172	71.07	1.17346	1.75435e-34	5.46821e-32	TRUE	FALSE
Tbx15	20.9027	27.2512	22.6427	54.5123	61.8615	54.1885	-1.26797	3.25535e-34	9.87252e-32	FALSE	TRUE
Ebf2	13.2335	12.4412	12.7808	3.22594	4.14592	3.29241	1.85088	7.3071e-34	2.15771e-31	TRUE	FALSE
Gata5	3.91796	3.20485	3.41934	16.4379	11.5868	14.4069	-2.00914	1.01811e-33	2.92928e-31	FALSE	TRUE
Mafb	23.737	22.5136	25.7493	7.99294	9.27377	10.0869	1.39621	5.77705e-33	1.62061e-30	TRUE	FALSE
Scrn1	1.75058	1.3337	1.50117	8.2806	6.02249	7.80113	-2.26898	2.99026e-30	8.18384e-28	FALSE	TRUE
Stom	23.3202	25.599	24.8736	10.2121	11.0412	9.31102	1.27185	3.5817e-30	9.56911e-28	TRUE	FALSE
Postn	130.897	118.938	111.42	51.7589	40.8919	59.1166	1.25092	4.6069e-30	1.20219e-27	TRUE	FALSE
Nrp2	317.834	286.187	281.24	131.092	121.846	164.495	1.08449	8.07821e-29	2.06013e-26	TRUE	FALSE
Ets2	191.375	185.822	198.176	323.519	312.21	344.047	-0.767982	8.3019e-29	2.07013e-26	FALSE	TRUE
Stk39	57.4772	58.1252	55.5017	96.3468	97.8873	97.7448	-0.770905	8.99854e-29	2.19506e-26	FALSE	TRUE
Ppp2r2b	4.12636	4.61817	3.12744	13.2736	13.0706	15.7071	-1.82305	9.66561e-29	2.30761e-26	FALSE	TRUE
Kcp	24.0704	20.5429	21.0164	42.903	51.0603	44.4371	-1.07632	9.63398e-28	2.25214e-25	FALSE	TRUE
S1pr3	124.708	123.556	123.993	77.4021	71.4626	70.4828	0.762972	1.79745e-27	4.11616e-25	TRUE	FALSE
Hspa2	12.4208	11.9435	15.5747	4.56152	3.70951	3.83765	1.72013	1.91671e-27	4.30147e-25	TRUE	FALSE
Pknox2	83.6525	69.8697	83.5861	36.9237	35.0876	43.9128	1.0321	2.05694e-27	4.52567e-25	TRUE	FALSE
C130021I20Rik	48.0366	65.59	51.1232	158.955	181.133	122.763	-1.49007	4.8938e-27	1.05603e-24	FALSE	TRUE
Six1	41.6179	42.4991	42.6166	11.7531	18.3075	11.3242	1.61518	5.00726e-27	1.06012e-24	TRUE	FALSE
Osbpl6	16.6513	17.358	16.3044	32.0334	31.9672	34.9583	-0.975653	5.48127e-27	1.13899e-24	FALSE	TRUE
Shisa3	7.2107	7.24575	5.14985	19.9926	24.0463	18.622	-1.67523	8.1648e-27	1.66577e-24	FALSE	TRUE
Cdo1	52.5381	52.3525	60.3388	29.1157	31.1817	28.2057	0.900693	1.06858e-25	2.14116e-23	TRUE	FALSE
Krt18	89.5711	102.973	94.7406	55.4574	51.3439	55.7403	0.821617	1.35969e-25	2.67668e-23	TRUE	FALSE
Srms	0.979489	1.45313	1.20928	7.08886	5.52062	5.05396	-2.27416	1.71183e-25	3.31181e-23	FALSE	TRUE
Mapk11	13.171	14.5313	14.3654	34.5196	33.451	27.304	-1.1791	4.6961e-25	8.93135e-23	FALSE	TRUE
Gfra2	3.9388	2.88636	4.16992	0.369853	0.785543	0.377474	2.84278	9.18786e-25	1.71828e-22	TRUE	FALSE
Lef1	118.747	109.423	119.635	198.755	182.224	217.698	-0.783578	1.6623e-24	3.05781e-22	FALSE	TRUE
Mdfi	63.7501	67.4611	65.2176	36.821	40.2154	37.4328	0.779235	1.77786e-24	3.21764e-22	TRUE	FALSE
Krt8	62.458	75.2045	65.6554	37.1908	32.5346	37.5587	0.922171	2.62972e-24	4.68383e-22	TRUE	FALSE
Cxcl14	62.6248	60.713	61.1519	33.4923	27.7122	36.1536	0.921761	3.84799e-24	6.74661e-22	TRUE	FALSE
Etv5	56.2893	54.6616	54.4383	88.2717	91.6685	88.979	-0.701259	1.20959e-23	2.08812e-21	FALSE	TRUE
Npnt	72.8156	72.8158	82.1266	37.9716	43.0303	45.8421	0.844485	2.0495e-23	3.48447e-21	TRUE	FALSE
Cpa2	10.3159	12.6602	9.17383	35.6087	39.8445	25.2069	-1.64587	2.35885e-23	3.95054e-21	FALSE	TRUE
Col1a1	253.854	226.47	232.994	123.983	105.961	143.44	0.93378	2.57529e-23	4.2496e-21	TRUE	FALSE
Serinc2	13.6503	14.392	12.1762	4.89028	5.4988	4.7394	1.41087	2.79081e-23	4.53851e-21	TRUE	FALSE
Fgf10	30.9268	33.2031	31.7957	59.0121	50.9293	57.9423	-0.807498	8.35168e-23	1.33877e-20	FALSE	TRUE
Scn2b	33.1984	34.0391	32.1709	61.0258	55.9481	54.0836	-0.783	2.08682e-22	3.29806e-20	FALSE	TRUE
Amica1	3.70955	3.80203	3.27339	12.3284	13.1142	9.52073	-1.69561	2.21025e-22	3.44461e-20	FALSE	TRUE
Meox2	3.00099	3.30438	2.31431	10.1915	9.38287	8.57705	-1.70572	5.76396e-22	8.85991e-20	FALSE	TRUE
Prdm6	33.7819	29.3612	32.1084	15.842	13.0706	17.217	1.04531	1.66196e-21	2.52011e-19	TRUE	FALSE
Plin2	123.603	137.192	151.848	74.9569	81.4346	82.4152	0.78908	2.25662e-21	3.37621e-19	TRUE	FALSE
Sema5a	49.3287	52.4123	52.7912	90.9223	82.8529	109.048	-0.872011	2.52119e-21	3.72241e-19	FALSE	TRUE
Jun	72.4822	74.4282	72.3064	38.6291	37.9679	47.6246	0.819335	2.70743e-21	3.94547e-19	TRUE	FALSE
Shox2	2.5425	3.18495	2.10581	9.55454	15.3181	9.5417	-2.13276	6.84595e-21	9.84851e-19	FALSE	TRUE
Ifrd1	52.3505	56.7716	53.8337	86.1553	85.3405	98.3739	-0.727701	9.66017e-21	1.37211e-18	FALSE	TRUE
Flrt2	51.3294	49.6652	50.7479	28.0061	25.9884	32.6725	0.807773	2.30012e-20	3.2262e-18	TRUE	FALSE
Mab21l1	7.69003	8.87803	7.67266	22.2528	22.9771	16.6298	-1.35084	4.1784e-20	5.78837e-18	FALSE	TRUE
Col3a1	1000.85	965.158	984.227	674.448	640.392	646.529	0.588956	6.90353e-20	9.4469e-18	TRUE	FALSE
Bcat1	141.88	134.206	140.422	220.802	207.645	255.109	-0.714762	9.43753e-20	1.27589e-17	FALSE	TRUE
Spry2	19.3189	19.2291	17.8473	33.5128	33.3419	32.1901	-0.812324	1.08349e-19	1.44737e-17	FALSE	TRUE
Tril	340.695	319.49	343.664	499.014	492.055	535.761	-0.605019	1.64154e-19	2.16702e-17	FALSE	TRUE
Mfap4	80.7557	80.1014	82.5645	50.5877	54.0279	52.9932	0.627166	2.10402e-19	2.74526e-17	TRUE	FALSE
Lin28b	193.689	183.712	186.25	300.177	277.798	285.916	-0.616083	2.93323e-19	3.78319e-17	FALSE	TRUE
Krt23	0.500164	0.676801	0.562939	3.53415	2.70576	2.28581	-2.28631	3.15289e-19	4.0203e-17	FALSE	TRUE
Mn1	24.7581	25.5194	19.411	10.1093	11.0849	8.72384	1.22015	4.49938e-19	5.67276e-17	TRUE	FALSE
Gata2	20.4442	19.1893	20.516	10.3559	10.2339	10.3176	0.96026	5.4406e-19	6.78322e-17	TRUE	FALSE
Bcl9l	102.054	100.425	101.704	63.4298	62.4725	70.0843	0.634108	6.83379e-19	8.42659e-17	TRUE	FALSE
Tnni1	2.79258	3.26457	2.79385	9.43126	7.81178	7.80113	-1.49936	8.39302e-19	1.02367e-16	FALSE	TRUE
Acot11	3.23023	4.27977	3.02319	10.0888	10.0157	9.56267	-1.49195	1.19793e-18	1.44538e-16	FALSE	TRUE
Dync1i1	1.29209	1.19435	1.56372	5.79437	4.40777	4.34095	-1.84393	2.21154e-18	2.63997e-16	FALSE	TRUE
Edn3	21.4237	22.0757	23.5601	12.0613	12.0886	11.471	0.912572	2.60887e-18	3.08149e-16	TRUE	FALSE
Ldb2	42.8683	45.7836	42.6791	26.1979	26.4466	27.7863	0.70743	3.41769e-18	3.99478e-16	TRUE	FALSE
Lhx2	52.4756	74.1296	58.4623	154.763	158.2	112.173	-1.19971	4.3749e-18	5.06091e-16	FALSE	TRUE
Stambpl1	4.4598	4.49874	4.52437	10.4792	11.5213	10.3176	-1.26049	4.94065e-18	5.65704e-16	FALSE	TRUE
Atp1a2	4.20972	3.40391	4.14907	1.23284	0.960108	1.15339	1.80878	9.01103e-18	1.02134e-15	TRUE	FALSE
Cyp27a1	7.29407	7.4249	6.98462	14.8352	17.6965	14.9102	-1.12749	1.09247e-17	1.22586e-15	FALSE	TRUE
Trp53inp1	18.652	19.0898	20.8705	7.80801	10.4521	8.05278	1.15598	1.49654e-17	1.66264e-15	TRUE	FALSE
Erg	25.1749	24.3648	27.167	43.2728	39.6044	42.8643	-0.713278	2.60863e-17	2.86975e-15	FALSE	TRUE
Etv2	2.35494	2.94607	1.79307	7.23269	8.27002	6.9623	-1.66006	2.87328e-17	3.1302e-15	FALSE	TRUE
Cth	21.5696	21.0605	24.5817	38.7935	36.1131	38.6072	-0.756331	4.07353e-17	4.3951e-15	FALSE	TRUE
Aldh1a2	86.8827	82.1318	68.8871	131.072	184.559	151.073	-0.972025	6.14539e-17	6.56738e-15	FALSE	TRUE
Rgs9	19.2563	16.4224	18.2851	8.36279	9.07738	9.49976	1.002	7.50953e-17	7.94948e-15	TRUE	FALSE
Ildr2	19.8399	16.8205	18.577	9.51345	9.36105	9.08035	0.982098	8.1754e-17	8.57348e-15	TRUE	FALSE
Psat1	257.522	254.577	260.933	372.977	386.64	461.546	-0.659656	9.78854e-17	1.01701e-14	FALSE	TRUE
Nptx2	3.18855	2.44843	2.75215	7.80801	7.28809	7.10909	-1.40449	1.09944e-16	1.13182e-14	FALSE	TRUE
Notum	9.00296	8.53963	9.23638	17.9379	16.0382	19.5657	-0.999792	1.41574e-16	1.44418e-14	FALSE	TRUE
Asns	56.1226	77.5932	82.898	160.948	142.903	232.042	-1.30678	1.84071e-16	1.84416e-14	FALSE	TRUE
Wfikkn1	25.0499	21.9562	29.94	11.9791	13.6379	12.0163	1.03176	1.83473e-16	1.84416e-14	TRUE	FALSE
Chst15	21.4029	22.0956	23.289	41.1359	34.6293	37.328	-0.760051	1.98842e-16	1.97452e-14	FALSE	TRUE
Cd248	78.2549	74.5675	74.9543	49.5398	52.5441	47.3101	0.608563	2.45853e-16	2.41993e-14	TRUE	FALSE
Lin28a	396.818	386.732	385.071	605.368	556.251	554.866	-0.554661	3.22106e-16	3.14292e-14	FALSE	TRUE
Itga1	6.25206	6.0713	6.42168	14.5887	12.4159	18.7269	-1.2867	3.30723e-16	3.19918e-14	FALSE	TRUE
Kitl	85.153	82.1517	92.9476	55.9095	54.2897	59.536	0.616472	3.38094e-16	3.24253e-14	TRUE	FALSE
Sncaip	42.6807	43.2953	39.927	22.2734	27.3631	23.3824	0.786368	3.61342e-16	3.43611e-14	TRUE	FALSE
Tbx18	11.7539	10.9482	11.5715	21.7186	24.941	19.9222	-0.957769	4.3819e-16	4.13187e-14	FALSE	TRUE
Pbx3	120.415	111.035	112.838	77.7514	79.4053	76.795	0.557382	5.97166e-16	5.584e-14	TRUE	FALSE
Mycn	184.415	174.834	190.836	276.198	258.793	308.9	-0.617447	6.43844e-16	5.97072e-14	FALSE	TRUE
Ssbp3	352.72	355.738	359.572	518.062	532.554	496.651	-0.534758	6.64294e-16	6.10987e-14	FALSE	TRUE
Gpr153	13.4002	15.0091	14.4488	6.26696	7.37537	5.64114	1.15265	6.97833e-16	6.36617e-14	TRUE	FALSE
Bmp7	61.8537	62.6439	63.6956	104.401	104.324	89.0629	-0.662034	7.85137e-16	7.10485e-14	FALSE	TRUE
Tfap2b	23.9454	20.0054	23.018	11.3216	9.86292	12.8341	0.976373	9.82572e-16	8.82035e-14	TRUE	FALSE
Socs2	5.73105	6.33008	6.31743	12.6777	12.9178	12.3728	-1.04621	9.91e-16	8.82541e-14	FALSE	TRUE
Ano1	2.1257	3.44372	2.79385	7.27378	8.37912	8.30443	-1.51587	1.10771e-15	9.78706e-14	FALSE	TRUE
Cpm	27.5924	33.6808	36.737	17.0543	18.5694	16.3362	0.915669	1.44934e-15	1.27055e-13	TRUE	FALSE
Pth1r	103.951	104.128	101.955	70.5392	70.3061	72.7476	0.537539	1.5283e-15	1.32938e-13	TRUE	FALSE
Rspo1	38.2001	39.0355	34.1308	18.3694	20.5332	13.1906	1.09634	2.09859e-15	1.81141e-13	TRUE	FALSE
Pag1	32.3856	30.8343	26.4999	46.7043	47.6563	51.9656	-0.705562	4.51092e-15	3.8639e-13	FALSE	TRUE
Lum	3.52199	6.86754	6.25488	1.66434	1.24378	1.06951	2.06229	6.93248e-15	5.89313e-13	TRUE	FALSE
Slc38a4	231.159	230.252	223.007	333.443	312.253	352.267	-0.54412	8.15667e-15	6.88165e-13	FALSE	TRUE
Sfrp1	381.521	348.99	354.839	254.459	234.223	257.29	0.540918	8.69861e-15	7.28411e-13	TRUE	FALSE
Fam212a	24.4247	29.3015	26.2914	43.6427	45.9979	41.9416	-0.717176	9.32833e-15	7.75357e-13	FALSE	TRUE
F2r	176.766	177.979	184.373	256.534	251.395	259.115	-0.50872	1.12724e-14	9.30054e-13	FALSE	TRUE
Vcam1	34.9698	35.7112	33.8389	22.5405	22.1261	21.5789	0.657856	1.4297e-14	1.171e-12	TRUE	FALSE
Sh3bp5	99.3452	100.664	104.811	65.9777	72.7282	68.9519	0.553838	1.61744e-14	1.31517e-12	TRUE	FALSE
Hdac9	10.5035	11.625	11.3839	20.6501	20.5332	19.1673	-0.848331	1.98905e-14	1.60569e-12	FALSE	TRUE
Fbln5	26.467	25.1213	24.1647	11.5065	11.674	15.9378	0.953186	2.40819e-14	1.93016e-12	TRUE	FALSE
Slc1a5	65.0422	58.0854	59.2129	87.0594	90.2938	105.315	-0.632521	3.8761e-14	3.08466e-12	FALSE	TRUE
Gpx3	65.459	70.2878	79.6872	47.6905	46.2816	42.5287	0.658269	5.70699e-14	4.50973e-12	TRUE	FALSE
Ssbp2	66.5219	64.0771	66.5937	44.6906	46.4998	44.9194	0.534839	6.94388e-14	5.44876e-12	TRUE	FALSE
Clmn	76.3168	64.8335	72.223	39.9236	38.2734	50.0992	0.733687	8.21654e-14	6.40262e-12	TRUE	FALSE
Skap2	45.0148	44.6888	47.3078	28.7869	30.1779	32.0433	0.590196	8.81489e-14	6.82151e-12	TRUE	FALSE
Slc20a1	98.5116	97.6385	96.9924	139.846	134.633	136.813	-0.488579	9.65481e-14	7.42032e-12	FALSE	TRUE
Pkdcc	84.3611	100.923	78.3528	184.803	180.915	132.619	-0.918473	1.15251e-13	8.7975e-12	FALSE	TRUE
Trabd2b	7.02314	6.7282	7.08887	13.7668	12.6341	17.5106	-1.07528	1.47205e-13	1.11608e-11	FALSE	TRUE
Gsta4	55.9767	53.8057	56.8152	33.8827	39.4517	31.8546	0.663579	1.5656e-13	1.17904e-11	TRUE	FALSE
Angpt1	15.6927	21.1401	19.4735	9.57509	9.16466	9.83529	0.978465	1.76751e-13	1.32221e-11	TRUE	FALSE
Fam198b	29.9473	26.2957	28.147	46.581	41.7647	43.0949	-0.639545	1.83356e-13	1.36254e-11	FALSE	TRUE
Mylk	20.1733	20.7021	19.2859	11.3216	10.2339	12.3098	0.828608	1.89525e-13	1.39912e-11	TRUE	FALSE
Rin2	27.5924	30.2371	28.7725	17.8351	18.1111	18.1607	0.678667	2.04213e-13	1.4977e-11	TRUE	FALSE
Kcnh5	0.604365	0.398118	1.00078	3.36977	2.07296	3.31338	-2.12854	2.10246e-13	1.53193e-11	FALSE	TRUE
Lbh	52.4756	54.4427	48.8506	76.6007	76.6559	73.7333	-0.543082	2.23203e-13	1.61584e-11	FALSE	TRUE
Wisp1	18.8812	18.3134	18.1809	11.0134	9.29559	10.5273	0.843916	2.42681e-13	1.74559e-11	TRUE	FALSE
Lhfpl2	147.215	135.022	139.088	97.3536	101.99	99.2757	0.496622	3.80425e-13	2.71894e-11	TRUE	FALSE
Ppap2b	96.5109	92.8212	94.6781	61.9299	67.6221	68.4067	0.520792	4.01036e-13	2.84811e-11	TRUE	FALSE
Eepd1	20.4651	20.8415	20.1407	11.938	12.5905	12.2889	0.739058	5.05568e-13	3.56791e-11	TRUE	FALSE
Lrp8	19.6523	17.4575	22.0172	35.5265	36.135	30.4286	-0.788117	5.84464e-13	4.09892e-11	FALSE	TRUE
Nr4a2	24.8832	18.8708	15.804	8.60936	9.51379	9.24811	1.12152	6.58203e-13	4.58739e-11	TRUE	FALSE
Emb	36.9497	36.4278	40.6984	57.0396	55.1625	55.1741	-0.553225	7.26041e-13	5.02896e-11	FALSE	TRUE
Egr1	3.31359	3.88165	2.83555	11.1778	9.71018	28.3735	-2.29491	8.22018e-13	5.65881e-11	FALSE	TRUE
Gprc5c	85.8199	86.7898	88.2772	60.5738	62.3852	62.0945	0.4955	8.91298e-13	6.09833e-11	TRUE	FALSE
Igfbp5	840.13	779.535	831.816	541.712	457.644	601.442	0.614834	1.10131e-12	7.48961e-11	TRUE	FALSE
Thbs1	34.1571	35.552	34.1308	61.8271	48.2018	72.7057	-0.815462	1.22574e-12	8.28553e-11	FALSE	TRUE
Ifitm1	37.7207	33.5016	45.9525	22.5611	19.5949	23.9486	0.825362	1.28665e-12	8.64522e-11	TRUE	FALSE
Hoxa1	21.8614	18.5921	20.245	11.1367	10.9321	12.6244	0.806535	1.60709e-12	1.071e-10	TRUE	FALSE
Sesn1	42.9516	44.0319	45.7023	30.9238	30.0252	27.5346	0.584461	1.61305e-12	1.071e-10	TRUE	FALSE
Crlf1	5.10585	5.53384	5.3792	9.90385	15.8418	12.0582	-1.23765	1.62959e-12	1.07562e-10	FALSE	TRUE
Myof	8.08599	11.7843	8.90278	2.97937	4.18956	4.02639	1.36252	1.83844e-12	1.20638e-10	TRUE	FALSE
Sema3c	37.1997	33.4021	36.883	22.746	21.1878	25.0181	0.640052	2.01467e-12	1.31434e-10	TRUE	FALSE
Galnt4	18.2143	17.8755	20.3701	30.2458	28.4759	30.1769	-0.655162	2.5666e-12	1.66473e-10	FALSE	TRUE
Ablim1	70.4815	64.7539	66.8021	47.0125	46.9362	48.9877	0.499138	3.25063e-12	2.09628e-10	TRUE	FALSE
Emp2	11.6288	11.2667	12.5932	6.30805	5.30241	6.54288	0.966013	3.30146e-12	2.1169e-10	TRUE	FALSE
Klf6	44.1604	45.485	47.5788	28.191	28.825	33.6581	0.597686	4.08309e-12	2.6032e-10	TRUE	FALSE
Cald1	318.667	321.819	330.404	232.432	229.793	243.219	0.460759	4.18911e-12	2.65571e-10	TRUE	FALSE
Rassf1	32.3023	34.5168	35.069	47.8138	48.2018	56.1388	-0.578505	4.94655e-12	3.11827e-10	FALSE	TRUE
Sesn3	32.0522	32.4466	35.5694	20.4858	21.9079	22.6694	0.621065	5.22338e-12	3.27439e-10	TRUE	FALSE
Nsg1	28.3427	29.2816	27.0419	44.2797	44.9287	39.6557	-0.605787	6.18307e-12	3.85446e-10	FALSE	TRUE
Acta2	35.595	49.0283	44.9518	26.7938	24.1773	25.144	0.767501	6.75669e-12	4.16576e-10	TRUE	FALSE
Sp6	47.4323	42.5588	45.4938	79.8267	60.0504	84.5122	-0.728067	6.75075e-12	4.16576e-10	FALSE	TRUE
Slc27a6	3.39695	3.384	3.56528	9.55454	7.48448	6.89939	-1.21011	6.85749e-12	4.20481e-10	FALSE	TRUE
Tmem132c	282.551	271.238	297.524	199.741	193.462	215.118	0.48481	7.39693e-12	4.51092e-10	TRUE	FALSE
Abca5	14.734	13.118	14.7615	7.68473	6.61165	8.3254	0.912636	8.39721e-12	5.09325e-10	TRUE	FALSE
Msx1	52.3089	54.5024	50.2684	73.6214	73.0555	91.5794	-0.600971	1.08797e-11	6.56348e-10	FALSE	TRUE
Mfsd2a	5.37677	5.93196	5.73364	14.2188	14.227	9.64656	-1.15975	1.12701e-11	6.76269e-10	FALSE	TRUE
Sobp	19.1938	18.7315	20.2867	11.2394	12.285	11.0726	0.750738	1.1986e-11	7.15398e-10	TRUE	FALSE
Gli1	64.8338	63.8582	71.7644	30.3485	45.0814	40.4946	0.790324	1.26406e-11	7.50478e-10	TRUE	FALSE
Kif26a	126.375	136.017	135.085	90.6552	79.0125	99.8419	0.560425	1.58987e-11	9.38946e-10	TRUE	FALSE
Masp1	9.58649	8.67898	8.88193	15.9448	14.8817	16.6718	-0.807235	1.77321e-11	1.04174e-09	FALSE	TRUE
Snx25	14.1713	13.7948	13.5314	21.1022	21.6897	24.8504	-0.704819	1.91292e-11	1.11796e-09	FALSE	TRUE
Pik3r1	55.289	50.4018	55.1055	36.636	34.8912	39.8235	0.529851	2.1809e-11	1.26797e-09	TRUE	FALSE
Mthfd2	108.306	117.007	107.438	166.598	156.912	225.834	-0.723253	2.43919e-11	1.41083e-09	FALSE	TRUE
Disp1	47.4531	48.5704	46.1193	63.0394	66.0947	72.475	-0.504116	2.53921e-11	1.46115e-09	FALSE	TRUE
Dusp4	25.3625	23.8473	24.1438	36.3278	34.2366	37.2022	-0.555131	2.77977e-11	1.59142e-09	FALSE	TRUE
Atg9a	25.2583	23.907	24.54	35.8347	38.8189	35.1261	-0.574658	2.9022e-11	1.65308e-09	FALSE	TRUE
Nr2f1	81.5893	78.5487	62.8616	36.1429	47.9181	29.7156	0.971015	2.95495e-11	1.67462e-09	TRUE	FALSE
Gulp1	38.8878	39.1748	42.1996	24.9035	28.2577	27.6814	0.573138	3.48723e-11	1.96634e-09	TRUE	FALSE
Slc40a1	20.0899	19.3286	19.5152	8.2806	11.5649	11.7017	0.90197	3.54558e-11	1.98925e-09	TRUE	FALSE
Alx3	136.399	133.409	115.861	200.933	187.112	176.113	-0.548713	3.68855e-11	2.04897e-09	FALSE	TRUE
Hand1	49.0161	49.8245	40.9903	31.2526	22.3661	28.2476	0.771972	3.67126e-11	2.04897e-09	TRUE	FALSE
Olfml1	11.608	12.4611	12.4055	5.01357	7.11352	6.20735	0.993084	4.5227e-11	2.49996e-09	TRUE	FALSE
Rspo4	7.60667	10.2714	8.25645	19.294	23.0208	14.7634	-1.1261	4.56556e-11	2.51128e-09	FALSE	TRUE
Emp1	23.4035	25.9374	26.9794	47.0125	34.6075	46.2825	-0.745064	4.77313e-11	2.61265e-09	FALSE	TRUE
Cygb	14.088	14.2725	16.1167	27.6979	25.0064	22.2081	-0.752249	5.08547e-11	2.7701e-09	FALSE	TRUE
Nfatc4	180.205	165.458	183.935	124.538	132.386	127.104	0.463678	5.17296e-11	2.80414e-09	TRUE	FALSE
Prrx1	547.659	521.216	570.195	381.997	413.13	408.867	0.445052	5.80981e-11	3.13422e-09	TRUE	FALSE
Dkk1	6.46046	6.31017	10.0704	16.7667	16.4528	15.7281	-1.09985	7.65729e-11	4.11112e-09	FALSE	TRUE
Pknox1	81.2559	82.4901	82.8563	62.0943	58.7848	58.8021	0.456667	9.67528e-11	5.16982e-09	TRUE	FALSE
Zic5	0.916968	1.31379	1.50117	3.28758	3.44766	3.18756	-1.40825	9.93986e-11	5.28603e-09	FALSE	TRUE
Myc	125.062	120.729	122.742	172.742	155.668	189.702	-0.491533	1.01395e-10	5.34157e-09	FALSE	TRUE
Nuak1	41.5137	42.738	47.141	29.917	28.2577	31.9175	0.544169	1.01276e-10	5.34157e-09	TRUE	FALSE
Rgs5	2.06318	1.51285	1.87646	4.47933	6.06613	3.94251	-1.40889	1.1716e-10	6.14321e-09	FALSE	TRUE
Cdh11	194.105	192.49	208.162	143.688	149.188	146.103	0.438148	1.20959e-10	6.31292e-09	TRUE	FALSE
Fgfr2	180.914	155.903	172.385	113.237	109.649	131.403	0.52322	1.25727e-10	6.53143e-09	TRUE	FALSE
Sall3	20.9652	19.4083	23.2682	34.4169	29.8288	38.9637	-0.697866	1.32259e-10	6.83908e-09	FALSE	TRUE
Apcdd1	120.956	117.226	141.965	191.543	167.757	208.995	-0.580161	1.44781e-10	7.45224e-09	FALSE	TRUE
Wnt2	35.6367	36.5273	32.7339	57.7177	46.0197	54.4821	-0.593034	1.52923e-10	7.83539e-09	FALSE	TRUE
Galnt16	19.7982	18.9703	19.1191	28.9307	27.7777	28.9816	-0.565966	1.63892e-10	8.35922e-09	FALSE	TRUE
Ednra	74.7537	77.8918	76.7474	49.2316	53.2423	59.6828	0.500486	2.03722e-10	1.03222e-08	TRUE	FALSE
Greb1	153.384	134.444	168.778	85.6827	77.245	111.963	0.73198	2.04218e-10	1.03222e-08	TRUE	FALSE
Hhip	6.75222	7.72349	8.48579	2.7328	3.64404	4.00542	1.14527	2.24033e-10	1.12227e-08	TRUE	FALSE
Mtcl1	60.3949	54.9403	63.4037	42.8413	39.1898	43.3676	0.51102	2.2361e-10	1.12227e-08	TRUE	FALSE
Hgf	32.99	35.4723	33.547	22.7049	23.6099	23.7809	0.541446	2.49985e-10	1.2467e-08	TRUE	FALSE
Rxfp3	1.47965	0.955484	1.02163	3.30813	4.88782	2.7262	-1.65773	2.58391e-10	1.28292e-08	FALSE	TRUE
Col2a1	185.978	166.055	157.602	127.476	115.453	118.401	0.496072	2.80228e-10	1.38521e-08	TRUE	FALSE
Rasl10b	10.4409	10.4705	10.675	5.81492	6.00067	5.15881	0.895838	3.02845e-10	1.49045e-08	TRUE	FALSE
Slc44a1	39.1587	39.6924	42.3664	26.6705	26.5121	30.3028	0.537849	3.06675e-10	1.50271e-08	TRUE	FALSE
Plxnc1	7.23154	6.42961	7.48501	2.87664	3.12035	3.96348	1.08526	3.18351e-10	1.55314e-08	TRUE	FALSE
Rrp9	80.6307	82.5697	80.8548	111.223	109.911	106.49	-0.424797	3.43056e-10	1.66642e-08	FALSE	TRUE
Tmem229a	1.33377	1.39341	1.33437	4.00674	2.61848	4.21513	-1.41551	3.51629e-10	1.7007e-08	FALSE	TRUE
Gldc	28.0092	27.8484	32.2543	43.8893	53.4387	41.8577	-0.659454	3.75627e-10	1.80897e-08	FALSE	TRUE
Mrpl37	87.8205	87.0485	88.7985	125.216	126.363	112.278	-0.464629	3.80003e-10	1.82223e-08	FALSE	TRUE
Itpk1	61.8745	57.2295	64.0917	44.1975	44.2741	43.9967	0.467602	3.83211e-10	1.82979e-08	TRUE	FALSE
Zbtb16	26.9255	27.3109	29.3979	37.9922	39.6917	42.7175	-0.525675	4.0717e-10	1.93595e-08	FALSE	TRUE
Kremen1	50.4333	53.726	53.7086	79.3746	68.5822	72.8944	-0.484436	4.1786e-10	1.9784e-08	FALSE	TRUE
Loxl1	10.4618	10.9283	9.00703	5.23959	5.30241	3.69086	1.0947	5.93068e-10	2.79614e-08	TRUE	FALSE
Kalrn	38.9711	39.0554	39.6143	25.7254	26.8394	29.5688	0.518325	6.45317e-10	3.02975e-08	TRUE	FALSE
Grb14	10.9619	10.0724	11.5298	4.78755	6.43709	5.82988	0.933504	6.55454e-10	3.06452e-08	TRUE	FALSE
Edar	5.50181	5.21535	5.27495	11.5887	8.55369	12.184	-1.01559	6.61151e-10	3.07833e-08	FALSE	TRUE
Mertk	19.5481	17.6764	20.1407	10.1504	9.99385	13.0438	0.789043	6.79236e-10	3.14946e-08	TRUE	FALSE
Slc19a1	32.7608	35.4922	35.6737	49.6631	46.4125	48.778	-0.479032	7.09125e-10	3.27452e-08	FALSE	TRUE
Foxp4	277.508	270.641	264.561	179.05	213.82	180.642	0.502975	7.13988e-10	3.28347e-08	TRUE	FALSE
Sepp1	52.6006	56.3138	51.2066	40.2935	36.0695	37.349	0.493672	7.30131e-10	3.344e-08	TRUE	FALSE
Ccdc3	2.79258	3.28447	2.91895	6.20532	5.69518	6.37512	-1.02153	8.2741e-10	3.77413e-08	FALSE	TRUE
Tmem59l	8.94044	9.73399	11.0711	17.4037	19.093	15.5813	-0.807712	8.56037e-10	3.88891e-08	FALSE	TRUE
Jph2	6.6897	6.48933	6.75527	3.18485	3.73133	2.93591	1.01696	1.02283e-09	4.6279e-08	TRUE	FALSE
Ube2ql1	1.31293	1.21426	0.979932	2.63007	3.03307	2.93591	-1.29106	1.02811e-09	4.63309e-08	FALSE	TRUE
Hs3st3b1	22.6741	24.3847	26.062	33.6156	35.3276	37.8313	-0.546122	1.0471e-09	4.69982e-08	FALSE	TRUE
Foxf2	16.2762	20.1647	22.7469	6.30805	11.7177	7.21395	1.23022	1.17352e-09	5.24623e-08	TRUE	FALSE
Cd97	10.7119	11.8042	10.3831	17.1365	20.2059	17.5525	-0.737902	1.25014e-09	5.5666e-08	FALSE	TRUE
Lmcd1	2.04234	2.26927	2.33516	4.39714	5.47698	4.57163	-1.11812	1.2921e-09	5.73071e-08	FALSE	TRUE
Chrna6	7.06482	5.33478	7.63096	2.7328	2.68394	3.54406	1.15896	1.38325e-09	6.11083e-08	TRUE	FALSE
Il31ra	1.27125	1.3536	0.875684	2.54788	3.03307	4.13124	-1.4687	1.55416e-09	6.83892e-08	FALSE	TRUE
Adamts18	18.4436	17.3978	18.8897	31.9512	24.9846	28.5203	-0.643213	1.94721e-09	8.53502e-08	FALSE	TRUE
Dcbld1	35.9493	35.3728	38.3841	52.7041	47.2853	51.9027	-0.469624	2.07777e-09	9.07185e-08	FALSE	TRUE
Aplnr	174.995	162.532	167.839	130.64	126.691	119.114	0.424846	2.10117e-09	9.13846e-08	TRUE	FALSE
Ppan	96.6985	95.9664	95.2202	135.531	133.193	120.98	-0.436873	2.16574e-09	9.3829e-08	FALSE	TRUE
Ptpru	54.8305	52.8701	55.0221	40.4373	36.7241	41.4802	0.455528	2.23874e-09	9.6619e-08	TRUE	FALSE
Slc25a33	15.6718	17.4575	17.889	26.8966	26.0538	24.5568	-0.603176	2.27524e-09	9.78178e-08	FALSE	TRUE
Agap2	3.25107	2.78683	3.41934	1.35613	1.41834	1.25825	1.22785	2.36153e-09	1.0114e-07	TRUE	FALSE
Col15a1	57.4356	52.8701	51.853	41.1154	36.2659	38.9847	0.478459	2.57286e-09	1.09722e-07	TRUE	FALSE
Dab2	84.9238	82.6891	76.9768	57.4711	59.7885	62.8704	0.441359	2.58147e-09	1.09722e-07	TRUE	FALSE
Ngfr	77.6714	72.557	83.044	117.963	114.82	99.003	-0.508293	2.60406e-09	1.10265e-07	FALSE	TRUE
Scarf2	47.7449	46.0225	38.7594	64.1285	66.5966	60.8153	-0.531216	2.86872e-09	1.21015e-07	FALSE	TRUE
Srcin1	6.60634	6.48933	6.81782	3.53415	3.6004	3.27144	0.935892	3.15364e-09	1.32535e-07	TRUE	FALSE
Tgfb3	15.6718	14.3323	14.6781	8.2806	9.81928	8.01084	0.775338	3.19601e-09	1.33815e-07	TRUE	FALSE
Cntfr	54.4971	49.4662	54.0213	34.2525	40.4773	36.9715	0.500272	3.36342e-09	1.40301e-07	TRUE	FALSE
0610040J01Rik	10.6077	10.4705	11.9051	5.13685	5.43334	7.06715	0.902632	3.52265e-09	1.46399e-07	TRUE	FALSE
Irf5	1.31293	1.99059	1.60542	4.19167	3.84043	3.50212	-1.22957	3.65844e-09	1.51481e-07	FALSE	TRUE
Mapre2	123.249	121.048	127.287	165.53	157.589	162.041	-0.384824	3.79814e-09	1.56687e-07	FALSE	TRUE
Srm	203.838	219.303	208.267	307.985	284.497	268.782	-0.447874	3.90704e-09	1.60589e-07	FALSE	TRUE
Sst	0.604365	0.816142	0.604639	1.54106	3.4913	1.95028	-1.77782	4.10746e-09	1.68211e-07	FALSE	TRUE
Bcl11b	12.775	11.0876	11.1754	6.88338	6.19706	7.13006	0.793027	4.25801e-09	1.73742e-07	TRUE	FALSE
Mycl	87.8205	82.4702	92.0719	63.4709	66.6838	64.611	0.429791	4.30365e-09	1.74968e-07	TRUE	FALSE
Pid1	2.37578	3.384	2.62705	1.35613	0.851004	0.943685	1.40843	4.40294e-09	1.78359e-07	TRUE	FALSE
1110032F04Rik	4.16804	4.89685	4.89966	8.60936	7.94271	10.024	-0.927958	4.60429e-09	1.85844e-07	FALSE	TRUE
Mybpc1	6.85642	5.7329	3.50273	11.7942	11.1067	13.4842	-1.17649	4.72175e-09	1.89902e-07	FALSE	TRUE
Rnf157	48.9536	53.2483	63.4871	31.006	39.9972	35.0631	0.64369	4.90226e-09	1.96458e-07	TRUE	FALSE
Snai1	81.2559	79.4047	85.7961	108.388	104.368	126.412	-0.460738	5.21111e-09	2.08092e-07	FALSE	TRUE
Ssbp4	44.994	48.6102	44.1595	65.2791	66.8584	59.2215	-0.473893	5.48801e-09	2.18372e-07	FALSE	TRUE
Eif2b3	54.9764	59.021	54.063	72.2241	77.5942	76.082	-0.426505	5.78174e-09	2.29247e-07	FALSE	TRUE
Speg	77.5463	75.2045	74.5582	52.7863	60.0504	55.2999	0.435173	6.01718e-09	2.37742e-07	TRUE	FALSE
Maff	7.66919	8.28086	7.27651	12.575	12.5469	16.5669	-0.843509	6.13752e-09	2.41646e-07	FALSE	TRUE
Wnt4	31.0102	30.1375	31.191	22.4583	18.1329	21.5789	0.570147	6.35348e-09	2.49274e-07	TRUE	FALSE
Iffo2	36.7412	36.9255	37.3625	49.4987	47.6344	53.2867	-0.438124	6.52338e-09	2.55048e-07	FALSE	TRUE
Trim2	58.6234	53.3279	59.1086	41.0126	38.3607	44.3742	0.466826	6.6288e-09	2.5827e-07	TRUE	FALSE
Axl	40.7634	38.4582	39.4683	29.4444	28.6287	27.6605	0.469121	7.59554e-09	2.94912e-07	TRUE	FALSE
Rnd2	12.7125	12.481	12.0928	7.76692	7.28809	7.50754	0.724319	8.11369e-09	3.13944e-07	TRUE	FALSE
Rubie	3.35527	3.24466	4.33672	0.945181	1.92022	1.13242	1.45332	8.87136e-09	3.42081e-07	TRUE	FALSE
Pfn2	59.6655	65.1321	61.694	44.9783	48.0054	44.2483	0.442674	8.96575e-09	3.44537e-07	TRUE	FALSE
Leprel1	11.8581	9.99277	12.4681	19.4584	16.6491	23.1098	-0.787478	9.11429e-09	3.49049e-07	FALSE	TRUE
Itgb5	226.158	219.702	240.187	180.201	169.655	169.465	0.401626	9.65415e-09	3.68467e-07	TRUE	FALSE
Adamts15	15.3592	14.6109	15.1785	8.38334	10.1684	8.66093	0.730749	1.01028e-08	3.84283e-07	TRUE	FALSE
En1	3.50115	2.42852	3.04404	7.58199	5.36787	6.459	-1.1139	1.06289e-08	4.01573e-07	FALSE	TRUE
Junb	7.43995	7.12631	5.75449	11.1161	12.5469	18.0558	-1.03731	1.05947e-08	4.01573e-07	FALSE	TRUE
Pim1	40.7217	45.9428	41.8869	56.0328	58.5011	61.2556	-0.45128	1.07561e-08	4.05014e-07	FALSE	TRUE
Rrs1	102.075	107.213	103.539	142.25	135.593	132.619	-0.391863	1.15859e-08	4.348e-07	FALSE	TRUE
Zcchc24	54.8514	55.856	55.8144	40.9921	40.63	43.3047	0.414578	1.19016e-08	4.45161e-07	TRUE	FALSE
Bmp5	24.5706	21.996	20.4535	14.075	10.2993	14.8893	0.770681	1.21978e-08	4.54721e-07	TRUE	FALSE
Ociad2	4.1472	4.85704	4.96221	2.3835	2.37845	1.99222	1.04762	1.32654e-08	4.92883e-07	TRUE	FALSE
Ptms	183.248	195.476	204.597	143.791	150.89	126.16	0.471048	1.35441e-08	5.0158e-07	TRUE	FALSE
Nop2	182.706	192.012	186.041	247.247	240.42	241.583	-0.379017	1.36541e-08	5.03198e-07	FALSE	TRUE
Slc7a1	62.4789	64.6146	60.86	100.456	90.9484	172.044	-0.951365	1.36775e-08	5.03198e-07	FALSE	TRUE
Dlk1	713.151	654.347	580.182	907.949	895.846	862.507	-0.453081	1.38338e-08	5.05752e-07	FALSE	TRUE
Mpp3	9.27388	7.0865	7.13057	12.6572	15.7327	13.9036	-0.848131	1.38371e-08	5.05752e-07	FALSE	TRUE
Mt1	47.0571	75.6823	54.9179	26.3623	28.2577	39.2992	0.919649	1.4376e-08	5.23744e-07	TRUE	FALSE
Mak16	82.6522	86.093	81.105	111.593	106.048	108.943	-0.386371	1.51752e-08	5.51073e-07	FALSE	TRUE
Isyna1	171.911	171.728	174.511	240.528	240.703	212.728	-0.421469	1.5684e-08	5.6771e-07	FALSE	TRUE
Cspg4	5.85609	4.67789	5.19155	2.52733	2.66212	2.70523	0.993188	1.62568e-08	5.86553e-07	TRUE	FALSE
Epb4.1l3	104.555	96.6034	106.583	76.4363	77.6814	80.381	0.392062	1.94206e-08	6.98456e-07	TRUE	FALSE
Dusp5	7.27323	6.0713	7.33906	10.9723	11.4558	13.5052	-0.797128	2.03383e-08	7.26803e-07	FALSE	TRUE
Vnn1	5.79357	7.02679	5.2541	3.28758	2.16024	2.93591	1.10652	2.02803e-08	7.26803e-07	TRUE	FALSE
Fam185a	19.5898	19.7865	20.5577	29.5266	26.0975	32.987	-0.564309	2.04253e-08	7.27596e-07	FALSE	TRUE
Rprm	16.5679	25.4597	32.9424	4.64371	12.3505	7.54948	1.61129	2.04975e-08	7.27857e-07	TRUE	FALSE
Mgst1	24.5289	25.6786	25.0612	17.979	17.1292	16.9863	0.53081	2.1239e-08	7.51807e-07	TRUE	FALSE
2010111I01Rik	27.1964	29.5205	29.94	39.3277	43.9686	39.0056	-0.496791	2.13099e-08	7.51945e-07	FALSE	TRUE
Creb3l2	40.4716	37.443	43.0127	27.328	27.4067	31.0787	0.494633	2.2192e-08	7.80617e-07	TRUE	FALSE
Map6	3.10519	2.20956	3.08574	7.39707	5.01874	5.9557	-1.13	2.24881e-08	7.86332e-07	FALSE	TRUE
Tek	59.1653	58.1252	62.2778	40.2935	42.2229	48.3586	0.456285	2.25647e-08	7.86332e-07	TRUE	FALSE
Tnrc18	212.216	205.747	207.078	149.852	152.853	171.96	0.39702	2.25256e-08	7.86332e-07	TRUE	FALSE
1810032O08Rik	16.4012	15.0091	13.031	20.8351	23.5226	26.3183	-0.669088	2.30309e-08	8.00091e-07	FALSE	TRUE
Etnk2	4.6682	6.29027	4.96221	2.05474	2.59665	2.81008	1.09393	2.36516e-08	8.19118e-07	TRUE	FALSE
Car7	11.608	9.87333	10.1538	6.67791	5.23695	5.85085	0.831233	2.43197e-08	8.39666e-07	TRUE	FALSE
Pdzd7	2.35494	3.28447	3.25254	1.15065	1.4838	1.04854	1.2722	2.48944e-08	8.56871e-07	TRUE	FALSE
Nolc1	398.027	390.295	385.926	525.767	506.413	486.333	-0.370926	2.58115e-08	8.8572e-07	FALSE	TRUE
Foxn2	36.5537	37.9208	35.4652	50.1357	46.107	52.9093	-0.440092	2.62374e-08	8.9759e-07	FALSE	TRUE
Spon1	10.0658	8.73869	11.1962	15.6982	15.7981	17.0702	-0.695337	2.73182e-08	9.31725e-07	FALSE	TRUE
Nynrin	342.196	324.864	329.132	228.836	220.89	275.745	0.457474	2.77411e-08	9.4328e-07	TRUE	FALSE
Ptch1	68.1891	80.4597	90.4873	44.855	52.8277	59.1586	0.60858	2.79852e-08	9.48706e-07	TRUE	FALSE
Kdm2b	160.261	166.354	171.551	219.467	214.104	212.182	-0.374361	2.86318e-08	9.67705e-07	FALSE	TRUE
Bcl6b	24.4039	24.7231	26.3331	16.2325	16.5837	18.7479	0.54921	2.93153e-08	9.87828e-07	TRUE	FALSE
Moxd1	12.6292	14.8299	15.0743	5.56835	9.33923	6.41706	0.996894	2.98629e-08	1.00327e-06	TRUE	FALSE
Vwa5a	12.9418	14.7702	14.0943	8.48608	8.96828	8.3254	0.697689	3.13014e-08	1.04846e-06	TRUE	FALSE
Trim12c	4.9808	4.43902	4.56606	2.50678	2.37845	2.24387	0.970984	3.2152e-08	1.07374e-06	TRUE	FALSE
Cthrc1	27.1131	21.3192	20.8496	12.9654	10.4084	15.8749	0.819225	3.31898e-08	1.09536e-06	TRUE	FALSE
Ddx21	458.63	454.93	432.358	604.525	545.341	601.568	-0.379957	3.3163e-08	1.09536e-06	FALSE	TRUE
Fbln1	172.494	162.89	174.615	225.569	221.654	214.971	-0.376791	3.29121e-08	1.09536e-06	FALSE	TRUE
Slc7a11	8.12767	7.80312	7.7769	13.7257	12.1323	20.845	-0.978149	3.30759e-08	1.09536e-06	FALSE	TRUE
Calcoco1	49.0995	49.0083	52.7287	35.3004	38.8189	37.9361	0.428857	3.39171e-08	1.11608e-06	TRUE	FALSE
Cldn10	4.7724	4.12052	6.65103	10.1915	9.38287	12.7502	-1.05673	3.48131e-08	1.14222e-06	FALSE	TRUE
Bach2	69.8771	73.8509	70.3466	95.8126	89.7264	118.611	-0.506674	3.50826e-08	1.1477e-06	FALSE	TRUE
Tmem88	40.034	40.628	41.3656	31.7663	26.4684	28.8558	0.486248	3.60618e-08	1.17631e-06	TRUE	FALSE
Fmo1	6.52298	7.16613	8.2356	2.87664	2.83668	4.55066	1.09398	3.71674e-08	1.20885e-06	TRUE	FALSE
Ptn	164.596	183.572	151.41	242.316	266.495	212.434	-0.529704	3.73101e-08	1.20999e-06	FALSE	TRUE
Igfbp3	70.6274	69.9892	67.511	46.0878	47.8745	57.3131	0.46027	3.78698e-08	1.2246e-06	TRUE	FALSE
Rarg	179.83	179.412	181.433	141.613	140.787	139.372	0.35829	3.80215e-08	1.22597e-06	TRUE	FALSE
Smarcd3	32.1981	30.9338	29.1686	21.5953	22.8026	20.7191	0.503429	3.87038e-08	1.2444e-06	TRUE	FALSE
Eef2k	106.827	108.527	110.649	74.8131	82.7438	88.3289	0.406949	3.97151e-08	1.27327e-06	TRUE	FALSE
Nrep	258.523	259.354	262.726	188.913	212.511	181.775	0.420648	4.11021e-08	1.31109e-06	TRUE	FALSE
Plcg2	12.3374	16.1636	13.6773	25.5404	25.792	19.7125	-0.751707	4.11285e-08	1.31109e-06	FALSE	TRUE
Tshz3	7.37743	8.55954	7.38076	11.8559	13.2015	17.8671	-0.879828	4.15846e-08	1.32187e-06	FALSE	TRUE
Mapk12	19.4022	21.4984	18.2434	30.3485	34.0184	26.528	-0.619496	4.25369e-08	1.34833e-06	FALSE	TRUE
Syt13	7.71087	7.16613	8.54834	3.9862	4.36413	4.5926	0.855476	4.42841e-08	1.39975e-06	TRUE	FALSE
Vegfc	41.1177	39.135	40.0104	28.7047	29.4578	30.7432	0.435782	4.48323e-08	1.4131e-06	TRUE	FALSE
Odc1	269.443	270.382	293.708	360.484	362.288	354.469	-0.370037	4.70374e-08	1.47845e-06	FALSE	TRUE
Pdlim5	43.0141	45.6442	47.7873	31.2937	34.0402	35.0631	0.442713	4.95793e-08	1.55399e-06	TRUE	FALSE
Snhg5	52.288	50.3221	43.2212	62.2175	70.9389	87.4481	-0.597069	5.47329e-08	1.71075e-06	FALSE	TRUE
Rnasel	5.66853	5.43431	5.2541	2.50678	3.31674	2.34873	1.00187	5.62044e-08	1.75186e-06	TRUE	FALSE
S100a6	8.23187	8.77851	10.6958	5.42452	5.04057	4.46678	0.891201	5.69644e-08	1.77063e-06	TRUE	FALSE
Rab11fip4	35.3658	32.5263	31.2953	22.9925	23.3917	24.7036	0.480476	6.05361e-08	1.87645e-06	TRUE	FALSE
Barx2	6.7939	6.66848	6.25488	2.93828	3.33856	4.11027	0.92442	6.4551e-08	1.99539e-06	TRUE	FALSE
Eya4	13.5878	12.0033	14.8449	6.78064	9.01192	7.38171	0.803397	6.54506e-08	2.01764e-06	TRUE	FALSE
Mvb12b	94.4269	95.7474	95.4495	72.5323	74.1683	74.8237	0.366669	6.7182e-08	2.06534e-06	TRUE	FALSE
Ctnnd2	13.296	12.7199	12.4889	7.08886	6.3498	8.93355	0.782672	6.94526e-08	2.12931e-06	TRUE	FALSE
Shmt2	169.535	178.397	180.578	227.932	231.277	313.178	-0.547391	7.37813e-08	2.24973e-06	FALSE	TRUE
Snai2	39.6797	37.861	36.049	27.4513	24.8755	29.3171	0.476141	7.36606e-08	2.24973e-06	TRUE	FALSE
Narf	83.7567	87.2476	91.1128	60.4916	68.3858	68.2808	0.410959	7.56127e-08	2.29932e-06	TRUE	FALSE
Slc3a2	103.805	105.382	108.626	145.722	144.387	228.833	-0.7074	8.62805e-08	2.61663e-06	FALSE	TRUE
Sdr42e1	4.043	3.84184	4.10737	1.86981	2.02932	2.18096	0.979118	9.13074e-08	2.75772e-06	TRUE	FALSE
Slmo1	5.68937	5.15563	5.52515	8.67101	9.79746	9.49976	-0.772463	9.14244e-08	2.75772e-06	FALSE	TRUE
Plekhg1	32.4065	30.4759	32.3169	21.0816	17.5001	24.5568	0.591942	9.67379e-08	2.91018e-06	TRUE	FALSE
Fat4	40.2007	41.7029	40.4065	17.5475	19.7695	31.2884	0.834074	9.92854e-08	2.97883e-06	TRUE	FALSE
Gas5	176.996	167.03	138.358	210.323	239.852	225.708	-0.486538	1.02106e-07	3.05528e-06	FALSE	TRUE
Mettl7a1	18.4436	17.6366	21.0164	12.2668	12.8087	12.4986	0.60348	1.04146e-07	3.10803e-06	TRUE	FALSE
Tmem119	97.9906	92.8013	109.523	71.3406	76.5686	77.1305	0.416263	1.05595e-07	3.14292e-06	TRUE	FALSE
Vat1	52.1421	58.6826	54.8553	41.7729	39.6481	42.7594	0.415955	1.0688e-07	3.17276e-06	TRUE	FALSE
Slc22a23	25.9877	24.3449	25.6659	16.7667	16.0382	19.4609	0.539757	1.09195e-07	3.23292e-06	TRUE	FALSE
Ccne1	139.692	147.682	140.797	220.022	216.024	170.325	-0.50198	1.15196e-07	3.39269e-06	FALSE	TRUE
Ube2h	67.4597	66.8241	73.0362	52.7657	54.0933	52.0914	0.383253	1.14915e-07	3.39269e-06	TRUE	FALSE
Aadat	8.41944	7.68368	7.35991	4.3766	4.60415	4.48775	0.800579	1.17796e-07	3.46017e-06	TRUE	FALSE
H2afv	192.209	199.477	197.779	144.263	162.04	140.441	0.400028	1.21234e-07	3.55188e-06	TRUE	FALSE
6330403K07Rik	56.6853	58.4637	58.8584	40.8893	46.6961	37.0763	0.481328	1.24747e-07	3.64528e-06	TRUE	FALSE
Cadm3	10.1909	8.04199	9.15298	5.30123	5.04057	5.32658	0.804705	1.32729e-07	3.86846e-06	TRUE	FALSE
Efnb2	113.912	123.556	124.514	90.4291	96.2071	92.1666	0.376747	1.34809e-07	3.9189e-06	TRUE	FALSE
Fam203a	26.217	26.1763	25.5199	37.5812	35.8077	33.5323	-0.456592	1.36164e-07	3.94806e-06	FALSE	TRUE
Nusap1	116.351	120.112	112.984	81.2855	92.7377	92.0198	0.393535	1.38241e-07	3.99794e-06	TRUE	FALSE
Megf6	124.624	116.649	120.865	93.2647	91.2757	97.9964	0.358021	1.40407e-07	4.05016e-06	TRUE	FALSE
Eln	3.91796	4.06081	4.23247	2.15748	2.16024	1.97125	0.956545	1.43077e-07	4.11657e-06	TRUE	FALSE
Prkg1	13.0876	12.4014	12.76	5.75327	6.30616	9.05938	0.856565	1.48997e-07	4.27595e-06	TRUE	FALSE
Sssca1	55.0598	57.8466	53.3333	75.0186	75.8703	68.6374	-0.400995	1.503e-07	4.30235e-06	FALSE	TRUE
Grin3a	4.2514	3.56316	4.92051	2.21912	1.3747	2.15999	1.14251	1.50743e-07	4.30404e-06	TRUE	FALSE
Kcnq4	3.85543	4.08071	3.66953	2.21912	1.85475	1.55184	1.04323	1.58394e-07	4.51101e-06	TRUE	FALSE
Cntnap2	2.93847	3.46363	3.08574	1.08901	1.74565	1.46795	1.14242	1.6038e-07	4.55601e-06	TRUE	FALSE
Pcolce2	5.21005	5.43431	5.14985	9.45181	8.4664	8.80773	-0.758634	1.63268e-07	4.62634e-06	FALSE	TRUE
Il1rap	4.64736	4.99638	4.58691	7.64363	7.89907	10.6741	-0.880969	1.68344e-07	4.75815e-06	FALSE	TRUE
Pcsk6	7.50247	7.72349	8.44409	13.1709	11.4777	13.5891	-0.69215	1.72926e-07	4.87538e-06	FALSE	TRUE
Satb1	70.9817	65.8886	65.5929	48.4919	52.6968	53.6013	0.387391	1.7876e-07	5.02723e-06	TRUE	FALSE
Card10	38.9086	38.6573	40.0312	30.4102	27.2321	29.7575	0.427837	1.86997e-07	5.24574e-06	TRUE	FALSE
Bves	5.33509	5.03619	5.77534	9.76002	8.02999	11.5759	-0.863256	1.88657e-07	5.2791e-06	FALSE	TRUE
Sgce	79.2135	83.8835	95.1993	65.8955	54.5734	65.2191	0.475942	1.89217e-07	5.28159e-06	TRUE	FALSE
Daam2	65.9383	76.6975	64.2168	86.0114	97.0145	101.478	-0.459644	1.9518e-07	5.43453e-06	FALSE	TRUE
Ybx3	320.022	328.706	319.896	419.167	414.308	397.082	-0.345293	1.99216e-07	5.53317e-06	FALSE	TRUE
Lyar	194.939	193.625	197.05	255.343	248.297	241.646	-0.347854	2.04354e-07	5.66187e-06	FALSE	TRUE
Ano4	1.79226	1.73181	1.04248	3.30813	4.1241	3.10367	-1.20307	2.10764e-07	5.82509e-06	FALSE	TRUE
Tmem150a	9.10716	8.65907	9.86187	14.4654	14.4671	13.9246	-0.633501	2.14919e-07	5.92533e-06	FALSE	TRUE
Bcl11a	17.7558	19.1893	19.2025	12.2257	12.2196	13.5052	0.565023	2.1868e-07	6.01424e-06	TRUE	FALSE
Fbxl2	10.3576	10.3113	10.9043	6.73955	6.32798	6.73162	0.672722	2.20077e-07	6.03784e-06	TRUE	FALSE
5930403L14Rik	15.0258	18.7912	13.6565	28.4993	33.1455	21.6628	-0.810769	2.23166e-07	6.10766e-06	FALSE	TRUE
Dopey2	7.46079	7.10641	6.00469	3.2054	3.14217	4.40386	0.935439	2.24387e-07	6.12616e-06	TRUE	FALSE
Mmp11	28.5927	30.7347	29.0644	21.2255	22.2352	19.2721	0.494905	2.25375e-07	6.13819e-06	TRUE	FALSE
Irx1	5.12669	3.80203	4.39927	1.68489	2.40027	2.34873	1.05059	2.26681e-07	6.15881e-06	TRUE	FALSE
Myzap	19.6315	21.7373	19.411	14.0133	13.747	13.9665	0.542686	2.30176e-07	6.23867e-06	TRUE	FALSE
Nlrp6	13.692	8.91785	14.0526	4.19167	5.76065	7.3188	1.08557	2.33255e-07	6.30689e-06	TRUE	FALSE
Dyrk1b	28.1551	25.9772	26.8543	18.1023	20.3368	19.1253	0.49263	2.36212e-07	6.37147e-06	TRUE	FALSE
Slc7a5	89.4669	91.3283	88.444	130.682	127.782	238.291	-0.883634	2.41818e-07	6.50706e-06	FALSE	TRUE
Chac1	0.416804	0.159247	0.333594	0.452043	0.589157	25.102	-4.83455	2.50215e-07	6.7169e-06	FALSE	TRUE
Plce1	46.8071	48.7297	43.0127	28.1499	30.287	37.7055	0.527204	2.53666e-07	6.79329e-06	TRUE	FALSE
Abcd2	16.1303	15.0887	16.0542	8.83538	9.44833	11.6178	0.660575	2.65008e-07	7.08013e-06	TRUE	FALSE
2510009E07Rik	19.4647	17.7362	20.2241	12.8627	12.8742	13.652	0.543545	2.741e-07	7.30565e-06	TRUE	FALSE
Cdx1	3.9388	4.08071	4.23247	7.4998	7.85543	6.41706	-0.828875	2.83077e-07	7.52702e-06	FALSE	TRUE
Creb3l1	6.06449	7.94246	5.77534	3.73963	2.70576	3.56503	0.981629	2.84008e-07	7.53392e-06	TRUE	FALSE
Rbpms	126.729	126.602	128.371	102.347	99.3493	100.89	0.335056	2.90067e-07	7.67652e-06	TRUE	FALSE
Lrrc75b	8.29439	8.81832	8.63174	5.09576	5.21513	5.17978	0.732762	3.00214e-07	7.92635e-06	TRUE	FALSE
Mars	206.464	207.758	196.862	257.069	247.38	283.546	-0.36682	3.19472e-07	8.41502e-06	FALSE	TRUE
Atf7ip	101.596	92.1444	97.1175	75.5734	73.3828	77.6338	0.360111	3.23922e-07	8.47255e-06	TRUE	FALSE
Gm16515	58.1233	60.2353	64.1959	39.3688	49.7729	37.5377	0.527374	3.22801e-07	8.47255e-06	TRUE	FALSE
Irx4	5.25173	5.43431	4.92051	3.04102	2.31299	2.95688	0.907348	3.2385e-07	8.47255e-06	TRUE	FALSE
Msx1os	4.79324	2.84654	3.00234	6.55462	9.40469	7.17201	-1.11971	3.32244e-07	8.67003e-06	FALSE	TRUE
Zfp599	8.21103	9.39559	10.2372	14.0133	14.2925	15.6861	-0.6597	3.46933e-07	9.03234e-06	FALSE	TRUE
Tns4	12.9834	14.1929	16.2418	9.26688	7.52812	9.62559	0.715886	3.69278e-07	9.59183e-06	TRUE	FALSE
Krt7	22.4449	23.7677	23.8728	17.7324	15.82	14.9941	0.529498	4.04053e-07	1.04708e-05	TRUE	FALSE
Col6a3	9.48228	10.0923	8.77769	2.65062	1.78929	5.5992	1.49647	4.14497e-07	1.06676e-05	TRUE	FALSE
Hexim1	57.8107	63.0619	61.6523	47.1357	47.2417	46.4293	0.374438	4.12855e-07	1.06676e-05	TRUE	FALSE
Nudt19	32.5315	34.5367	32.5045	44.0125	42.703	43.8499	-0.390849	4.14309e-07	1.06676e-05	FALSE	TRUE
Ism1	9.56565	9.69418	10.0287	6.08203	6.10978	5.82988	0.700384	4.45641e-07	1.14168e-05	TRUE	FALSE
Ulk2	59.1653	56.5129	58.8584	43.766	46.3252	45.1291	0.368239	4.44629e-07	1.14168e-05	TRUE	FALSE
Ntf3	7.89843	7.64387	8.81938	4.3766	4.866	5.07493	0.766595	4.69969e-07	1.20126e-05	TRUE	FALSE
Lama2	4.33476	4.63808	4.19077	1.84927	1.78929	2.83105	1.02357	4.79048e-07	1.22168e-05	TRUE	FALSE
Nedd9	37.0747	37.0648	42.429	25.15	28.6723	30.0092	0.475659	4.83481e-07	1.23019e-05	TRUE	FALSE
Hdac5	62.333	65.3312	64.3419	47.7316	52.1077	48.4215	0.373182	4.93874e-07	1.25379e-05	TRUE	FALSE
Slc6a6	149.633	146.07	151.368	184.043	181.613	200.9	-0.341747	4.97385e-07	1.25986e-05	FALSE	TRUE
Lpcat4	16.0469	16.6612	16.6588	23.609	24.7882	21.8306	-0.508249	5.031e-07	1.27146e-05	FALSE	TRUE
Smyd2	80.589	83.147	85.5459	108.552	103.888	103.868	-0.343577	5.15151e-07	1.29899e-05	FALSE	TRUE
Cdk19	27.8216	27.4502	27.6883	17.8351	20.4896	21.2015	0.479078	5.22999e-07	1.31303e-05	TRUE	FALSE
Mmp2	179.622	176.904	185.374	230.994	239.263	220.235	-0.349592	5.23059e-07	1.31303e-05	FALSE	TRUE
Pdlim3	9.2322	9.59465	10.0495	13.8079	14.9908	15.099	-0.603989	5.28794e-07	1.32446e-05	FALSE	TRUE
Zfhx4	65.3965	57.0105	55.0013	29.7732	30.1997	47.8134	0.718783	5.31122e-07	1.32733e-05	TRUE	FALSE
Mmrn1	34.2821	34.3576	32.0458	25.8486	22.1916	25.4376	0.454156	5.3383e-07	1.33113e-05	TRUE	FALSE
C1qbp	274.632	274.761	275.903	351.587	345.595	337.147	-0.325712	5.45968e-07	1.35838e-05	FALSE	TRUE
Optn	3.06351	3.30438	3.83633	5.65054	5.84793	7.17201	-0.87131	5.57177e-07	1.3832e-05	FALSE	TRUE
9430008C03Rik	29.7598	25.3999	25.9369	33.3895	39.9972	43.2417	-0.524155	5.7018e-07	1.41236e-05	FALSE	TRUE
1700017B05Rik	148.424	139.68	146.885	113.709	110.74	120.33	0.33523	5.81415e-07	1.43386e-05	TRUE	FALSE
Arrb1	111.266	116.808	113.484	84.5526	82.0019	96.6333	0.376	5.80771e-07	1.43386e-05	TRUE	FALSE
Snhg6	31.1978	31.2523	27.1253	39.0606	39.6481	50.8541	-0.532392	5.88542e-07	1.44825e-05	FALSE	TRUE
Pgf	14.6507	11.5255	16.638	5.1163	8.83735	7.94792	0.967301	5.97537e-07	1.46717e-05	TRUE	FALSE
Grm4	2.60502	2.98589	1.79307	1.15065	1.11285	0.943685	1.20222	6.05645e-07	1.48383e-05	TRUE	FALSE
Cotl1	213.883	220.299	218.108	168.304	179.977	163.509	0.350006	6.35043e-07	1.55247e-05	TRUE	FALSE
Atp2b4	21.3404	23.3496	20.8913	13.9928	15.5581	16.0007	0.526097	6.37711e-07	1.5556e-05	TRUE	FALSE
E130012A19Rik	72.5238	66.6649	66.5728	93.7784	95.6835	82.9604	-0.40486	6.40127e-07	1.55811e-05	FALSE	TRUE
Dnm1	87.1953	82.8484	89.4865	65.1558	65.811	71.6362	0.357162	6.90824e-07	1.67787e-05	TRUE	FALSE
Gmip	12.5875	11.2667	10.7167	16.0475	19.224	17.4267	-0.607855	6.93222e-07	1.68005e-05	FALSE	TRUE
Arhgef17	217.801	199.995	221.798	171.653	163.764	168.311	0.344442	7.07209e-07	1.71026e-05	TRUE	FALSE
Ago1	140.588	140.416	152.202	104.073	119.708	111.061	0.371641	7.16528e-07	1.72536e-05	TRUE	FALSE
Itgal	3.50115	3.50344	2.6896	1.58215	1.61473	1.59378	1.01628	7.16111e-07	1.72536e-05	TRUE	FALSE
Plk3	1.97982	1.93087	1.79307	3.80127	3.33856	3.75377	-0.932927	7.69737e-07	1.84951e-05	FALSE	TRUE
Gja4	5.25173	6.66848	6.46338	8.81484	13.9652	11.1145	-0.88151	7.75229e-07	1.85082e-05	FALSE	TRUE
Irgq	44.3062	45.5845	47.0993	33.0813	36.9423	34.3711	0.392211	7.72388e-07	1.85082e-05	TRUE	FALSE
Slc16a6	9.06548	8.20123	9.13213	13.5407	13.1142	21.9774	-0.88152	7.73854e-07	1.85082e-05	FALSE	TRUE
Tspan4	19.1938	19.9457	20.5577	27.2048	27.0358	27.1362	-0.446906	7.79736e-07	1.85763e-05	FALSE	TRUE
Slc1a3	18.2768	17.2584	17.6805	25.335	23.3263	25.0391	-0.470035	7.83779e-07	1.8633e-05	FALSE	TRUE
Ncl	2835.93	2762.4	2802.12	3607.63	3316.34	3570.67	-0.321116	8.06155e-07	1.91244e-05	FALSE	TRUE
Ror2	96.365	91.9454	99.3484	117.079	119.948	127.062	-0.339975	8.53558e-07	2.02063e-05	FALSE	TRUE
Polr3d	63.6459	62.7633	61.5272	80.9568	81.9365	77.0047	-0.352133	8.76244e-07	2.06997e-05	FALSE	TRUE
Rbms2	137.379	136.037	135.356	111.387	109.343	102.883	0.337011	9.12518e-07	2.15113e-05	TRUE	FALSE
Hoxa2	16.0678	13.4962	13.4063	9.534	9.16466	9.05938	0.630044	9.27542e-07	2.18196e-05	TRUE	FALSE
Tenm3	309.498	275.976	292.27	177.797	163.917	247.707	0.574462	9.37653e-07	2.20113e-05	TRUE	FALSE
Aldh6a1	21.8614	22.6927	22.2674	14.4859	13.8997	17.5945	0.539074	9.59164e-07	2.24693e-05	TRUE	FALSE
8430427H17Rik	157.656	146.687	154.683	112.97	114.624	130.858	0.356749	9.72376e-07	2.27313e-05	TRUE	FALSE
Nle1	47.3072	48.3116	45.8274	60.4299	63.629	58.4875	-0.367851	9.97654e-07	2.32738e-05	FALSE	TRUE
Pim3	48.6202	49.2671	47.3912	59.7313	60.9014	64.7158	-0.351355	1.0192e-06	2.36909e-05	FALSE	TRUE
Robo1	115.35	104.805	113.172	72.3885	80.8891	94.3475	0.428763	1.01976e-06	2.36909e-05	TRUE	FALSE
Gatsl2	14.8382	15.447	16.3669	8.69155	11.5868	7.94792	0.725454	1.0492e-06	2.43244e-05	TRUE	FALSE
Dcbld2	146.986	134.504	151.139	183.653	175.22	191.358	-0.346987	1.09113e-06	2.52445e-05	FALSE	TRUE
Kif21b	146.965	136.256	143.466	100.066	94.8324	123.077	0.424173	1.11202e-06	2.56748e-05	TRUE	FALSE
Eogt	21.7155	22.1951	20.8079	31.0266	28.5632	28.3525	-0.442364	1.18981e-06	2.74144e-05	FALSE	TRUE
Ctsh	5.08501	7.54434	6.37998	11.3422	12.4814	9.6885	-0.816867	1.20014e-06	2.7596e-05	FALSE	TRUE
Cgnl1	143.818	141.81	149.033	99.6549	111.853	122.784	0.378808	1.21385e-06	2.78541e-05	TRUE	FALSE
Trmt61a	40.9301	44.649	41.7618	59.0327	52.7841	54.6289	-0.386347	1.22196e-06	2.79829e-05	FALSE	TRUE
Sept11	878.768	882.887	849.663	1066.35	1103.88	1068.59	-0.310683	1.22721e-06	2.80459e-05	FALSE	TRUE
Yars	153.092	162.731	155.601	189.94	193.876	221.976	-0.361774	1.24084e-06	2.82998e-05	FALSE	TRUE
Abtb2	66.1676	65.1918	67.1774	46.2111	50.3838	55.8242	0.381388	1.25266e-06	2.85113e-05	TRUE	FALSE
Dock5	36.1994	34.2581	33.5679	25.15	25.7047	27.5556	0.407761	1.29791e-06	2.94815e-05	TRUE	FALSE
Hey1	20.1108	19.4282	18.4936	24.061	28.0831	29.7366	-0.496414	1.39277e-06	3.15722e-05	FALSE	TRUE
Got1	66.7094	67.1227	71.0555	88.5182	84.4022	86.1689	-0.338685	1.40002e-06	3.16727e-05	FALSE	TRUE
Cpne5	5.96029	6.11111	7.08887	2.99992	3.44766	4.19416	0.848008	1.43481e-06	3.23943e-05	TRUE	FALSE
Gabarapl1	74.0452	74.8462	77.6022	59.4231	60.334	60.6685	0.328056	1.49829e-06	3.37597e-05	TRUE	FALSE
Cnnm1	2.08402	2.09012	2.21006	3.84236	3.44766	5.55726	-1.00858	1.54097e-06	3.46517e-05	FALSE	TRUE
Plekha6	18.2977	15.6261	14.553	25.4377	20.7732	26.2135	-0.579461	1.55817e-06	3.49683e-05	FALSE	TRUE
Wbscr17	4.85576	5.29497	4.39927	7.9313	7.41901	9.49976	-0.771696	1.58692e-06	3.55425e-05	FALSE	TRUE
Fzd10	99.2826	93.3189	107.792	133.599	133.87	121.358	-0.372321	1.61941e-06	3.61981e-05	FALSE	TRUE
Peg10	2726.86	2375.85	2417.01	1858.51	1618.17	2110.58	0.428528	1.62462e-06	3.62423e-05	TRUE	FALSE
Elf1	17.4432	18.5324	17.8264	11.4449	12.3941	13.3374	0.533415	1.65642e-06	3.68783e-05	TRUE	FALSE
Impdh1	87.5288	90.0941	91.9468	116.565	111.023	110.956	-0.328713	1.6599e-06	3.68826e-05	FALSE	TRUE
Cars	89.3627	87.3471	86.234	109.949	107.117	143.503	-0.455549	1.70376e-06	3.77824e-05	FALSE	TRUE
Gng2	79.9846	77.9913	80.3752	97.292	95.8144	110.6	-0.34964	1.71101e-06	3.78683e-05	FALSE	TRUE
Dock10	5.27257	6.56895	5.44175	2.3835	2.83668	3.79571	0.938886	1.74723e-06	3.85939e-05	TRUE	FALSE
Nsun2	387.836	391.271	395.496	485.987	470.06	491.492	-0.301437	1.78764e-06	3.94089e-05	FALSE	TRUE
Nos1	2.95931	3.32429	2.8564	1.33558	1.11285	1.90834	1.06665	1.79483e-06	3.94898e-05	TRUE	FALSE
Adrb3	1.95898	1.91097	1.79307	3.90401	3.73133	3.14562	-0.927821	1.83423e-06	4.02777e-05	FALSE	TRUE
Mrto4	74.1702	75.2642	72.9319	100.395	95.1379	89.1258	-0.356287	1.92382e-06	4.21624e-05	FALSE	TRUE
Traf4	162.929	182.677	171.363	229.33	232.346	206.625	-0.370369	1.93747e-06	4.23789e-05	FALSE	TRUE
Islr	6.85642	7.62396	6.71357	4.80809	3.36038	2.81008	0.947763	1.9625e-06	4.28428e-05	TRUE	FALSE
Chpf	55.81	57.0304	57.67	78.7171	80.5181	66.5193	-0.404824	1.98458e-06	4.32408e-05	FALSE	TRUE
Cldn5	67.814	65.8487	66.1975	54.5328	52.6968	47.7714	0.366664	1.99069e-06	4.32899e-05	TRUE	FALSE
Mest	2295.19	2335.92	2171.28	2971.96	2959.97	2685.94	-0.341286	2.06845e-06	4.48938e-05	FALSE	TRUE
Tnfrsf21	33.0109	33.4419	33.2134	45.2043	43.0085	41.1447	-0.376198	2.20271e-06	4.77156e-05	FALSE	TRUE
Antxr1	62.4997	62.5045	62.7782	76.3542	77.7687	81.5134	-0.327484	2.24823e-06	4.86076e-05	FALSE	TRUE
Stx2	32.4273	32.2277	33.6096	25.0267	25.552	23.0469	0.416476	2.31078e-06	4.98639e-05	TRUE	FALSE
Rpl10a	12.5666	11.3265	11.092	16.3146	18.6566	16.6089	-0.55981	2.35009e-06	5.0615e-05	FALSE	TRUE
Mthfd1l	103.68	99.2708	97.5762	125.647	121.214	163.278	-0.44865	2.4683e-06	5.30591e-05	FALSE	TRUE
Atf4	195.856	224.22	191.17	250.493	267.979	349.583	-0.506002	2.51825e-06	5.40293e-05	FALSE	TRUE
Ncs1	99.5744	96.8821	97.4511	130.168	129.069	115.381	-0.350052	2.55513e-06	5.47159e-05	FALSE	TRUE
Fjx1	50.6625	51.0985	53.6877	70.3954	63.7599	64.2335	-0.352012	2.59852e-06	5.5539e-05	FALSE	TRUE
Sec24d	25.3833	25.3999	24.0396	19.4789	16.9328	17.8881	0.462202	2.68284e-06	5.72322e-05	TRUE	FALSE
Creb5	3.25107	2.76692	2.87725	0.862991	0.938287	1.95028	1.24304	2.69075e-06	5.72919e-05	TRUE	FALSE
Slitrk6	20.4025	28.2067	17.1801	40.2935	41.5028	30.1979	-0.76708	2.70362e-06	5.7457e-05	FALSE	TRUE
Kif16b	32.4065	32.3272	33.3385	21.883	21.8424	27.3459	0.464415	2.73432e-06	5.79997e-05	TRUE	FALSE
Ddah2	305.934	313.08	318.561	240.302	264.051	227.47	0.357472	2.77495e-06	5.87504e-05	TRUE	FALSE
Gucd1	65.0214	67.1227	68.9914	50.6083	56.1227	50.6864	0.353723	2.81901e-06	5.95709e-05	TRUE	FALSE
Ak3	108.202	106.079	105.291	84.2649	88.199	84.3864	0.315252	2.83536e-06	5.98037e-05	TRUE	FALSE
Ntm	14.3172	14.2526	18.7021	9.12305	10.954	9.85627	0.659288	2.87794e-06	6.05879e-05	TRUE	FALSE
Add1	273.444	292.378	273.651	222.549	229.248	218.893	0.323872	3.05854e-06	6.42694e-05	TRUE	FALSE
Nop56	196.273	194.7	188.626	234.508	243.824	240.304	-0.31018	3.07435e-06	6.44808e-05	FALSE	TRUE
Pxn	150.029	151.882	154.12	121.661	121.912	126.999	0.299365	3.12961e-06	6.55176e-05	TRUE	FALSE
Dact1	54.3512	55.2986	47.9958	31.8074	42.2884	38.9637	0.479918	3.14409e-06	6.56981e-05	TRUE	FALSE
Fam126a	49.8706	56.0948	55.5434	65.1969	68.364	74.4882	-0.365197	3.21432e-06	6.70407e-05	FALSE	TRUE
Chchd4	62.8957	63.7387	61.548	84.2444	78.7943	75.9771	-0.344984	3.2459e-06	6.75738e-05	FALSE	TRUE
Kctd12	171.035	158.172	156.706	122.38	115.54	139.98	0.362621	3.3161e-06	6.89073e-05	TRUE	FALSE
Mapk8ip1	92.5721	88.1633	91.5298	72.8611	74.3647	65.995	0.352664	3.35616e-06	6.96108e-05	TRUE	FALSE
Ctps	233.973	235.606	229.596	290.294	293.073	283.567	-0.310253	3.41376e-06	7.0675e-05	FALSE	TRUE
Palld	55.4557	51.5364	51.5819	38.8551	35.7422	45.0243	0.406451	3.44487e-06	7.11876e-05	TRUE	FALSE
Ndufaf4	40.2841	41.7029	41.8243	60.5738	54.377	49.3442	-0.408185	3.46423e-06	7.14561e-05	FALSE	TRUE
Synpo	26.467	27.2512	25.4574	19.8077	20.1186	18.3494	0.442278	3.54369e-06	7.2961e-05	TRUE	FALSE
Eea1	19.4022	20.5429	20.0782	28.9718	24.0463	34.413	-0.542756	3.58581e-06	7.3693e-05	FALSE	TRUE
AI464131	13.0043	14.4119	11.4464	7.45871	9.27377	7.33977	0.691678	3.59372e-06	7.37206e-05	TRUE	FALSE
Capn1	11.8372	14.9493	13.1978	7.76692	9.01192	8.89161	0.639816	3.63792e-06	7.4491e-05	TRUE	FALSE
Arhgef10l	44.7022	47.9135	45.3062	34.91	36.8769	36.0488	0.3552	3.67055e-06	7.50224e-05	TRUE	FALSE
2900026A02Rik	28.8428	29.9584	26.5833	19.5817	21.3406	22.0613	0.439233	3.70105e-06	7.55081e-05	TRUE	FALSE
Crybg3	20.2775	17.2385	20.1407	12.6572	13.507	14.2392	0.51276	3.77587e-06	7.68948e-05	TRUE	FALSE
Pmp22	92.8222	90.5918	97.9306	71.5666	55.2935	77.0257	0.464364	3.82281e-06	7.77098e-05	TRUE	FALSE
Cdc25a	183.727	181.383	184.29	227.275	224.447	224.974	-0.300662	3.91371e-06	7.94136e-05	FALSE	TRUE
Impa2	23.0284	23.0112	22.4133	27.8828	31.3999	32.4418	-0.421964	4.02385e-06	8.14348e-05	FALSE	TRUE
Lrrn4	3.79291	3.0456	3.66953	6.51353	6.63347	5.30561	-0.812439	4.02783e-06	8.14348e-05	FALSE	TRUE
Tnnt3	2.56334	3.32429	3.02319	1.80817	1.20013	1.40504	1.01083	4.03723e-06	8.14779e-05	TRUE	FALSE
Elovl4	14.4422	14.9493	15.116	20.5063	19.3331	21.8725	-0.471557	4.06581e-06	8.19074e-05	FALSE	TRUE
Pcdhgc4	4.48064	4.69779	4.85796	2.44514	2.68394	2.95688	0.79539	4.1049e-06	8.25467e-05	TRUE	FALSE
5730457N03Rik	11.4413	10.1122	15.8249	5.05466	7.33173	7.78016	0.89019	4.13267e-06	8.29565e-05	TRUE	FALSE
Wdr74	79.0468	80.8976	80.7297	98.5043	99.2402	99.8419	-0.306199	4.2327e-06	8.48128e-05	FALSE	TRUE
Tle6	3.00099	2.80673	2.54365	5.34233	5.34605	4.25707	-0.838834	4.36587e-06	8.73251e-05	FALSE	TRUE
Hoxa13	12.129	11.6649	16.0542	6.57517	7.37537	9.41588	0.769722	4.39614e-06	8.76803e-05	TRUE	FALSE
Noc2l	328.15	330.239	334.907	412.243	383.694	443.721	-0.319665	4.39925e-06	8.76803e-05	FALSE	TRUE
Surf2	31.1144	31.8295	32.0667	41.1975	40.5864	40.18	-0.360271	4.40863e-06	8.77113e-05	FALSE	TRUE
Ctdsp2	286.928	270.024	281.449	224.563	231.779	216.46	0.317456	4.4251e-06	8.78832e-05	TRUE	FALSE
Prep	214.55	209.888	210.831	263.336	254.799	263.749	-0.299605	4.57423e-06	9.06844e-05	FALSE	TRUE
St3gal2	155.509	164.423	171.446	128.688	135.201	130.082	0.318779	4.64251e-06	9.18758e-05	TRUE	FALSE
Rpf2	68.3558	69.0735	67.7612	87.4703	83.4639	84.68	-0.317021	4.7372e-06	9.35847e-05	FALSE	TRUE
Yrdc	33.1984	36.2885	30.8574	44.9577	44.0777	42.5916	-0.391268	4.76261e-06	9.39213e-05	FALSE	TRUE
Gars	307.247	316.902	305.134	376.922	368.463	464.167	-0.380284	4.81102e-06	9.47097e-05	FALSE	TRUE
Carhsp1	151.112	148.677	151.806	122.257	125.752	116.493	0.309119	4.94948e-06	9.72646e-05	TRUE	FALSE
Itpr3	18.9646	18.612	19.1191	24.4103	26.0757	39.8025	-0.671288	4.99902e-06	9.80664e-05	FALSE	TRUE
Rabggtb	80.2764	82.0123	76.7683	96.1208	96.6436	107.916	-0.330837	5.13072e-06	0.000100474	FALSE	TRUE
Manf	140.588	136.594	149.45	207.303	190.538	164.642	-0.398845	5.1501e-06	0.000100678	FALSE	TRUE
Polr1e	45.9735	48.6102	45.0352	61.108	59.8322	56.6001	-0.346541	5.28958e-06	0.000103225	FALSE	TRUE
Pmaip1	4.4598	2.90626	4.00312	2.05474	1.41834	2.11805	1.02042	5.32118e-06	0.000103661	TRUE	FALSE
Wdr43	233.014	240.344	239.103	293.561	281.246	306.635	-0.307061	5.348e-06	0.000104003	FALSE	TRUE
Ahdc1	127.73	129.707	124.139	98.2577	96.5126	110.139	0.323564	5.41712e-06	0.000105165	TRUE	FALSE
Snap91	2.06318	1.91097	2.31431	4.13003	3.73133	3.54406	-0.859121	5.47228e-06	0.000106053	FALSE	TRUE
Vcan	171.369	143.442	155.455	84.7991	86.1915	134.8	0.620878	5.62411e-06	0.000108807	TRUE	FALSE
Ank3	98.97	95.4289	95.4704	70.0256	72.5972	84.1977	0.353824	5.67279e-06	0.000109184	TRUE	FALSE
Hbp1	109.619	104.785	110.857	79.2102	87.959	91.4326	0.330897	5.66012e-06	0.000109184	TRUE	FALSE
Pcmtd2	42.514	40.8668	43.8884	31.9101	33.8002	33.8678	0.353972	5.66571e-06	0.000109184	TRUE	FALSE
Gpc5	1.43797	1.83134	1.48032	2.50678	3.4913	3.35532	-0.974322	5.82324e-06	0.000111789	FALSE	TRUE
Spata5	52.6006	53.109	50.602	65.6284	61.7087	69.2874	-0.331057	5.82805e-06	0.000111789	FALSE	TRUE
Snx5	414.845	415.078	395.225	493.179	497.227	507.723	-0.290197	5.84337e-06	0.000111892	FALSE	TRUE
A830082K12Rik	3.68871	4.31958	4.10737	2.26021	2.50937	1.7196	0.901102	5.91513e-06	0.000113073	TRUE	FALSE
Timp3	89.196	85.5755	92.4472	62.7312	58.4575	78.0952	0.42306	6.10629e-06	0.000116528	TRUE	FALSE
Btg1	44.3062	44.8082	46.5363	29.917	37.0078	35.7342	0.402292	6.16919e-06	0.000117529	TRUE	FALSE
Clmp	94.4269	83.0474	92.7808	66.8818	72.379	73.3558	0.34603	6.23451e-06	0.000118572	TRUE	FALSE
Als2	51.8921	53.2085	53.3125	40.9304	40.5209	44.2903	0.333174	6.39578e-06	0.000121433	TRUE	FALSE
Mesdc1	87.6121	94.6526	82.2517	113.155	116.915	106.804	-0.348722	6.52601e-06	0.000123696	FALSE	TRUE
Eif3e	295.556	304.481	297.712	364.1	350.548	398.172	-0.309843	6.56777e-06	0.000124278	FALSE	TRUE
Gnl3	236.286	236.801	229.325	290.684	291.022	283.546	-0.300791	6.82023e-06	0.000128838	FALSE	TRUE
Dnajc2	127.855	127.139	129.184	158.77	154.643	155.855	-0.288656	6.85475e-06	0.000129212	FALSE	TRUE
Rnf126	93.4266	89.2183	90.529	109.579	113.685	113.62	-0.30243	6.86308e-06	0.000129212	FALSE	TRUE
Nfam1	9.10716	6.78791	10.3206	15.39	12.3068	15.791	-0.730891	7.02254e-06	0.000131993	FALSE	TRUE
Isl1	80.5473	78.7478	98.3268	52.6835	62.647	69.9585	0.475476	7.14282e-06	0.000134029	TRUE	FALSE
Fhdc1	5.29341	5.11582	6.23403	2.97937	3.14217	3.60697	0.773897	7.18962e-06	0.000134682	TRUE	FALSE
2810474O19Rik	113.037	101.62	111.942	81.4705	74.6265	94.725	0.380701	7.54492e-06	0.000141103	TRUE	FALSE
Eif2s2	159.24	165.159	156.414	195.098	194.116	201.508	-0.296979	7.72117e-06	0.000144159	FALSE	TRUE
Cux2	15.1091	15.1285	14.8866	20.0543	19.464	22.6904	-0.463238	7.92095e-06	0.000147643	FALSE	TRUE
Ddx39	224.074	232.899	232.077	307.081	298.397	266.727	-0.34005	7.95719e-06	0.000148072	FALSE	TRUE
Aldh1b1	6.62718	5.95187	7.42246	4.29441	3.53494	4.13124	0.740302	8.06991e-06	0.000149921	TRUE	FALSE
Pcdh12	35.074	33.2628	31.5872	25.2528	24.5046	26.8426	0.383349	8.16272e-06	0.000151395	TRUE	FALSE
Atrnl1	77.8589	78.4691	79.3953	60.5327	59.9631	67.6727	0.325011	8.34603e-06	0.000154539	TRUE	FALSE
Foxo1	32.5524	35.0941	33.2134	24.2048	23.6972	28.1847	0.406587	8.44879e-06	0.000156184	TRUE	FALSE
Srgap3	12.4833	12.7398	11.3005	7.27378	7.87725	8.95452	0.599546	8.71703e-06	0.000160878	TRUE	FALSE
Adamts2	2.39662	2.52805	1.93901	4.08893	4.3423	3.83765	-0.836193	9.06762e-06	0.000166771	FALSE	TRUE
Kank4	26.5712	25.9374	27.8134	20.9584	20.2277	17.6784	0.448265	9.07152e-06	0.000166771	TRUE	FALSE
Pdcd4	66.3552	64.6942	66.7187	49.0467	52.6314	56.1178	0.325771	9.08094e-06	0.000166771	TRUE	FALSE
Cttnbp2	5.75189	6.21064	4.92051	9.12305	8.05181	10.8209	-0.729246	9.33225e-06	0.000171106	FALSE	TRUE
Arhgef15	52.4131	54.1242	57.2113	44.1564	43.4449	42.1513	0.33567	9.52783e-06	0.000174407	TRUE	FALSE
Zfp811	8.25271	7.0666	8.88193	4.80809	4.42959	5.53629	0.710954	9.61611e-06	0.000175737	TRUE	FALSE
Kcng1	2.73006	2.38871	2.75215	4.767	3.97135	4.88619	-0.79227	9.73847e-06	0.000177684	FALSE	TRUE
Lmo7	14.1296	12.5805	16.3878	25.376	17.8493	22.7323	-0.61447	1.00301e-05	0.000182708	FALSE	TRUE
Plekha7	25.946	22.9714	27.0211	19.294	17.0201	19.1463	0.452807	1.01374e-05	0.000184362	TRUE	FALSE
Gab1	66.1051	64.9928	62.7365	48.6768	48.5945	56.0129	0.338562	1.02084e-05	0.000185353	TRUE	FALSE
Abcc1	39.8256	34.9946	37.154	47.5467	46.4125	67.9663	-0.532263	1.02884e-05	0.000186204	FALSE	TRUE
Kcnq5	1.22957	1.27398	1.25098	2.05474	2.2257	3.85862	-1.1147	1.02738e-05	0.000186204	FALSE	TRUE
Dsp	50.3082	53.4872	56.3148	38.9373	29.9379	44.4161	0.49874	1.03607e-05	0.000187209	TRUE	FALSE
Hey2	12.6292	12.6403	16.6797	20.157	18.9839	23.3405	-0.575071	1.05772e-05	0.000190815	FALSE	TRUE
Lphn1	182.143	169.24	177.493	140.01	139.958	150.172	0.298079	1.07881e-05	0.000194306	TRUE	FALSE
Lhx9	38.8669	58.1252	48.0583	89.6483	102.251	57.4599	-0.781515	1.08593e-05	0.000195276	FALSE	TRUE
Mbp	12.6083	13.0981	12.5723	8.73265	8.33548	9.24811	0.54035	1.13017e-05	0.000202906	TRUE	FALSE
Gabarap	146.798	159.367	156.81	123.716	130.226	117.73	0.316971	1.13628e-05	0.000203677	TRUE	FALSE
Col5a1	152.342	141.113	135.939	107.278	92.8686	124.671	0.402571	1.19065e-05	0.000212744	TRUE	FALSE
Tmem37	5.85609	5.59356	5.98384	3.57525	3.33856	3.79571	0.702013	1.18916e-05	0.000212744	TRUE	FALSE
Uck2	151.404	152.559	157.957	190.269	191.083	184.27	-0.292196	1.21334e-05	0.000216453	FALSE	TRUE
Tcf7l1	110.745	106.636	102.038	82.3335	90.512	83.1701	0.319308	1.21569e-05	0.000216527	TRUE	FALSE
Ntsr1	2.70922	2.86645	2.02241	5.07521	5.76065	3.71183	-0.935236	1.23413e-05	0.000219464	FALSE	TRUE
Tfrc	215.8	223.981	219.296	258.384	265.448	322.09	-0.360069	1.24273e-05	0.000220644	FALSE	TRUE
Arv1	11.4829	10.0326	9.40317	13.8695	15.5799	15.791	-0.548935	1.27406e-05	0.000225849	FALSE	TRUE
2410002F23Rik	68.7101	65.8089	59.7341	80.5047	92.1049	79.2905	-0.37477	1.29262e-05	0.000228777	FALSE	TRUE
Dok4	137.212	120.192	137.399	184.454	149.995	176.805	-0.373031	1.30263e-05	0.000230187	FALSE	TRUE
Map2	9.64901	9.57474	11.2796	14.8352	14.0743	15.2877	-0.535234	1.3617e-05	0.000240246	FALSE	TRUE
Sulf2	363.161	340.67	342.288	426.77	424.433	421.576	-0.282943	1.38546e-05	0.000244054	FALSE	TRUE
Nln	45.0356	46.4405	43.0336	55.5191	54.8352	57.6696	-0.320879	1.39075e-05	0.000244603	FALSE	TRUE
Bnc2	21.8405	22.5932	23.3307	13.4175	12.9396	18.9786	0.579619	1.40253e-05	0.000246288	TRUE	FALSE
Hspd1	647.546	620.766	643.794	835.129	766.079	753.144	-0.30018	1.43214e-05	0.000251094	FALSE	TRUE
Dcaf5	94.2185	91.6667	91.7591	71.6899	72.1172	80.0664	0.310511	1.45341e-05	0.000254427	TRUE	FALSE
Bysl	108.036	116.051	109.419	148.866	142.532	128.719	-0.33304	1.46374e-05	0.000255836	FALSE	TRUE
Cachd1	126.708	114.359	125.765	149.03	142.991	174.414	-0.346633	1.46715e-05	0.000256033	FALSE	TRUE
Ptpn7	11.4413	10.3909	12.343	8.52717	6.74257	5.74599	0.700636	1.47146e-05	0.000256386	TRUE	FALSE
Hspa9	754.311	752.583	757.779	911.586	867.283	998.545	-0.294446	1.48916e-05	0.000259068	FALSE	TRUE
Enox1	20.6526	20.5628	20.1616	14.9791	14.4671	16.0007	0.433328	1.52664e-05	0.000265177	TRUE	FALSE
Rrp8	75.9416	75.5031	73.891	93.2647	91.4503	91.7681	-0.295114	1.53237e-05	0.00026576	FALSE	TRUE
Npr3	11.0245	11.2866	11.0086	15.1434	15.2526	16.2314	-0.484653	1.54302e-05	0.000267194	FALSE	TRUE
Bop1	168.326	175.729	170.758	232.802	216.482	198.53	-0.331528	1.5577e-05	0.000269321	FALSE	TRUE
Aars	267.38	276.274	266.312	322.841	314.959	375.754	-0.323492	1.56277e-05	0.000269783	FALSE	TRUE
Stc2	6.12701	5.79262	5.3375	10.1093	8.881	67.1694	-2.31932	1.58117e-05	0.000272539	FALSE	TRUE
1110038B12Rik	59.853	58.5035	51.4568	66.1832	74.2338	78.2	-0.364317	1.63351e-05	0.000280712	FALSE	TRUE
Syde1	61.1243	65.5502	63.0075	81.6965	78.8161	75.7674	-0.316861	1.63359e-05	0.000280712	FALSE	TRUE
Ypel1	50.9751	51.8748	51.5611	38.362	44.1213	38.5443	0.35168	1.65688e-05	0.000284279	TRUE	FALSE
Cnr1	4.06384	4.00109	5.0873	7.17104	6.41526	8.19957	-0.728491	1.71564e-05	0.000293912	FALSE	TRUE
Eno3	115.955	120.351	117.967	94.1893	100.724	91.7471	0.305603	1.7283e-05	0.000295628	TRUE	FALSE
Zranb3	54.5596	51.3771	51.3317	39.9236	40.15	44.9194	0.33129	1.79701e-05	0.000306913	TRUE	FALSE
Usp36	97.3654	99.1115	98.9314	118.086	115.278	130.858	-0.302127	1.83012e-05	0.000312094	FALSE	TRUE
Gucy1a3	6.71054	5.51394	5.2541	3.30813	3.40402	3.79571	0.733486	1.86787e-05	0.000318047	TRUE	FALSE
Tfdp2	132.502	137.47	136.21	100.025	104.368	120.1	0.323951	1.87449e-05	0.000318691	TRUE	FALSE
Egfr	3.64703	3.32429	3.91973	6.39024	5.01874	6.92036	-0.75169	1.90313e-05	0.000323071	FALSE	TRUE
Sox5	22.9659	21.4188	21.8712	13.9311	14.2707	18.4962	0.504474	1.9294e-05	0.000327036	TRUE	FALSE
Nes	117.018	107.95	108.189	143.051	128.109	141.028	-0.3072	1.94017e-05	0.000328365	FALSE	TRUE
Cdhr1	6.62718	4.95657	7.7352	3.26704	3.44766	4.17318	0.826205	1.97237e-05	0.000333313	TRUE	FALSE
Bcar3	15.7969	17.358	17.5554	10.5203	13.2888	11.1145	0.538605	1.98392e-05	0.00033476	TRUE	FALSE
1500012F01Rik	45.765	44.4698	39.9062	51.6562	56.1881	75.0544	-0.490918	2.01191e-05	0.000338217	FALSE	TRUE
Fermt1	31.9688	28.9233	33.8598	24.2665	18.9185	25.0181	0.473732	2.01345e-05	0.000338217	TRUE	FALSE
Igsf3	127.771	116.629	125.911	83.2992	87.5662	110.474	0.396375	2.00937e-05	0.000338217	TRUE	FALSE
Ebf3	16.2137	16.0243	11.4881	20.4036	21.537	22.5226	-0.559607	2.04627e-05	0.000343216	FALSE	TRUE
Neurl1a	10.1909	9.53493	10.8418	6.51353	7.48448	6.01861	0.610939	2.04987e-05	0.000343307	TRUE	FALSE
Kifap3	118.789	117.485	116.695	94.7235	96.469	99.2337	0.281371	2.05473e-05	0.000343608	TRUE	FALSE
Neil3	24.5289	23.907	24.7693	16.2119	18.6785	19.4819	0.429223	2.06604e-05	0.000344985	TRUE	FALSE
Tbrg4	134.961	135.639	127.078	165.715	161.691	158.623	-0.289421	2.12681e-05	0.000354605	FALSE	TRUE
Tspan18	61.5828	61.9671	59.7967	45.6563	48.8782	52.385	0.319622	2.16153e-05	0.00035986	TRUE	FALSE
Cdk5rap1	15.8177	15.7058	17.3886	27.0609	22.7371	20.1319	-0.515925	2.16482e-05	0.000359873	FALSE	TRUE
Exph5	3.35527	3.44372	3.60698	1.91091	2.05114	2.05514	0.789767	2.21388e-05	0.000367484	TRUE	FALSE
Gnal	11.7122	12.063	12.3221	15.5338	16.8455	17.9929	-0.480532	2.22254e-05	0.000368377	FALSE	TRUE
Epha2	19.7773	18.9305	19.3693	27.5746	23.2171	26.9055	-0.420225	2.24119e-05	0.00037092	FALSE	TRUE
Zfyve1	43.0767	44.012	44.7224	34.5607	35.4585	35.9649	0.314648	2.24786e-05	0.000371477	TRUE	FALSE
Fgfr1	225.783	224.359	228.741	275.89	291.72	265.909	-0.296032	2.26877e-05	0.00037413	FALSE	TRUE
Olfml2a	6.6897	6.4097	6.17148	4.39714	3.84043	3.90056	0.666019	2.27059e-05	0.00037413	TRUE	FALSE
Rsl1d1	377.27	385.259	367.203	468.81	439.882	461.063	-0.277941	2.28285e-05	0.000375598	FALSE	TRUE
Adpgk	59.1028	59.9566	60.0052	69.1009	74.9757	76.4595	-0.300437	2.31794e-05	0.000380814	FALSE	TRUE
Nip7	123.645	128.771	127.308	160.126	155.908	147.991	-0.289236	2.35198e-05	0.000385841	FALSE	TRUE
Dcn	2.20906	3.24466	2.58535	1.6027	1.39652	0.838831	1.06576	2.36093e-05	0.000386744	TRUE	FALSE
Lrrc1	31.7396	33.0438	32.8381	25.7254	25.5956	25.3327	0.348852	2.39094e-05	0.000391089	TRUE	FALSE
Prmt2	33.511	35.4126	36.9872	27.4924	28.2359	22.1242	0.444115	2.39726e-05	0.000391552	TRUE	FALSE
Rhbdf2	8.04431	9.59465	7.46416	12.349	12.6996	12.4986	-0.580066	2.41063e-05	0.000393164	FALSE	TRUE
Rpl12	12.525	12.3019	11.1337	16.2735	16.54	17.196	-0.475585	2.45581e-05	0.000399951	FALSE	TRUE
Baz1a	86.0491	85.4959	84.6077	110.175	94.8979	119.156	-0.340105	2.4636e-05	0.000400639	FALSE	TRUE
Aldh18a1	144.422	142.407	135.356	169.537	170.572	240.577	-0.459883	2.48094e-05	0.000402875	FALSE	TRUE
Trp53i11	29.1137	28.9034	28.4806	22.4378	23.108	21.1176	0.375845	2.55978e-05	0.000415077	TRUE	FALSE
Gja1	307.101	307.009	327.047	400.572	357.793	397.753	-0.296814	2.56614e-05	0.000415507	FALSE	TRUE
Tshz1	156.197	143.741	151.431	180.345	178.405	192.05	-0.287272	2.58554e-05	0.000418045	FALSE	TRUE
Cxcl12	122.103	116.211	114.006	90.799	101.051	92.9844	0.306836	2.60202e-05	0.000420104	TRUE	FALSE
Pgbd5	2.18822	2.60767	2.5645	4.66426	4.3423	3.69086	-0.785715	2.61116e-05	0.000420975	FALSE	TRUE
Slc25a22	49.6622	50.0634	49.9765	66.6969	64.3709	57.6487	-0.334114	2.6579e-05	0.000427895	FALSE	TRUE
Sgms1	20.9861	20.9808	20.099	14.2394	15.7981	16.0846	0.428548	2.688e-05	0.000432122	TRUE	FALSE
Dnajc28	5.73105	5.91205	5.40005	3.82182	3.16399	3.56503	0.690802	2.72109e-05	0.000436815	TRUE	FALSE
Slc35f2	5.18921	6.17083	5.48345	7.99294	8.9901	9.10132	-0.63006	2.7732e-05	0.000444544	FALSE	TRUE
Herpud1	28.1551	29.9186	30.6489	38.6908	35.6767	56.3485	-0.559101	2.77772e-05	0.000444634	FALSE	TRUE
Yae1d1	27.3215	23.6482	23.5809	34.8073	28.9342	37.6635	-0.444143	2.78827e-05	0.000445686	FALSE	TRUE
Met	31.2811	29.5404	29.252	23.2391	21.777	24.5358	0.372746	2.79778e-05	0.00044657	TRUE	FALSE
Slc1a4	30.3642	30.7745	30.3987	41.6907	38.9935	81.3247	-0.823626	2.8715e-05	0.000457687	FALSE	TRUE
Cib2	7.31491	7.84293	8.17305	5.30123	4.7569	5.0959	0.621908	2.91805e-05	0.000464446	TRUE	FALSE
Rspo3	7.85675	8.95766	9.15298	5.09576	6.21888	5.20075	0.653428	2.95372e-05	0.000469457	TRUE	FALSE
Gtpbp4	194.418	194.919	188.043	234.261	224.534	242.275	-0.280049	2.96173e-05	0.000470065	FALSE	TRUE
Mme	16.4429	17.0395	17.2426	10.7257	12.6123	12.8761	0.486415	3.05587e-05	0.000484321	TRUE	FALSE
Myo19	33.6569	30.5755	29.6481	40.7866	42.6593	37.9361	-0.370596	3.08655e-05	0.000488493	FALSE	TRUE
Peak1	55.9767	49.5856	57.816	32.3416	28.9778	47.9392	0.580263	3.09459e-05	0.000489077	TRUE	FALSE
6030419C18Rik	12.6708	12.9587	12.76	9.22579	9.27377	7.52851	0.560671	3.09979e-05	0.000489208	TRUE	FALSE
Cux1	133.19	124.75	134.814	103.641	100.702	114.899	0.29888	3.10887e-05	0.000489953	TRUE	FALSE
Eif4ebp1	98.8658	105.183	100.829	120.839	121.999	165.438	-0.421308	3.12663e-05	0.00049206	FALSE	TRUE
Gmfb	184.123	182.378	178.494	226.761	209.194	226.505	-0.281624	3.16964e-05	0.000498131	FALSE	TRUE
Dag1	259.377	242.394	257.618	214.104	195.033	211.847	0.290217	3.21559e-05	0.000503626	TRUE	FALSE
Igf2os	59.8113	55.9157	56.7318	72.2241	76.9395	66.8758	-0.324991	3.22256e-05	0.000503626	FALSE	TRUE
Ikzf2	13.0668	12.7398	12.5932	7.43816	6.85168	10.2967	0.642725	3.21919e-05	0.000503626	TRUE	FALSE
Lrba	19.9024	23.7876	22.5801	14.9791	15.0126	17.8671	0.469606	3.21493e-05	0.000503626	TRUE	FALSE
Plcb1	3.66787	4.16033	3.89888	6.20532	6.00067	6.24929	-0.653555	3.28598e-05	0.000512823	FALSE	TRUE
Itih5	23.6953	21.4586	21.9129	14.7941	16.8892	17.8252	0.437989	3.2971e-05	0.000513844	TRUE	FALSE
Pcx	58.2066	55.3981	55.7519	40.1085	38.557	50.4976	0.390722	3.33016e-05	0.000518277	TRUE	FALSE
Npm3	49.558	51.9544	51.3317	63.8408	63.8035	60.6685	-0.300997	3.33888e-05	0.000518913	FALSE	TRUE
Eps8l2	5.83525	7.00688	7.88115	4.31496	4.58233	3.586	0.73128	3.60673e-05	0.000559767	TRUE	FALSE
Parp4	6.8981	7.28556	6.29658	4.02729	3.88407	4.92813	0.673269	3.64946e-05	0.000565617	TRUE	FALSE
Hspbap1	30.9268	32.4665	32.9841	41.0743	40.5864	39.488	-0.329963	3.75971e-05	0.000581899	FALSE	TRUE
Ipo4	205.297	200.592	199.656	256.226	247.991	234.495	-0.286788	3.77208e-05	0.00058301	FALSE	TRUE
Ppl	13.1293	12.899	14.4071	9.80111	7.81178	9.94015	0.552552	3.78236e-05	0.000583188	TRUE	FALSE
Ptpn13	178.392	154.131	171.634	123.88	116.326	149.899	0.369922	3.78845e-05	0.000583188	TRUE	FALSE
Rrp1b	159.282	151.902	153.015	187.187	183.664	188.926	-0.270134	3.78882e-05	0.000583188	FALSE	TRUE
Pitx2	29.0512	26.1763	30.1068	22.7665	16.6273	21.7048	0.481316	3.79672e-05	0.000583602	TRUE	FALSE
Ddx27	146.277	148.199	144.738	176.893	175.591	176.49	-0.268256	3.82031e-05	0.000586426	FALSE	TRUE
Spock3	2.52166	2.11003	3.04404	1.13011	1.70201	1.06951	0.976578	3.82627e-05	0.000586538	TRUE	FALSE
Ier2	94.7812	102.555	98.2642	113.627	121.628	127.712	-0.296101	3.88329e-05	0.000594466	FALSE	TRUE
Hapln1	199.191	176.904	198.634	149.462	133.935	168.521	0.346722	3.98113e-05	0.000608613	TRUE	FALSE
Homer2	16.4637	16.6612	18.3268	23.6501	21.5806	23.1308	-0.410195	3.99085e-05	0.00060927	FALSE	TRUE
Adcyap1r1	2.66754	1.91097	2.18921	4.25331	3.20763	4.82328	-0.861042	3.99942e-05	0.000609749	FALSE	TRUE
Cntln	34.5113	33.8599	31.1493	24.3898	24.4609	28.0799	0.371398	4.01916e-05	0.000611927	TRUE	FALSE
Ypel3	13.171	13.8545	13.3646	9.36962	9.18648	10.1079	0.49463	4.0343e-05	0.000613399	TRUE	FALSE
Jmjd6	100.387	106.576	104.686	122.319	123.068	133.311	-0.281095	4.06472e-05	0.000617188	FALSE	TRUE
Megf8	168.41	153.534	166.755	132.551	131.753	138.386	0.279211	4.08671e-05	0.000619688	TRUE	FALSE
Mtbp	59.1236	60.3348	57.7743	70.2105	69.1496	80.9053	-0.313595	4.13567e-05	0.000626266	FALSE	TRUE
Wbscr16	54.5804	58.8021	55.043	68.69	69.7169	67.9034	-0.292566	4.16277e-05	0.000629521	FALSE	TRUE
Mettl13	55.7267	56.5129	53.5001	66.0599	69.6078	66.9177	-0.289477	4.21462e-05	0.000636504	FALSE	TRUE
Nop14	112.579	116.529	111.837	134.586	131.513	151.619	-0.292984	4.29362e-05	0.000647563	FALSE	TRUE
Tubb3	1.7089	2.66739	1.56372	3.92455	3.44766	3.7328	-0.899983	4.31589e-05	0.000650048	FALSE	TRUE
Hand2	116.017	109.642	116.612	94.3948	92.8468	95.7735	0.274183	4.37696e-05	0.000658363	TRUE	FALSE
Arhgap10	75.0664	81.0768	77.3729	94.5386	93.8942	95.8574	-0.283775	4.45042e-05	0.000668516	FALSE	TRUE
Nxph4	0.0833607	0.119435	0.166797	0.143832	0.196386	4.86522	-3.78846	4.5065e-05	0.000676036	FALSE	TRUE
Erbb3	11.7747	12.9189	13.4063	7.95185	8.92464	9.45782	0.532998	4.57351e-05	0.000685171	TRUE	FALSE
Wrn	32.5107	31.9888	32.3586	22.8693	23.239	27.996	0.386206	4.61552e-05	0.000690544	TRUE	FALSE
Mturn	5.58517	5.83243	6.25488	3.26704	4.21138	3.46018	0.692705	4.82625e-05	0.00072111	TRUE	FALSE
Vars	531.279	507.78	508.501	622.175	603.1	627.341	-0.259579	4.86866e-05	0.000726479	FALSE	FALSE
Slc39a14	26.8422	27.6891	30.503	36.9237	35.3712	36.0488	-0.349609	4.89294e-05	0.000729132	FALSE	TRUE
Cirh1a	144.673	150.548	140.902	174.673	172.121	179.468	-0.271022	4.9633e-05	0.000738636	FALSE	TRUE
Mrc2	192.751	167.548	177.243	134.257	139.827	157.26	0.317501	5.03171e-05	0.000747825	TRUE	FALSE
Slc12a6	30.0515	30.5357	34.7563	22.7665	25.0937	25.3956	0.380223	5.21833e-05	0.000774535	TRUE	FALSE
Tle2	3.77207	3.26457	3.02319	5.36287	5.91339	5.05396	-0.698313	5.22965e-05	0.000775191	FALSE	TRUE
Dync2li1	27.8633	28.7043	27.4381	21.657	21.4933	22.6694	0.351962	5.24987e-05	0.000776137	TRUE	FALSE
Ifitm2	184.269	178.695	185.541	151.393	155.472	147.592	0.271359	5.24441e-05	0.000776137	TRUE	FALSE
Rnase4	5.56433	8.36048	7.79775	4.35605	4.14592	4.55066	0.734752	5.26195e-05	0.000776899	TRUE	FALSE
Npm1	1344.25	1354.16	1355.54	1662.61	1584.07	1597.43	-0.256905	5.33035e-05	0.000785964	FALSE	FALSE
St6gal2	9.56565	7.98227	13.2604	6.08203	5.6079	6.68968	0.744328	5.33849e-05	0.000786131	TRUE	FALSE
Six4	51.0168	46.54	46.0359	36.862	36.4841	41.2076	0.325822	5.35351e-05	0.00078731	TRUE	FALSE
Nmd3	92.5929	94.8118	87.9645	114.367	107.336	113.137	-0.282103	5.36433e-05	0.000787869	FALSE	TRUE
Mybbp1a	770.045	744.501	742.872	916.209	855.019	937.31	-0.262851	5.52062e-05	0.000809764	FALSE	FALSE
Dnpep	120.769	127.557	128.913	104.977	106.376	93.6765	0.306568	5.56827e-05	0.000815686	TRUE	FALSE
Trpm1	1.64637	2.05031	1.48032	3.67799	3.31674	2.57941	-0.884839	5.59226e-05	0.000818132	FALSE	TRUE
Kcne3	14.6715	12.0033	13.5522	9.59564	8.18274	9.87724	0.539742	5.61995e-05	0.000821113	TRUE	FALSE
Mphosph10	106.202	110.896	107.542	134.853	126.516	130.229	-0.270539	5.66651e-05	0.000826838	FALSE	TRUE
Wdtc1	80.068	83.5451	87.2765	67.2311	71.4626	60.0393	0.336295	5.69869e-05	0.000830454	TRUE	FALSE
Ahcy	52.3922	53.6066	54.2715	66.8202	67.5567	62.2203	-0.29468	5.70685e-05	0.000830565	FALSE	TRUE
Dab1	6.12701	5.61347	7.42246	4.35605	3.79679	3.71183	0.690435	5.82241e-05	0.000845154	TRUE	FALSE
Gpr4	4.564	4.10062	5.0873	7.5409	7.17899	6.71065	-0.640372	5.82461e-05	0.000845154	FALSE	TRUE
Ppid	149.028	154.43	151.535	192.242	187.156	174.624	-0.28408	5.83722e-05	0.000845154	FALSE	TRUE
Scn4b	20.7777	20.304	25.3114	36.9237	31.5744	26.3603	-0.514929	5.83113e-05	0.000845154	FALSE	TRUE
Eef1e1	53.1633	58.2646	56.1271	68.1352	65.6801	71.2377	-0.291318	5.92078e-05	0.000853948	FALSE	TRUE
Trim66	0.187562	0.179153	0.0416992	0.267116	0.283668	3.16659	-3.16004	5.9204e-05	0.000853948	FALSE	TRUE
Tubb4b	275.361	286.725	271.399	234.035	232.368	197.419	0.328377	5.92051e-05	0.000853948	TRUE	FALSE
G0s2	2.56334	2.76692	2.39771	3.5547	4.3423	7.57045	-1.00007	5.96484e-05	0.000859198	FALSE	TRUE
Nckap5	3.23023	2.86645	3.29424	1.89036	1.85475	1.69863	0.785309	5.97551e-05	0.000859631	TRUE	FALSE
Elac2	75.4415	80.181	71.7435	95.3194	93.7414	90.5518	-0.298323	6.04991e-05	0.00086902	FALSE	TRUE
Mpp6	109.974	108.786	105.52	136.168	125.163	130.459	-0.272889	6.05627e-05	0.00086902	FALSE	TRUE
Hspe1	154.676	156.6	158.123	205.638	189.272	180.16	-0.292946	6.10037e-05	0.000874231	FALSE	TRUE
Amotl1	330.15	312.085	335.074	256.267	255.912	287.908	0.288631	6.12665e-05	0.00087576	TRUE	FALSE
D3Ertd751e	12.0039	11.5056	10.675	8.26006	7.5063	8.11569	0.516999	6.12068e-05	0.00087576	TRUE	FALSE
Susd5	3.31359	2.32899	3.87803	1.41777	1.15649	2.11805	1.01751	6.1421e-05	0.000876851	TRUE	FALSE
Ifi30	13.4628	13.4763	14.8866	18.657	18.5694	18.5801	-0.416125	6.16955e-05	0.000879371	FALSE	TRUE
Rsad2	5.46013	5.01629	6.67187	3.47251	3.88407	2.81008	0.753962	6.17542e-05	0.000879371	TRUE	FALSE
Wdr81	27.7383	25.3999	23.7686	19.2118	20.3586	18.685	0.400804	6.18982e-05	0.000880303	TRUE	FALSE
Ccng1	53.2884	58.4437	56.982	45.3687	47.2417	42.8014	0.317369	6.2027e-05	0.000881018	TRUE	FALSE
Rassf10	2.04234	1.692	2.08496	3.51361	2.66212	4.69745	-0.902563	6.23524e-05	0.000884521	FALSE	TRUE
Pvrl4	3.75123	5.3945	5.3375	2.81499	2.59665	3.04076	0.776431	6.32345e-05	0.000895902	TRUE	FALSE
Ccnjl	88.55	87.6457	90.6541	76.1692	70.917	72.6637	0.280053	6.34875e-05	0.000898352	TRUE	FALSE
Lrrc56	17.7767	18.6916	17.2426	13.2531	13.8561	12.3518	0.445011	6.38297e-05	0.000902056	TRUE	FALSE
Plxna2	131.814	119.216	103.706	77.0322	65.2655	104.015	0.526176	6.39623e-05	0.000902794	TRUE	FALSE
Abhd4	49.037	49.506	49.9765	40.1702	41.9174	37.8523	0.308431	6.43825e-05	0.000907583	TRUE	FALSE
Frk	7.16902	8.02208	9.00703	4.52043	5.65154	5.28464	0.647032	6.45935e-05	0.000909414	TRUE	FALSE
Brinp1	4.16804	4.00109	4.83711	2.54788	2.6403	2.78911	0.704386	6.57463e-05	0.000924485	TRUE	FALSE
Mxd4	14.4422	16.6612	16.638	9.94494	12.8742	9.29005	0.572834	6.75254e-05	0.000948314	TRUE	FALSE
Ebna1bp2	157.281	161.676	160.459	197.83	196.277	184.983	-0.272496	6.97832e-05	0.000977798	FALSE	TRUE
Slc45a4	28.9679	31.0532	30.0234	39.6976	42.3538	34.7695	-0.375351	6.97991e-05	0.000977798	FALSE	TRUE
Fzd8	14.1296	16.0442	14.8032	11.1778	10.6921	10.6951	0.465881	7.01585e-05	0.000981606	TRUE	FALSE
Pik3cd	7.54415	6.62867	6.40083	4.62317	4.29866	4.42483	0.623629	7.06911e-05	0.000987827	TRUE	FALSE
Slc7a6	129.459	126.9	127.996	153.51	149.275	155.582	-0.254092	7.08136e-05	0.000987896	FALSE	FALSE
Utp18	84.6945	90.6913	82.2726	107.668	103.692	102.337	-0.283851	7.08721e-05	0.000987896	FALSE	TRUE
Inpp4b	2.68838	3.30438	2.6062	1.37668	1.52744	1.88737	0.843667	7.20102e-05	0.00100251	TRUE	FALSE
Wdr12	71.2318	76.1003	73.8285	88.5388	90.0756	89.3775	-0.277014	7.26209e-05	0.00100976	FALSE	TRUE
Znf512b	51.5378	48.1723	45.4938	56.978	67.5348	59.4941	-0.341499	7.36538e-05	0.00102286	FALSE	TRUE
Meis2	379.291	358.963	338.764	286.595	299.335	303.699	0.275776	7.40553e-05	0.00102576	TRUE	FALSE
Phgdh	73.3783	77.5136	70.2215	91.4771	87.8935	90.2582	-0.286132	7.41153e-05	0.00102576	FALSE	TRUE
Wnt7b	24.2371	21.4785	20.8079	17.0543	15.9072	17.1331	0.408886	7.41369e-05	0.00102576	TRUE	FALSE
Bahd1	38.8669	37.8809	44.4514	32.9991	30.1561	31.8336	0.351244	7.42758e-05	0.00102642	TRUE	FALSE
Nomo1	129.647	126.701	127.454	153.119	144.671	166.298	-0.274089	7.59175e-05	0.00104781	FALSE	TRUE
Twist1	295.472	289.83	297.649	351.258	334.641	376.321	-0.2667	7.61582e-05	0.00104984	FALSE	TRUE
Pcsk5	27.9467	27.3706	25.5616	20.5474	19.093	22.5226	0.379489	7.67816e-05	0.00105714	TRUE	FALSE
Atxn2l	214.967	195.934	198.905	230.706	246.377	281.784	-0.315505	7.87317e-05	0.00108266	FALSE	TRUE
Slc9a8	32.9483	30.9338	29.3146	37.8689	38.4916	40.6623	-0.328422	7.90978e-05	0.00108636	FALSE	TRUE
Bcap29	18.7562	19.1296	18.0141	24.287	22.5625	26.1506	-0.385093	7.93206e-05	0.00108809	FALSE	TRUE
Ldhb	111.933	116.131	124.493	88.2922	103.823	78.242	0.383082	7.98612e-05	0.00109417	TRUE	FALSE
Slc29a2	19.1521	17.7561	17.8264	24.2459	25.6174	22.3339	-0.399386	8.00642e-05	0.00109561	FALSE	TRUE
Lgr4	54.8931	55.6967	56.3148	45.5947	46.2379	45.213	0.284386	8.04644e-05	0.00109975	TRUE	FALSE
Asic2	12.3582	13.0583	10.3414	6.22586	9.33923	7.04618	0.662077	8.07183e-05	0.00110187	TRUE	FALSE
Gdf11	33.5944	34.6761	36.1741	26.0336	29.6542	25.857	0.357313	8.28821e-05	0.00113004	TRUE	FALSE
Prdm16	15.5676	18.7116	14.8241	21.2255	25.6829	21.6209	-0.480201	8.36247e-05	0.00113878	FALSE	TRUE
Pgpep1	37.5749	38.8364	39.0722	28.7869	32.9491	29.6317	0.338194	8.4648e-05	0.00115132	TRUE	FALSE
Arhgdig	2.91763	2.72711	2.6062	4.19167	4.3423	4.65551	-0.676254	8.51033e-05	0.00115611	FALSE	TRUE
Wdr55	75.3998	78.0511	79.0617	98.0317	99.0875	88.4128	-0.296297	8.52602e-05	0.00115684	FALSE	TRUE
Adsl	149.487	156.859	152.348	187.125	187.156	177.958	-0.26773	8.74661e-05	0.00118391	FALSE	TRUE
Stat5b	43.6602	44.7684	45.1811	33.9238	35.0003	38.9427	0.30877	8.73797e-05	0.00118391	TRUE	FALSE
Aen	57.6648	62.5643	59.0461	79.4157	74.081	68.8471	-0.310571	8.75783e-05	0.001184	FALSE	TRUE
Fam184b	2.06318	1.95078	1.95986	3.26704	2.81486	4.69745	-0.85145	8.83576e-05	0.00119309	FALSE	TRUE
Igdcc3	921.011	912.347	933.52	1151.29	1166.4	1036.48	-0.277695	9.01043e-05	0.00121522	FALSE	TRUE
Tspan9	158.01	151.763	153.328	131.236	127.476	130.019	0.252509	9.07402e-05	0.00122232	FALSE	FALSE
Pitx1	343.634	320.565	324.149	279.712	271.165	275.808	0.257656	9.08632e-05	0.00122251	FALSE	FALSE
Dpep1	19.298	19.05	16.7839	11.5887	14.4889	13.5471	0.476941	9.28829e-05	0.0012468	TRUE	FALSE
Tinagl1	19.0688	20.2443	17.4303	13.8284	12.4378	15.3087	0.448544	9.29607e-05	0.0012468	TRUE	FALSE
Wdr86	57.3105	58.6627	55.3766	47.1974	47.4599	45.7163	0.287737	9.30017e-05	0.0012468	TRUE	FALSE
Ydjc	6.81474	6.44951	6.04639	9.24633	9.29559	9.62559	-0.544447	9.44533e-05	0.00126475	FALSE	TRUE
Fbxl7	14.3589	15.1882	14.7824	18.5749	19.5731	20.3207	-0.399146	9.46557e-05	0.00126595	FALSE	TRUE
Cry1	44.5772	43.4148	40.5733	52.0877	53.3951	52.1963	-0.2944	9.49098e-05	0.00126784	FALSE	TRUE
Mri1	28.8637	30.7546	30.8157	38.7319	41.1101	35.3148	-0.348458	9.54831e-05	0.00127398	FALSE	TRUE
Ptges	21.6113	20.2244	21.7878	15.6571	15.1653	17.4267	0.398721	9.57214e-05	0.00127564	TRUE	FALSE
Cd3eap	51.4544	50.8397	53.6669	64.601	63.258	61.4234	-0.279411	9.58699e-05	0.0012761	FALSE	TRUE
Arhgap8	4.43896	3.98118	4.37842	2.95883	2.31299	2.57941	0.702972	9.64526e-05	0.00128234	TRUE	FALSE
Acpp	7.37743	5.83243	7.65181	11.712	8.75007	11.7646	-0.628247	9.70447e-05	0.00128869	FALSE	TRUE
Cdh5	186.436	182.856	185.124	154.229	149.144	160.783	0.256318	9.77076e-05	0.00129595	FALSE	FALSE
She	43.4726	42.3797	42.4081	31.8896	30.7671	38.2297	0.34618	9.85481e-05	0.00130556	TRUE	FALSE
Arhgap9	2.1257	2.74702	2.16836	3.76018	3.97135	3.94251	-0.727408	9.9317e-05	0.00131419	FALSE	TRUE
Trub2	69.4187	71.8404	66.7813	84.8197	84.0312	82.9604	-0.275411	0.000100001	0.00132169	FALSE	TRUE
Nav2	37.5749	35.8704	37.9254	28.602	27.123	32.274	0.339551	0.000101161	0.00133545	TRUE	FALSE
Tars	192.376	195.357	195.548	228.343	222.069	257.269	-0.278923	0.00010168	0.00134071	FALSE	TRUE
Cand2	227.366	215.561	209.268	182.708	181.177	179.3	0.26385	0.000102232	0.00134326	TRUE	FALSE
Itga6	119.206	114.578	121.136	97.8673	79.3834	103.134	0.339919	0.000102157	0.00134326	TRUE	FALSE
Poc1b	90.238	85.6949	90.6333	111.572	104.543	104.917	-0.268318	0.000102225	0.00134326	FALSE	TRUE
Ephb6	16.6305	15.3076	18.3894	10.7257	12.9833	12.3308	0.481848	0.000104216	0.00136773	TRUE	FALSE
Ddx18	75.0455	79.325	77.1227	95.8536	91.4721	92.0617	-0.271283	0.000104825	0.00137412	FALSE	TRUE
Tprkb	44.4938	44.0319	42.8251	52.1288	54.0279	53.6013	-0.282381	0.000104948	0.00137412	FALSE	TRUE
Dhps	42.4723	41.1057	40.2606	50.2384	50.3184	50.1202	-0.282989	0.000105126	0.00137485	FALSE	TRUE
Btbd19	4.06384	5.3945	4.35757	7.47926	6.80804	7.23492	-0.638591	0.000107169	0.00139993	FALSE	TRUE
9130401M01Rik	50.3082	55.0199	51.7487	66.0599	64.3272	61.6751	-0.29	0.000108612	0.00141713	FALSE	TRUE
Tns1	229.2	201.408	232.994	162.879	148.686	200.418	0.374155	0.000109757	0.00143041	TRUE	FALSE
Tgfb2	75.7541	72.7163	51.8113	25.7254	38.4916	53.9788	0.760892	0.000111853	0.00145603	TRUE	FALSE
Nhp2	149.82	158.013	147.49	191.954	191.563	172.296	-0.287664	0.000112893	0.00146448	FALSE	TRUE
Rpl35a	64.6879	67.282	68.5744	86.7717	92.694	74.5092	-0.340674	0.000112696	0.00146448	FALSE	TRUE
Rps12	4.58484	4.41911	4.39927	6.43134	7.33173	6.52191	-0.597207	0.000112846	0.00146448	FALSE	TRUE
Tmem200b	25.7376	24.5241	25.4782	19.6228	20.7296	17.5106	0.388484	0.000113221	0.00146703	TRUE	FALSE
Gpatch4	67.6056	69.0934	71.2848	86.3402	83.813	81.3247	-0.273978	0.000115288	0.00149209	FALSE	TRUE
Fam83h	14.2755	16.5418	14.9075	11.6709	10.6703	10.8629	0.461556	0.000117918	0.00152263	TRUE	FALSE
S100a10	45.4733	40.9664	42.8668	35.1977	35.2185	34.5598	0.300603	0.000117808	0.00152263	TRUE	FALSE
Fam204a	24.7581	24.0463	24.123	29.9992	28.7814	34.7486	-0.359074	0.000118238	0.00152491	FALSE	TRUE
Hax1	24.1538	23.688	23.5601	28.8075	29.0214	32.6305	-0.341328	0.000118367	0.00152491	FALSE	TRUE
Ier3	1.16705	1.17445	1.60542	1.80817	2.02932	15.6232	-2.29974	0.000119127	0.00153294	FALSE	TRUE
Polr1b	111.224	110.04	106.354	132.695	122.806	138.868	-0.267585	0.000119943	0.00154168	FALSE	TRUE
Rhoq	70.9192	68.4763	74.3289	58.6628	60.8359	56.4324	0.280731	0.000120598	0.00154832	TRUE	FALSE
Magel2	10.7952	10.6098	13.3021	5.73273	9.33923	5.80891	0.733653	0.000121394	0.00155675	TRUE	FALSE
Pus7	101.096	105.362	102.705	121.949	119.119	128.97	-0.259299	0.00012377	0.00158361	FALSE	FALSE
Tmod1	3.25107	4.61817	3.58613	1.89036	2.02932	2.64232	0.803911	0.000123677	0.00158361	TRUE	FALSE
Pak1ip1	68.0015	75.2443	72.4315	90.5113	84.5768	87.2804	-0.282696	0.00012475	0.00159432	FALSE	TRUE
Dlx5	3.58451	5.11582	4.79541	8.91757	5.62972	8.72384	-0.785877	0.000126311	0.00161245	FALSE	TRUE
Tmem200c	1.31293	1.63228	1.66797	2.50678	2.42209	3.14562	-0.806388	0.00012664	0.00161481	FALSE	TRUE
Dlx2	11.8789	11.6848	14.4488	20.5063	15.3399	18.622	-0.519445	0.00012862	0.00163819	FALSE	TRUE
Atad3a	124.687	128.891	123.43	148.887	152.875	147.508	-0.252937	0.000130497	0.00166021	FALSE	FALSE
Utp15	100.054	100.525	99.5569	122.319	115.737	120.121	-0.255088	0.000131076	0.00166569	FALSE	FALSE
Sec61a2	56.5394	54.6019	56.5441	65.2791	68.2549	67.8195	-0.263961	0.000131586	0.00167028	FALSE	TRUE
Mir17hg	28.1551	19.468	20.099	31.7868	37.9024	28.8138	-0.54053	0.000133143	0.00168813	FALSE	TRUE
Aff3	50.6833	55.5375	47.4537	60.2039	64.8073	64.9884	-0.305877	0.000134357	0.00169777	FALSE	TRUE
Clip3	136.357	131.877	131.269	104.114	119.424	101.981	0.295557	0.000134297	0.00169777	TRUE	FALSE
Olfml3	24.0496	19.9258	26.3331	17.116	18.1111	12.4357	0.560734	0.000134117	0.00169777	TRUE	FALSE
Ccng2	39.7006	38.299	39.6977	23.9994	27.1449	35.4616	0.442517	0.000134601	0.00169895	TRUE	FALSE
Rpl3	82.4438	90.9302	71.4516	117.86	117.875	91.7052	-0.419375	0.000135622	0.0017099	FALSE	TRUE
Cyb5r4	41.2636	41.3048	42.1162	53.7931	51.6494	47.8343	-0.297885	0.000139308	0.0017544	FALSE	TRUE
Camk1g	10.7327	10.7492	11.6341	6.719	8.40094	7.94792	0.522004	0.000141126	0.00177441	TRUE	FALSE
Parl	63.6251	63.5397	62.6531	79.8678	77.1577	73.0202	-0.277307	0.000141212	0.00177441	FALSE	TRUE
Ech1	37.8249	42.7778	38.6969	32.0129	32.7964	29.5688	0.33827	0.000143297	0.00179657	TRUE	FALSE
Ruvbl2	287.72	289.352	288.538	344.21	347.253	335.553	-0.246664	0.000143148	0.00179657	FALSE	FALSE
Tomm40	163.345	169.797	161.918	210.138	202.714	187.038	-0.277074	0.000145298	0.00181963	FALSE	TRUE
Pkn1	66.9595	76.0804	66.6562	88.8264	95.4652	80.2342	-0.33493	0.000146025	0.00182669	FALSE	TRUE
Dennd1a	52.8716	53.3876	53.2499	62.8751	62.1233	66.8548	-0.266379	0.000146246	0.00182742	FALSE	TRUE
Lypd6	21.0903	20.9609	19.5152	14.9585	15.7763	16.4201	0.384842	0.000146626	0.00183014	TRUE	FALSE
2410016O06Rik	48.9119	49.5856	48.6004	60.7176	60.094	57.3341	-0.276238	0.000147347	0.00183709	FALSE	TRUE
Taf5l	81.11	86.6504	80.2918	99.6549	97.1891	100.618	-0.262003	0.000147581	0.00183797	FALSE	FALSE
Bdh2	4.64736	4.99638	5.81704	3.51361	2.88032	3.33435	0.66697	0.000150196	0.00186845	TRUE	FALSE
Foxf1	15.0675	21.2794	18.7021	12.349	14.1398	10.2337	0.584473	0.000151114	0.00187779	TRUE	FALSE
Usp29	16.1095	15.5067	15.6998	19.6844	20.3368	21.3063	-0.374183	0.000151463	0.00188005	FALSE	TRUE
Dtna	3.64703	4.73761	3.23169	2.17803	2.42209	2.24387	0.764021	0.000152036	0.00188508	TRUE	FALSE
Uaca	98.199	94.5929	101.1	75.7172	76.3722	88.6015	0.288031	0.000154103	0.00190649	TRUE	FALSE
Wwc2	98.5324	91.9852	93.8441	76.8473	69.3896	84.7219	0.299937	0.000153975	0.00190649	TRUE	FALSE
Adamts3	10.3367	9.21644	9.46572	14.1366	11.7831	15.3506	-0.508531	0.000155811	0.00192127	FALSE	TRUE
Arhgef16	12.1498	13.1976	11.6758	8.67101	9.25195	8.53511	0.485043	0.000155604	0.00192127	TRUE	FALSE
Insig1	63.5417	56.7716	67.0523	86.2786	87.5225	69.3294	-0.375919	0.000155672	0.00192127	FALSE	TRUE
Tbc1d2b	48.9119	50.1828	50.4561	42.677	40.4554	39.7816	0.282903	0.000156599	0.00192886	TRUE	FALSE
Zfp692	22.4866	19.249	20.0782	25.2939	27.6686	26.9474	-0.370465	0.000158789	0.00195369	FALSE	TRUE
Gnpnat1	16.9639	17.0395	17.3052	21.472	21.4715	22.942	-0.360762	0.00016076	0.00197401	FALSE	TRUE
Mat2a	301.516	299.982	277.112	377.908	367.939	329.031	-0.290868	0.000160791	0.00197401	FALSE	TRUE
Slc6a15	2.0215	2.09012	2.6896	3.78072	3.09853	5.51531	-0.866082	0.000161785	0.00198403	FALSE	TRUE
Alg3	31.4478	31.2921	31.0451	42.2044	41.5683	35.4406	-0.346062	0.000163342	0.00200094	FALSE	TRUE
Bmi1	66.1468	63.0221	63.2994	51.6151	54.1806	54.3353	0.265388	0.000166319	0.00203519	TRUE	FALSE
Lgalsl	37.4707	40.7474	40.6359	48.7384	46.6961	49.512	-0.286316	0.000169813	0.00207342	FALSE	TRUE
Vegfa	67.5014	55.3981	60.7975	71.2995	81.7401	144.027	-0.693471	0.000169678	0.00207342	FALSE	TRUE
Twist2	36.5954	39.2345	31.8999	47.1563	44.9287	43.9967	-0.336878	0.000171084	0.00208667	FALSE	TRUE
Ppm1h	4.564	5.23525	4.37842	2.89718	3.20763	2.89397	0.656367	0.000171426	0.00208857	TRUE	FALSE
Gdf6	7.1065	9.05719	8.42324	5.79437	5.28059	5.28464	0.587608	0.00017263	0.00210096	TRUE	FALSE
Rgmb	14.9216	13.7152	14.553	10.4792	10.7794	10.7999	0.429802	0.000175619	0.00213445	TRUE	FALSE
Slc25a13	112.495	113.046	110.399	141.715	126.32	134.716	-0.261746	0.000175762	0.00213445	FALSE	FALSE
Sik1	52.8924	50.3619	49.0383	61.4778	64.4145	59.3054	-0.282149	0.000176434	0.00214029	FALSE	TRUE
Apoe	21.3404	23.5487	21.7878	16.3352	18.1766	16.6089	0.383666	0.000178109	0.00215777	TRUE	FALSE
Cep170b	45.244	48.5704	52.0615	41.0537	38.4479	38.7121	0.303224	0.00017826	0.00215777	TRUE	FALSE
D19Bwg1357e	205.859	210.465	212.478	255.137	241.576	250.58	-0.249083	0.000179505	0.0021705	FALSE	FALSE
Serpinf1	123.52	120.013	125.035	142.804	138.976	164.558	-0.276255	0.000180064	0.00217258	FALSE	TRUE
Zfp316	27.1339	27.7488	27.1253	20.1981	21.7552	22.8791	0.339183	0.000180029	0.00217258	TRUE	FALSE
Apaf1	73.5659	71.3229	74.7041	59.5053	58.0429	64.9255	0.267025	0.000182043	0.00219054	TRUE	FALSE
Fam69b	17.5058	19.6272	18.6396	23.8966	25.3337	23.0259	-0.373203	0.000181874	0.00219054	FALSE	TRUE
Glcci1	22.4449	24.6833	22.2674	27.7801	28.4977	32.7144	-0.35862	0.000182334	0.00219054	FALSE	TRUE
Sox6	54.6221	54.9204	51.3734	37.725	32.6	49.1136	0.429869	0.0001823	0.00219054	TRUE	FALSE
Fli1	41.8054	46.0424	42.4081	31.9718	36.855	35.7761	0.316747	0.000189893	0.00227855	TRUE	FALSE
Lmo3	5.14753	5.13572	4.60776	3.61634	3.01125	2.76814	0.66344	0.000190065	0.00227855	TRUE	FALSE
Dact3	93.239	88.2031	89.695	71.4844	78.2924	75.4948	0.267413	0.000190816	0.00228511	TRUE	FALSE
Atp2a2	418.867	388.683	428.772	510.398	469.951	495.477	-0.2555	0.000192101	0.00229805	FALSE	FALSE
Flt4	95.4897	82.1318	86.4216	60.9231	57.5628	81.0311	0.404141	0.000192452	0.00229979	TRUE	FALSE
Npr1	22.1948	21.797	19.6403	15.0202	17.5438	15.3926	0.408412	0.000194823	0.00232564	TRUE	FALSE
Anxa6	78.8176	87.4467	84.7537	70.8475	67.9276	69.0777	0.272235	0.000196418	0.0023422	TRUE	FALSE
Pdk2	7.27323	8.28086	7.75605	5.46561	5.36787	5.01202	0.5569	0.000200912	0.00239324	TRUE	FALSE
Pabpc4	81.631	82.4503	75.8717	97.6207	91.6685	99.4015	-0.26678	0.000201182	0.00239392	FALSE	TRUE
Itgav	50.079	43.1759	47.1618	57.656	52.9587	66.3515	-0.33398	0.00020218	0.00240325	FALSE	TRUE
Slc4a7	66.0426	60.7329	63.3203	76.1487	72.4227	104.959	-0.415499	0.000205031	0.00243455	FALSE	TRUE
Slc20a2	87.5288	80.1611	85.9421	104.155	102.862	97.7658	-0.265114	0.000205282	0.00243496	FALSE	TRUE
Ptprd	47.1405	44.5295	42.3456	31.6841	33.6256	40.2639	0.344135	0.000207536	0.00245909	TRUE	FALSE
Synpo2	10.2534	12.0431	12.2596	8.65046	7.24445	8.3254	0.512218	0.000208659	0.0024698	TRUE	FALSE
Plau	13.046	12.7796	12.4472	10.1093	9.03374	7.94792	0.498187	0.000209099	0.0024724	TRUE	FALSE
Ank	10.8577	11.2866	10.3414	14.6708	14.5107	14.4698	-0.425968	0.000209437	0.00247378	FALSE	TRUE
Pax8	1.02117	1.0152	1.10503	1.43832	4.77872	1.80349	-1.34845	0.000210295	0.0024813	FALSE	TRUE
Mmp28	7.37743	9.11691	8.33984	4.80809	6.30616	5.11687	0.614439	0.000210651	0.0024829	TRUE	FALSE
Mrps18b	25.9877	28.4654	26.3539	37.1292	35.9168	30.8061	-0.361805	0.00021308	0.00250889	FALSE	TRUE
Vash1	98.8658	97.1408	94.6155	81.3472	83.5948	77.4451	0.261872	0.000214189	0.0025193	FALSE	FALSE
Fbxl16	13.0043	11.1473	11.2588	8.03404	8.57551	8.6819	0.485375	0.000214866	0.00252462	TRUE	FALSE
Cldn4	29.1763	31.4314	31.3787	24.0405	25.8574	22.5436	0.344824	0.000215449	0.00252882	TRUE	FALSE
Athl1	38.9711	38.7966	38.6135	31.417	31.5963	32.274	0.288483	0.000217653	0.00255202	TRUE	FALSE
Bcam	171.119	167.707	180.537	152.4	135.397	144.656	0.264102	0.000217895	0.00255219	TRUE	FALSE
Serinc5	28.9887	27.5697	30.8991	34.5607	35.284	39.6138	-0.323869	0.00022127	0.00258902	FALSE	TRUE
Prodh	24.0496	21.1998	22.3091	28.5814	28.0613	28.4154	-0.332513	0.000225512	0.00263591	FALSE	TRUE
Sdk1	9.14884	10.6098	11.092	6.34915	6.61165	8.19957	0.543816	0.000230379	0.00268999	TRUE	FALSE
Mllt11	12.129	14.1929	12.9685	17.1571	17.5874	17.5525	-0.412125	0.000233904	0.00272831	FALSE	TRUE
Akap2	170.202	166.712	172.468	130.147	124.967	157.805	0.302834	0.000234291	0.00272834	TRUE	FALSE
Gstk1	9.79489	9.89324	10.1329	7.19159	7.46265	6.58482	0.48964	0.000234392	0.00272834	TRUE	FALSE
Tbx20	11.7955	14.3522	11.9468	9.02031	4.73508	8.87064	0.750721	0.000236557	0.00275068	TRUE	FALSE
D430042O09Rik	45.4524	44.9674	45.744	35.9374	35.1312	40.4107	0.288436	0.000237721	0.00276135	TRUE	FALSE
Syne2	140.338	134.166	147.198	84.2033	83.333	132.64	0.490362	0.00023839	0.00276626	TRUE	FALSE
Gar1	98.1781	96.8821	97.7847	114.572	118.202	114.333	-0.245221	0.000238958	0.00276999	FALSE	FALSE
Tnik	15.4009	14.4318	15.533	10.397	9.01192	12.7502	0.495754	0.000239239	0.00277038	TRUE	FALSE
Lsr	34.824	35.532	36.2158	41.2181	43.794	44.3113	-0.279052	0.000241739	0.00279356	FALSE	TRUE
Stk36	16.4012	15.447	15.1577	11.3833	12.285	11.5549	0.416417	0.000241565	0.00279356	TRUE	FALSE
Pnmal2	3.41779	2.96598	3.79463	2.11638	2.20388	1.8664	0.717265	0.000243417	0.00280718	TRUE	FALSE
Rgma	40.034	40.628	38.3216	29.0951	35.1094	24.8923	0.417596	0.00024328	0.00280718	TRUE	FALSE
Fbxl20	51.7253	49.924	53.5209	36.1223	39.5826	47.1423	0.336959	0.000243865	0.00280946	TRUE	FALSE
Btbd7	74.8788	73.9504	78.9575	59.5258	54.5734	69.5181	0.310818	0.00024474	0.00281664	TRUE	FALSE
Cyb5rl	5.43929	5.67318	5.27495	8.36279	7.87725	7.52851	-0.536167	0.000249183	0.00286483	FALSE	TRUE
Chd3	208.36	194.978	208.183	161.667	170.943	180.055	0.254375	0.000252227	0.00289687	FALSE	FALSE
Ccdc134	21.0903	20.4434	23.6226	30.3896	27.7122	26.0247	-0.368894	0.000253994	0.00291418	FALSE	TRUE
Hmha1	40.4716	37.8809	37.8003	45.6563	44.7541	52.6786	-0.300991	0.000256427	0.00293011	FALSE	TRUE
St6galnac4	29.9682	30.5954	30.4821	37.4579	38.557	35.86	-0.297103	0.000256162	0.00293011	FALSE	TRUE
Vps41	101.846	100.306	100.558	83.6896	84.7731	87.4691	0.242164	0.000256362	0.00293011	FALSE	FALSE
Zfyve26	46.7237	45.6044	47.0784	34.5196	35.1312	42.361	0.315551	0.000256279	0.00293011	TRUE	FALSE
Dlat	100.012	106.059	104.769	121.887	122.937	123.518	-0.244834	0.000260734	0.00297327	FALSE	FALSE
Rcc1	271.735	280.255	280.657	340.594	335.754	313.933	-0.250125	0.0002606	0.00297327	FALSE	FALSE
D430041D05Rik	2.25074	1.692	2.29346	3.32868	3.16399	3.79571	-0.72321	0.000262487	0.00299022	FALSE	TRUE
Klc4	27.5716	29.202	29.0852	21.6159	24.6355	21.0547	0.351554	0.000263138	0.00299156	TRUE	FALSE
Nrip1	83.3399	69.3721	78.4571	54.5534	53.3078	70.6505	0.37278	0.000262999	0.00299156	TRUE	FALSE
Txnrd3	18.0893	18.3134	16.9924	22.2117	23.6536	22.5016	-0.356303	0.000263719	0.00299513	FALSE	TRUE
Nell2	14.3589	14.2526	15.8874	9.20524	10.3648	12.3308	0.480103	0.000264664	0.00300282	TRUE	FALSE
Kmt2e	124.708	115.534	131.019	83.9772	89.0718	115.192	0.365105	0.000265852	0.00301326	TRUE	FALSE
Rpl36al	54.768	56.5527	58.4832	71.1351	67.8185	65.303	-0.266546	0.000266282	0.00301509	FALSE	TRUE
Pop5	31.3645	37.1842	33.1092	43.54	42.943	40.5575	-0.321314	0.000268895	0.0030416	FALSE	TRUE
Cldn11	6.21038	6.66848	7.08887	1.5616	5.06239	2.68426	1.1022	0.000271839	0.00307181	TRUE	FALSE
Kdelc1	84.0276	84.6598	86.1714	105.079	100.288	97.9755	-0.25128	0.000272443	0.00307554	FALSE	FALSE
Necab2	15.8802	16.6612	16.4712	21.883	23.239	19.3351	-0.3949	0.000273217	0.00308117	FALSE	TRUE
LOC102636514	8.3986	8.49982	9.21553	6.26696	5.54244	6.33317	0.524724	0.000274997	0.00309814	TRUE	FALSE
Cdh1	48.2242	51.198	56.4399	43.2728	36.1131	44.2274	0.334155	0.000277079	0.0031091	TRUE	FALSE
Colec12	80.0472	77.9316	75.559	64.4572	63.3671	67.7356	0.255999	0.000276844	0.0031091	FALSE	FALSE
Pias3	29.0304	28.6446	28.5431	21.2666	24.8973	21.6838	0.346004	0.000276934	0.0031091	TRUE	FALSE
Tomm34	40.1799	41.7228	38.8011	52.3137	53.1332	44.9613	-0.317262	0.000277007	0.0031091	FALSE	TRUE
D10Wsu102e	127.334	129.448	130.956	151.948	152.701	151.241	-0.233593	0.000279668	0.00313502	FALSE	FALSE
Matn3	5.18921	5.23525	5.75449	7.60254	7.46265	8.36734	-0.534444	0.000280949	0.00314592	FALSE	TRUE
Nat10	108.64	111.473	105.687	131.257	125.119	129.138	-0.242797	0.000281201	0.00314592	FALSE	FALSE
Acacb	4.06384	4.35939	4.37842	5.73273	6.48073	6.85744	-0.574376	0.00028204	0.00315216	FALSE	TRUE
Sox13	170.306	163.169	159.103	134.38	142.707	138.03	0.246867	0.000283425	0.00316449	FALSE	FALSE
Phc2	184.957	198.422	187.688	227.213	234.943	219.564	-0.255471	0.000286292	0.00319332	FALSE	FALSE
Adm2	0.229242	0.278683	0.271045	0.308211	0.34913	4.42483	-2.69361	0.000288269	0.00321219	FALSE	TRUE
Csf1	11.5038	10.5899	11.3213	8.58882	7.98635	7.50754	0.472039	0.000290584	0.00323476	TRUE	FALSE
Dnajb4	17.86	17.8755	17.5554	14.0339	13.7906	12.8131	0.391026	0.000296023	0.00328878	TRUE	FALSE
Pcdh17	17.5266	16.7409	18.6604	13.0065	11.0412	14.7425	0.447718	0.000295893	0.00328878	TRUE	FALSE
Itga8	35.1574	30.8343	29.3771	23.424	26.3157	25.0181	0.351402	0.000297197	0.00329856	TRUE	FALSE
Eif4a1	192.147	198.024	192.984	237.528	242.645	218.348	-0.260396	0.000298597	0.00331082	FALSE	FALSE
Nars	252.979	258.936	253.052	291.568	290.454	359.9	-0.300213	0.000299181	0.00331403	FALSE	TRUE
Nol10	111.099	107.711	99.8071	133.106	122.13	126.559	-0.261006	0.000300406	0.00332431	FALSE	FALSE
Tmem59	104.534	105.641	110.774	128.729	122.785	127.796	-0.241083	0.000304181	0.00336277	FALSE	FALSE
Eif1	101.638	108.069	100.891	121.189	122.545	124.462	-0.245353	0.000306437	0.00338105	FALSE	FALSE
Pea15a	97.8447	99.5893	101.767	86.1142	85.3623	79.0389	0.256215	0.00030635	0.00338105	FALSE	FALSE
Pcdh7	90.759	73.2736	95.3244	65.9983	56.9518	75.2431	0.38782	0.000307673	0.00339135	TRUE	FALSE
Lcp1	51.5378	54.363	50.3727	42.3482	42.3538	44.9194	0.269827	0.000308203	0.003393	TRUE	FALSE
Nsun5	28.5927	28.8038	29.4396	34.8895	37.0732	34.8744	-0.298916	0.000308427	0.003393	FALSE	TRUE
Ntn3	25.425	29.9982	25.7701	21.5953	19.7258	21.8306	0.362554	0.00030938	0.00340015	TRUE	FALSE
Nampt	129.397	125.706	137.858	151.147	149.144	172.296	-0.266248	0.000313913	0.00344518	FALSE	TRUE
Rab11fip5	3.48031	3.60297	2.8147	5.26014	5.82611	4.52969	-0.656492	0.000314092	0.00344518	FALSE	TRUE
Atad1	96.3442	96.0659	96.5545	112.744	110.434	118.024	-0.239756	0.000314962	0.00344799	FALSE	FALSE
Per1	30.5309	30.1774	30.357	35.9785	36.4404	38.5233	-0.284836	0.000314905	0.00344799	FALSE	TRUE
Reep2	1.27125	1.65219	1.87646	2.48624	3.4913	2.49552	-0.817401	0.000316227	0.00345846	FALSE	TRUE
Tmprss13	2.70922	2.72711	3.64868	1.70543	1.57109	2.07611	0.761237	0.0003169	0.00346245	TRUE	FALSE
Dnajb11	96.8443	91.806	100.85	127.086	119.664	107.224	-0.290139	0.000317359	0.00346409	FALSE	TRUE
Imp4	98.6158	97.9172	98.7854	121.23	118.159	111.837	-0.250136	0.000323002	0.00352226	FALSE	FALSE
Pld1	6.91894	6.58886	6.29658	4.56152	3.73133	4.90716	0.584193	0.000324002	0.00352974	TRUE	FALSE
Fndc3b	49.3496	48.232	47.4954	36.1634	33.1455	44.6678	0.347892	0.000325278	0.0035402	TRUE	FALSE
Ccser1	4.62652	5.33478	4.25332	6.78064	7.06988	7.23492	-0.567884	0.000327837	0.00356379	FALSE	TRUE
Ift140	77.2754	76.1401	77.3104	62.0737	61.6433	69.0148	0.25952	0.000328081	0.00356379	FALSE	FALSE
Dmwd	106.097	105.78	104.081	126.058	130.007	119.366	-0.248769	0.000331907	0.00359839	FALSE	FALSE
Nipal3	9.25304	8.83822	9.86187	6.20532	7.13535	6.12347	0.522331	0.000331783	0.00359839	TRUE	FALSE
Cluh	179.934	179.352	175.491	211.72	203.826	213.566	-0.234394	0.000342017	0.00370441	FALSE	FALSE
Tbc1d9b	109.89	108.985	109.44	89.525	92.9777	95.6267	0.239339	0.000347714	0.00376249	FALSE	FALSE
Lingo1	9.56565	7.82302	8.88193	12.0408	12.0886	12.184	-0.46737	0.000348558	0.00376799	FALSE	TRUE
Alcam	5.08501	5.0561	5.5043	8.99976	7.26627	7.02521	-0.574376	0.000349116	0.00377038	FALSE	TRUE
Tulp4	39.2629	37.3037	39.7185	29.0129	27.4285	35.2099	0.343191	0.000350959	0.00378664	TRUE	FALSE
Psd3	17.0681	18.1144	19.2859	12.8832	10.6266	15.4974	0.481168	0.000352422	0.00379878	TRUE	FALSE
Hook1	17.0681	17.8357	19.2233	14.301	12.8305	14.0294	0.39469	0.000354112	0.00381333	TRUE	FALSE
Dennd6b	18.7978	13.4365	12.5932	19.3351	25.0719	20.8869	-0.542425	0.000355505	0.00382466	FALSE	TRUE
Tnfaip8	57.6648	55.3981	57.0237	48.1426	47.9399	45.926	0.260241	0.000365105	0.00392418	FALSE	FALSE
Imp3	53.08	55.7963	53.5835	66.2037	65.7892	62.2832	-0.257941	0.000368436	0.00395619	FALSE	FALSE
Lima1	208.673	213.511	210.519	179.132	181.526	177.245	0.234195	0.000370068	0.00396991	FALSE	FALSE
Irx2	4.79324	5.41441	4.39927	2.91773	2.37845	3.7328	0.693029	0.000371222	0.00397849	TRUE	FALSE
Mfap3l	12.3999	12.1625	12.9476	9.36962	9.14284	9.29005	0.431783	0.000372271	0.00398593	TRUE	FALSE
Plxdc2	17.7975	19.05	20.1824	12.4928	14.1179	16.1056	0.417019	0.000373579	0.00399612	TRUE	FALSE
Trim55	2.10486	2.14984	2.23091	2.56843	4.2332	4.40386	-0.78724	0.000374928	0.00400673	FALSE	TRUE
Slc25a23	26.8213	26.7336	27.6257	19.2735	23.959	19.1253	0.380942	0.000375313	0.00400703	TRUE	FALSE
Smad1	47.9533	48.3116	51.0398	59.8751	59.3957	57.1873	-0.260547	0.000379687	0.00404988	FALSE	FALSE
Pus1	68.2933	67.8194	72.7443	89.3196	83.3984	79.2695	-0.270913	0.000381058	0.00406064	FALSE	TRUE
Gnl1	101.033	105.362	102.663	125.73	126.232	116.199	-0.252408	0.000383814	0.00408613	FALSE	FALSE
Mrc1	4.62652	4.67789	2.50195	1.9931	2.44391	2.07611	0.85864	0.000388458	0.00413164	TRUE	FALSE
Prickle1	73.6909	74.0102	69.3875	59.1765	57.17	64.7997	0.261081	0.00038933	0.004137	FALSE	FALSE
Hsd17b12	131.939	129.269	131.707	157.742	151.13	152.017	-0.230239	0.000390238	0.00414273	FALSE	FALSE
Ano10	16.7763	15.8849	14.5947	19.8077	20.1841	20.8659	-0.364837	0.000391055	0.00414494	FALSE	TRUE
Zc3h8	8.94044	7.88274	8.98618	12.0408	11.5431	11.7646	-0.454097	0.000391185	0.00414494	FALSE	TRUE
Snhg12	16.7138	16.5219	16.0333	19.294	20.7951	32.1901	-0.552853	0.000392896	0.00415913	FALSE	TRUE
Daam1	38.1375	35.1339	43.2838	30.3074	30.5489	32.2321	0.32412	0.000395816	0.00418413	TRUE	FALSE
Nol9	146.986	152.121	147.699	178.249	172.121	175.064	-0.233858	0.000396375	0.00418413	FALSE	FALSE
Prex1	103.513	105.083	102.851	82.128	85.9296	93.7813	0.250336	0.000396297	0.00418413	FALSE	FALSE
Snx2	89.6962	93.3388	89.007	75.5939	78.2488	75.1802	0.248416	0.000401323	0.00423237	FALSE	FALSE
Esrp1	36.4703	35.1538	39.1764	29.4855	28.825	31.7707	0.298444	0.000404012	0.00425673	TRUE	FALSE
Smarcc2	164.429	154.749	165.275	127.476	144.714	133.06	0.257586	0.000405683	0.00427033	FALSE	FALSE
Rpl5	3.9388	5.55375	4.75371	6.92448	8.11727	6.79453	-0.614782	0.000407788	0.00428847	FALSE	TRUE
Atp13a1	97.3237	85.6949	90.2788	107.073	117.264	105.441	-0.271013	0.000408616	0.00429314	FALSE	TRUE
Ppm1e	16.0053	14.2526	15.95	9.80111	11.0194	12.897	0.454492	0.000409726	0.00430079	TRUE	FALSE
Pex26	25.2166	25.1013	25.8744	20.9789	19.4422	20.4675	0.323209	0.000410282	0.00430259	TRUE	FALSE
Cnrip1	8.87792	8.97756	9.84102	12.3079	12.896	12.3308	-0.438419	0.000411806	0.00431052	FALSE	TRUE
Eya1	40.951	41.4043	41.3031	19.6639	37.0514	26.3183	0.574924	0.00041155	0.00431052	TRUE	FALSE
Evx1	12.9626	12.1824	19.0982	6.80119	9.2083	11.3032	0.695747	0.000415251	0.00434253	TRUE	FALSE
Sdad1	172.994	166.812	174.532	203.584	190.45	215.055	-0.243992	0.000416819	0.00435487	FALSE	FALSE
Gfm1	88.9251	92.025	88.7776	111.716	103.844	104.099	-0.245047	0.000418491	0.00436827	FALSE	FALSE
Slc35b1	55.5391	54.7412	57.7326	76.5185	71.288	60.9201	-0.313088	0.00041947	0.00437442	FALSE	TRUE
Epdr1	14.7132	15.2678	15.2619	19.8899	18.5694	19.5028	-0.35747	0.00042072	0.00437931	FALSE	TRUE
Taf1d	49.3287	47.9334	43.5131	52.5397	58.2393	61.8218	-0.293909	0.000420342	0.00437931	FALSE	TRUE
Tyk2	27.7383	29.202	28.2512	22.4583	22.7589	23.697	0.305968	0.000421915	0.00438769	TRUE	FALSE
Acot7	28.8428	30.3565	30.5655	40.8482	40.8264	32.9451	-0.352525	0.000423484	0.00439992	FALSE	TRUE
Fam107a	4.12636	3.28447	3.64868	1.68489	2.83668	1.95028	0.774113	0.000424605	0.00440748	TRUE	FALSE
Hnrnpdl	355.263	361.153	329.34	399.072	419.087	417.654	-0.240889	0.000431592	0.00447587	FALSE	FALSE
Rhbdf1	32.6983	32.6457	32.2335	41.1565	41.3064	37.2231	-0.294564	0.000435721	0.00451453	FALSE	TRUE
Smarcd2	121.686	128.194	117.55	146.708	149.428	139.938	-0.247032	0.000437099	0.00452462	FALSE	FALSE
Kcnab1	3.14687	2.76692	2.773	2.05474	0.872825	1.7196	0.89801	0.000439541	0.0045457	TRUE	FALSE
Zdhhc13	35.1991	34.1187	33.693	41.8345	41.0882	41.1447	-0.268359	0.000440327	0.00454964	FALSE	TRUE
Bahcc1	227.221	207.002	221.068	171.735	163.066	202.389	0.286644	0.000440982	0.00455058	TRUE	FALSE
Mkl2	57.769	55.5972	51.8321	40.6222	38.6443	50.98	0.342843	0.000441229	0.00455058	TRUE	FALSE
Sfn	14.338	15.646	13.7607	11.486	10.9103	10.1289	0.427604	0.000445999	0.00459555	TRUE	FALSE
Ngdn	48.2659	53.5071	51.5611	62.834	62.0797	59.4522	-0.265783	0.000449829	0.00463076	FALSE	TRUE
Igdcc4	64.6254	64.953	64.884	51.7178	52.8277	58.4665	0.254498	0.000452045	0.00464505	FALSE	FALSE
Ikbke	3.20939	2.66739	3.12744	1.49996	1.96386	2.01319	0.716942	0.000451766	0.00464505	TRUE	FALSE
Sqstm1	90.9466	99.3305	93.3229	77.7308	81.0855	79.668	0.250065	0.000456364	0.00468514	FALSE	FALSE
Sspn	5.43929	5.29497	5.00391	3.18485	3.6004	3.75377	0.578625	0.000457437	0.00469186	TRUE	FALSE
March8	73.7534	74.5078	77.081	64.0257	65.3528	59.4731	0.254892	0.000458421	0.00469767	FALSE	FALSE
Abhd11os	2.14654	1.93087	1.89731	2.89718	3.64404	3.10367	-0.689509	0.000463661	0.00473864	FALSE	TRUE
Slc16a1	173.349	162.452	174.115	206.953	192.065	202.808	-0.239157	0.000463687	0.00473864	FALSE	FALSE
Tenc1	34.824	36.7264	34.0266	41.9989	45.256	41.2705	-0.283487	0.000462867	0.00473864	FALSE	TRUE
Svil	75.9625	73.7514	80.3752	60.5532	56.5591	70.5038	0.294252	0.000464135	0.00473891	TRUE	FALSE
Scube1	271.068	267.197	293	231.302	236.841	235.418	0.240621	0.000466014	0.00475377	FALSE	FALSE
2610203C20Rik	3.66787	2.30909	2.27261	1.02737	1.68019	1.7196	0.897768	0.000470023	0.00479031	TRUE	FALSE
Wif1	2.16738	3.42382	2.91895	4.74645	5.3897	3.94251	-0.724282	0.000475466	0.00484139	FALSE	TRUE
Nr2f2	186.332	171.629	167.422	139.003	152.57	149.186	0.25341	0.000476821	0.00485077	FALSE	FALSE
Pa2g4	636.814	645.927	657.201	778.459	755.43	736.661	-0.227032	0.000480687	0.00488126	FALSE	FALSE
Wdr6	353.762	351.518	340.975	289.554	313.235	273.396	0.255955	0.000480682	0.00488126	FALSE	FALSE
Crat	23.9871	27.3308	26.0203	20.5269	21.2097	19.0624	0.347356	0.000483848	0.00490892	TRUE	FALSE
Hoxc11	5.60601	5.41441	6.52593	7.76692	9.18648	8.47219	-0.534877	0.000488472	0.00495135	FALSE	TRUE
Ccdc58	41.5137	42.8972	42.8876	50.0124	48.9655	53.0141	-0.255793	0.000489505	0.00495734	FALSE	FALSE
Wdr75	147.507	153.216	145.218	182.276	169.743	173.995	-0.238253	0.000493631	0.00499462	FALSE	FALSE
Ddr1	39.388	38.2791	40.6359	34.684	31.3781	29.5478	0.307035	0.000495439	0.0050084	TRUE	FALSE
Adm	1.12537	0.53746	0.813135	1.1712	0.894646	11.0097	-2.39786	0.000496747	0.00501483	FALSE	TRUE
Hk2	162.324	150.608	163.899	195.509	174.15	291.389	-0.471303	0.000496969	0.00501483	FALSE	TRUE
Dgat2	15.3175	14.2526	14.8866	18.6981	18.0238	20.4465	-0.363031	0.000497865	0.00501746	FALSE	TRUE
Ift80	53.8094	52.0141	52.1866	43.2317	41.7865	46.8068	0.261259	0.000498124	0.00501746	FALSE	FALSE
M6pr	84.7362	88.86	87.9854	106.168	102.71	100.031	-0.239906	0.000498924	0.00502101	FALSE	FALSE
Pfn1	722.029	741.933	751.295	941.729	971.345	792.255	-0.288323	0.00049991	0.00502642	FALSE	TRUE
Tmem260	30.5309	28.8437	28.3972	22.6843	25.4647	20.6772	0.35101	0.000502321	0.00504615	TRUE	FALSE
Noc3l	62.7498	63.3804	61.0477	75.9843	76.1103	70.6296	-0.250788	0.000504906	0.00506758	FALSE	FALSE
Sdccag3	66.3135	63.6193	62.2361	80.7719	87.8935	69.8327	-0.311512	0.000518142	0.00519577	FALSE	TRUE
Erbb2	83.5066	84.6996	92.4472	74.4843	73.8192	68.91	0.262985	0.000520462	0.00521438	FALSE	FALSE
Apobec3	4.3556	4.91676	4.58691	3.10266	2.59665	3.35532	0.613117	0.000522537	0.00523049	TRUE	FALSE
Fbl	49.9122	49.725	53.6669	60.3066	62.8652	59.7667	-0.25495	0.000535818	0.00535866	FALSE	FALSE
Dpy19l3	36.2202	35.2534	34.4436	40.3757	42.6375	44.7726	-0.270717	0.000536375	0.00535945	FALSE	TRUE
Pnrc1	45.8067	42.937	47.2869	31.5197	35.9822	41.0818	0.325123	0.000545	0.00544079	TRUE	FALSE
Rapgefl1	8.87792	7.34528	7.69351	5.5067	5.47698	5.72502	0.51688	0.000549977	0.00548559	TRUE	FALSE
Arhgap31	56.9771	54.9204	58.2955	45.718	38.9498	51.693	0.319474	0.00055655	0.00554622	TRUE	FALSE
Mocs1	33.6361	37.5226	38.3007	27.9034	29.3051	31.3933	0.305076	0.000558709	0.0055628	TRUE	FALSE
Agtrap	29.7389	29.6996	31.2744	25.6021	24.4391	23.4663	0.303266	0.00055982	0.00556892	TRUE	FALSE
Dzip1	57.9774	55.3384	59.0461	45.307	50.9512	47.1842	0.265069	0.000566143	0.00562683	TRUE	FALSE
1700021K19Rik	44.7022	40.7872	46.4321	36.6155	33.8874	38.041	0.281063	0.000570643	0.00566653	TRUE	FALSE
Anapc15	27.3423	27.291	26.062	33.4923	34.0184	31.3933	-0.293412	0.000578746	0.00574191	FALSE	TRUE
Eif1a	158.615	161.855	160.75	196.865	184.733	184.081	-0.233305	0.000579616	0.00574547	FALSE	FALSE
Pard6b	22.0489	23.7278	20.5577	17.7119	16.6273	17.6993	0.350177	0.00058064	0.00575054	TRUE	FALSE
Lmo2	24.8415	29.5205	27.4381	35.1772	34.4766	32.4837	-0.320103	0.000581638	0.00575535	FALSE	TRUE
Cct2	857.449	845.384	845.41	1016.5	991.988	961.426	-0.220921	0.000593916	0.00587166	FALSE	FALSE
Inpp4a	12.2749	11.4459	11.78	14.3215	15.1653	17.8881	-0.416292	0.000596934	0.0058963	FALSE	TRUE
Sfxn1	135.065	138.028	134.647	165.571	164.113	151.849	-0.239964	0.000597749	0.00589916	FALSE	FALSE
Nyap1	9.48228	9.91314	9.27808	6.26696	6.50255	7.71725	0.484972	0.000598822	0.00590306	TRUE	FALSE
Peli3	7.08566	6.0713	6.94292	10.6847	8.09545	10.2128	-0.529249	0.000599197	0.00590306	FALSE	TRUE
Arhgef5	36.8871	36.6667	36.883	29.8965	28.1268	32.4837	0.28692	0.000600552	0.00590958	TRUE	FALSE
Dlx1	2.1257	1.57257	1.75137	3.24649	2.53119	3.16659	-0.715937	0.000600911	0.00590958	FALSE	TRUE
Pfdn4	38.0333	41.5237	41.5324	47.9782	50.2311	47.4778	-0.266633	0.000602966	0.00592459	FALSE	TRUE
Farsa	123.916	125.507	124.702	147.797	148.533	141.49	-0.226801	0.00060866	0.00597531	FALSE	FALSE
Csgalnact1	4.68904	4.57836	4.64946	2.87664	3.14217	3.29241	0.579626	0.000611349	0.00599646	TRUE	FALSE
Fut10	49.9331	45.8632	52.0615	39.1634	43.4012	38.7959	0.284943	0.000614	0.0060172	TRUE	FALSE
Lad1	17.2974	19.05	19.7446	25.4377	22.4098	23.5921	-0.349047	0.000614659	0.00601841	FALSE	TRUE
Ddx55	22.945	23.6681	24.1021	27.8212	28.4323	30.7851	-0.299587	0.000618197	0.00604777	FALSE	TRUE
Sort1	95.2813	91.2288	96.8464	79.1075	81.8928	79.626	0.23581	0.000618958	0.00604994	FALSE	FALSE
Spred1	142.068	136.734	140.234	161.42	156.847	173.198	-0.230059	0.000629297	0.00614564	FALSE	FALSE
Cnbp	947.603	980.665	951.785	1152.77	1110.8	1093.96	-0.221306	0.000631089	0.00615778	FALSE	FALSE
Lyst	18.8395	16.283	17.9098	11.6709	10.9103	15.6442	0.471875	0.000631646	0.00615786	TRUE	FALSE
Slc16a10	10.7952	12.262	11.1545	17.1365	13.9216	15.0151	-0.429452	0.000633131	0.00616699	FALSE	TRUE
Car12	6.93978	7.70359	8.31899	9.86275	10.103	12.1631	-0.484478	0.000636856	0.00619789	FALSE	TRUE
Sh3rf1	51.9546	53.109	56.8152	45.4098	42.8557	46.8907	0.260127	0.000637838	0.00620206	FALSE	FALSE
Spata13	34.4071	32.0286	33.276	26.0747	25.7265	29.422	0.295668	0.000641539	0.00623265	TRUE	FALSE
Snhg1	70.6274	72.4973	65.9682	77.8336	82.3292	115.297	-0.397672	0.000642156	0.00623325	FALSE	TRUE
Gm11974	11.9206	12.4611	11.8009	13.8695	16.2782	19.2092	-0.447637	0.000648688	0.00628899	FALSE	TRUE
Tmem160	18.3602	21.4586	18.4728	26.2185	25.9884	22.9001	-0.365297	0.00064902	0.00628899	FALSE	TRUE
6720489N17Rik	12.129	11.9834	12.1345	10.0682	7.78996	8.3254	0.468431	0.000650814	0.00630094	TRUE	FALSE
Aif1l	136.503	138.207	136.648	169.023	173.692	149.606	-0.259166	0.00065512	0.00632081	FALSE	FALSE
Car8	13.9004	15.447	14.7824	11.2189	10.8449	11.5549	0.392454	0.000654857	0.00632081	TRUE	FALSE
Ing4	101.137	100.326	103.477	83.6485	92.0612	76.816	0.272176	0.000654156	0.00632081	TRUE	FALSE
Pdss1	16.4221	18.5722	16.5337	22.6638	21.2969	21.5789	-0.346793	0.000654576	0.00632081	FALSE	TRUE
Desi1	75.6916	77.1354	76.3721	95.9975	96.2071	83.8202	-0.268152	0.000656439	0.0063281	FALSE	TRUE
Tmem151b	18.3185	17.4177	17.3052	13.438	14.7289	10.6741	0.44972	0.000666004	0.00641479	TRUE	FALSE
Ddx56	150.883	152.638	148.866	180.488	177.009	172.065	-0.227233	0.00066966	0.00644448	FALSE	FALSE
Snx24	21.0277	21.0206	22.5176	15.9242	17.9366	17.0702	0.342396	0.000674435	0.00648486	TRUE	FALSE
Pbxip1	25.4875	26.2161	26.4999	20.6912	21.9079	20.3836	0.312417	0.000678895	0.00651693	TRUE	FALSE
Tmod3	155.614	158.152	158.394	137.914	132.08	134.8	0.222057	0.000678931	0.00651693	FALSE	FALSE
Eif3c	598.634	580.635	581.704	668.263	658.328	732.174	-0.225413	0.000686518	0.00658412	FALSE	FALSE
Celsr1	32.4273	34.9946	37.4667	27.0815	22.8462	31.2674	0.369089	0.000688019	0.00659288	TRUE	FALSE
Pdgfra	241.163	203.498	226.552	172.804	176.769	203.584	0.279035	0.000694874	0.00665288	TRUE	FALSE
Pla2g12a	12.2749	12.1426	12.9476	15.842	16.2564	16.2524	-0.371833	0.000706997	0.0067626	FALSE	TRUE
Smim14	15.1508	16.1238	14.3654	11.8148	11.5213	11.5339	0.388369	0.000707538	0.0067626	TRUE	FALSE
Hoxa11	64.0211	67.8393	71.4099	84.5526	88.6136	74.8447	-0.286935	0.0007092	0.00676695	FALSE	TRUE
Ube2o	111.516	103.093	104.165	123.51	119.053	133.794	-0.239641	0.000709	0.00676695	FALSE	FALSE
Clptm1l	100.22	104.984	100.328	129.387	124.007	112.173	-0.258779	0.000710827	0.00677671	FALSE	FALSE
Zfp521	142.568	146.846	142.82	117.983	123.898	128.006	0.224771	0.000713737	0.00679868	FALSE	FALSE
Tcn2	23.737	23.27	22.3508	18.1228	19.6604	16.5879	0.351432	0.000714685	0.00680193	TRUE	FALSE
Smoc1	77.2337	81.4749	76.5598	60.7792	72.139	56.3275	0.314239	0.000719959	0.00684632	TRUE	FALSE
Slc16a3	220.385	207.499	236.872	254.582	250.239	298.624	-0.273412	0.000721558	0.00685572	FALSE	TRUE
Lgals3bp	1.56301	1.692	1.81392	2.42459	3.01125	2.7262	-0.68552	0.000722172	0.00685575	FALSE	TRUE
Clic6	7.52331	6.84763	8.46494	5.23959	5.19331	5.53629	0.515353	0.000728165	0.00690679	TRUE	FALSE
Map1lc3b	61.2076	62.0467	60.3805	52.7246	53.2205	46.3244	0.270272	0.000730927	0.00692714	TRUE	FALSE
Alkbh1	35.2616	36.388	35.5486	40.4167	41.5028	49.0087	-0.288455	0.000733622	0.00694681	FALSE	TRUE
Tex10	127.646	124.73	125.702	150.571	142.14	147.676	-0.220134	0.000738606	0.00698811	FALSE	FALSE
Spred2	68.2725	65.1918	65.6137	75.7172	76.0012	84.1977	-0.244983	0.000740298	0.00699821	FALSE	FALSE
Tvp23a	25.8627	25.7582	26.1454	21.0405	22.017	18.3285	0.341346	0.000746735	0.00705313	TRUE	FALSE
Prtn3	2.52166	3.40391	3.52358	2.09584	1.83293	1.88737	0.699171	0.000747685	0.00705616	TRUE	FALSE
Vamp8	20.9861	23.7079	22.8303	29.4855	29.436	26.0038	-0.330561	0.000752431	0.00709499	FALSE	TRUE
Anxa2	85.8199	91.4278	82.8355	57.3889	66.2474	81.0521	0.34561	0.00075468	0.00711022	TRUE	FALSE
Mum1	140.588	133.569	135.251	167.646	170.55	149.459	-0.252314	0.000756948	0.0071256	FALSE	FALSE
Efr3a	54.1011	56.0749	56.565	46.9714	45.9324	48.0021	0.242833	0.000760445	0.00715252	FALSE	FALSE
Sema6a	32.4899	30.6153	36.7579	20.9584	28.4323	26.9684	0.387342	0.000767593	0.0072137	TRUE	FALSE
Flnb	209.902	178.198	198.884	118.559	108.929	188.024	0.498388	0.000768597	0.0072171	TRUE	FALSE
Ccdc80	39.6172	38.936	38.5301	31.7663	33.5165	31.9595	0.267974	0.000770445	0.0072284	TRUE	FALSE
Tut1	71.8153	70.5465	73.6825	84.943	83.3548	85.0575	-0.229888	0.000778305	0.00729604	FALSE	FALSE
Spcs3	120.936	122.859	126.036	150.571	143.602	139.246	-0.228919	0.000781313	0.00731812	FALSE	FALSE
Tcfl5	3.77207	3.82193	3.25254	4.89028	5.717	5.4524	-0.56509	0.000783447	0.007332	FALSE	TRUE
Fgd5	41.5553	41.3446	42.4498	33.6772	32.4691	37.6845	0.271562	0.000787343	0.00736232	TRUE	FALSE
Sp4	28.4469	27.1716	30.1902	21.5953	22.6062	24.9343	0.311564	0.000794926	0.00742703	TRUE	FALSE
Micu1	50.3707	55.0796	52.5619	43.8482	46.3907	38.3136	0.297851	0.000796925	0.00743951	TRUE	FALSE
Dars	196.794	197.088	190.023	229.864	221.327	230.049	-0.222434	0.000797691	0.00744047	FALSE	FALSE
Exosc1	42.7641	44.8878	45.4521	53.9986	54.6607	50.5186	-0.258006	0.000800982	0.00746497	FALSE	FALSE
Etf1	432.163	430.087	418.764	506.206	485.64	494.197	-0.214194	0.000801891	0.00746724	FALSE	FALSE
Fam171b	10.1492	8.87803	11.0711	13.3764	13.507	13.5681	-0.426835	0.000803933	0.00748005	FALSE	TRUE
Ppm1g	359.076	369.115	365.431	446.249	432.005	404.757	-0.230415	0.000810297	0.00753301	FALSE	FALSE
Atic	331.505	333.842	321.438	404.578	374.158	376.551	-0.227454	0.000818475	0.00760274	FALSE	FALSE
Gbx2	8.19019	8.95766	7.08887	10.4792	11.3904	11.492	-0.460276	0.000820769	0.00761774	FALSE	TRUE
Crabp1	410.302	445.275	431.107	550.301	567.14	456.156	-0.290391	0.000826263	0.00766239	FALSE	TRUE
Cyp39a1	19.7982	20.8415	20.6411	14.8969	17.0856	16.2524	0.345692	0.00083406	0.00772125	TRUE	FALSE
Fbln2	36.4912	36.4477	34.527	25.9925	27.254	32.7773	0.321074	0.000834674	0.00772125	TRUE	FALSE
Mtap	211.549	216.815	214.042	261.938	250.741	241.227	-0.2309	0.000834054	0.00772125	FALSE	FALSE
Ecm1	7.56499	6.17083	6.44253	9.12305	10.9976	8.78676	-0.518351	0.000835597	0.00772342	FALSE	TRUE
Zfp874a	8.12767	7.28556	7.69351	4.25331	5.04057	6.3122	0.566036	0.00083893	0.00774784	TRUE	FALSE
Zfp219	135.065	131.558	137.566	112.559	121.934	106.028	0.247334	0.00084513	0.00779868	FALSE	FALSE
D930015E06Rik	192.23	167.548	189.731	153.14	156.476	154.974	0.242139	0.000851008	0.00782803	FALSE	FALSE
Gemin5	190.896	189.445	180.057	220.761	209.151	225.708	-0.226423	0.000849346	0.00782803	FALSE	FALSE
Pclo	3.16771	2.58777	2.50195	1.19175	1.04739	2.26484	0.872111	0.000851101	0.00782803	TRUE	FALSE
Trim27	209.486	210.704	205.181	244.021	244.631	239.738	-0.219987	0.000850464	0.00782803	FALSE	FALSE
Spats2l	12.4833	12.1824	13.0727	9.94494	9.36105	9.05938	0.411558	0.00085196	0.00782952	TRUE	FALSE
Aup1	65.1047	66.4459	67.9697	78.6144	80.1253	76.2497	-0.236023	0.000859284	0.00788078	FALSE	FALSE
Inadl	34.1154	30.9338	35.5277	25.4993	23.4135	30.4496	0.341405	0.000859645	0.00788078	TRUE	FALSE
Tex15	9.21136	7.7434	8.13135	6.53408	4.82236	5.87182	0.540855	0.000858418	0.00788078	TRUE	FALSE
Slc7a2	15.9427	14.6308	17.1592	19.4378	18.7657	30.0511	-0.516117	0.000866945	0.00794122	FALSE	TRUE
4930402H24Rik	17.0056	17.4376	17.4928	12.2668	13.3979	14.5327	0.369732	0.000876437	0.00802161	TRUE	FALSE
Parva	156.718	157.416	153.203	135.428	134.524	131.969	0.217555	0.000885188	0.00809511	FALSE	FALSE
C1qb	3.95964	4.45892	2.58535	2.21912	2.40027	1.90834	0.753887	0.000912422	0.00833736	TRUE	FALSE
Cdkn3	12.4208	11.9435	11.5715	9.82166	8.70643	7.23492	0.479812	0.000915326	0.0083571	TRUE	FALSE
Tgfbi	47.3281	44.5494	42.9293	33.2046	41.241	33.8259	0.31652	0.000916083	0.00835721	TRUE	FALSE
Tacstd2	4.54316	5.53384	5.4626	3.86291	3.29491	3.25047	0.577592	0.000917984	0.00836775	TRUE	FALSE
Serp2	3.20939	3.54325	3.04404	4.86974	5.78247	4.27804	-0.606382	0.00091915	0.00837158	FALSE	TRUE
Rnf182	3.45947	3.00579	3.37764	2.05474	2.31299	1.97125	0.634468	0.000926533	0.00843197	TRUE	FALSE
Csrp2	141.401	148.359	148.595	127.949	126.472	120.708	0.224722	0.00093018	0.0084583	FALSE	FALSE
Gjb2	5.31425	4.41911	3.16914	2.50678	2.92396	2.51649	0.699288	0.000932093	0.00846884	TRUE	FALSE
Sema3b	7.62751	7.70359	7.9854	5.21904	5.69518	5.80891	0.479532	0.000938675	0.00852174	TRUE	FALSE
Adss	136.149	140.317	129.622	160.619	154.446	159.147	-0.223726	0.000943246	0.00855631	FALSE	FALSE
Celf3	2.1257	1.65219	1.98071	2.63007	2.90214	3.79571	-0.696015	0.000949319	0.00860445	FALSE	TRUE
Cldn3	5.54349	6.09121	5.56685	3.61634	4.45141	3.66989	0.552225	0.000957402	0.00867071	TRUE	FALSE
Dhx33	125.083	125.208	124.18	148.66	142.358	143.629	-0.21501	0.000959871	0.00867906	FALSE	FALSE
Ncdn	64.8963	68.4763	66.0933	82.0869	80.409	74.3833	-0.247953	0.00095957	0.00867906	FALSE	FALSE
Nnat	329.733	339.734	343.581	436.982	517.869	351.701	-0.367038	0.000961539	0.00868714	FALSE	TRUE
Rassf4	9.56565	9.39559	9.88271	6.84229	7.0917	7.44463	0.431942	0.000964787	0.00870947	TRUE	FALSE
Trmt6	90.8424	90.1738	86.4008	105.141	102.993	103.47	-0.220617	0.000965963	0.00871308	FALSE	FALSE
Chuk	49.558	50.1032	44.3263	57.8615	55.9263	57.9423	-0.254137	0.000967863	0.0087232	FALSE	FALSE
Nop58	353.366	364.378	354.735	410.825	400.518	432.103	-0.213394	0.000971031	0.00874473	FALSE	FALSE
Hpdl	2.50082	2.62758	2.10581	3.82182	3.53494	3.66989	-0.607173	0.000980837	0.00881935	FALSE	TRUE
Prss8	11.4829	12.4611	14.3028	9.47235	9.31741	9.56267	0.431644	0.000980889	0.00881935	TRUE	FALSE
Ccbe1	9.69069	7.72349	8.38154	5.75327	4.9751	6.92036	0.5466	0.000986343	0.0088613	TRUE	FALSE
Wt1	13.4628	14.0536	12.2804	16.0681	30.2216	16.525	-0.657888	0.000988536	0.00887389	FALSE	TRUE
Asap3	8.56532	8.81832	9.19468	4.99302	6.82986	6.64774	0.525537	0.000992666	0.00889673	TRUE	FALSE
Srfbp1	45.7025	49.1278	46.8699	57.3478	52.915	58.131	-0.249013	0.000992503	0.00889673	FALSE	FALSE
Itfg3	31.7396	29.3413	32.1918	25.2528	26.4902	24.4729	0.291316	0.000997094	0.00892928	TRUE	FALSE
Ptx3	8.77372	8.71879	8.38154	6.02039	6.72075	5.85085	0.477111	0.001006	0.00900186	TRUE	FALSE
Camkv	6.66886	5.713	5.0873	8.42444	7.76814	8.74481	-0.513592	0.00100859	0.0090178	FALSE	TRUE
Btbd2	129.084	133.449	131.498	113.278	117.111	102.526	0.243207	0.00102009	0.00911338	FALSE	FALSE
Snrk	44.5563	46.2016	46.0776	35.7319	36.3095	41.7738	0.265729	0.00102626	0.0091612	TRUE	FALSE
Cic	168.701	159.805	175.241	146.873	146.526	131.256	0.246385	0.0010301	0.00918522	FALSE	FALSE
Slc11a2	60.0197	60.2552	61.7357	71.9365	75.1284	67.9034	-0.240036	0.00103058	0.00918522	FALSE	FALSE
Helq	26.9047	25.8379	25.228	30.8622	31.9454	31.6449	-0.27659	0.00104438	0.00930075	FALSE	TRUE
Tomm70a	297.869	306.889	292.27	353.806	333.965	354.448	-0.216436	0.00104627	0.00931023	FALSE	FALSE
Anp32b	531.466	533.737	550.617	641.449	612.33	617.128	-0.21148	0.00105229	0.00934901	FALSE	FALSE
Ift74	73.2533	72.776	75.4339	64.2517	62.6034	62.7865	0.223722	0.00105153	0.00934901	FALSE	FALSE
Fam115a	104.409	98.6338	95.9291	82.0252	88.9409	82.9604	0.235667	0.00105344	0.00935175	FALSE	FALSE
Tubb2b	63.3958	61.9074	63.9249	53.1356	56.4281	49.1345	0.253912	0.00106322	0.00943111	FALSE	FALSE
Cdon	118.852	112.289	107.021	85.5594	84.2494	106.762	0.290015	0.0010651	0.00944032	TRUE	FALSE
Bscl2	16.6305	16.9797	15.8666	20.7118	21.6461	19.9013	-0.33126	0.00108675	0.00960944	FALSE	TRUE
Nr4a1	7.56499	7.80312	6.67187	10.2943	10.2121	9.49976	-0.444693	0.00108599	0.00960944	FALSE	TRUE
Pcdh1	41.5345	40.8668	42.6166	35.5881	32.12	36.573	0.261372	0.00108561	0.00960944	FALSE	FALSE
Pwp2	86.3409	83.983	81.3969	98.7097	94.9634	99.737	-0.221129	0.00109241	0.00965194	FALSE	FALSE
Ppp1r15a	18.0268	18.9703	18.3477	20.5474	22.9553	31.582	-0.439958	0.00110202	0.00972914	FALSE	TRUE
Wdr3	124.353	120.829	123.68	145.907	137.492	144.321	-0.213645	0.00110361	0.00973555	FALSE	FALSE
Zfp598	98.7616	106.477	105.77	120.695	121.104	121.19	-0.222935	0.00110613	0.00975012	FALSE	FALSE
Irx5	40.2632	40.8071	33.5887	27.5541	28.4323	34.413	0.343019	0.00111032	0.00977934	TRUE	FALSE
Rap1gds1	117.997	115.653	116.028	136.64	128.676	141.112	-0.21703	0.00111131	0.00978037	FALSE	FALSE
Gtpbp10	21.0486	19.6471	19.3484	25.0473	25.4647	23.8647	-0.308796	0.00111586	0.00981271	FALSE	TRUE
Runx1t1	28.4469	27.1517	24.7485	16.3557	20.0968	24.0745	0.408803	0.00111783	0.0098224	TRUE	FALSE
Iqsec1	65.98	64.5549	66.3852	55.7246	52.304	59.3263	0.234538	0.00112476	0.00987549	FALSE	FALSE
Sgk1	27.0089	23.6681	23.9771	17.8762	18.3511	22.25	0.352153	0.00112694	0.00988695	TRUE	FALSE
Magi3	80.6724	69.8299	77.6648	60.1012	54.0279	70.8812	0.302277	0.00112951	0.00990176	TRUE	FALSE
Bicd1	11.9623	10.9881	10.5499	7.52035	6.43709	9.62559	0.505779	0.00113246	0.00991215	TRUE	FALSE
Me2	110.974	110.378	110.837	132.181	120.384	135.471	-0.224265	0.00113161	0.00991215	FALSE	FALSE
Skida1	42.2014	37.025	37.3833	31.3964	34.0838	28.5622	0.310367	0.00113493	0.00992598	TRUE	FALSE
Kri1	34.553	33.5215	34.4019	40.6839	38.9935	42.1303	-0.24945	0.00113818	0.00994668	FALSE	FALSE
Fam189b	42.4723	39.6924	40.198	34.4991	35.2621	32.0853	0.264762	0.00114194	0.00997174	TRUE	FALSE
Sostdc1	7.94011	7.70359	9.52827	5.91765	4.71326	6.60579	0.545236	0.00114532	0.00999352	TRUE	FALSE
Eif3b	622.955	622.916	613.875	726.412	725.623	698.18	-0.209373	0.00115187	0.0100428	FALSE	FALSE
Dab2ip	155.947	153.554	161.293	138.263	136.095	129.453	0.221389	0.00115339	0.0100483	FALSE	FALSE
Prdx3	88.55	100.565	92.4472	113.73	109.561	109.174	-0.239681	0.00116246	0.0101116	FALSE	FALSE
Tsr1	117.08	114.121	113.776	135.942	127.323	137.568	-0.21656	0.00116183	0.0101116	FALSE	FALSE
Cbwd1	22.1531	23.0112	21.9129	27.3691	26.4902	27.8911	-0.28535	0.00116351	0.0101129	FALSE	TRUE
Grwd1	126.312	128.114	125.494	154.886	149.908	139.896	-0.227095	0.00116458	0.0101144	FALSE	FALSE
Tmem199	37.0122	37.8809	36.0698	46.581	45.2996	41.3753	-0.264052	0.00116936	0.010148	FALSE	TRUE
Dmrt2	1.45881	0.358306	0.187646	6.26696	1.06921	1.5099	-2.1389	0.00118125	0.0102433	FALSE	TRUE
Gimap4	18.1518	19.2092	21.767	16.3763	15.0781	14.4279	0.365641	0.0011846	0.0102644	TRUE	FALSE
Arhgap29	212.466	204.135	203.701	152.092	130.727	199.327	0.363445	0.00118619	0.0102702	TRUE	FALSE
Itfg2	32.4273	35.1339	34.9648	40.1702	40.3682	41.6689	-0.253244	0.00119041	0.0102988	FALSE	FALSE
Sash1	53.7052	52.6909	50.9981	60.1834	58.6538	68.0082	-0.247507	0.00119566	0.0103363	FALSE	FALSE
Cd40	3.54283	3.7025	4.08652	4.56152	6.1316	6.18638	-0.574051	0.00120595	0.0104172	FALSE	TRUE
Prkrip1	35.5117	34.8552	33.4636	41.9784	40.7609	40.7672	-0.250362	0.00120875	0.0104333	FALSE	FALSE
1700020I14Rik	46.9321	42.3996	49.2259	38.9784	36.7459	39.8235	0.261691	0.00121737	0.0104997	FALSE	FALSE
Pard3b	8.44028	9.49512	7.8186	5.73273	4.95328	7.04618	0.538025	0.00121998	0.0105141	TRUE	FALSE
Cisd1	36.2828	39.3142	38.6969	50.1562	46.5216	42.1722	-0.280754	0.00122656	0.0105628	FALSE	TRUE
Ier5	32.344	31.7101	31.8374	26.0952	27.9304	25.0391	0.278506	0.00123537	0.0106223	TRUE	FALSE
Ssbp1	49.0995	51.5762	49.1425	58.2108	59.5485	58.3407	-0.233057	0.0012345	0.0106223	FALSE	FALSE
AI506816	20.9861	30.2371	29.7941	24.4103	57.7592	55.5516	-0.765233	0.00124597	0.0107053	FALSE	TRUE
Ptp4a1	13.7962	13.7749	13.2812	18.9858	17.9802	15.8958	-0.371753	0.00124797	0.0107142	FALSE	TRUE
Cxxc5	105.972	106.457	105.291	88.0662	89.7919	95.6477	0.216187	0.00125064	0.0107289	FALSE	FALSE
Aagab	78.5675	82.2313	83.7112	103.045	95.2907	90.9293	-0.242529	0.00125445	0.0107452	FALSE	FALSE
Lhpp	33.9903	33.5614	36.8204	45.4303	44.9287	37.9781	-0.298226	0.00125372	0.0107452	FALSE	TRUE
Tdrd7	13.1293	12.9388	13.719	10.6436	9.90657	9.83529	0.388577	0.00125883	0.0107745	TRUE	FALSE
Bhlhe40	7.27323	6.09121	7.65181	7.41761	7.87725	51.6091	-1.6703	0.00126231	0.0107878	FALSE	TRUE
Ftsj3	251.833	244.763	246.526	291.403	285.043	285.056	-0.213267	0.00126211	0.0107878	FALSE	FALSE
Dap	38.2417	42.2403	40.6984	33.0402	35.5022	31.9385	0.270478	0.00127787	0.0109125	TRUE	FALSE
Atp13a3	109.203	110.1	111.316	131.298	117.919	140.253	-0.236418	0.00127941	0.0109173	FALSE	FALSE
Adam23	5.73105	5.79262	5.4626	3.30813	4.05864	4.31998	0.539883	0.00128859	0.0109873	TRUE	FALSE
Rpl36	12.3582	11.0279	10.9043	15.801	15.1872	13.9036	-0.388729	0.00129843	0.0110628	FALSE	TRUE
Tbl3	156.03	149.254	148.533	188.728	194.509	161.496	-0.263416	0.00130243	0.0110884	FALSE	TRUE
6030458C11Rik	54.4762	53.1488	51.2275	61.6628	60.0285	64.5061	-0.229179	0.00130638	0.0111136	FALSE	FALSE
Epha4	53.9761	53.1488	53.375	55.1903	68.0585	75.369	-0.307314	0.00132893	0.0112969	FALSE	TRUE
Cers2	79.0468	74.2092	79.8749	91.025	95.3998	87.8676	-0.234582	0.00133149	0.0113015	FALSE	FALSE
Sparc	244.976	247.649	254.866	214.207	221.152	206.415	0.220004	0.00133131	0.0113015	FALSE	FALSE
Ttc8	28.9262	27.3109	29.2103	23.3419	23.8499	23.2146	0.279238	0.00133517	0.0113242	TRUE	FALSE
Ldlrap1	31.5104	31.8694	33.1509	27.7185	25.0937	27.1781	0.270879	0.00133661	0.0113278	TRUE	FALSE
Rasip1	66.5636	66.008	65.2801	55.2314	56.8646	57.8374	0.219477	0.00133784	0.0113297	FALSE	FALSE
Cdv3	176.746	174.893	169.987	211.618	196.364	199.118	-0.218941	0.00133985	0.0113382	FALSE	FALSE
Hspb1	3.58451	4.02099	3.91973	2.79445	2.44391	2.47455	0.578619	0.00135257	0.0114373	TRUE	FALSE
Pkd1	63.2916	59.7774	65.8848	48.985	48.1145	59.1795	0.273758	0.00135627	0.0114599	TRUE	FALSE
Eva1b	35.1782	35.4723	34.1308	39.9647	42.572	41.8577	-0.247372	0.00136298	0.0115079	FALSE	FALSE
Stox2	176.641	159.625	168.173	141.551	136.313	152.814	0.227996	0.00136612	0.0115258	FALSE	FALSE
Rrn3	141.963	149.294	139.734	171.674	163.393	166.11	-0.217643	0.00136827	0.0115352	FALSE	FALSE
Kif13b	16.5263	14.8896	16.638	9.41071	10.8449	14.4069	0.471127	0.00137196	0.0115576	TRUE	FALSE
Rmrp	2.6467	1.75172	2.66875	2.50678	4.47323	6.24929	-0.904242	0.00137732	0.0115941	FALSE	TRUE
Ppat	178.288	186.936	181.225	210.467	205.441	217.048	-0.21201	0.00139053	0.0116965	FALSE	FALSE
Dis3	131.918	131.299	132.249	153.284	146.22	156.966	-0.207002	0.00139416	0.0117095	FALSE	FALSE
Wbscr27	8.56532	8.22114	9.48657	5.60944	6.8735	6.33317	0.481818	0.00139349	0.0117095	TRUE	FALSE
Sltm	134.648	132.016	137.837	150.88	150.06	174.729	-0.233847	0.00139908	0.011741	FALSE	FALSE
Snhg8	15.9844	16.7807	14.5322	18.7803	21.3842	19.9432	-0.345282	0.00140001	0.011741	FALSE	TRUE
Ddx54	170.327	174.117	168.319	204.097	203.346	190.016	-0.220528	0.00141301	0.0118412	FALSE	FALSE
Lrrc8c	20.0066	21.5979	20.3492	15.5338	15.5799	18.0349	0.334051	0.00141515	0.0118503	TRUE	FALSE
Adamts12	17.6516	16.9598	15.8666	10.2943	10.9321	15.3506	0.464595	0.00141711	0.0118579	TRUE	FALSE
C2cd3	110.182	109.662	113.276	89.5867	89.4864	103.7	0.236346	0.00142019	0.0118748	FALSE	FALSE
Clpp	70.419	79.4246	75.6632	93.7167	89.0063	84.9946	-0.247485	0.00142867	0.0119368	FALSE	FALSE
Set	267.463	257.742	258.764	309.752	301.757	297.911	-0.214162	0.00143286	0.0119629	FALSE	FALSE
2700038G22Rik	16.3387	14.1531	14.136	20.0954	19.6167	17.5735	-0.360327	0.00143914	0.0120064	FALSE	TRUE
Kcnh2	30.906	29.819	30.4613	25.1089	25.7047	24.8504	0.269196	0.00144081	0.0120114	TRUE	FALSE
Nefl	4.89744	3.40391	2.7313	6.22586	7.06988	4.82328	-0.715264	0.00144469	0.0120348	FALSE	TRUE
Pnn	247.456	235.049	237.373	275.274	276.882	280.715	-0.210349	0.00144976	0.0120681	FALSE	FALSE
Slc15a2	3.41779	8.22114	7.9854	12.575	11.0631	10.4015	-0.794002	0.00145219	0.0120793	FALSE	TRUE
Nom1	71.982	73.9903	72.4941	83.3608	84.2713	86.4415	-0.217795	0.00146107	0.0121442	FALSE	FALSE
Rgl1	67.8348	67.3417	64.5712	83.7512	81.6746	72.5799	-0.252789	0.00148182	0.0123075	FALSE	FALSE
Usp14	155.718	156.003	154.371	179.913	174.107	184.207	-0.207619	0.00148499	0.0123247	FALSE	FALSE
Klhl24	81.3184	79.9421	85.0873	54.9232	61.556	78.934	0.334156	0.00148969	0.0123546	TRUE	FALSE
Lgals1	77.0253	86.2921	84.2533	70.6009	72.7718	59.6409	0.286352	0.00149388	0.0123711	TRUE	FALSE
Surf6	80.0055	81.0967	80.4795	95.6687	92.2794	92.6699	-0.216111	0.00149282	0.0123711	FALSE	FALSE
Ptprg	128.521	117.306	120.031	141.346	131.535	165.816	-0.262009	0.0014988	0.0124027	FALSE	FALSE
Cobll1	16.6096	15.5067	17.9307	20.8351	19.2894	23.5502	-0.347794	0.00151231	0.0125052	FALSE	TRUE
Rab13	25.0499	25.2407	25.8118	22.0268	19.8786	19.9432	0.298939	0.00152233	0.0125788	TRUE	FALSE
Eef1d	373.998	383.846	381.694	461.043	463.448	411.572	-0.22953	0.00152734	0.0126025	FALSE	FALSE
Zfp644	101.909	91.0098	96.9507	82.5389	79.5362	85.6656	0.22644	0.00152744	0.0126025	FALSE	FALSE
Mtrr	41.8888	40.1701	40.2189	48.3891	47.5035	47.7085	-0.231961	0.00152929	0.0126085	FALSE	FALSE
Rrp12	99.3868	99.2708	93.0101	123.305	103.801	119.156	-0.247617	0.00153173	0.0126176	FALSE	FALSE
Srf	107.077	106.915	110.128	124.579	127.062	123.077	-0.209271	0.00153355	0.0126176	FALSE	FALSE
Wdr46	112.37	118.341	118.426	142.599	135.659	129.453	-0.223753	0.00153377	0.0126176	FALSE	FALSE
Lamb2	37.8249	32.0286	34.8814	26.0541	28.6723	30.4705	0.297789	0.00153523	0.0126204	TRUE	FALSE
Robo4	12.7125	12.1625	12.6766	15.9448	15.3835	16.4411	-0.34737	0.00154105	0.0126589	FALSE	TRUE
Dus3l	56.6853	50.5013	52.9789	63.2244	68.4731	59.7038	-0.257016	0.0015551	0.012765	FALSE	FALSE
Arap3	73.5242	77.6131	69.7002	60.2655	60.465	66.6661	0.236942	0.00157067	0.0128834	FALSE	FALSE
Ak2	198.565	207.121	204.722	254.418	240.071	223.045	-0.233271	0.00158563	0.0129966	FALSE	FALSE
Gne	30.7601	33.1035	31.8999	39.2661	40.4991	35.9649	-0.273018	0.00159029	0.0130253	FALSE	TRUE
Ccdc137	46.6612	46.759	44.368	50.7932	56.1008	56.0759	-0.241982	0.00159312	0.013039	FALSE	FALSE
Dgkz	205.463	212.655	204.806	250.761	254.974	226.421	-0.233066	0.00159776	0.0130674	FALSE	FALSE
Arrdc3	77.5672	68.7351	75.3713	87.9223	81.2818	172.904	-0.626035	0.00160388	0.0131079	FALSE	TRUE
Elovl2	54.0178	54.5621	57.7951	70.1899	66.2038	61.0459	-0.247032	0.00160512	0.0131085	FALSE	FALSE
Plagl1	123.77	131.26	121.512	100.128	94.3088	119.156	0.263885	0.00161466	0.0131768	TRUE	FALSE
Prkci	249.832	237.458	253.427	212.83	189.774	225.897	0.236937	0.00161595	0.0131777	FALSE	FALSE
Arhgap32	97.1778	87.4865	90.7583	65.1764	62.6034	89.1887	0.344068	0.00162016	0.0132024	TRUE	FALSE
Nol8	73.2116	70.0091	72.2022	89.2579	76.7213	88.9161	-0.2429	0.00163446	0.0133094	FALSE	FALSE
Nicn1	30.8018	31.3518	30.3362	25.787	25.9011	25.2908	0.264879	0.0016449	0.0133846	TRUE	FALSE
Ttc12	4.37644	5.49403	5.27495	3.02047	3.42584	3.83765	0.558798	0.0016517	0.0134302	TRUE	FALSE
Rit1	21.4862	23.7278	23.2056	17.7735	18.5257	18.9995	0.307317	0.00166606	0.0135372	TRUE	FALSE
Sh2d3c	40.4091	40.2697	40.3648	32.7937	35.3494	34.1195	0.243381	0.00167871	0.0136301	FALSE	FALSE
Gm13154	0.291763	0.218965	0.145947	0.205474	3.6004	0.188737	-2.5889	0.00169174	0.013726	FALSE	TRUE
Sec23a	102.284	99.0916	95.7414	86.3402	84.5113	85.6866	0.211828	0.0016948	0.0137316	FALSE	FALSE
Tead3	46.4111	45.1466	44.6599	38.4442	39.5608	37.7893	0.23439	0.00169488	0.0137316	FALSE	FALSE
Capn5	12.6292	16.3826	14.1152	8.99976	10.103	12.226	0.461385	0.0016986	0.0137518	TRUE	FALSE
Kcnab2	5.16837	5.17554	4.87881	3.47251	3.90589	3.14562	0.532938	0.00170135	0.0137642	TRUE	FALSE
Jup	78.1507	81.4152	76.1845	67.6832	66.7711	67.6937	0.22188	0.00170395	0.0137703	FALSE	FALSE
Tmem132e	1.9173	1.45313	2.12666	2.19857	3.16399	3.87959	-0.749346	0.00170457	0.0137703	FALSE	TRUE
Magohb	17.214	18.0348	17.2218	21.3898	21.9297	21.3692	-0.301788	0.00170724	0.013782	FALSE	TRUE
Rnf149	42.514	43.2555	39.9062	49.396	47.6344	51.0009	-0.236169	0.00171247	0.0138143	FALSE	FALSE
Pgm2l1	36.4078	32.8846	37.2583	27.0609	29.0433	31.603	0.280657	0.00171423	0.0138185	TRUE	FALSE
Mrpl13	108.536	114.101	110.982	130.825	134.306	123.329	-0.219504	0.0017286	0.0139243	FALSE	FALSE
Ubl4b	3.37611	3.60297	2.91895	4.68481	4.1241	6.29123	-0.608957	0.00173237	0.0139447	FALSE	TRUE
Ccdc94	14.6923	15.2479	16.075	20.0543	18.7439	18.8108	-0.324284	0.00174156	0.0140087	FALSE	TRUE
Phldb1	132.398	129.15	133.083	112.353	114.515	115.843	0.203499	0.00174357	0.0140147	FALSE	FALSE
BC068157	6.18954	6.46942	7.63096	5.01357	4.80054	4.50872	0.50196	0.00174951	0.0140525	TRUE	FALSE
Snhg3	20.2983	21.4984	16.5337	28.5609	27.3194	21.5999	-0.409325	0.00176019	0.0141281	FALSE	TRUE
Srprb	86.9036	90.6913	95.5538	112.004	108.165	100.702	-0.232316	0.0017633	0.0141429	FALSE	FALSE
Pitpnm1	12.9209	11.0478	12.0094	17.0338	15.9509	14.1343	-0.389442	0.00177505	0.014227	FALSE	TRUE
Trmt10a	32.7816	33.6609	33.7555	39.0606	39.2335	40.2219	-0.24219	0.00178526	0.0142987	FALSE	FALSE
Rassf7	26.1128	23.9667	25.9578	19.6228	21.8643	20.2997	0.299476	0.00179195	0.014342	TRUE	FALSE
Slc43a1	42.9725	44.1513	44.4514	53.1972	53.155	48.9668	-0.239295	0.00179809	0.0143809	FALSE	FALSE
Arhgap27	28.9053	29.7991	27.6674	22.8693	24.8755	23.4873	0.278302	0.00180225	0.0144039	TRUE	FALSE
Emc2	47.6615	51.8151	51.8738	64.2517	63.3235	54.5869	-0.267255	0.00181907	0.0145161	FALSE	TRUE
Shb	24.3205	26.2559	27.313	32.3622	30.898	30.9529	-0.274516	0.00181805	0.0145161	FALSE	TRUE
Upk1a	4.6682	5.67318	4.08652	3.32868	3.29491	3.10367	0.569135	0.00182017	0.0145161	TRUE	FALSE
Spire1	69.6896	66.6052	69.4917	78.1829	75.3248	91.5374	-0.251991	0.00182444	0.0145398	FALSE	FALSE
Fam168a	95.4897	82.1716	94.5113	77.0733	74.0156	79.2905	0.240346	0.00183453	0.0146098	FALSE	FALSE
Pygb	111.016	116.947	114.214	99.6344	100.026	95.0605	0.215432	0.00184279	0.0146652	FALSE	FALSE
Cct6a	947.645	954.946	952.952	1141.68	1081.21	1064.04	-0.202976	0.00184858	0.0147009	FALSE	FALSE
Abcf2	273.131	284.256	269.21	324.649	325.433	309.927	-0.215842	0.00186543	0.0148243	FALSE	FALSE
Pex14	57.2897	56.8712	56.2105	65.2791	67.8622	64.8207	-0.216467	0.00187112	0.0148591	FALSE	FALSE
Plcxd2	5.41845	5.35469	6.00469	3.5958	3.75315	4.40386	0.513073	0.00187644	0.0148907	TRUE	FALSE
Atg9b	3.14687	3.34419	3.85718	4.80809	5.25877	4.86522	-0.528585	0.00188195	0.0149214	FALSE	TRUE
Chn2	9.58649	9.21644	10.3623	12.4928	13.2451	12.3728	-0.385924	0.00188295	0.0149214	FALSE	TRUE
Ncoa2	111.162	106.795	115.277	93.0387	83.7912	103.68	0.248351	0.00189482	0.0150048	FALSE	FALSE
Dusp1	13.567	14.2924	13.2187	15.9859	17.0201	19.7125	-0.359699	0.00190929	0.0151087	FALSE	TRUE
Agpat5	56.0184	56.7916	57.9411	67.601	62.7779	68.2599	-0.218357	0.00192111	0.0151915	FALSE	FALSE
Lbp	3.75123	4.20015	4.00312	2.36295	3.16399	2.47455	0.580406	0.00192536	0.0152144	TRUE	FALSE
Marveld1	29.5722	29.1024	28.9393	36.9853	35.8513	32.7773	-0.269571	0.00193068	0.0152457	FALSE	TRUE
Lhx6	9.64901	9.05719	9.00703	6.10258	7.15717	7.13006	0.442929	0.00193553	0.0152733	TRUE	FALSE
Hmgcr	282.447	259.911	300.631	347.292	334.728	311.437	-0.236975	0.00193899	0.0152898	FALSE	FALSE
Wdr36	154.447	154.51	149.7	172.66	172.077	184.207	-0.205699	0.00194564	0.0153315	FALSE	FALSE
Slc5a6	13.1502	13.2573	12.8017	16.7256	16.6928	16.1056	-0.336804	0.00195754	0.0154144	FALSE	TRUE
Gart	345.384	352.414	340.37	410.66	396.415	389.176	-0.204478	0.00196222	0.0154404	FALSE	FALSE
Dip2a	40.3883	40.0706	41.2822	33.0402	32.6437	36.9505	0.24618	0.00200031	0.0157181	FALSE	FALSE
Wdr35	46.5778	48.7894	47.4537	58.3752	51.5403	58.823	-0.240688	0.00199935	0.0157181	FALSE	FALSE
Pus7l	22.7992	22.7724	22.1423	28.9924	27.254	26.0457	-0.281332	0.00201652	0.0158344	FALSE	TRUE
Tmem100	7.39827	7.7633	7.04717	10.849	11.8704	8.36734	-0.484586	0.00202016	0.0158519	FALSE	TRUE
Zbtb5	70.3148	68.4763	69.9504	60.1628	60.7486	59.3473	0.21163	0.00203506	0.0159576	FALSE	FALSE
Fnbp1l	244.435	233.377	239.916	201.015	205.005	216.544	0.205199	0.00205583	0.0161093	FALSE	FALSE
Aatf	47.0571	51.3771	48.2877	56.6287	57.3446	57.6906	-0.226357	0.00206136	0.0161413	FALSE	FALSE
Rccd1	9.89909	10.0724	9.52827	13.1092	14.4453	11.5759	-0.407137	0.00206663	0.0161713	FALSE	TRUE
Rb1cc1	56.1851	54.2237	57.1488	48.307	45.0814	49.7007	0.227539	0.00207468	0.0161998	FALSE	FALSE
Tctn2	25.9252	27.5299	23.2682	21.6159	20.8605	18.8737	0.322715	0.00207469	0.0161998	TRUE	FALSE
Tmem121	11.7122	12.7199	11.6341	16.5407	14.8162	14.9102	-0.359261	0.00207605	0.0161998	FALSE	TRUE
Tpst1	53.9552	53.8057	54.7928	67.5188	65.3964	58.9489	-0.239179	0.0020743	0.0161998	FALSE	FALSE
Lyn	16.8597	17.975	16.638	13.438	14.1834	13.1277	0.3373	0.00209425	0.0163305	TRUE	FALSE
Dio3os	5.85609	5.41441	5.44175	4.08893	3.66587	4.13124	0.490747	0.00209669	0.0163382	TRUE	FALSE
Mbd5	25.6126	24.2454	24.5817	19.8488	19.5731	21.6418	0.285573	0.00210316	0.0163772	TRUE	FALSE
Eif3d	430.662	441.971	425.103	512.802	499.474	481.678	-0.203133	0.00210642	0.0163912	FALSE	FALSE
Nqo1	7.12734	8.81832	8.48579	6.45189	5.65154	5.22172	0.49564	0.00211075	0.0164022	TRUE	FALSE
Pigm	56.8312	50.5212	53.5001	68.3818	59.4612	62.8494	-0.245747	0.00211006	0.0164022	FALSE	FALSE
Ahnak	63.9585	55.5176	58.7542	31.1704	23.8063	57.8164	0.659919	0.00213297	0.0165613	TRUE	FALSE
Pm20d1	6.5855	6.96707	7.56841	5.03411	4.866	5.38949	0.465695	0.00213566	0.0165613	TRUE	FALSE
Prr13	18.9229	20.0452	18.6396	23.2186	25.9229	22.3968	-0.312044	0.00213442	0.0165613	FALSE	TRUE
Cdyl	39.2838	41.8621	39.3432	46.5193	45.6706	49.3652	-0.232386	0.00213994	0.016583	FALSE	FALSE
Bnc1	26.4254	28.2863	22.9971	19.6022	21.1005	21.5789	0.319555	0.00214909	0.0166424	TRUE	FALSE
Maf1	82.7981	79.1459	81.4386	67.9092	72.2917	69.1616	0.217256	0.00215315	0.0166624	FALSE	FALSE
Rab32	11.5455	13.1578	5.35835	4.93138	4.42959	7.23492	0.856865	0.00215641	0.0166761	TRUE	FALSE
1190002F15Rik	6.06449	5.97177	6.23403	4.04784	4.93146	3.92154	0.502538	0.00216543	0.0167113	TRUE	FALSE
Ing1	92.3637	94.2346	98.2225	112.456	116.26	104.288	-0.22545	0.00216418	0.0167113	FALSE	FALSE
Sbk1	322.043	321.879	327.401	271.287	299.554	240.262	0.260093	0.00216352	0.0167113	FALSE	FALSE
Klhl21	32.0522	32.586	30.6072	40.1702	36.8114	36.8037	-0.256626	0.00217575	0.0167569	FALSE	FALSE
Pno1	109.515	113.543	111.483	139.003	127.367	123.413	-0.220509	0.00217525	0.0167569	FALSE	FALSE
Tbx3	94.5519	87.5462	109.606	73.0255	75.8485	89.8598	0.289019	0.00217731	0.0167569	TRUE	FALSE
Trmt10c	47.3072	50.8596	49.1217	57.6766	55.4899	58.7811	-0.223293	0.0021767	0.0167569	FALSE	FALSE
Bbs1	22.2573	22.852	23.018	18.205	18.8967	18.7269	0.287302	0.00218153	0.0167664	TRUE	FALSE
Xylb	17.8184	16.3029	16.1584	20.794	20.8387	20.5723	-0.307099	0.00218098	0.0167664	FALSE	TRUE
Atp9a	17.6308	18.9106	17.0758	13.1914	15.0562	14.344	0.332569	0.00219267	0.0168405	TRUE	FALSE
Gmps	249.103	244.683	241.793	283.965	278.955	282.791	-0.20129	0.00219782	0.0168685	FALSE	FALSE
Med7	34.2821	33.4817	31.9208	37.273	39.6917	41.627	-0.25045	0.00220568	0.0169173	FALSE	FALSE
Tspyl1	83.5066	81.7138	83.4818	72.4707	71.8771	70.6505	0.210059	0.00221398	0.0169693	FALSE	FALSE
Mroh1	23.7578	24.2852	27.2296	20.609	20.9478	19.5657	0.300362	0.00222671	0.0170553	TRUE	FALSE
Fam83b	4.39728	4.20015	3.16914	2.7328	2.33481	2.7262	0.593431	0.0022308	0.0170635	TRUE	FALSE
Tiparp	68.5017	63.1216	65.3427	81.0184	67.6439	95.0186	-0.307188	0.00223083	0.0170635	FALSE	TRUE
Lipg	9.56565	8.36048	10.7584	15.1434	13.8779	10.8629	-0.47582	0.00225657	0.0172486	FALSE	TRUE
Rps27a	14.1505	15.4072	15.0534	20.2186	17.5874	18.2865	-0.330492	0.00226088	0.0172698	FALSE	TRUE
Sdc3	93.0306	97.6982	103.331	117.079	122.457	107.203	-0.237698	0.00226765	0.0173098	FALSE	FALSE
Pde2a	44.1812	43.7731	45.3062	37.4785	35.9168	40.0542	0.232032	0.00227046	0.0173194	FALSE	FALSE
Epn3	7.85675	8.67898	8.00625	6.63681	5.12785	5.89279	0.474247	0.00227886	0.0173717	TRUE	FALSE
Arhgap42	65.2506	65.5502	67.1774	56.6903	52.8496	60.312	0.220916	0.00229025	0.0173877	FALSE	FALSE
Cebpa	2.87595	3.22476	2.6062	1.76708	1.98568	1.97125	0.605675	0.00228848	0.0173877	TRUE	FALSE
Fmn2	11.1287	9.4354	10.7375	7.23269	7.68086	8.53511	0.416369	0.0022897	0.0173877	TRUE	FALSE
Rpl27	11.7955	12.9986	11.78	15.2667	15.7327	15.4764	-0.345262	0.00228843	0.0173877	FALSE	TRUE
Rpl9	3.73039	3.56316	3.37764	4.78755	5.08421	5.20075	-0.497719	0.00228689	0.0173877	FALSE	TRUE
Siah2	11.1495	11.9037	12.0511	15.4927	12.8305	18.9156	-0.428529	0.00228645	0.0173877	FALSE	TRUE
Hbegf	5.54349	6.44951	6.10894	8.3217	7.87725	8.45122	-0.445119	0.00229719	0.0174285	FALSE	TRUE
Pfkfb3	61.8537	57.9262	63.5705	70.1283	67.6221	144.51	-0.622436	0.00231269	0.0175343	FALSE	TRUE
Rfk	53.6635	53.1289	48.934	46.4371	41.721	43.5982	0.241013	0.00231749	0.0175588	FALSE	FALSE
Foxn3	25.5709	23.9866	27.0211	20.0132	18.8748	22.9211	0.308757	0.00232631	0.0176137	TRUE	FALSE
Cgn	14.7132	12.899	16.8673	11.3422	12.0013	10.1289	0.409959	0.0023341	0.0176608	TRUE	FALSE
Sfrp2	87.4663	84.839	90.3205	70.9707	80.9545	70.4828	0.239894	0.00234105	0.0177014	FALSE	FALSE
Arl4c	59.0194	58.4637	58.5874	65.6901	65.9201	73.0622	-0.217187	0.00234951	0.0177534	FALSE	FALSE
Robo2	37.0122	39.6725	45.056	20.8556	35.6767	31.9175	0.461126	0.00236114	0.0178293	TRUE	FALSE
Mfng	22.5491	23.4691	21.1207	18.5954	17.522	18.4543	0.29895	0.00236387	0.017838	TRUE	FALSE
Oplah	4.60568	5.35469	5.35835	3.90401	3.57858	3.12465	0.529921	0.00236652	0.0178459	TRUE	FALSE
Hoxb3	35.345	32.7253	30.2111	38.1771	41.9829	38.4814	-0.271455	0.00237216	0.0178764	FALSE	TRUE
Dtx3l	8.06515	8.93775	10.9252	6.08203	7.0917	6.77356	0.485607	0.00237453	0.0178823	TRUE	FALSE
Poc5	34.0737	35.8107	35.5277	42.8619	40.3027	40.9979	-0.236216	0.00238858	0.0179761	FALSE	FALSE
Rbm19	83.5275	83.7641	83.5652	102.881	98.542	91.1809	-0.222094	0.00240099	0.0180573	FALSE	FALSE
Foxred2	18.9854	18.612	18.8897	23.0542	22.9771	22.6904	-0.282851	0.00241687	0.0181524	FALSE	TRUE
Ppif	64.0419	64.9132	63.4871	79.6212	77.7687	69.4342	-0.237119	0.00241634	0.0181524	FALSE	FALSE
Tma16	23.1743	22.3145	22.0589	25.9103	26.2939	29.8204	-0.280178	0.00242059	0.0181682	FALSE	TRUE
Numa1	458.046	420.393	438.822	348.957	330.91	423.4	0.255734	0.00243901	0.0182942	FALSE	FALSE
Ecsit	26.6129	29.0825	29.0018	33.5128	35.1967	32.8402	-0.261588	0.00244174	0.0183025	FALSE	FALSE
Cep41	31.5937	34.696	27.6257	38.7524	41.9392	35.7761	-0.310153	0.00246581	0.0184705	FALSE	TRUE
Ccdc68	3.06351	2.92617	3.27339	1.952	1.76747	2.39067	0.598616	0.00247883	0.0185556	TRUE	FALSE
Mogat2	97.7613	96.9816	107.313	121.908	114.384	115.046	-0.218121	0.00249824	0.0186885	FALSE	FALSE
Simc1	45.7859	43.1361	40.0521	49.0878	48.9218	55.0063	-0.246615	0.00250452	0.018723	FALSE	FALSE
Ppp2r2c	8.52364	11.7445	8.56919	16.1092	13.2233	11.6178	-0.505492	0.00251889	0.0188179	FALSE	TRUE
Ccnb2	141.401	145.532	139.463	126.141	126.385	114.563	0.216096	0.0025277	0.0188711	FALSE	FALSE
Zfp260	137.691	134.106	138.254	117.922	118.617	121.547	0.195476	0.0025574	0.0190802	FALSE	FALSE
Col24a1	6.33542	5.61347	6.15063	3.73963	4.71326	4.40386	0.49367	0.00258393	0.0192653	TRUE	FALSE
Xpot	184.436	191.017	191.233	213.611	205.179	243.009	-0.223862	0.00258763	0.0192801	FALSE	FALSE
Timm10	27.1964	30.1774	28.2721	36.2867	34.8039	32.2531	-0.270852	0.00258985	0.0192838	FALSE	TRUE
Mthfd1	225.949	226.629	221.068	261.26	250.763	261.023	-0.198572	0.00260767	0.0193908	FALSE	FALSE
Myom1	5.35593	4.69779	4.79541	3.47251	2.70576	3.96348	0.548484	0.002606	0.0193908	TRUE	FALSE
Akap1	67.6472	66.9834	65.0299	76.5802	74.8229	79.4163	-0.209233	0.00261997	0.0194693	FALSE	FALSE
Dtd1	21.7988	21.6576	21.1415	27.2253	25.7702	25.0601	-0.273049	0.00263072	0.0195287	FALSE	TRUE
Slc35c2	47.9741	51.8947	47.2869	60.2244	59.3521	54.2724	-0.240356	0.00263145	0.0195287	FALSE	FALSE
Znhit6	52.8507	54.2834	54.063	65.3613	61.1632	60.8572	-0.217199	0.00263963	0.0195765	FALSE	FALSE
Cldn8	2.60502	3.44372	3.64868	1.5616	2.72758	1.42601	0.764533	0.00264748	0.0196218	TRUE	FALSE
Nnt	95.6565	91.2288	98.1391	84.0389	84.0094	75.7884	0.225136	0.0026514	0.0196249	FALSE	FALSE
Sema3g	7.0023	7.50453	8.1522	8.58882	9.79746	15.2877	-0.571416	0.00264969	0.0196249	FALSE	TRUE
Nek7	39.1587	41.046	39.0096	46.4371	49.0964	44.7307	-0.234383	0.0026705	0.0197352	FALSE	FALSE
Phb2	415.72	419.835	415.011	484.076	492.928	458.715	-0.199181	0.00266823	0.0197352	FALSE	FALSE
Rap1gap2	6.7939	7.16613	6.75527	9.04086	8.9901	9.52073	-0.411174	0.00267158	0.0197352	FALSE	TRUE
Tmem41a	29.0095	29.5802	28.2304	36.0196	35.6549	32.3998	-0.261411	0.00269785	0.0199162	FALSE	FALSE
Pprc1	232.952	233.894	230.555	274.02	259.12	267.629	-0.199413	0.00270973	0.0199907	FALSE	FALSE
Nop9	114.183	117.425	111.608	138.757	135.179	124.797	-0.216275	0.00271726	0.0200331	FALSE	FALSE
Sypl	62.9999	62.3055	65.8014	75.9432	70.0879	75.1173	-0.210773	0.00272457	0.0200738	FALSE	FALSE
Plcd1	8.94044	9.19653	9.61167	6.86283	7.37537	6.459	0.423109	0.00273447	0.0201203	TRUE	FALSE
Sec14l1	133.085	132.315	136.482	122.421	114.951	109.845	0.21088	0.00273276	0.0201203	FALSE	FALSE
Anxa5	72.6906	73.5523	76.81	62.9573	65.8983	63.6882	0.212236	0.00274301	0.0201638	FALSE	FALSE
Hoxb7	24.258	24.3648	22.5384	19.5611	19.7477	19.1673	0.28333	0.00274397	0.0201638	TRUE	FALSE
Col26a1	169.493	169.081	172.76	140.75	160.251	128.362	0.252132	0.0027473	0.020175	FALSE	FALSE
Slc4a5	3.87627	4.33949	3.83633	2.58897	1.39652	3.25047	0.733896	0.00275013	0.0201763	TRUE	FALSE
Snhg4	15.6093	15.0091	14.2611	19.3351	19.4422	17.3638	-0.322878	0.00275107	0.0201763	FALSE	TRUE
Ivns1abp	502.457	484.589	471.848	560.636	551.495	555.6	-0.193014	0.00276668	0.0202764	FALSE	FALSE
Plod3	66.7094	59.2798	61.0268	78.45	72.7936	69.1197	-0.236844	0.00276834	0.0202764	FALSE	FALSE
Col27a1	27.8008	23.2103	25.645	30.2252	30.5707	32.0224	-0.276245	0.00277401	0.0202783	FALSE	TRUE
Orc2	133.065	138.426	132.332	158.503	151.501	153.485	-0.198805	0.0027715	0.0202783	FALSE	FALSE
Txnrd1	438.999	431.699	431.754	528.274	512.196	468.026	-0.211882	0.00277285	0.0202783	FALSE	FALSE
Bpnt1	33.8653	33.422	36.1324	48.4508	42.2447	36.8666	-0.302823	0.00278582	0.0203514	FALSE	TRUE
Eif5a	1352.34	1388.26	1372.55	1651.31	1624.33	1479.57	-0.209265	0.00280733	0.0204951	FALSE	FALSE
Krt19	29.2805	30.8343	31.3995	18.9036	17.4565	30.0511	0.462384	0.00282248	0.0205924	TRUE	FALSE
Exosc6	47.2864	48.3116	45.7232	57.7793	57.6937	51.3994	-0.239674	0.00282572	0.0206026	FALSE	FALSE
Panx1	45.2857	47.4557	48.8089	57.6355	57.8901	51.6301	-0.239819	0.00283222	0.0206366	FALSE	FALSE
Fam171a2	62.1871	65.2317	63.8415	52.9301	57.6719	53.832	0.218195	0.00284925	0.0207472	FALSE	FALSE
5330426P16Rik	5.25173	6.09121	5.1707	3.43142	3.05489	4.69745	0.561706	0.00286763	0.0208675	TRUE	FALSE
BC027231	56.2893	54.4626	51.3943	63.1011	59.8976	65.9321	-0.220619	0.00287077	0.0208768	FALSE	FALSE
Vldlr	10.9411	10.3511	12.0511	12.0202	12.6341	50.1411	-1.16543	0.0028759	0.0209006	FALSE	TRUE
Lsm12	39.9298	37.861	38.6552	45.8618	44.7323	45.0452	-0.220214	0.00289765	0.021045	FALSE	FALSE
Galk1	165.429	162.173	160.313	181.002	180.893	199.914	-0.20346	0.00291663	0.0211691	FALSE	FALSE
Mtmr6	40.8051	42.4593	41.449	36.8415	34.3893	35.0422	0.230751	0.00291956	0.0211767	FALSE	FALSE
Gxylt1	100.596	88.422	93.4271	80.9979	77.9869	83.8202	0.218041	0.00294199	0.0213256	FALSE	FALSE
Mapkapk3	8.02347	9.33587	8.29814	5.99984	6.28434	6.68968	0.435615	0.00297275	0.0215347	TRUE	FALSE
Zfp618	29.7806	28.6446	28.7516	19.8899	23.0426	27.0313	0.317408	0.00297856	0.0215629	TRUE	FALSE
Meis1	226.199	213.272	203.784	176.934	187.33	191.925	0.209833	0.00300375	0.0217312	FALSE	FALSE
Mtmr2	89.0501	90.2534	89.4657	100.271	101.75	105.86	-0.195986	0.00301874	0.0217886	FALSE	FALSE
Tmem5	26.738	28.565	27.9176	33.9032	31.2471	33.8049	-0.249884	0.00301945	0.0217886	FALSE	FALSE
Tns3	215.029	214.108	207.183	176.81	162.869	201.739	0.232964	0.00301795	0.0217886	FALSE	FALSE
Wnt11	3.91796	5.35469	4.50352	6.02039	8.05181	6.08153	-0.54732	0.00301397	0.0217886	FALSE	TRUE
Mboat7	40.2841	39.0952	41.4699	45.3687	46.8707	48.4425	-0.219265	0.0030319	0.0218644	FALSE	FALSE
Dnm3os	8.62784	5.17554	5.94214	10.5819	12.9178	7.50754	-0.651013	0.00304617	0.0219532	FALSE	TRUE
Dcaf13	79.1302	80.2009	78.3111	94.4153	87.959	91.6213	-0.205405	0.00304915	0.0219606	FALSE	FALSE
Itga3	103.638	97.1209	105.666	89.4634	81.4564	92.9215	0.2157	0.00305131	0.021962	FALSE	FALSE
Gm7120	4.2514	4.23996	3.25254	8.07513	4.60415	5.62017	-0.640102	0.0030573	0.021991	FALSE	TRUE
Aatk	3.52199	2.80673	3.10659	2.09584	2.09478	2.15999	0.569937	0.00307175	0.0220808	TRUE	FALSE
Slc39a6	120.936	115.295	118.78	135.942	131.273	138.701	-0.193375	0.0030834	0.0221503	FALSE	FALSE
Asrgl1	54.6846	54.1242	55.0638	47.0536	46.4125	48.1489	0.210534	0.00312489	0.0224331	FALSE	FALSE
Capn2	106.598	102.754	102.538	91.3332	92.5849	87.0707	0.202811	0.00312676	0.0224331	FALSE	FALSE
Fmn1	7.16902	6.46942	7.63096	10.3148	8.02999	10.6741	-0.448935	0.00313034	0.0224445	FALSE	TRUE
Ldlr	134.94	120.411	140.401	177.591	163.284	138.743	-0.277343	0.00313311	0.02245	FALSE	TRUE
Ttpa	9.89909	9.35578	9.27808	12.8627	11.4122	12.5405	-0.367945	0.00315419	0.0225866	FALSE	TRUE
Fam19a5	15.6718	14.392	15.4913	18.4927	18.2639	19.398	-0.302002	0.00316099	0.0226208	FALSE	TRUE
Mettl1	36.8246	41.3247	37.842	45.492	46.3252	44.5839	-0.233609	0.00317211	0.0226585	FALSE	FALSE
Pde3a	23.4869	22.0956	22.4133	18.1845	16.7582	20.2368	0.300965	0.00317432	0.0226585	TRUE	FALSE
Rpl22l1	68.1266	70.5863	66.9481	80.8335	80.6272	76.795	-0.212174	0.00317341	0.0226585	FALSE	FALSE
Srd5a1	20.1316	19.2291	21.2875	17.0954	16.6055	15.2458	0.309047	0.00317121	0.0226585	TRUE	FALSE
Ttc19	18.9854	18.1144	19.0565	23.1775	21.7552	23.1937	-0.278997	0.00318885	0.0227477	FALSE	TRUE
Car4	4.85576	4.91676	6.35913	2.91773	3.25127	4.55066	0.589025	0.003199	0.0228056	TRUE	FALSE
Rrp15	87.8831	91.6468	89.7993	106.127	102.906	100.471	-0.200573	0.00320604	0.0228412	FALSE	FALSE
Zc3hav1l	177.913	169.399	175.554	148.311	144.322	161.643	0.202819	0.0032225	0.022944	FALSE	FALSE
Zfp354c	68.7935	67.3019	66.9272	56.2999	55.1407	63.2688	0.216599	0.00326753	0.0232498	FALSE	FALSE
Cinp	59.8947	59.9367	60.6724	72.0598	72.8591	65.324	-0.219989	0.0032731	0.0232747	FALSE	FALSE
Gpr97	12.2123	10.3312	11.1545	8.73265	8.59733	8.51414	0.382423	0.00328332	0.0233326	TRUE	FALSE
Elf3	5.46013	5.83243	6.56763	4.17112	4.73508	3.75377	0.496714	0.00329375	0.0233771	TRUE	FALSE
Trib2	28.0926	29.1024	26.4582	34.1498	32.7746	32.5676	-0.250067	0.00329199	0.0233771	FALSE	FALSE
Vasp	125.166	134.345	129.142	151.475	149.58	144.971	-0.198606	0.00331338	0.0235015	FALSE	FALSE
Clgn	1.41713	2.0105	2.33516	2.67116	3.22945	3.10367	-0.642294	0.00331806	0.0235199	FALSE	TRUE
Ptgs1	5.39761	4.89685	4.79541	3.63689	3.68769	3.46018	0.484274	0.00332113	0.0235237	TRUE	FALSE
Sppl2b	35.3866	35.2136	35.8196	43.1906	43.5758	38.9427	-0.240276	0.00332279	0.0235237	FALSE	FALSE
Ppp3ca	48.245	50.2823	49.2468	39.6154	41.8301	45.0033	0.224924	0.00332936	0.0235553	FALSE	FALSE
Crebzf	56.6019	54.2635	53.2916	61.0463	62.0797	66.9597	-0.211585	0.00333548	0.0235689	FALSE	FALSE
Tie1	92.718	93.2592	90.6541	79.5596	80.3436	81.2827	0.197837	0.00333374	0.0235689	FALSE	FALSE
Enoph1	56.6019	57.9063	58.3789	67.19	66.6184	65.2191	-0.203122	0.00335015	0.02365	FALSE	FALSE
Ppp2r1b	199.795	197.646	197.175	237.405	236.405	214.321	-0.210719	0.00335117	0.02365	FALSE	FALSE
Map1lc3a	21.2778	22.1155	20.2867	17.1776	18.613	14.9102	0.32913	0.00337212	0.0237829	TRUE	FALSE
Ptger1	13.7128	14.1332	14.6781	18.0612	20.0968	15.8749	-0.345244	0.00337511	0.023789	FALSE	TRUE
Dhx57	54.9347	55.0996	51.5402	46.9097	45.7142	46.4712	0.216122	0.00338369	0.0238346	FALSE	FALSE
Tmem147	36.5745	39.0554	37.1749	46.6632	43.9686	42.0883	-0.234511	0.00338798	0.0238497	FALSE	FALSE
Nufip1	60.2698	61.2903	56.3982	68.1352	67.4694	69.8327	-0.2071	0.00339974	0.0239175	FALSE	FALSE
Zc3h15	148.924	156.162	150.764	179.893	173.234	170.115	-0.198908	0.00340979	0.0239732	FALSE	FALSE
Pkm	2372.18	2385.5	2339.06	2616.4	2647.89	2809.41	-0.186075	0.00343763	0.0241538	FALSE	FALSE
Ccnl2	86.8411	84.0427	85.1498	93.7989	101.531	98.8562	-0.200345	0.00344867	0.0242162	FALSE	FALSE
Qtrt1	42.8891	42.937	44.1178	50.1357	50.9948	49.491	-0.213016	0.00346044	0.0242836	FALSE	FALSE
Vill	14.1922	14.8498	14.4279	11.3627	12.3287	10.3596	0.352615	0.00347462	0.024368	TRUE	FALSE
Stt3a	211.778	195.894	204.618	236.665	223.814	242.674	-0.199673	0.00347823	0.024378	FALSE	FALSE
5430416N02Rik	13.692	12.8393	11.363	13.5202	16.6055	22.6694	-0.478233	0.00353596	0.0247672	FALSE	TRUE
Rbfa	26.4879	29.3612	25.3323	32.5471	34.913	30.8061	-0.275166	0.00354373	0.0248061	FALSE	TRUE
Isy1	107.119	108.189	109.315	126.346	127.367	118.967	-0.199158	0.00356113	0.0249123	FALSE	FALSE
Gng11	26.0711	27.1517	24.394	20.9584	21.6679	21.8725	0.267277	0.00359284	0.0251186	TRUE	FALSE
Lrrc17	10.7119	10.7691	10.9043	8.40389	7.87725	8.8287	0.366724	0.0035953	0.0251201	TRUE	FALSE
Klhdc10	266.254	259.513	247.777	282.897	297.372	309.927	-0.202623	0.00361629	0.025251	FALSE	FALSE
Adamts5	24.8207	18.9703	22.6635	17.4447	13.2233	19.4399	0.406666	0.0036248	0.0252947	TRUE	FALSE
Grb10	2371.65	2205.02	2250.99	1896.83	1825.34	2165.51	0.213687	0.00363781	0.0253382	FALSE	FALSE
Hoxb8	52.3714	45.1466	43.9718	38.6497	42.8775	32.9031	0.306315	0.00363689	0.0253382	TRUE	FALSE
Ptprf	475.156	451.585	475.642	388.182	379.875	444.706	0.209562	0.00363729	0.0253382	FALSE	FALSE
Dusp12	37.1997	38.3786	35.5069	44.0536	42.4411	43.053	-0.221759	0.00364739	0.0253832	FALSE	FALSE
Vdac2	211.257	217.452	211.874	252.158	248.45	235.292	-0.200111	0.00364879	0.0253832	FALSE	FALSE
Pced1a	33.3026	28.7441	33.1717	37.0264	41.9829	36.2165	-0.275153	0.00366689	0.0254775	FALSE	TRUE
Polr1d	77.9006	79.2852	80.1042	95.1345	91.0793	87.6369	-0.206757	0.00366468	0.0254775	FALSE	FALSE
Gfm2	69.4603	70.7655	66.8647	79.5801	79.9508	79.0389	-0.204088	0.00367527	0.02552	FALSE	FALSE
B4galt6	74.2119	75.7619	71.0555	61.971	60.8359	68.197	0.210622	0.00368779	0.0255911	FALSE	FALSE
Taf1a	17.86	16.7409	17.5554	20.6707	22.4098	20.6352	-0.288715	0.00369467	0.0256229	FALSE	TRUE
B4galnt1	5.71021	5.97177	6.73442	7.84911	7.94271	9.08035	-0.433556	0.00371831	0.0257709	FALSE	TRUE
Cct8	915.53	890.73	898.952	1069.49	1014	999.824	-0.188749	0.00372477	0.0257998	FALSE	FALSE
Slc2a4	16.7138	16.9001	14.8866	12.575	13.5506	12.2469	0.338217	0.00372981	0.0258188	TRUE	FALSE
Ctsf	5.81441	5.53384	5.27495	3.88346	3.46948	4.52969	0.483508	0.0037355	0.0258422	TRUE	FALSE
Mpped1	5.56433	5.55375	6.21318	4.62317	4.05864	3.7328	0.480541	0.00374448	0.0258884	TRUE	FALSE
Dhrs1	42.1805	42.3001	42.2622	35.1772	38.8625	32.4837	0.250927	0.00374809	0.0258957	FALSE	FALSE
Tmem70	48.2867	48.9287	44.1803	58.2724	55.8608	52.2382	-0.234608	0.00375016	0.0258957	FALSE	FALSE
Hddc2	44.1187	48.8889	44.0135	60.1628	58.152	48.0231	-0.279593	0.00375507	0.0259137	FALSE	TRUE
Commd3	43.6602	47.4159	43.8259	38.6497	39.5826	36.7827	0.230262	0.00375947	0.0259281	FALSE	FALSE
Zfp629	146.236	137.908	144.592	123.079	124.705	128.299	0.189002	0.00377348	0.0260087	FALSE	FALSE
2410006H16Rik	37.9917	39.0156	34.5687	40.5811	42.0483	78.6824	-0.531801	0.00379149	0.0261168	FALSE	TRUE
Ctdsp1	102.805	104.506	104.123	93.4496	90.8611	87.2594	0.197587	0.00382012	0.0262979	FALSE	FALSE
Cenpf	243.934	200.413	227.448	155.03	134.524	222.164	0.39262	0.00382851	0.0263107	TRUE	FALSE
Mrpl15	98.97	99.9874	96.075	113.874	112.682	111.082	-0.194579	0.00383136	0.0263107	FALSE	FALSE
Pogk	122.749	116.887	120.552	106.641	104.172	104.351	0.192598	0.00383058	0.0263107	FALSE	FALSE
Zhx2	16.2553	15.4271	17.7013	18.6981	21.2751	21.2015	-0.308855	0.00382797	0.0263107	FALSE	TRUE
B3gnt5	85.9241	82.8882	85.2749	96.1002	90.5556	109.698	-0.222086	0.00383576	0.0263248	FALSE	FALSE
Lin7c	132.064	131.2	129.393	149.893	141.965	156.505	-0.191438	0.00385055	0.0264102	FALSE	FALSE
Hmbox1	37.5957	36.6468	38.2382	26.9787	24.4609	36.8037	0.349898	0.00386971	0.0264769	TRUE	FALSE
Klf16	37.3039	39.5729	37.6752	45.3276	45.256	43.053	-0.222181	0.00386953	0.0264769	FALSE	FALSE
Klhl36	6.71054	7.0865	6.23403	5.1574	4.60415	4.9491	0.445021	0.00386772	0.0264769	TRUE	FALSE
Spint1	18.1935	19.6073	18.5562	15.164	15.6454	15.078	0.296687	0.00386486	0.0264769	TRUE	FALSE
Coq2	46.0151	47.7145	44.9935	56.0739	53.897	51.651	-0.220365	0.0038871	0.0265634	FALSE	FALSE
Stxbp4	80.3806	74.3685	76.7474	65.5257	62.9743	71.1748	0.213204	0.00388555	0.0265634	FALSE	FALSE
Eaf1	119.123	126.98	122.533	142.126	134.066	146.02	-0.195778	0.00391783	0.0267408	FALSE	FALSE
Phactr2	70.2523	67.8791	69.1165	58.9916	57.0391	63.8141	0.204489	0.00391691	0.0267408	FALSE	FALSE
Marveld2	6.71054	6.96707	7.48501	5.67108	4.93146	4.99104	0.439885	0.0039448	0.0269086	TRUE	FALSE
Antxr2	41.597	42.8972	44.2429	47.3001	50.2965	51.9866	-0.21644	0.00395468	0.0269596	FALSE	FALSE
Emc4	39.1796	39.6128	40.344	47.6289	46.4779	44.3742	-0.217089	0.00399085	0.0271896	FALSE	FALSE
Tbx1	7.1065	6.70829	5.98384	4.49988	4.73508	5.20075	0.455694	0.00400695	0.0272827	TRUE	FALSE
Psme3	340.779	340.63	335.637	396.113	391.44	373.636	-0.191216	0.00402426	0.027384	FALSE	FALSE
Angpt2	19.5689	20.1647	19.4735	16.479	11.5431	17.1541	0.389619	0.0040398	0.0274731	TRUE	FALSE
2410004N09Rik	14.2338	14.1133	13.4271	15.5749	17.6092	19.4609	-0.333435	0.00404253	0.027475	FALSE	TRUE
Cpped1	26.1961	29.1821	26.9585	22.9104	23.7845	21.5789	0.270458	0.00405411	0.027537	TRUE	FALSE
Ece2	29.6139	34.0192	32.6713	39.9442	38.6007	36.3424	-0.254404	0.0040666	0.0276051	FALSE	FALSE
Nlgn2	58.5818	55.2588	59.5673	44.2591	51.0603	52.2592	0.232755	0.00407864	0.0276622	FALSE	FALSE
Rsl24d1	51.9337	52.6909	51.853	63.6764	59.5267	58.0891	-0.2124	0.00407993	0.0276622	FALSE	FALSE
Sema7a	2.45914	2.94607	2.5645	3.24649	4.1241	4.27804	-0.545802	0.00408271	0.0276643	FALSE	TRUE
Rab15	21.9447	21.9761	23.7477	19.3968	18.3293	17.909	0.282269	0.00409762	0.0277486	TRUE	FALSE
Slc25a25	35.1782	34.1784	34.2351	42.5331	39.3644	39.2992	-0.226574	0.0041196	0.0278806	FALSE	FALSE
Kcna6	12.1498	11.9435	11.0294	9.41071	8.42276	9.39491	0.366937	0.0041305	0.0279375	TRUE	FALSE
Sars	182.143	189.882	187.521	201.55	204.896	277.003	-0.288574	0.00416105	0.0281272	FALSE	TRUE
Dnajc11	182.748	181.283	175.47	211.433	215.501	194.881	-0.204835	0.0041811	0.0282268	FALSE	FALSE
Eya2	7.81507	8.26095	8.77769	6.51353	6.1316	6.01861	0.412897	0.0041786	0.0282268	TRUE	FALSE
Mrpl32	30.2183	32.2476	32.2335	37.3963	36.2222	37.4328	-0.229782	0.00418334	0.0282268	FALSE	FALSE
Larp1	326.17	329.025	322.231	371.785	344.395	418.723	-0.215528	0.00418984	0.0282367	FALSE	FALSE
Rpn2	335.631	325.024	337.347	392.579	380.945	366.38	-0.191811	0.00418861	0.0282367	FALSE	FALSE
Fermt2	172.765	173.58	171.321	196.639	193.593	198.342	-0.185202	0.00419548	0.0282578	FALSE	FALSE
Timm17a	43.9311	47.8339	49.1634	54.9643	55.8826	53.4335	-0.221116	0.00421757	0.0283895	FALSE	FALSE
Serbp1	1118.26	1115.43	1102.49	1265	1248.21	1261.2	-0.178056	0.00422067	0.0283934	FALSE	FALSE
Amph	25.0499	26.3355	23.435	19.3968	20.5769	21.7677	0.277401	0.00425045	0.0285766	TRUE	FALSE
Bcl7b	26.8838	28.8835	27.6466	32.9991	33.8002	31.8336	-0.241576	0.00428113	0.0287656	FALSE	FALSE
Zfp651	25.8418	25.8976	26.208	20.794	23.1735	20.8869	0.26553	0.00428896	0.028801	TRUE	FALSE
Itgb1	387.753	378.61	383.445	433.057	423.495	446.866	-0.180918	0.00430764	0.0289091	FALSE	FALSE
Cul7	226.012	221.314	227.761	194.563	191.651	205.87	0.189244	0.00432572	0.0290129	FALSE	FALSE
Supv3l1	56.2477	56.1148	54.9387	63.697	64.1963	63.7721	-0.196107	0.00432828	0.0290129	FALSE	FALSE
Tmem69	23.1118	23.3894	22.5176	28.8897	27.9522	25.8779	-0.261188	0.00433842	0.0290635	FALSE	FALSE
Cs	433.205	428.315	428.147	507.85	485.465	474.464	-0.186643	0.00435999	0.0291906	FALSE	FALSE
Map1a	24.5289	22.4539	20.6411	16.1297	15.9945	21.0547	0.346516	0.00437174	0.0292518	TRUE	FALSE
Bdh1	11.1495	13.5758	12.3221	17.5475	15.6672	14.4908	-0.364557	0.00438015	0.0292906	FALSE	TRUE
Mmp14	121.457	118.938	124.43	103.867	112.987	97.1157	0.21663	0.00438286	0.0292913	FALSE	FALSE
Ccrn4l	24.3622	25.38	24.3523	29.1568	27.6686	31.3933	-0.251738	0.00440455	0.0294187	FALSE	FALSE
Tada2a	59.2695	56.8712	55.2723	64.1079	66.6184	66.1628	-0.199861	0.00441362	0.0294618	FALSE	FALSE
Manba	5.27257	4.61817	5.90044	4.23277	3.09853	3.71183	0.514131	0.00441995	0.0294865	TRUE	FALSE
Bbs9	18.8812	20.0452	19.5152	15.9242	16.1254	15.9588	0.283799	0.00442735	0.0295071	TRUE	FALSE
Marf1	137.858	118.659	128.934	110.545	100.331	118.758	0.225545	0.00443093	0.0295071	FALSE	FALSE
Zeb1	108.64	106.616	108.043	122.113	113.38	146.04	-0.239003	0.00442879	0.0295071	FALSE	FALSE
Rab27b	3.62619	4.75751	4.58691	3.24649	2.57483	3.14562	0.531662	0.00444299	0.0295699	TRUE	FALSE
Canx	556.746	515.762	564.441	651.497	601.9	620.274	-0.194882	0.0044542	0.0296269	FALSE	FALSE
Ppp5c	149.466	154.51	156.998	177.119	178.929	170.576	-0.192073	0.00447581	0.029753	FALSE	FALSE
Clic1	166.763	179.193	174.803	154.989	155.276	139.854	0.210341	0.0044884	0.0297904	FALSE	FALSE
Crip2	50.2248	57.9859	54.6885	46.9508	46.0197	46.4503	0.22462	0.0044894	0.0297904	FALSE	FALSE
Pycr2	83.0481	94.4137	87.2556	105.901	105.852	96.6543	-0.220283	0.00448613	0.0297904	FALSE	FALSE
Zfp41	159.74	153.912	163.607	140.626	141.943	135.324	0.191617	0.00450245	0.0298593	FALSE	FALSE
Specc1l	175.474	168.026	178.348	144.037	144.671	164.327	0.203965	0.00450797	0.0298783	FALSE	FALSE
Mrvi1	3.70955	3.92146	3.56528	2.7739	2.59665	2.49552	0.508917	0.00452556	0.0299772	TRUE	FALSE
Pycard	2.7509	2.90626	3.08574	2.01365	2.18206	1.7196	0.563682	0.00453241	0.0300048	TRUE	FALSE
Kctd21	6.1687	6.15093	6.46338	4.41769	4.84418	4.65551	0.432596	0.00453837	0.0300089	TRUE	FALSE
Tmem201	91.5301	89.0789	90.2163	101.175	105.154	102.274	-0.188369	0.00453665	0.0300089	FALSE	FALSE
Noc4l	94.4686	93.2393	92.1761	111.141	109.059	101.394	-0.200409	0.00454234	0.0300174	FALSE	FALSE
Plcd3	3.75123	4.16033	4.10737	2.85609	2.66212	3.01979	0.492754	0.0045463	0.0300259	TRUE	FALSE
Mal2	2.31326	3.44372	3.48188	1.29449	2.50937	1.82446	0.716876	0.00455584	0.0300712	TRUE	FALSE
Heatr5b	39.2629	34.6164	35.6111	28.4582	26.643	34.5808	0.287651	0.00455993	0.0300805	TRUE	FALSE
Ankrd29	2.52166	2.38871	2.04326	4.06839	3.33856	2.93591	-0.572584	0.0045736	0.0301468	FALSE	TRUE
Col18a1	496.997	494.065	504.748	430.448	412.213	468.068	0.19054	0.00457535	0.0301468	FALSE	FALSE
Eif2s1	193.001	202.085	197.279	227.542	221.152	226.233	-0.188239	0.00459266	0.0302431	FALSE	FALSE
Pgp	42.3056	41.464	40.9069	49.7247	49.2055	45.926	-0.216417	0.00460641	0.0302981	FALSE	FALSE
Snx29	7.91927	8.36048	8.00625	5.09576	5.41152	7.13006	0.461373	0.00460547	0.0302981	TRUE	FALSE
Cherp	208.173	200.831	200.386	230.932	233.328	229.546	-0.18717	0.00461746	0.0302997	FALSE	FALSE
Etnk1	105.535	104.844	105.979	93.7784	88.5045	95.2493	0.18882	0.00461307	0.0302997	FALSE	FALSE
Pcmtd1	19.7357	18.6518	19.3276	13.4791	15.0562	17.5525	0.32455	0.00461199	0.0302997	TRUE	FALSE
Timm10b	25.9252	26.9725	25.4782	31.9101	30.8325	30.0511	-0.243538	0.00461724	0.0302997	FALSE	FALSE
Rnmt	103.263	100.206	99.9322	116.586	112.376	116.702	-0.188186	0.00464684	0.0304714	FALSE	FALSE
Slc52a2	23.5077	24.8426	23.8937	29.4239	29.0433	27.4507	-0.249951	0.00464905	0.0304714	FALSE	FALSE
Parp8	17.8184	18.3532	17.4094	20.6707	20.5332	24.4939	-0.294077	0.00467832	0.0306453	FALSE	TRUE
Pcgf5	3.9388	5.07601	5.60854	2.99992	2.8585	4.04736	0.56133	0.00469943	0.0307656	TRUE	FALSE
Hif3a	20.0899	22.434	19.8905	13.0887	14.9253	19.7335	0.386578	0.00471752	0.0308661	TRUE	FALSE
Hoxd1	12.4208	11.3464	15.0117	8.26006	9.49197	11.1145	0.425649	0.00473345	0.0309523	TRUE	FALSE
Pml	54.6846	53.746	53.3333	47.5878	47.9617	43.7031	0.21621	0.00473716	0.0309585	FALSE	FALSE
Rnf165	26.988	25.9175	26.3748	29.8759	28.9342	39.4041	-0.309085	0.00474705	0.031005	FALSE	TRUE
Ptcd3	145.214	140.695	137.566	163.537	155.472	163.257	-0.187586	0.00475111	0.0310135	FALSE	FALSE
Adamts6	7.69003	6.66848	7.00547	4.31496	4.05864	6.43803	0.527683	0.00475579	0.0310165	TRUE	FALSE
Grik5	49.9956	45.5248	49.6846	38.999	45.1687	38.2297	0.246636	0.00476338	0.0310165	FALSE	FALSE
Kcnmb4	6.54382	6.50923	6.69272	4.767	5.47698	3.96348	0.475265	0.00476539	0.0310165	TRUE	FALSE
Klhl2	28.0509	28.5849	30.2945	34.3347	31.749	37.1183	-0.247724	0.0047583	0.0310165	FALSE	FALSE
Nufip2	75.2122	73.1542	74.7041	84.1827	79.6017	96.172	-0.220856	0.00476516	0.0310165	FALSE	FALSE
Crcp	45.8692	48.3514	48.6213	56.5465	54.3552	54.1465	-0.208469	0.00478359	0.0311169	FALSE	FALSE
Tmem106c	22.2365	22.4141	22.2257	17.0543	19.9222	17.8671	0.286512	0.00479634	0.0311818	TRUE	FALSE
Ankrd13b	95.0104	85.8542	90.0286	105.408	116.108	96.6753	-0.232135	0.00480309	0.0312076	FALSE	FALSE
Pias1	46.9529	42.6185	48.8089	40.0058	37.0296	41.1237	0.227587	0.00483925	0.0314243	FALSE	FALSE
Akna	40.68	40.4687	40.0521	28.6225	30.2216	39.6348	0.299472	0.00485377	0.031464	TRUE	FALSE
B3gnt3	2.93847	4.16033	3.16914	2.11638	2.55301	2.2229	0.576406	0.00485123	0.031464	TRUE	FALSE
Cwf19l1	34.5947	34.0391	35.4652	38.4442	40.3027	42.4449	-0.219326	0.00485205	0.031464	FALSE	FALSE
Rbm28	150.383	144.995	148.533	170.215	168.935	165.627	-0.185397	0.00487596	0.0315896	FALSE	FALSE
Fras1	42.7849	39.1748	39.6351	23.7939	22.7153	41.2076	0.471013	0.00488007	0.0315903	TRUE	FALSE
Mpdu1	52.6632	55.6569	52.3325	60.9847	65.331	59.7457	-0.211643	0.00488171	0.0315903	FALSE	FALSE
Col6a1	8.83624	8.40029	8.88193	6.24641	6.21888	7.27686	0.403405	0.00490932	0.0317507	TRUE	FALSE
Creld2	52.3089	49.8444	54.9804	69.6557	63.7381	54.7757	-0.260137	0.0049243	0.0318292	FALSE	FALSE
Fkbp11	9.37808	9.79371	9.31978	12.1435	13.4415	11.1774	-0.367209	0.00493717	0.0318941	FALSE	TRUE
Hoxc8	27.1964	23.051	21.8921	20.9378	18.0893	19.1673	0.309531	0.00496986	0.0320868	TRUE	FALSE
Pelo	42.8057	43.8925	42.0328	53.0945	50.5802	46.6809	-0.22399	0.00497669	0.0321124	FALSE	FALSE
Iars	263.691	248.903	248.152	284.088	268.045	372.818	-0.281981	0.00499137	0.0321886	FALSE	TRUE
Kif1c	170.098	165.378	174.407	151.886	149.93	145.852	0.187709	0.00500951	0.032287	FALSE	FALSE
Coq3	19.173	20.4832	19.8905	25.7459	23.4135	22.8791	-0.274764	0.00502755	0.0323847	FALSE	TRUE
Cep112	12.0873	11.9236	13.3646	8.48608	8.3573	11.3662	0.40553	0.00504122	0.0324541	TRUE	FALSE
Aldh1l2	2.31326	2.32899	3.18999	1.70543	2.6403	23.9277	-1.85102	0.00504751	0.032476	FALSE	TRUE
Ttc39b	2.70922	3.22476	2.6479	3.47251	3.79679	5.62017	-0.585828	0.00505203	0.0324865	FALSE	TRUE
Fkbp1a	331.797	338.201	337.055	397.14	392.946	362.438	-0.194651	0.0050562	0.0324946	FALSE	FALSE
Cers5	54.9973	57.6674	57.6283	64.9503	63.8253	66.0579	-0.194211	0.00507183	0.0325749	FALSE	FALSE
Rpl34	10.5868	10.5899	12.4264	15.164	14.969	12.9599	-0.358933	0.00507449	0.0325749	FALSE	TRUE
Sapcd2	37.6374	37.7814	35.4443	41.629	48.1145	41.3753	-0.24181	0.00508697	0.0326363	FALSE	FALSE
Cxxc4	8.66952	8.49982	7.71436	5.52725	6.45891	6.64774	0.41759	0.00510025	0.0326975	TRUE	FALSE
Leng1	12.2957	13.3967	13.1353	15.9242	16.4528	15.791	-0.310715	0.00510234	0.0326975	FALSE	TRUE
Dph7	31.4895	30.7745	28.6474	32.6498	38.0552	37.6425	-0.252875	0.00512836	0.0328291	FALSE	FALSE
Plch1	12.1915	10.4108	9.63252	14.5887	13.9434	13.0858	-0.368652	0.00512873	0.0328291	FALSE	TRUE
Ola1	136.149	134.803	137.983	161.194	156.541	148.997	-0.190745	0.005151	0.0329529	FALSE	FALSE
Ccdc86	80.193	86.113	84.5452	101.237	97.8655	90.7196	-0.208302	0.00515743	0.0329565	FALSE	FALSE
Tnrc6c	110.849	109.423	115.194	94.066	89.4428	106.448	0.210239	0.00515686	0.0329565	FALSE	FALSE
Ciart	6.06449	5.07601	6.48423	6.78064	7.46265	12.5405	-0.603915	0.00518878	0.0331225	FALSE	TRUE
Krtcap2	57.769	61.4296	57.816	70.2105	68.5168	65.2401	-0.204394	0.00518932	0.0331225	FALSE	FALSE
Dus4l	16.9431	17.0793	16.3878	20.0337	20.7732	20.1739	-0.274455	0.00521071	0.0332296	FALSE	TRUE
Scnn1a	3.75123	4.45892	3.29424	2.65062	2.57483	2.76814	0.525467	0.00521202	0.0332296	TRUE	FALSE
Rnf44	302.641	287.362	297.983	333.978	333.005	338.762	-0.179671	0.00522119	0.0332692	FALSE	FALSE
Naaa	35.9702	35.5918	36.1115	43.1085	43.2703	39.3831	-0.224002	0.00523206	0.0333195	FALSE	FALSE
Slit2	41.5762	34.1784	36.6536	27.8212	30.3307	34.476	0.279119	0.0052812	0.0336133	TRUE	FALSE
Eif4a2	160.011	150.986	146.197	161.996	175.809	191.17	-0.21037	0.00529064	0.0336543	FALSE	FALSE
Fkbp5	148.007	145.393	141.84	166.352	162.913	164.788	-0.182863	0.0052983	0.033684	FALSE	FALSE
Zeb2	25.7376	24.0662	24.811	18.3694	17.9147	23.7389	0.313705	0.00531191	0.0337514	TRUE	FALSE
Flrt3	100.825	88.4619	89.424	77.5665	68.5386	88.0773	0.250983	0.00531636	0.0337605	FALSE	FALSE
Hoxa9	96.9902	87.8647	84.4618	105.162	111.46	97.7238	-0.22301	0.00534536	0.0339255	FALSE	FALSE
Gimap1	8.69036	8.79841	8.96533	7.04776	6.37162	6.79453	0.387675	0.00535062	0.0339397	TRUE	FALSE
Fnip1	26.4879	26.3952	29.6064	21.4309	21.6024	25.2488	0.27252	0.00537078	0.0340191	TRUE	FALSE
Slc7a6os	50.0164	47.5154	47.8499	56.0944	56.4281	54.7547	-0.202415	0.00536842	0.0340191	FALSE	FALSE
Ttc30b	3.48031	2.96598	2.8564	2.17803	2.18206	2.05514	0.535428	0.00537224	0.0340191	TRUE	FALSE
Notch3	199.191	174.396	191.42	138.983	144.933	185.424	0.2676	0.00538291	0.0340675	TRUE	FALSE
Nav3	2.3341	3.10532	2.46025	1.39722	1.50562	2.20193	0.629912	0.00539925	0.0341324	TRUE	FALSE
Sppl2a	57.1855	57.4684	53.5418	47.0741	46.7398	51.6091	0.209881	0.00539732	0.0341324	FALSE	FALSE
Rrm2	497.872	489.267	515.611	613.135	625.619	518.712	-0.225888	0.00540348	0.0341399	FALSE	FALSE
Chmp2b	49.2245	51.2577	48.5587	43.4989	42.4629	43.4724	0.203506	0.00540814	0.0341501	FALSE	FALSE
Tenm2	2.85511	2.52805	3.50273	0.945181	1.33106	2.70523	0.833653	0.00543582	0.0343056	TRUE	FALSE
Bloc1s1	36.0327	36.4875	40.7401	31.9718	33.9311	28.3735	0.264732	0.0054441	0.0343385	TRUE	FALSE
Taf4b	14.9007	16.2034	16.1584	19.4789	17.762	20.782	-0.296007	0.00544733	0.0343396	FALSE	TRUE
Ext1	104.764	106.656	110.92	121.764	120.144	124.105	-0.183337	0.00545952	0.0343962	FALSE	FALSE
Pcsk4	2.16738	2.12993	2.33516	2.95883	2.90214	3.77474	-0.538863	0.00546244	0.0343962	FALSE	TRUE
Fmnl3	98.0948	98.8527	104.415	114.613	119.272	111.124	-0.195112	0.00547506	0.0344564	FALSE	FALSE
Trappc5	60.5616	63.6591	61.1728	70.9502	71.288	69.7069	-0.193018	0.00549439	0.0345586	FALSE	FALSE
Ttc28	94.406	85.5954	91.0919	67.4982	66.6838	89.5872	0.276688	0.00551599	0.0346751	TRUE	FALSE
Naf1	34.6989	32.586	31.3995	38.6291	35.8077	42.319	-0.242751	0.00552002	0.0346809	FALSE	FALSE
Card6	5.68937	4.27977	5.31665	3.41087	3.31674	4.0893	0.497706	0.00558356	0.0350605	TRUE	FALSE
Gpalpp1	73.6075	69.5114	69.7211	62.5463	59.6794	63.898	0.193386	0.00560197	0.0351518	FALSE	FALSE
Shroom3	111.87	100.206	94.97	115.559	113.096	129.495	-0.222146	0.00560436	0.0351518	FALSE	FALSE
Lap3	191.355	193.247	193.964	221.357	216.068	218.432	-0.180909	0.00561276	0.0351848	FALSE	FALSE
Trip13	94.7395	97.9968	94.9074	111.387	108.601	107.601	-0.187589	0.00562052	0.0352138	FALSE	FALSE
Kif3a	57.5814	56.5328	57.5032	48.3686	49.6637	51.7139	0.196664	0.00562473	0.0352205	FALSE	FALSE
Snap47	93.5516	92.4231	93.9275	82.1074	84.4022	77.8855	0.195733	0.00563199	0.0352463	FALSE	FALSE
Spata5l1	12.1081	13.9341	12.4264	16.253	15.9072	15.77	-0.316912	0.00568918	0.0355843	FALSE	TRUE
Man1c1	36.8246	35.7112	39.1347	31.7252	28.3886	34.1195	0.244601	0.00569907	0.0356263	FALSE	FALSE
Gdnf	9.89909	11.4459	12.1136	2.71226	10.1248	5.28464	0.885272	0.00572044	0.0357273	TRUE	FALSE
Setd6	13.9629	13.6555	13.4688	16.2735	17.8929	16.483	-0.301594	0.00572159	0.0357273	FALSE	TRUE
Twistnb	34.032	34.5965	33.8598	39.0401	38.4261	41.3544	-0.213327	0.00573131	0.0357681	FALSE	FALSE
Enho	18.3394	17.6565	15.7832	13.7051	15.1435	11.5339	0.358913	0.00573491	0.0357707	TRUE	FALSE
Maf	4.29308	3.92146	3.77378	2.40405	3.36038	2.55843	0.52749	0.00574992	0.0358245	TRUE	FALSE
Tfb1m	21.9864	22.1354	21.2249	17.5475	18.853	17.8881	0.267669	0.00574967	0.0358245	TRUE	FALSE
Habp4	20.0274	21.1202	19.8905	15.5955	18.1548	16.1056	0.292385	0.0057649	0.0358979	TRUE	FALSE
1810011O10Rik	20.3817	19.7666	18.8272	15.0818	15.6454	17.5735	0.288058	0.00577902	0.0359658	TRUE	FALSE
Lypd6b	7.91927	7.46472	7.65181	5.65054	5.04057	6.52191	0.41964	0.00578439	0.0359793	TRUE	FALSE
Gstm2	7.1065	7.58415	8.17305	5.62999	6.1316	5.41046	0.413153	0.00580121	0.0360041	TRUE	FALSE
Hoxc6	24.3413	20.523	19.828	17.7324	17.4129	17.5106	0.296803	0.00579531	0.0360041	TRUE	FALSE
Mast4	57.0396	49.8245	53.3333	36.2662	35.0003	53.8949	0.355916	0.00579487	0.0360041	TRUE	FALSE
Myo9a	58.811	57.4086	56.9611	41.814	39.7135	58.0261	0.311347	0.00579926	0.0360041	TRUE	FALSE
Arfrp1	46.5361	47.4557	48.2043	56.2793	55.9263	52.0704	-0.208214	0.00581872	0.0360331	FALSE	FALSE
B4galt4	24.2371	24.4245	24.8944	19.931	21.9079	19.3351	0.266138	0.00581493	0.0360331	TRUE	FALSE
Slc39a3	25.0291	23.1108	25.374	21.0611	20.6423	19.5657	0.262645	0.00581723	0.0360331	FALSE	FALSE
Wars2	30.6559	33.7405	33.1926	26.8349	26.1848	29.5478	0.241122	0.00581308	0.0360331	FALSE	FALSE
Emilin3	11.1495	12.4611	12.6557	14.2599	15.7327	15.3716	-0.322555	0.00582319	0.0360408	FALSE	TRUE
Nova2	10.1283	9.65437	9.38232	7.4998	6.72075	8.26249	0.374851	0.00583193	0.036075	TRUE	FALSE
Art4	7.43995	8.61926	7.31821	5.87656	5.45516	6.18638	0.416213	0.00585689	0.036165	TRUE	FALSE
Ehd3	23.6536	26.017	21.0998	29.917	30.3089	26.3603	-0.290658	0.00585937	0.036165	FALSE	TRUE
Gdpd5	20.5901	19.8661	18.3685	15.6982	16.3	16.4201	0.280949	0.00585368	0.036165	TRUE	FALSE
Ttc3	572.834	556.569	579.411	476.33	462.095	548.302	0.200839	0.00585819	0.036165	FALSE	FALSE
Brix1	136.837	144.716	136.919	163.968	161.32	152.751	-0.191962	0.00586361	0.0361713	FALSE	FALSE
Grap	10.3993	13.2374	13.0727	10.0271	8.68461	9.35297	0.387188	0.00589821	0.0363647	TRUE	FALSE
Gpr183	4.6682	4.79732	4.85796	3.63689	3.4913	3.31338	0.455662	0.00593944	0.0365988	TRUE	FALSE
Ifitm3	23.6536	21.9761	24.123	20.2597	18.9403	18.7688	0.266642	0.00595676	0.0366854	TRUE	FALSE
Zfp667	6.31458	6.7282	6.21318	4.78755	4.82236	4.82328	0.415962	0.00597285	0.0367643	TRUE	FALSE
Katnal1	38.4918	35.8704	37.1957	29.3211	28.2141	35.6084	0.26005	0.00599419	0.0368755	FALSE	FALSE
Aox4	0.604365	0.557365	0.354443	0.410948	0.567336	3.83765	-1.66225	0.00599902	0.0368849	FALSE	TRUE
Rasal2	37.8666	37.2639	37.9254	30.0609	27.4722	36.2794	0.268954	0.00600459	0.0368989	TRUE	FALSE
Lrp2	4.18888	4.29968	4.14907	2.44514	1.78929	3.85862	0.641447	0.00601608	0.0369493	TRUE	FALSE
Dcaf15	94.1143	95.7275	93.9275	109.662	113.838	102.212	-0.198812	0.00603887	0.037069	FALSE	FALSE
BC003965	40.7634	39.135	40.8235	48.0193	50.2093	43.1579	-0.227906	0.00604743	0.0371013	FALSE	FALSE
Dync1li1	67.8556	68.6157	69.0956	75.7994	77.5942	81.2827	-0.191043	0.00607075	0.037224	FALSE	FALSE
Tgfb1	26.2795	26.017	23.5809	20.9789	21.1878	21.3273	0.257121	0.00607437	0.0372258	FALSE	FALSE
Emg1	141.797	147.363	146.448	168.776	168.543	158.854	-0.187789	0.00607873	0.0372322	FALSE	FALSE
Rnpep	75.7749	74.2092	72.1605	90.5524	93.0868	77.2563	-0.231917	0.00608566	0.0372543	FALSE	FALSE
Fry	8.41944	8.26095	8.25645	5.44506	4.80054	7.61239	0.481058	0.00609902	0.0373158	TRUE	FALSE
Cacnb3	56.852	54.9602	56.565	44.5879	54.1152	40.6414	0.273231	0.00610788	0.0373496	TRUE	FALSE
Uchl3	48.8286	52.9895	51.1649	61.8477	58.2829	56.663	-0.208662	0.00613033	0.0374664	FALSE	FALSE
Efnb3	91.8635	90.7908	97.7013	107.956	104.39	106.573	-0.186001	0.00614079	0.0374981	FALSE	FALSE
Trib3	3.62619	7.38509	5.3792	4.3766	4.9751	41.8996	-1.64418	0.00614219	0.0374981	FALSE	TRUE
Sox12	230.055	230.57	230.555	197.604	212.511	196.035	0.189421	0.00615621	0.0375633	FALSE	FALSE
Ppa1	258.314	259.493	262.121	317.581	311.359	273.753	-0.210888	0.00618103	0.0376755	FALSE	FALSE
Proser2	3.52199	3.80203	4.06567	4.84919	4.47323	7.38171	-0.552501	0.00618131	0.0376755	FALSE	TRUE
Hoxa10	117.497	117.664	122.241	131.544	148.206	131.34	-0.201838	0.00621517	0.0378407	FALSE	FALSE
Rpl11	7.94011	6.96707	7.27651	9.73947	10.1902	8.87064	-0.376551	0.00621353	0.0378407	FALSE	TRUE
Tsc1	85.1947	85.0579	92.0093	71.8337	75.0411	81.0521	0.202415	0.00622141	0.0378582	FALSE	FALSE
Zfp46	45.3899	48.9685	47.558	39.862	40.1281	42.9272	0.207406	0.00623228	0.0379038	FALSE	FALSE
Rsad1	12.254	11.3265	12.2179	13.2736	14.4671	18.5382	-0.370517	0.00625263	0.0380069	FALSE	TRUE
Nup43	84.7987	86.0731	82.6479	95.3194	95.3343	97.1157	-0.182783	0.00627286	0.0381092	FALSE	FALSE
Utrn	159.177	150.588	161.272	108.799	103.124	160.825	0.337592	0.00627751	0.0381168	TRUE	FALSE
Pgap1	10.6493	10.5103	12.4055	8.40389	7.35355	9.77238	0.394101	0.00632008	0.0383546	TRUE	FALSE
Hcls1	5.27257	5.77271	5.4209	4.52043	3.90589	3.54406	0.459571	0.00632382	0.0383565	TRUE	FALSE
Icosl	5.54349	5.91205	5.3792	4.49988	3.84043	4.06833	0.439512	0.00633521	0.0384048	TRUE	FALSE
Csf1r	6.35626	5.63337	4.29502	3.63689	4.25502	3.52309	0.512993	0.00636652	0.0385642	TRUE	FALSE
Tox	2.14654	2.14984	3.10659	1.37668	1.74565	1.7196	0.612028	0.00636838	0.0385642	TRUE	FALSE
Safb2	95.0938	90.3927	97.18	106.867	108.776	105.714	-0.185109	0.00638634	0.0386319	FALSE	FALSE
Tspan5	29.7806	27.51	28.3972	32.958	31.989	35.6293	-0.231312	0.00638644	0.0386319	FALSE	FALSE
Lyl1	8.94044	12.2023	9.52827	7.1094	7.76814	8.09472	0.417538	0.00642699	0.0388563	TRUE	FALSE
Klf3	35.8868	35.8704	37.4876	29.5061	29.9815	33.763	0.2283	0.00644251	0.0389291	FALSE	FALSE
Ppp3r1	91.0925	95.3891	93.1769	108.429	103.539	105.525	-0.183058	0.0064542	0.0389788	FALSE	FALSE
Tfec	3.10519	4.33949	3.91973	3.04102	2.29117	2.43261	0.54862	0.00646428	0.0390186	TRUE	FALSE
Ddx51	79.7137	75.5031	75.6841	85.6621	88.3954	89.0629	-0.188449	0.00648787	0.0391021	FALSE	FALSE
Inpp5b	30.4892	31.1926	28.0427	34.458	33.6474	37.4119	-0.233837	0.00648722	0.0391021	FALSE	FALSE
Pinx1	41.5553	42.6385	40.0938	52.9712	49.6201	43.9338	-0.237434	0.00648855	0.0391021	FALSE	FALSE
F11r	82.5897	84.7195	81.2092	72.5734	73.0991	72.5589	0.187534	0.00654876	0.0394265	FALSE	FALSE
Lnp	56.6645	55.418	59.8801	47.2385	44.4268	54.9854	0.229528	0.00654941	0.0394265	FALSE	FALSE
Rxra	135.399	140.396	140.818	124.25	125.643	115.151	0.190666	0.00656324	0.0394674	FALSE	FALSE
Zfp619	5.06417	3.94137	3.71123	5.85601	5.58608	6.12347	-0.466271	0.00656176	0.0394674	FALSE	TRUE
Lrp3	92.1761	85.7347	86.9012	103.867	102.47	96.4446	-0.193342	0.00657224	0.0395003	FALSE	FALSE
Enc1	50.8292	50.9193	45.202	51.3069	62.5597	60.0393	-0.242733	0.00657917	0.0395208	FALSE	FALSE
Pcnx	101.471	94.772	101.955	79.0253	80.6272	96.4027	0.219743	0.00658484	0.0395337	FALSE	FALSE
Dapk1	129.334	133.589	118.134	106.23	108.514	117.164	0.199267	0.00662248	0.0397384	FALSE	FALSE
Reep3	46.2027	44.2707	47.5997	41.2181	39.1026	39.5299	0.203997	0.00663031	0.0397642	FALSE	FALSE
Ran	499.539	516.2	513.901	601.176	585.273	551.427	-0.18413	0.00667655	0.0400037	FALSE	FALSE
Tenm4	78.7759	66.9038	73.7868	44.5057	39.3862	75.4319	0.461928	0.00667738	0.0400037	TRUE	FALSE
Mcm10	163.95	156.759	159.645	179.132	179.213	184.69	-0.176966	0.00668388	0.0400213	FALSE	FALSE
Sec61a1	326.962	326.337	326.463	388.757	374.573	352.309	-0.18737	0.00670102	0.0401025	FALSE	FALSE
Exoc4	64.0419	65.6497	67.6361	52.4575	52.7623	63.8141	0.223226	0.00674602	0.0403451	FALSE	FALSE
Krt5	20.8402	30.3167	25.0195	19.8693	20.686	19.5448	0.342306	0.00674875	0.0403451	TRUE	FALSE
Cep350	68.46	61.8875	64.1334	43.1085	39.5172	66.5612	0.382389	0.00675425	0.0403565	TRUE	FALSE
Npepps	148.82	139.7	148.157	127.599	125.84	132.493	0.178156	0.00675918	0.0403644	FALSE	FALSE
Sgol2	74.2536	74.3088	74.5374	64.8065	60.2031	69.3294	0.19899	0.00676297	0.0403656	FALSE	FALSE
Mllt4	207.506	188.927	191.942	161.667	152.439	190.1	0.222664	0.00679723	0.0405485	FALSE	FALSE
Nfxl1	60.895	58.7622	56.3982	65.875	65.7456	69.3084	-0.190661	0.00684389	0.0408051	FALSE	FALSE
Dnmbp	71.2318	67.9389	68.6161	57.8409	58.9812	64.7368	0.194619	0.00686129	0.0408746	FALSE	FALSE
Nob1	108.098	114.18	113.63	126.284	125.054	128.865	-0.178687	0.00686514	0.0408746	FALSE	FALSE
Thra	29.864	33.6012	33.5679	24.7185	27.5376	29.2123	0.252439	0.00686647	0.0408746	FALSE	FALSE
Pck2	28.8011	30.2172	27.9176	30.0198	31.9672	79.1857	-0.699398	0.00688139	0.0409417	FALSE	TRUE
Cpq	6.1687	6.80782	7.7352	5.36287	5.01874	5.01202	0.427677	0.00689022	0.0409508	TRUE	FALSE
Thumpd3	70.1064	72.4177	68.0531	81.7581	77.8124	80.9891	-0.192038	0.00688754	0.0409508	FALSE	FALSE
Tsfm	50.6	51.8549	51.2692	64.2723	62.036	53.6852	-0.227573	0.00692166	0.0411159	FALSE	FALSE
Rybp	24.0287	24.3847	24.2689	28.3965	26.4466	31.4771	-0.248224	0.00692595	0.0411196	FALSE	FALSE
Ctu2	50.6417	50.9193	49.2676	62.9367	58.3484	54.0207	-0.216989	0.00693747	0.0411663	FALSE	FALSE
Pccb	48.1825	53.0293	47.7248	43.6632	43.0957	41.9416	0.210802	0.00698744	0.0414409	FALSE	FALSE
Lrrc47	98.5532	100.385	99.9739	112.292	114.624	111.648	-0.179668	0.00702909	0.0416658	FALSE	FALSE
Dnah2	3.04267	2.94607	3.23169	1.9931	1.98568	2.45358	0.518454	0.00706847	0.041855	TRUE	FALSE
Tob1	12.9834	13.8545	13.9275	9.63673	12.0013	10.3805	0.348956	0.00706763	0.041855	TRUE	FALSE
Sar1b	39.8673	40.628	38.3633	45.2043	47.8745	44.1854	-0.207519	0.00708904	0.0419541	FALSE	FALSE
Sephs2	91.0299	96.7626	88.7151	109.435	108.776	99.5063	-0.200349	0.00709268	0.0419541	FALSE	FALSE
Shq1	26.8213	27.8683	28.8142	33.6977	33.1237	31.1206	-0.230069	0.00709744	0.0419602	FALSE	FALSE
Hmga1	5.52265	4.75751	4.46182	5.99984	6.58983	7.42365	-0.440848	0.00711098	0.0419934	FALSE	TRUE
Ncf2	3.08435	3.384	3.25254	2.52733	2.2257	2.07611	0.508635	0.00710764	0.0419934	TRUE	FALSE
Zfp57	48.8702	40.7076	43.6382	53.7315	57.9774	47.5617	-0.257725	0.00711429	0.0419934	FALSE	FALSE
Rgs12	119.123	111.931	110.816	93.0387	101.75	104.141	0.193677	0.0071281	0.0420528	FALSE	FALSE
Lgi2	6.33542	7.0666	7.7769	9.80111	8.48822	9.49976	-0.392097	0.00715467	0.0421873	FALSE	TRUE
Ccdc34	119.789	105.76	110.211	101.422	97.1673	93.6555	0.200171	0.00718828	0.042344	FALSE	FALSE
Gfer	36.2619	41.4242	37.2583	46.6221	43.2267	44.1854	-0.221558	0.00718879	0.042344	FALSE	FALSE
Diexf	58.811	59.658	59.8384	66.2243	65.3746	71.5523	-0.188212	0.00719311	0.0423472	FALSE	FALSE
Tagln3	7.41911	7.7434	7.19312	10.0066	10.0157	8.78676	-0.365522	0.00720892	0.0424181	FALSE	TRUE
Rpl38	55.8725	59.24	53.4584	63.0394	69.4332	62.5349	-0.209946	0.00722085	0.042466	FALSE	FALSE
Cnn2	267.067	283.241	289.497	316.636	313.65	323.516	-0.183632	0.00723419	0.0425222	FALSE	FALSE
Amer2	4.48064	4.12052	4.12822	5.85601	5.19331	6.08153	-0.428784	0.00725128	0.0425883	FALSE	TRUE
Arhgap23	32.3648	38.3189	34.4853	27.7801	24.9192	33.2387	0.291269	0.00726441	0.0425883	TRUE	FALSE
Mrpl30	61.3952	63.6193	62.8616	73.8063	73.8846	67.6937	-0.197075	0.00726329	0.0425883	FALSE	FALSE
Npepl1	45.8276	51.5961	48.9757	42.4304	43.4449	40.2219	0.215536	0.00725615	0.0425883	FALSE	FALSE
Zfpm2	4.564	3.42382	3.81548	2.81499	2.55301	2.97785	0.498532	0.00725883	0.0425883	TRUE	FALSE
Mrps30	63.6876	65.8886	64.738	72.0187	73.7319	74.6769	-0.181847	0.00727668	0.0426157	FALSE	FALSE
Ptch2	9.50312	11.8042	10.1538	6.65736	9.36105	7.3188	0.431876	0.00727545	0.0426157	TRUE	FALSE
Gtpbp3	42.7015	42.2801	42.9085	50.074	48.7909	47.7295	-0.196966	0.0072868	0.0426527	FALSE	FALSE
Bcl9	204.776	190.838	192.379	170.009	175.569	173.365	0.180218	0.00729103	0.0426552	FALSE	FALSE
Ttc23	61.5411	66.3862	65.7597	57.0396	57.1046	55.3209	0.192795	0.00731808	0.0427911	FALSE	FALSE
Thsd7a	4.95996	4.59826	5.56685	2.95883	3.14217	4.48775	0.513659	0.00736132	0.0430216	TRUE	FALSE
Ddx31	42.9933	40.6081	40.344	47.8344	48.3109	46.3664	-0.20138	0.00736723	0.0430337	FALSE	FALSE
Hykk	7.60667	8.00217	7.69351	6.18477	5.69518	5.99764	0.382013	0.00738788	0.0431318	TRUE	FALSE
Mllt6	101.2	93.936	105.249	117.326	122.916	107.224	-0.21007	0.0074011	0.0431865	FALSE	FALSE
Iglon5	9.79489	9.47521	9.36147	6.82174	8.00817	7.48657	0.359848	0.0074212	0.043265	TRUE	FALSE
Nup210	45.3274	44.0916	43.4506	49.0672	48.8564	55.3838	-0.206461	0.00742612	0.043265	FALSE	FALSE
Ptpn21	28.9679	29.7195	28.5431	22.5405	21.8643	27.8492	0.271641	0.00742506	0.043265	TRUE	FALSE
Myef2	62.8332	62.9226	62.0693	70.1283	72.139	70.8812	-0.182414	0.00744735	0.0433662	FALSE	FALSE
Abhd11	17.0264	17.7561	16.9716	20.3008	21.166	20.6143	-0.262242	0.00748852	0.0435833	FALSE	FALSE
Brms1l	46.7445	46.8585	42.5749	39.6565	40.2372	37.6216	0.212751	0.00749486	0.0435976	FALSE	FALSE
Atf5	25.5709	28.1868	26.062	28.7047	30.1343	39.5089	-0.30104	0.00751904	0.043693	FALSE	TRUE
Them6	2.81343	2.98589	2.98149	4.10948	4.21138	3.79571	-0.4639	0.00751624	0.043693	FALSE	TRUE
Plch2	6.1687	6.90735	5.27495	4.64371	4.53869	4.29901	0.445138	0.00753067	0.0437379	TRUE	FALSE
Hyou1	332.109	294.349	331.905	403.181	365.146	343.795	-0.214708	0.00759709	0.0441008	FALSE	FALSE
Sema6c	21.2987	19.9855	21.7461	14.6298	20.0095	15.1828	0.339674	0.00760306	0.0441127	TRUE	FALSE
Necap1	50.2457	50.9591	50.185	57.0396	54.748	61.7799	-0.197281	0.00761822	0.0441326	FALSE	FALSE
Shmt1	138.316	142.068	145.405	162.735	161.102	157.658	-0.177379	0.0076183	0.0441326	FALSE	FALSE
Tmc7	9.52397	8.26095	8.84023	11.5887	11.6959	10.6322	-0.349334	0.00761239	0.0441326	FALSE	TRUE
Ankrd46	84.1735	84.5802	81.2718	72.3885	75.6958	71.1329	0.189793	0.00762364	0.0441345	FALSE	FALSE
Elovl5	131.564	128.931	142.799	157.742	154.861	146.984	-0.188547	0.00762882	0.0441345	FALSE	FALSE
Usp39	147.736	156.679	148.282	180.16	175.154	162.398	-0.193571	0.00763042	0.0441345	FALSE	FALSE
Rpl13	26.217	26.5147	23.9979	31.0471	32.0327	28.2057	-0.250387	0.0076372	0.044151	FALSE	FALSE
A930024E05Rik	4.83492	4.06081	4.96221	5.48616	6.28434	7.13006	-0.44787	0.00767734	0.0443373	FALSE	TRUE
Ltbp4	11.8372	10.9482	11.4881	7.9313	9.12102	9.77238	0.353583	0.00767686	0.0443373	TRUE	FALSE
Gimap9	4.58484	5.43431	6.00469	4.27386	3.27309	3.96348	0.476153	0.00770318	0.0444637	TRUE	FALSE
Zfp385a	112.079	108.189	112.463	99.8398	101.204	86.6093	0.210026	0.00772318	0.0445562	FALSE	FALSE
Zfp697	20.5276	20.2244	20.7871	16.7461	16.8237	17.8461	0.259179	0.0077335	0.0445928	FALSE	FALSE
Acox3	9.85741	10.2914	10.3414	7.60254	8.66279	7.61239	0.353061	0.00774749	0.0446506	TRUE	FALSE
Cct7	822.52	848.569	834.631	998.44	956.922	892.432	-0.184619	0.00776861	0.0447263	FALSE	FALSE
Pspc1	132.481	138.028	134.459	147.571	147.704	164.285	-0.182436	0.0077681	0.0447263	FALSE	FALSE
Pwp1	150.904	153.773	148.428	173.667	167.713	170.283	-0.175346	0.00778554	0.0448008	FALSE	FALSE
Podxl	234.369	220.617	216.753	187.947	173.649	216.691	0.216067	0.0077918	0.0448138	FALSE	FALSE
Rabgap1	103.909	105.919	107.084	91.4771	92.8904	96.2139	0.175668	0.00781151	0.0449042	FALSE	FALSE
1700020L24Rik	3.54283	3.54325	3.66953	2.46569	2.6403	2.64232	0.472959	0.0078335	0.0449615	TRUE	FALSE
Ncoa1	10.8161	12.7199	12.76	7.37652	7.59358	11.513	0.454589	0.00783271	0.0449615	TRUE	FALSE
Zbed6	77.588	65.0326	74.2455	51.1836	44.2086	73.2719	0.362498	0.00783088	0.0449615	TRUE	FALSE
Eri3	80.589	83.1271	78.7698	68.0941	76.0449	64.9465	0.213963	0.00784621	0.0449654	FALSE	FALSE
Farsb	142.985	149.692	146.218	163.66	162.716	169.003	-0.174641	0.00784589	0.0449654	FALSE	FALSE
Spryd7	13.692	14.4716	13.4271	16.89	16.4528	17.3428	-0.285169	0.00784112	0.0449654	FALSE	TRUE
Cnp	9.62817	10.6696	9.96611	6.94502	9.03374	7.08812	0.392568	0.00786061	0.0450038	TRUE	FALSE
Tcp1	755.102	762.735	758.217	864.08	841.6	849.715	-0.167013	0.00786092	0.0450038	FALSE	FALSE
Gnas	1775.02	1816.57	1828.41	1625.16	1649.62	1505.3	0.181261	0.00787844	0.045081	FALSE	FALSE
Ctsd	149.403	154.092	153.495	138.161	138.103	124.65	0.188889	0.00792066	0.0452534	FALSE	FALSE
Mrpl47	32.6566	33.9993	34.6937	39.2661	38.557	39.2783	-0.208421	0.00791785	0.0452534	FALSE	FALSE
Nup93	198.586	200.293	192.817	230.357	223.618	216.88	-0.181138	0.00791959	0.0452534	FALSE	FALSE
Pabpn1	338.757	316.086	313.536	366.216	388.625	350.589	-0.190954	0.00794289	0.0453574	FALSE	FALSE
Mgat3	46.8279	47.595	46.8699	41.7112	42.2447	38.6701	0.204488	0.0079514	0.0453828	FALSE	FALSE
Guk1	63.9585	67.9588	68.1991	78.6555	75.0411	74.7608	-0.191091	0.00796237	0.0453993	FALSE	FALSE
Rdh10	29.6973	29.9186	26.5833	28.0678	46.1506	37.4119	-0.372625	0.00796216	0.0453993	FALSE	TRUE
Slx1b	20.8193	22.3941	20.7245	25.15	26.7084	24.3471	-0.252891	0.00797402	0.0454426	FALSE	FALSE
Polr3h	42.5765	45.5845	43.7216	49.4165	49.9256	51.7139	-0.19572	0.00797821	0.0454434	FALSE	FALSE
Fam111a	51.7045	49.0283	48.5796	45.0399	44.3832	37.7893	0.231084	0.00799033	0.0454894	FALSE	FALSE
Kti12	71.2109	69.1929	65.3218	85.806	80.0599	73.1461	-0.216376	0.00802224	0.0456247	FALSE	FALSE
Smn1	82.7147	83.5451	85.4208	99.1412	96.098	91.2438	-0.186872	0.00801984	0.0456247	FALSE	FALSE
Ptgr1	13.0251	12.7796	13.1353	9.80111	11.4558	9.5417	0.338722	0.00804066	0.0457063	TRUE	FALSE
Fam78a	8.3986	9.71408	10.0495	6.90393	7.44083	7.4656	0.368943	0.00805354	0.0457563	TRUE	FALSE
Dnajc12	7.31491	6.90735	8.08965	5.13685	6.37162	5.0959	0.426559	0.00806387	0.0457918	TRUE	FALSE
Myo18a	92.1553	88.1633	97.5345	78.6555	75.4339	87.532	0.201448	0.00808251	0.0458745	FALSE	FALSE
Col11a1	49.6205	44.848	44.4931	39.2045	34.1493	43.8709	0.245131	0.00809581	0.0459268	FALSE	FALSE
Htra2	51.2877	55.4778	51.9781	62.3203	59.9849	59.3892	-0.194744	0.00815527	0.0462407	FALSE	FALSE
Macrod1	3.18855	3.52335	3.04404	1.64379	2.2257	2.74717	0.560771	0.00817993	0.0463571	TRUE	FALSE
Sfmbt2	4.79324	3.76222	5.129	2.50678	2.35663	4.17318	0.597292	0.00819491	0.0463951	TRUE	FALSE
Tmem87a	32.3856	31.312	32.5254	34.3553	38.928	39.0895	-0.223714	0.00819311	0.0463951	FALSE	FALSE
Mpzl3	2.04234	2.94607	2.66875	3.86291	3.27309	3.85862	-0.521088	0.00820496	0.0464286	FALSE	TRUE
Peli2	44.4938	44.3305	45.3062	36.7799	35.5458	42.8433	0.219741	0.00821468	0.0464601	FALSE	FALSE
Gm16576	4.23056	3.94137	5.3792	2.99992	3.05489	3.586	0.490226	0.00824896	0.0466305	TRUE	FALSE
Txnip	29.5931	31.9092	34.3185	28.4993	27.494	24.0535	0.25946	0.00825621	0.046648	FALSE	FALSE
Comtd1	6.43962	6.4097	6.52593	8.56827	9.29559	7.59142	-0.393365	0.00837198	0.0472702	FALSE	TRUE
Mief1	70.8566	73.9106	75.4756	83.2786	80.78	86.3157	-0.185017	0.00837795	0.0472702	FALSE	FALSE
Qsox1	26.1128	25.8777	28.5431	20.9994	23.5881	23.2356	0.247909	0.00837898	0.0472702	FALSE	FALSE
Stx7	23.7787	26.4151	24.7276	19.1913	22.017	21.3483	0.260602	0.00842116	0.0474843	FALSE	FALSE
Ppt1	46.4945	43.6537	45.3896	36.862	42.092	37.9361	0.213691	0.0084418	0.0475768	FALSE	FALSE
Zfp366	5.18921	5.31488	5.10815	3.80127	3.36038	4.34095	0.439947	0.00845024	0.0476005	TRUE	FALSE
Ip6k1	143.11	149.095	154.579	134.216	134.437	124.147	0.185793	0.00846776	0.0476752	FALSE	FALSE
Neo1	226.783	199.338	210.143	165.879	171.052	207.128	0.225828	0.00847647	0.0477003	FALSE	FALSE
Ramp2	39.3671	40.9863	42.012	34.458	37.0078	34.2872	0.210645	0.00849322	0.0477707	FALSE	FALSE
Ppp1r15b	186.249	183.552	181.058	204.406	194.247	232.88	-0.197203	0.00850652	0.0478215	FALSE	FALSE
Zfp429	2.91763	2.94607	3.08574	2.30131	1.20013	2.32776	0.615374	0.00851855	0.0478651	TRUE	FALSE
Clasrp	51.0168	41.882	45.1186	51.4918	57.4101	53.098	-0.23117	0.00853702	0.0479449	FALSE	FALSE
Rundc3b	2.04234	2.48824	2.46025	2.99992	3.14217	3.85862	-0.515657	0.00856018	0.0480509	FALSE	TRUE
[truncated: 9,222 more rows]

## Sheet: Hand_mutant
Gene	CPM_mutant_rep1	CPM_mutant_rep2	CPM_mutant_rep3	CPM_wt_rep1	CPM_wt_rep2	CPM_wt_rep3	CPM_wt_rep4	log2FC	PValue	FDR	UP_regulated	DOWN_regulated
AA388235	4.72202	3.65486	4.43832	0	0	0.014579	0	9.49811	2.2649e-73	2.64835e-69	TRUE	FALSE
Gm9199	0.0285318	0.11265	0.0138265	4.81242	4.20294	4.43202	4.23189	-6.31565	4.92281e-60	2.87812e-56	FALSE	TRUE
Olfm1	41.4996	39.0394	40.5117	99.1193	94.833	85.0685	91.8721	-1.20009	4.51809e-48	1.761e-44	FALSE	TRUE
Eno1b	115.597	143.691	143.547	329.599	307.182	306.378	281.078	-1.18837	2.94538e-44	8.61008e-41	FALSE	TRUE
Akr1e1	12.0262	23.5063	25.4132	4.15149	2.88535	4.00922	3.48845	2.48367	5.61308e-28	1.31268e-24	TRUE	FALSE
Hoxd11	60.0738	49.9289	48.2684	134.107	119.133	94.676	131.017	-1.18228	2.39276e-23	4.66309e-20	FALSE	TRUE
Acaa1a	34.8088	31.2666	30.9161	15.3667	15.4275	16.795	15.984	1.02362	4.0337e-23	6.73801e-20	TRUE	FALSE
Gli1	20.9281	12.8796	10.2455	45.9142	44.281	38.3428	45.5929	-1.568	1.25178e-16	1.82964e-13	FALSE	TRUE
Ptch1	50.5869	40.241	35.548	71.1949	85.9601	82.1381	87.6545	-0.956695	8.70984e-16	1.1316e-12	FALSE	TRUE
Gm266	6.9047	7.33476	8.69689	16.3374	16.9785	15.133	16.0698	-1.07662	1.73419e-14	2.02779e-11	FALSE	TRUE
Hand2	2.13989	0.11265	0.0691326	137.619	144.785	107.272	166.888	-7.48956	6.02446e-14	6.404e-11	FALSE	TRUE
Ptch2	6.277	4.21811	3.47046	13.4045	15.0605	11.6632	15.1833	-1.57111	1.55179e-13	1.51209e-10	FALSE	TRUE
Gja3	2.85318	3.64235	3.29071	18.0517	8.97294	11.6486	8.8641	-1.86218	1.90555e-13	1.71397e-10	FALSE	TRUE
Gnpda1	24.2378	15.6834	15.624	7.66269	8.58934	7.53734	8.50668	1.19648	5.4565e-12	4.55735e-09	TRUE	FALSE
Cntfr	11.0561	16.0839	15.7899	28.5027	29.5874	32.8902	22.9752	-0.992677	2.07447e-11	1.61712e-08	FALSE	TRUE
Snhg11	2.18269	2.29055	4.30005	0.764204	0.683812	0.87474	0.571878	2.0131	7.50357e-11	5.4837e-08	TRUE	FALSE
Dok4	30.5861	35.5223	34.8152	84.2483	51.4693	75.4172	52.5412	-0.969931	8.15353e-11	5.60819e-08	FALSE	TRUE
Lhx9	319.385	302.903	298.473	212.573	204.326	162.279	223.475	0.613164	1.00688e-10	6.54079e-08	TRUE	FALSE
Pkig	52.7696	52.5699	51.1443	72.9298	77.9879	69.017	77.0176	-0.509165	1.1021e-10	6.78255e-08	FALSE	TRUE
Ano1	3.03864	3.36698	2.95888	11.1326	7.18836	7.31866	7.50589	-1.40525	1.2702e-10	7.42625e-08	FALSE	TRUE
Hoxd12	14.6368	7.18456	6.40168	24.3099	37.643	22.3496	38.5874	-1.70789	3.22791e-10	1.79733e-07	FALSE	TRUE
Dstyk	44.9662	42.5566	45.0745	26.2514	31.0884	29.5079	31.7964	0.5743	4.13124e-10	2.19575e-07	TRUE	FALSE
Gm10653	7.09016	8.86179	10.7017	16.3374	16.4115	16.9116	18.2	-0.933183	4.41207e-10	2.24306e-07	FALSE	TRUE
Alx4	180.621	162.616	187.184	135.574	117.916	116.297	132.518	0.49373	4.70438e-10	2.29201e-07	TRUE	FALSE
Gli3	309.242	340.791	386.147	257.413	249.008	258.515	246.494	0.449951	1.20316e-09	5.62742e-07	TRUE	FALSE
Tmem181c-ps	1.98296	0.575766	0.608367	7.51811	4.97014	5.17554	4.97533	-2.42321	2.05087e-09	9.22338e-07	FALSE	TRUE
Asns	64.0682	82.3095	78.9771	123.388	97.5683	112.958	108.528	-0.55786	2.79586e-09	1.21081e-06	FALSE	TRUE
Msx2	45.7936	50.4546	48.3099	33.2532	30.8883	36.7682	34.6272	0.507598	3.6696e-09	1.47961e-06	TRUE	FALSE
Tpd52l1	9.28711	9.07457	7.89495	15.7798	14.4268	16.7367	14.8831	-0.820299	3.6531e-09	1.47961e-06	FALSE	TRUE
Trappc12	35.4365	33.0314	38.6175	23.2772	24.3003	25.3237	24.3906	0.552683	3.95842e-09	1.54286e-06	TRUE	FALSE
Epha4	187.283	158.686	164.632	95.8559	127.506	108.555	122.453	0.58304	4.27713e-09	1.61331e-06	TRUE	FALSE
Inf2	9.85775	9.56272	9.67857	16.3168	16.6283	15.0747	19.7727	-0.805523	5.28885e-09	1.93258e-06	FALSE	TRUE
Cdon	202.847	173.831	174.781	109.921	140.815	115.553	132.661	0.559174	6.1487e-09	2.17869e-06	TRUE	FALSE
Trappc5	41.9133	43.5955	38.8802	63.7594	56.0058	56.7269	55.9725	-0.486421	1.13656e-08	3.90876e-06	FALSE	TRUE
Ets2	154.286	161.102	170.052	250.721	210.864	205.491	214.912	-0.44617	1.47159e-08	4.91636e-06	FALSE	TRUE
Srp54a	23.6957	21.804	25.0398	15.2428	15.1773	15.2788	15.9411	0.609088	2.1526e-08	6.99176e-06	TRUE	FALSE
Frem1	47.4627	47.0751	50.0106	60.5786	75.5195	76.0295	65.1226	-0.525022	2.33269e-08	7.37193e-06	FALSE	TRUE
Serinc5	26.6345	29.339	25.8141	38.8918	38.4269	46.1134	36.929	-0.556336	2.4937e-08	7.67339e-06	FALSE	TRUE
Sall1	64.5533	51.869	46.4848	79.849	105.707	76.0295	104.453	-0.753105	3.65052e-08	1.0945e-05	FALSE	TRUE
Mri1	12.5112	15.9212	15.3336	26.7058	21.1148	23.0931	23.0467	-0.685889	3.76587e-08	1.10086e-05	FALSE	TRUE
Gpx2	1.89737	1.3518	1.60388	5.7212	3.70259	3.39691	5.51862	-1.50184	4.15046e-08	1.18369e-05	FALSE	TRUE
Ptpmt1	20.9424	17.8237	18.4446	29.2463	28.2031	26.4463	30.0522	-0.579113	5.58054e-08	1.55365e-05	FALSE	TRUE
Glo1	99.3193	109.633	105.566	221.681	115.798	219.443	240.417	-0.927004	6.47811e-08	1.76159e-05	FALSE	TRUE
Cyp4f16	9.71509	7.96059	8.13	4.62653	4.0028	4.27165	4.63221	0.972384	7.17168e-08	1.90588e-05	TRUE	FALSE
Phlda1	19.4872	23.0181	20.6568	28.3169	30.955	31.5052	31.0101	-0.532295	7.96815e-08	2.07048e-05	FALSE	TRUE
Mme	79.1616	42.3188	48.462	21.9554	28.2531	26.5484	35.8138	1.00846	9.19166e-08	2.33648e-05	TRUE	FALSE
Tgds	15.0505	15.1577	15.14	23.711	22.0654	22.3933	21.7599	-0.572115	9.69604e-08	2.41225e-05	FALSE	TRUE
Rnd3	79.0047	75.926	71.8426	100.689	93.9824	103.219	98.849	-0.391931	1.01539e-07	2.47354e-05	FALSE	TRUE
Ccnd1	257.814	264.59	253.731	355.417	325.494	311.116	353.721	-0.378909	1.07714e-07	2.57041e-05	FALSE	TRUE
Nrxn1	2.93878	3.2293	3.27689	1.2599	1.50105	1.41416	0.943598	1.29955	1.78972e-07	4.10338e-05	TRUE	FALSE
Pcdhgb6	14.7938	7.66019	7.72903	4.11018	4.21962	4.54865	4.11752	1.24232	1.76168e-07	4.10338e-05	TRUE	FALSE
Peg3	1488.53	1527.72	1663.83	1090.99	1203.98	1315.89	1099.62	0.405675	1.90778e-07	4.28994e-05	TRUE	FALSE
Gas1	547.312	550.019	539.719	427.231	409.553	458.655	423.089	0.344933	2.21213e-07	4.88045e-05	TRUE	FALSE
Cwc22	68.4336	287.845	239.005	72.3309	68.9816	72.1952	72.2281	1.47394	2.30982e-07	4.94355e-05	TRUE	FALSE
Leprel1	6.61939	8.39867	7.74286	17.7626	11.0911	16.8679	12.7672	-0.945144	2.32528e-07	4.94355e-05	FALSE	TRUE
Hoxd13	53.1405	39.6903	39.931	70.3068	67.2137	63.8123	61.6913	-0.571272	2.50432e-07	5.22911e-05	FALSE	TRUE
Timm17a	42.5552	46.0988	45.5031	55.2292	63.7613	58.87	71.1273	-0.477553	3.44137e-07	7.05963e-05	FALSE	TRUE
Gm13157	18.617	7.94807	8.90428	28.5027	25.7013	28.0646	24.8195	-1.17954	4.1456e-07	8.35767e-05	FALSE	TRUE
Dusp4	28.646	30.8285	29.8515	39.4288	41.3623	37.7742	42.6907	-0.437111	4.30035e-07	8.52271e-05	FALSE	TRUE
Dach1	130.676	103.625	112.036	65.8868	83.6919	88.859	80.6776	0.53258	4.50739e-07	8.78414e-05	TRUE	FALSE
Irs1	33.9814	28.5004	31.2203	38.8505	49.1177	43.9994	47.8376	-0.526064	5.60481e-07	0.000107438	FALSE	TRUE
Igfbp4	648.985	576.129	588.609	775.543	822.592	736.137	820.516	-0.383568	5.95746e-07	0.000112356	FALSE	TRUE
Esd	94.369	88.1548	90.6329	115.147	118.616	110.611	126.185	-0.369761	6.22199e-07	0.000115482	FALSE	TRUE
Sema3a	93.4132	108.807	125.199	74.0038	76.5035	86.3951	82.5934	0.450053	6.40435e-07	0.000117009	TRUE	FALSE
Wdfy1	5.79196	5.20693	22.1778	39.0157	39.0106	38.299	38.3873	-1.80635	6.73416e-07	0.000121142	FALSE	TRUE
Mat2a	248.997	269.283	267.129	396.085	305.063	352.899	335.521	-0.407946	7.11668e-07	0.000126084	FALSE	TRUE
Pml	41.0288	38.6639	41.4519	28.069	31.1218	27.0586	31.6391	0.453888	7.3858e-07	0.000128899	TRUE	FALSE
Kctd12	123.343	137.846	161.176	103.168	87.1443	113.206	77.6181	0.563352	7.53292e-07	0.000129533	TRUE	FALSE
Gfra2	2.82465	1.38935	1.10612	0.537008	0.517028	0.626897	0.443205	1.73482	7.87123e-07	0.000133389	TRUE	FALSE
Smim7	54.6385	52.0067	53.0662	69.1088	64.4618	70.2125	74.5013	-0.386341	9.32646e-07	0.000155792	FALSE	TRUE
Prex1	74.839	72.3588	75.8385	93.6046	97.685	95.9006	91.0572	-0.347049	1.00379e-06	0.000163018	FALSE	TRUE
Tubb2a	10.6566	11.7531	11.7664	15.945	17.1286	17.8301	18.4716	-0.606979	9.91509e-07	0.000163018	FALSE	TRUE
Tmco6	21.3275	14.9198	14.7114	9.66615	10.4907	9.81167	9.77911	0.772945	1.04502e-06	0.000167389	TRUE	FALSE
Uchl1	21.299	21.0405	19.7996	12.8056	13.5428	12.6983	15.698	0.596843	1.08675e-06	0.000169432	TRUE	FALSE
Zkscan4	2.81039	2.72863	2.76531	1.01205	1.20084	1.07885	1.47258	1.21026	1.07813e-06	0.000169432	TRUE	FALSE
Gadd45gip1	33.9672	35.0717	33.8473	48.4547	43.6472	42.9497	46.9368	-0.407246	1.22408e-06	0.00018833	FALSE	TRUE
Flnb	167.596	171.641	188.013	121.137	137.263	149.755	117.464	0.419347	1.38918e-06	0.000210957	TRUE	FALSE
Snrpb2	119.292	104.038	120.885	89.8456	88.3118	90.6814	90.6283	0.352317	1.74934e-06	0.000262244	TRUE	FALSE
Glis1	7.83199	7.09694	8.08852	3.63513	4.15291	4.43202	4.26049	0.894485	1.84713e-06	0.000269981	TRUE	FALSE
Urgcp	22.8255	22.9806	27.7222	17.019	17.212	16.9116	17.042	0.52376	1.83822e-06	0.000269981	TRUE	FALSE
Nckap1	266.316	295.618	301.1	237.172	223.49	237.9	222.746	0.320854	1.95484e-06	0.000282197	TRUE	FALSE
Alcam	27.9041	20.7276	18.1819	10.2238	13.4594	11.3716	15.5122	0.815495	2.28611e-06	0.000325994	TRUE	FALSE
Gm13051	1.15554	0.500666	0.511582	2.76766	2.15151	1.98274	1.93009	-1.61072	2.59286e-06	0.000365281	FALSE	TRUE
Galnt16	11.9548	11.5654	12.914	20.6335	18.9466	18.3987	16.0984	-0.607657	2.71385e-06	0.000377774	FALSE	TRUE
Macrod2	9.82922	6.03303	7.46633	3.18074	4.16958	3.28027	4.16041	1.07014	2.9358e-06	0.000403863	TRUE	FALSE
Sft2d2	39.5451	37.1494	35.4374	23.6903	27.1023	28.5603	28.8655	0.465	2.98722e-06	0.000406157	TRUE	FALSE
Frem2	85.6668	90.4453	104.155	40.9779	56.3728	76.1315	60.7763	0.673059	3.61085e-06	0.000485307	TRUE	FALSE
Vegfa	32.2267	33.2067	34.4695	50.2929	45.5986	39.7715	44.0775	-0.431373	3.73963e-06	0.000496903	FALSE	TRUE
Mtr	50.6583	50.9303	52.3749	36.4959	40.912	41.4335	39.1593	0.377058	3.96325e-06	0.000520699	TRUE	FALSE
1700030C10Rik	2.13989	0.237816	2.15694	0.309812	0.266853	0.262422	0.243048	2.47638	4.05726e-06	0.000527128	TRUE	FALSE
Pdlim3	2.86745	3.12916	3.44281	7.12568	6.33777	7.14371	4.83237	-1.01352	4.73912e-06	0.000608951	FALSE	TRUE
LOC102636514	14.6226	10.0133	12.8172	4.70915	6.30441	4.67986	8.74973	1.02822	5.27078e-06	0.000669905	TRUE	FALSE
Dctd	67.0213	82.7726	82.0881	119.464	93.2486	99.939	102.38	-0.424302	5.46652e-06	0.000687312	FALSE	TRUE
Stat2	18.5314	17.1228	16.578	9.08783	12.1585	10.9197	12.3954	0.642241	6.07803e-06	0.000756068	TRUE	FALSE
Ccdc124	76.4083	86.1521	82.254	105.811	95.6836	100.901	107.613	-0.328752	6.35119e-06	0.000781731	FALSE	TRUE
Cenpf	316.404	250.946	302.013	172.71	218.486	233.308	215.226	0.464835	7.02042e-06	0.000846287	TRUE	FALSE
Crip1	3.53795	2.4783	2.41964	0.950091	0.80056	1.21006	1.58696	1.29714	6.99677e-06	0.000846287	TRUE	FALSE
2610305D13Rik	8.67368	1.89001	2.04633	15.408	14.7436	17.4511	13.8823	-1.87124	7.51717e-06	0.000896921	FALSE	TRUE
Arrdc3	76.3797	81.0578	81.6456	53.7834	59.8919	66.7572	64.8938	0.377084	7.71238e-06	0.000910918	TRUE	FALSE
Chsy3	3.23836	2.79121	2.64087	1.42514	1.18416	1.61827	1.10086	1.11709	8.11674e-06	0.00094909	TRUE	FALSE
Snai1	51.1861	52.1319	47.1346	73.0125	61.2262	61.1006	67.839	-0.391171	8.64e-06	0.00100027	FALSE	TRUE
Stox2	210.137	196.336	211.297	172.917	166.016	167.644	164.372	0.295957	9.38566e-06	0.00107595	TRUE	FALSE
Lnpep	42.4554	34.0328	39.5992	26.8711	26.5186	31.2574	27.8504	0.459505	9.49879e-06	0.00107834	TRUE	FALSE
Xpr1	104.712	107.38	107.529	81.6252	87.6947	90.5356	85.3527	0.303645	1.09105e-05	0.0012267	TRUE	FALSE
Rpgrip1l	32.9257	29.9398	31.9946	19.5595	24.734	24.2303	22.9466	0.466208	1.10862e-05	0.00123458	TRUE	FALSE
Lox	4.77908	2.56591	4.83928	1.2599	1.78458	1.96816	1.94438	1.21662	1.13909e-05	0.00125655	TRUE	FALSE
Agtrap	23.8811	22.4424	21.1269	15.2841	16.2781	16.3431	16.3986	0.483259	1.20099e-05	0.00130029	TRUE	FALSE
Has2	10.942	11.7406	8.91811	14.7264	17.8792	20.6147	15.0118	-0.695787	1.1959e-05	0.00130029	FALSE	TRUE
Msi2	124.813	145.806	146.022	182.955	167.334	172.411	169.219	-0.316526	1.23922e-05	0.00132938	FALSE	TRUE
Prr5	12.1831	13.3302	13.5362	20.0139	17.4289	18.6903	18.3859	-0.516467	1.25943e-05	0.00133877	FALSE	TRUE
Nudcd3	121.945	123.927	105.69	148.607	142.8	150.28	145.5	-0.324934	1.38957e-05	0.00146381	FALSE	TRUE
Ifrd1	49.6311	49.7787	45.6967	69.398	54.5382	69.1628	63.4927	-0.407131	1.54529e-05	0.00161331	FALSE	TRUE
Cxcl14	82.5997	54.097	58.9425	18.093	38.7438	22.1018	45.8217	1.06349	1.56731e-05	0.00162181	TRUE	FALSE
Prcp	41.3284	40.7292	40.1661	32.1379	30.1878	33.1672	25.2913	0.432706	1.65202e-05	0.00169447	TRUE	FALSE
Rpl36	339.186	378.353	378.487	456.354	441.709	438.041	443.734	-0.284362	1.77022e-05	0.00179992	FALSE	TRUE
BC068157	7.0759	5.90786	6.27724	3.03616	3.6192	4.08212	2.73072	0.92951	1.79147e-05	0.00180583	TRUE	FALSE
Abcc9	4.93601	10.3137	11.4207	4.13083	4.10287	4.97144	3.00236	1.13396	1.82665e-05	0.00181934	TRUE	FALSE
Rad23a	30.0583	34.0828	34.9396	44.3238	40.8119	42.1479	42.7193	-0.363373	1.83599e-05	0.00181934	FALSE	TRUE
Nid2	138.237	140.9	147.418	114.445	120.001	121.982	106.469	0.2971	2.13419e-05	0.00209707	TRUE	FALSE
Snrpa1	114.926	142.001	137.09	174.3	155.425	163.883	166.259	-0.328655	2.21371e-05	0.00215708	FALSE	TRUE
Garnl3	14.1803	24.2322	27.0723	8.44755	6.50455	16.6492	6.79105	1.18457	2.27823e-05	0.0022016	TRUE	FALSE
Tagln2	37.8047	38.8141	40.7053	53.866	51.2692	47.6442	47.28	-0.354194	2.45401e-05	0.00235203	FALSE	TRUE
5930412G12Rik	7.38975	5.25699	6.06985	3.30467	3.13553	3.10533	3.80299	0.901082	2.50593e-05	0.00236305	TRUE	FALSE
Rasgef1b	12.3971	7.44741	6.775	15.8417	18.5463	12.5817	21.6456	-0.951577	2.49806e-05	0.00236305	FALSE	TRUE
Ccdc102a	35.1512	35.8352	33.5846	49.3015	44.3644	40.8795	46.2935	-0.374482	2.86075e-05	0.00266762	FALSE	TRUE
Khsrp	290.04	386.815	372.113	247.602	228.126	293.898	279.577	0.414642	2.87454e-05	0.00266762	TRUE	FALSE
Hsd11b2	49.6882	27.9247	23.9337	56.3032	69.0817	49.4665	69.5117	-0.852044	2.97001e-05	0.00273451	FALSE	TRUE
Map6	9.04459	10.1385	10.9644	6.65064	5.07021	6.91044	5.70448	0.724441	3.00008e-05	0.00274062	TRUE	FALSE
Hnrnpdl	362.925	379.255	381.709	479.631	432.936	433.025	492.558	-0.294684	3.09222e-05	0.00280289	FALSE	TRUE
Orc6	64.4534	62.6959	67.3075	78.5065	77.5709	82.59	80.7062	-0.300992	3.55036e-05	0.00319342	FALSE	TRUE
Rab34	63.626	59.1287	59.5094	79.5805	75.7697	70.4311	79.734	-0.33005	3.70884e-05	0.0033105	FALSE	TRUE
Vcpkmt	16.9479	18.5497	14.6285	24.1447	23.0161	22.2621	23.6614	-0.477247	3.8651e-05	0.00342383	FALSE	TRUE
Ankrd10	88.3631	89.2187	92.1123	111.615	113.696	101.936	111.187	-0.285847	4.57084e-05	0.00401856	FALSE	TRUE
Tspan13	41.3426	36.2858	38.3271	25.9416	31.2719	28.327	31.2102	0.404192	4.84746e-05	0.00422995	TRUE	FALSE
Gm8994	0.0142659	0.0500666	0.0691326	5.2255	4.70329	0.029158	0.0142969	-5.74478	4.98554e-05	0.00431619	FALSE	TRUE
Nme1	222.12	244.137	239.545	289.902	272.841	277.628	293.43	-0.268732	5.02011e-05	0.00431619	FALSE	TRUE
Snhg5	26.6773	31.0538	30.3907	47.4839	35.0579	39.4508	37.0291	-0.435472	5.12502e-05	0.00437423	FALSE	TRUE
Pacsin1	9.01606	8.07324	7.0377	4.87438	5.0035	4.35912	5.06112	0.737226	5.3015e-05	0.00449206	TRUE	FALSE
Tchp	23.4817	23.8693	21.5417	29.9485	29.3038	29.6245	30.5383	-0.378421	5.79043e-05	0.00487105	FALSE	TRUE
Zfp871	145.042	130.937	149.257	103.353	117.349	124.563	102.08	0.341668	5.87862e-05	0.00490991	TRUE	FALSE
Rragd	56.4645	51.3558	48.6556	59.7525	67.1803	73.3469	69.3687	-0.37071	5.9745e-05	0.0049546	FALSE	TRUE
Cxadr	84.3686	74.5992	75.8662	53.2671	67.3304	58.5055	62.3775	0.37429	6.07683e-05	0.00500397	TRUE	FALSE
Msx1	137.566	144.98	120.139	107.009	91.5807	75.6358	114.518	0.466035	6.4222e-05	0.00525139	TRUE	FALSE
Atp6v0e2	5.80623	7.09694	6.23576	3.22205	3.83602	3.67391	4.00314	0.790471	6.89302e-05	0.00559722	TRUE	FALSE
Phyhip	4.72202	3.40453	3.6502	1.09467	1.71787	1.22464	2.73072	1.20696	7.00976e-05	0.00565277	TRUE	FALSE
Tlr2	3.01011	3.06658	2.95888	1.94149	1.45102	1.51622	1.37251	0.944679	7.4508e-05	0.00596727	TRUE	FALSE
Kif16b	33.0256	25.8844	25.8971	18.0104	21.5317	21.2124	20.1587	0.481809	7.52425e-05	0.00598511	TRUE	FALSE
Dennd1b	41.9418	37.8754	40.4702	31.7661	27.6026	30.7179	34.0124	0.369671	7.57708e-05	0.00598641	TRUE	FALSE
Gdf6	14.8794	15.0826	14.7667	10.5543	10.3239	10.7593	10.594	0.497757	7.81648e-05	0.0060932	TRUE	FALSE
Rspo3	7.63227	6.12064	6.55377	8.50951	13.6596	11.0509	12.4812	-0.756779	7.78554e-05	0.0060932	FALSE	TRUE
Irf2bpl	63.2123	47.8637	52.9556	35.3393	43.6639	40.7629	42.4047	0.430718	7.89567e-05	0.00611417	TRUE	FALSE
Arhgap5	149.35	144.943	160.346	116.304	127.923	131.882	121.981	0.283087	8.23059e-05	0.00624937	TRUE	FALSE
Gas5	122.544	128.158	133.62	190.617	152.807	152.686	151.49	-0.33737	8.20347e-05	0.00624937	FALSE	TRUE
Heatr5b	38.3611	35.3095	36.82	23.8142	27.9029	31.6802	27.2357	0.411906	8.19521e-05	0.00624937	TRUE	FALSE
Bend4	118.122	116.78	117.636	103.126	94.5495	99.006	91.9436	0.274723	8.2996e-05	0.00626111	TRUE	FALSE
Mdc1	195.229	187.224	205.421	162.156	169.402	164.203	153.22	0.272388	8.54054e-05	0.0063608	TRUE	FALSE
Rhoc	65.88	56.763	57.4354	72.8266	86.4271	72.9679	77.0462	-0.365382	8.53429e-05	0.0063608	FALSE	TRUE
Fam213a	21.941	22.0543	18.3478	13.5285	15.5109	14.8852	15.6266	0.480295	8.64565e-05	0.00639833	TRUE	FALSE
Efna5	58.5188	61.0187	65.6622	47.959	47.3498	54.8462	45.979	0.332051	8.89226e-05	0.00653945	TRUE	FALSE
2210039B01Rik	0.798891	0.538216	0.732806	1.03271	2.40168	1.69116	1.58696	-1.28647	9.70809e-05	0.00705127	FALSE	TRUE
Cdk6	11.6125	13.7308	14.3519	22.2032	17.9959	16.8825	18.872	-0.519581	9.70883e-05	0.00705127	FALSE	TRUE
Atf4	129.891	149.061	146.34	180.166	158.044	182.004	171.62	-0.286819	0.000100292	0.00723899	FALSE	TRUE
Trps1	127.552	105.227	115.009	87.553	98.2354	85.6953	96.3471	0.333985	0.000103182	0.00740191	TRUE	FALSE
Aass	19.2019	14.5944	14.6699	7.22896	11.1411	7.18745	12.1667	0.774972	0.000104632	0.00742624	TRUE	FALSE
Dbi	88.1919	83.2483	84.2174	56.4272	68.2311	67.3695	74.5299	0.354052	0.000104792	0.00742624	TRUE	FALSE
Large	29.0454	29.8021	28.5656	24.0621	21.8987	22.9619	21.474	0.36737	0.000108019	0.00760884	TRUE	FALSE
Alx3	63.5689	98.2182	112.852	68.3859	44.6646	67.8215	57.7453	0.618022	0.000109808	0.00764274	TRUE	FALSE
Gls2	2.31108	2.54088	2.25372	0.970745	1.26755	0.947635	1.48688	1.01454	0.00010974	0.00764274	TRUE	FALSE
Sepp1	37.5051	31.4669	31.9255	24.1034	25.0509	28.0646	20.0586	0.467631	0.000112653	0.0077944	TRUE	FALSE
Aff3	134.014	115.253	120.83	77.639	105.841	79.0765	103.31	0.431339	0.000114032	0.00781435	TRUE	FALSE
Epb4.1l3	83.4699	76.9899	80.5395	65.7628	64.6119	69.5272	58.646	0.31368	0.000114278	0.00781435	TRUE	FALSE
Mthfd2	75.0387	100.471	94.6426	136.813	104.406	120.977	111.573	-0.394973	0.000119671	0.00813552	FALSE	TRUE
N4bp3	22.2691	22.4549	25.0537	33.5837	29.4373	28.7935	29.4231	-0.381112	0.000122502	0.00823226	FALSE	TRUE
Psmg4	15.5071	21.2658	20.0899	28.3169	25.8181	25.4695	24.4621	-0.455688	0.000122087	0.00823226	FALSE	TRUE
Scn2b	38.7605	46.0488	49.8861	39.0364	33.9071	32.9194	31.1244	0.391811	0.000130428	0.00871484	TRUE	FALSE
Slc15a2	0.656232	7.35979	0.414796	0.4957	0.350245	0.524844	0.457502	2.61651	0.000131425	0.00873155	TRUE	FALSE
Cacna1e	0.356648	0.11265	0.470102	1.11532	2.43504	0.364475	1.61555	-2.14121	0.000136069	0.0088886	FALSE	TRUE
Med10	36.4922	42.106	42.4751	48.9297	50.1851	49.7727	51.712	-0.313374	0.000135355	0.0088886	FALSE	TRUE
Obsl1	167.468	174.094	213.827	222.569	234.381	228.774	231.096	-0.308155	0.000134676	0.0088886	FALSE	TRUE
Disp1	70.7875	72.4839	74.1378	60.1243	61.5931	55.6189	60.6047	0.285027	0.000143618	0.00928242	TRUE	FALSE
Zfhx2	23.9239	19.163	18.6935	12.9708	16.4782	13.0919	14.4971	0.52963	0.000143686	0.00928242	TRUE	FALSE
Pdgfrb	174.173	148.36	153.931	125.123	135.978	115.247	132.79	0.319288	0.000144535	0.009286	TRUE	FALSE
Asb4	798.72	577.806	557.942	425.785	479.502	316.51	517.621	0.56836	0.000146951	0.00938958	TRUE	FALSE
Ift172	62.6131	54.4975	54.2	42.2171	46.5326	45.953	46.6509	0.332247	0.000151325	0.00961655	TRUE	FALSE
Invs	24.5088	19.0128	28.1093	16.3787	17.1286	16.8533	17.2564	0.497551	0.000155826	0.00979608	TRUE	FALSE
Vps13a	27.9897	30.5281	34.4557	17.9691	23.5165	25.9506	22.4176	0.462875	0.000155426	0.00979608	TRUE	FALSE
Gm13154	2.5108	0.2253	0.262704	5.86578	5.40378	5.26302	5.17549	-2.44123	0.00016074	0.00999752	FALSE	TRUE
Tenm3	353.253	314.343	345.705	241.654	294.923	281.695	274.044	0.306551	0.000159905	0.00999752	TRUE	FALSE
2410002F23Rik	76.2799	78.9926	75.4652	97.8801	87.3278	91.6582	93.745	-0.268346	0.000162832	0.010074	FALSE	TRUE
Park7	127.209	145.919	184.363	204.993	187.048	195.898	196.897	-0.363556	0.00016371	0.0100751	FALSE	TRUE
AI506816	27.0196	4.91904	34.6355	47.8557	66.4131	79.8054	66.4093	-1.5533	0.000165453	0.010129	FALSE	TRUE
Nav1	107.166	113.488	130.799	90.775	101.771	96.8191	91.3002	0.29975	0.000168988	0.0102915	TRUE	FALSE
Gulo	2.06856	0.951266	0.483928	0.103271	0.416958	0.29158	0.528987	1.77498	0.000175423	0.0106281	TRUE	FALSE
Fam196b	3.78047	3.34195	3.15245	1.2599	2.01808	2.24517	1.55837	0.946123	0.000176971	0.0106666	TRUE	FALSE
Kcne3	2.71052	1.91505	2.51643	4.79176	7.0049	3.11991	5.04682	-1.06762	0.000181987	0.0109127	FALSE	TRUE
Cdh22	0.713296	0.575766	0.193571	0.722896	3.16888	0.918477	4.06033	-2.16396	0.000184789	0.0110242	FALSE	TRUE
Arrb1	67.5063	61.6445	63.5744	80.3653	73.4514	88.5528	76.9747	-0.313713	0.000188355	0.0111432	FALSE	TRUE
Crat	41.8705	39.3649	38.977	28.1516	32.0224	34.6834	30.8528	0.34953	0.000188945	0.0111432	TRUE	FALSE
Leng8	57.7342	58.7281	60.4496	83.3602	69.065	69.2502	71.5419	-0.313274	0.000189643	0.0111432	FALSE	TRUE
Hoxd10	42.4696	47.8011	46.388	64.8747	54.0378	52.1199	59.318	-0.337464	0.000192605	0.0112606	FALSE	TRUE
Cln5	27.6759	24.032	21.3205	18.7953	18.1627	17.3344	17.2278	0.445561	0.000194408	0.0113095	TRUE	FALSE
Clstn3	9.08739	6.18323	6.92709	3.18074	4.03616	3.7468	5.27557	0.86252	0.000197453	0.0114298	TRUE	FALSE
Mcm8	47.4912	47.6884	48.0887	33.501	34.6242	35.3541	44.2633	0.369777	0.000199958	0.0114612	TRUE	FALSE
Myog	0.0427978	0.03755	0.0138265	0	0.984022	3.79054	0	-5.16883	0.00020175	0.0114612	FALSE	TRUE
Pnpla6	34.766	37.9004	38.4654	30.217	29.2038	30.7763	28.4652	0.320728	0.000201501	0.0114612	TRUE	FALSE
Snai2	34.6234	30.3028	26.3119	21.1705	21.882	25.4841	21.2595	0.437375	0.000201917	0.0114612	TRUE	FALSE
Arhgap8	2.71052	2.54088	2.58556	3.82102	4.80336	4.51949	5.23268	-0.816273	0.000203467	0.0114816	FALSE	TRUE
Copa	269.241	289.21	292.182	237.853	232.996	255.409	223.604	0.255868	0.000205064	0.0114816	FALSE	FALSE
Dab2	54.9381	47.1502	48.2269	38.0863	34.9411	45.1512	33.1117	0.405497	0.000205221	0.0114816	TRUE	FALSE
2700049A03Rik	48.661	47.1502	47.826	36.3307	40.7785	39.9902	37.5295	0.308218	0.000215222	0.011927	TRUE	FALSE
Fzd3	128.778	126.669	143.381	99.2432	114.33	116.778	104.94	0.288516	0.00021494	0.011927	TRUE	FALSE
Adrm1	127.751	146.044	135.182	166.617	156.326	162.658	164.229	-0.252846	0.000221597	0.0122223	FALSE	FALSE
Plxna2	77.5067	90.7207	105.745	61.4048	65.6126	83.6397	55.1433	0.458555	0.000224956	0.0123152	TRUE	FALSE
Syne2	220.822	170.715	228.884	129.667	175.256	156.578	162.256	0.407062	0.000225388	0.0123152	TRUE	FALSE
Sc5d	40.1728	37.3872	39.2259	28.0483	32.7062	28.8664	32.9258	0.344823	0.000227298	0.0123618	TRUE	FALSE
Zfhx3	161.419	125.855	157.65	94.2036	120.851	123.572	115.405	0.385402	0.000231478	0.0125309	TRUE	FALSE
Tenm4	57.2777	44.6093	49.9552	56.7989	78.9219	68.1277	67.7675	-0.424453	0.000234127	0.0126159	FALSE	TRUE
Cenpe	207.854	186.26	210.661	135.45	175.106	174.54	150.575	0.342909	0.000237017	0.012713	TRUE	FALSE
Cxxc5	129.463	121.912	122.558	101.474	109.36	94.2095	106.312	0.277426	0.000242572	0.0128927	TRUE	FALSE
Gucy1a2	30.9713	20.0392	23.035	14.1068	17.2454	17.8593	17.8712	0.556076	0.000241873	0.0128927	TRUE	FALSE
Irak1bp1	8.68794	8.79921	7.02388	12.1033	12.442	11.6632	11.9665	-0.559321	0.000249724	0.0132128	FALSE	TRUE
Utp14b	25.1508	26.4602	20.9472	15.945	17.679	19.0693	18.6289	0.43886	0.000257918	0.0135849	TRUE	FALSE
Ahnak	101.202	77.1777	91.9326	56.0967	67.1803	75.6942	73.0431	0.405281	0.000261001	0.0136856	TRUE	FALSE
Cers4	12.0832	11.0397	10.9506	7.58008	7.42186	7.96013	8.12066	0.546703	0.000267389	0.0138959	TRUE	FALSE
Col1a2	601.879	263.801	250.799	156.166	238.617	154.727	241.404	0.912348	0.000267107	0.0138959	TRUE	FALSE
Pdlim4	50.8009	51.2557	52.5408	70.7818	63.6278	56.654	65.2798	-0.313946	0.000268842	0.0139096	FALSE	TRUE
Irx3	139.235	155.945	172.859	134.686	116.948	132.654	128.029	0.284726	0.000272064	0.0139528	TRUE	FALSE
Wsb1	110.119	94.0501	93.412	124.193	121.201	116.224	125.113	-0.294847	0.000270888	0.0139528	FALSE	TRUE
Cirbp	36.264	34.6461	32.5062	40.4615	41.6124	44.6409	45.4786	-0.321144	0.000276343	0.0141104	FALSE	TRUE
Senp7	42.1558	37.3998	37.3869	29.9279	33.1065	30.9221	29.3516	0.338389	0.000279291	0.0141989	TRUE	FALSE
Zfp518a	59.9739	59.5542	59.8965	42.2171	49.9183	53.5924	42.9337	0.3421	0.000281189	0.0142335	TRUE	FALSE
Grem1	24.0095	23.8067	25.0813	32.7575	34.5075	26.0089	39.9885	-0.455365	0.000286502	0.01444	FALSE	TRUE
Efemp1	2.53933	1.99015	2.40582	0.826166	1.16748	1.50164	1.17235	0.976319	0.000289017	0.0145042	TRUE	FALSE
Rnpep	72.2997	76.4642	79.3643	71.8971	51.2358	58.5201	53.685	0.370922	0.000300889	0.0150355	TRUE	FALSE
Stom	5.29266	4.11798	3.77464	7.00176	7.02158	8.00387	6.91972	-0.720188	0.000303237	0.0150883	FALSE	TRUE
Ccser1	3.15277	2.9289	2.53025	4.85373	4.93679	5.2047	4.56072	-0.767856	0.000305362	0.0151296	FALSE	TRUE
Get4	107.979	118.958	118.258	140.18	130.074	136.401	135.621	-0.236397	0.000309261	0.0152582	FALSE	FALSE
Ccdc141	2.71052	3.11665	3.29071	6.29952	4.90343	7.46445	4.01744	-0.898634	0.000312478	0.0153521	FALSE	TRUE
Smg5	150.505	157.322	153.295	186.342	181.444	175.05	180.442	-0.234212	0.000314443	0.015384	FALSE	FALSE
Sec23b	81.2729	81.4083	87.8676	70.5546	72.1505	65.2556	69.669	0.267139	0.000317161	0.0154524	TRUE	FALSE
Fbln5	18.1748	14.8823	13.2873	9.17045	9.87357	9.78251	12.5527	0.576917	0.000319701	0.0155115	TRUE	FALSE
Isoc1	117.537	105.077	108.58	137.144	123.753	132.509	136.65	-0.263477	0.000323926	0.0156515	FALSE	TRUE
Vars	322.481	352.444	360.305	313.055	262.584	298.447	272.643	0.26759	0.00032751	0.0157596	TRUE	FALSE
2010015L04Rik	3.19557	3.41705	4.00969	6.13429	5.60392	5.7587	5.83315	-0.719325	0.00032889	0.0157611	FALSE	TRUE
Oxsr1	97.5076	109.671	107.667	89.4119	88.9622	89.7046	85.5958	0.247453	0.000333693	0.015926	FALSE	FALSE
Prrx1	843.287	620.05	641.399	496.629	582.974	454.5	575.123	0.411936	0.000339272	0.0161265	TRUE	FALSE
Epha7	52.9551	43.2826	47.2867	26.9124	41.5124	34.0274	36.9433	0.456254	0.000350546	0.0165949	TRUE	FALSE
Snhg3	10.5853	13.7433	14.4072	26.1688	16.3448	18.8944	17.0277	-0.601072	0.00035471	0.0167243	FALSE	TRUE
Kat6b	78.7193	69.3673	71.9394	55.601	62.9607	55.3419	62.7779	0.309409	0.00036032	0.0169206	TRUE	FALSE
Cdh24	31.9985	28.5755	29.4505	37.1775	39.9279	34.2752	41.0894	-0.345361	0.000362374	0.016949	FALSE	TRUE
Rmrp	0.271052	0.788549	0.566888	0.330467	0.90063	4.91312	6.83394	-2.57747	0.000367453	0.017118	FALSE	TRUE
Fancl	21.2705	15.821	16.0803	22.637	24.3337	24.449	26.049	-0.460157	0.000369289	0.0171353	FALSE	TRUE
Fgd3	1.94016	1.46445	1.7698	3.32532	3.06881	2.71169	3.37408	-0.855044	0.000371243	0.0171579	FALSE	TRUE
Kidins220	71.9573	66.5636	69.4783	49.2602	58.541	61.6983	51.9122	0.324314	0.000374124	0.0172229	TRUE	FALSE
1700048O20Rik	6.80484	8.97444	7.75668	9.6868	11.0911	14.1708	13.239	-0.619722	0.000390926	0.0177668	FALSE	TRUE
Arid5b	28.7744	26.6855	26.381	15.9863	21.9987	23.1806	17.6424	0.468348	0.000393536	0.0177668	TRUE	FALSE
Gm14322	16.6626	12.2914	17.9054	12.1446	9.97364	10.8176	9.07856	0.573313	0.000393527	0.0177668	TRUE	FALSE
Luc7l3	198.453	180.503	189.921	233.64	225.258	221.324	219.301	-0.245955	0.00039108	0.0177668	FALSE	FALSE
Mir17hg	19.53	18.7875	18.1542	45.9762	24.8841	23.2972	25.9489	-0.672418	0.000393138	0.0177668	FALSE	TRUE
Dock6	75.4096	77.8536	78.0508	93.8525	94.1659	92.0081	86.7538	-0.249778	0.000397196	0.0178631	FALSE	FALSE
Popdc2	1.05568	1.92756	2.15694	8.73671	2.20154	6.40018	2.54486	-1.53307	0.000409796	0.0183592	FALSE	TRUE
Sox5	41.6993	27.2237	24.8186	17.8658	23.8667	18.0634	22.775	0.597473	0.000415831	0.0185584	TRUE	FALSE
Ddr1	40.1871	35.4221	34.3313	27.7385	28.0196	28.4436	31.2817	0.343406	0.000420779	0.0185667	TRUE	FALSE
Kazn	22.7684	23.2309	22.7723	29.9279	27.0523	28.7352	29.466	-0.328719	0.000420021	0.0185667	FALSE	TRUE
Tgfbr2	35.0799	35.4972	38.9217	31.5182	29.1704	29.0122	26.8068	0.326369	0.00041832	0.0185667	TRUE	FALSE
Hey1	26.8342	23.0932	23.6019	32.7781	36.9592	26.4317	36.7431	-0.439091	0.000423812	0.0186302	FALSE	TRUE
Polr3d	55.1948	58.1273	56.4675	78.2173	62.6605	66.2032	72.1566	-0.302199	0.000426643	0.0186844	FALSE	TRUE
Wdtc1	68.1626	70.6315	66.0908	55.2292	60.3422	55.5168	55.272	0.27129	0.000438404	0.0191278	TRUE	FALSE
Tecr	132.687	138.772	134.2	158.004	162.814	151.68	164.458	-0.235847	0.00044234	0.0192278	FALSE	FALSE
Ppp1r14b	339.686	399.92	385.318	459.865	435.154	427.252	461.562	-0.250051	0.000448372	0.0194178	FALSE	FALSE
Snhg4	7.28988	9.61279	9.70622	18.0311	11.1745	13.8209	12.181	-0.635941	0.000453846	0.0195824	FALSE	TRUE
Lrp1	267.201	246.728	311.498	178.514	222.556	252.523	191.236	0.381358	0.000474558	0.020326	TRUE	FALSE
Postn	4.08005	4.81891	5.14347	15.0982	7.67203	11.1675	4.83237	-1.04802	0.000472899	0.020326	FALSE	TRUE
Etnk1	167.796	156.17	162.365	136.462	138.147	137.509	139.595	0.232958	0.00048144	0.0205456	FALSE	FALSE
Amdhd2	19.9866	20.7401	19.6198	14.4992	14.9271	14.8123	16.8561	0.396496	0.000485173	0.0206296	TRUE	FALSE
Zfp429	1.45512	1.17657	1.25821	2.31327	2.43504	2.33264	2.37329	-0.866755	0.000487918	0.0206711	FALSE	TRUE
Uqcrq	56.0365	62.8211	61.293	72.3309	70.1824	70.9706	73.8723	-0.258448	0.000490016	0.0206851	FALSE	FALSE
Mgat3	46.2929	40.2035	40.6915	32.0346	35.4581	31.7822	35.7995	0.327742	0.000491983	0.0206934	TRUE	FALSE
Fign	56.3076	67.7526	72.7552	51.5321	51.1858	57.8495	50.1251	0.316671	0.000520973	0.0218342	TRUE	FALSE
Cmah	88.7483	109.308	174.449	152.655	183.929	232.418	184.716	-0.601819	0.000552038	0.02289	FALSE	TRUE
Map1a	17.6755	20.1017	18.5967	14.7264	13.8263	15.0601	11.6663	0.444322	0.000550184	0.02289	TRUE	FALSE
Plcl1	2.04003	1.38935	2.26755	3.71775	4.11955	3.10533	3.10244	-0.886435	0.000550819	0.02289	FALSE	TRUE
Ttpal	43.8392	41.4552	40.1522	49.1156	50.9356	50.4579	52.77	-0.281682	0.000554324	0.0229036	FALSE	TRUE
Heyl	1.68338	1.48948	1.16143	1.65233	3.6192	3.10533	3.53134	-1.04621	0.000558768	0.0229472	FALSE	TRUE
Strap	299.156	331.729	329.279	393.4	363.538	377.304	367.917	-0.230555	0.000559306	0.0229472	FALSE	FALSE
2610507I01Rik	6.30554	10.3638	5.73801	0.74355	0.80056	0.860161	5.47573	1.91796	0.00057012	0.0231472	TRUE	FALSE
Nlrp5-ps	2.42521	0.750999	2.04633	0.619625	0.833917	0.364475	0.872113	1.36745	0.000566633	0.0231472	TRUE	FALSE
Pgm1	26.5203	27.2112	26.1874	33.6869	32.8563	33.7212	31.5247	-0.30624	0.000569228	0.0231472	FALSE	TRUE
Mycl	54.1534	51.6312	50.6881	59.7938	65.796	59.9197	70.8985	-0.297881	0.00057519	0.0232258	FALSE	TRUE
Rin2	18.7597	17.8738	15.7761	10.8641	12.5088	15.0164	10.6226	0.510725	0.000576028	0.0232258	TRUE	FALSE
Stk39	84.2402	84.575	87.7846	110.81	97.1346	105.231	95.5178	-0.256133	0.000587852	0.0236211	FALSE	FALSE
Dmpk	8.31703	7.93556	7.95025	14.1688	12.1919	10.8759	10.2366	-0.555046	0.000592876	0.0237414	FALSE	TRUE
Casd1	316.632	299.824	303.962	267.265	265.686	253.82	262.149	0.226529	0.000629538	0.0249532	FALSE	FALSE
Cdk2ap1	518.794	545.363	548.471	664.548	615.931	596.383	645.736	-0.230408	0.000626047	0.0249532	FALSE	FALSE
N4bp2	138.708	136.707	151.483	108.579	125.971	127.027	111.716	0.265953	0.000628207	0.0249532	TRUE	FALSE
Dab1	10.5425	7.77284	8.19913	6.07232	5.3871	5.23386	6.23347	0.624585	0.00064582	0.0252309	TRUE	FALSE
Galnt7	79.0047	85.9894	87.1348	72.5787	68.6981	72.3701	70.6126	0.242135	0.000643856	0.0252309	FALSE	FALSE
Kmt2e	136.839	123.94	130.177	98.9954	121.201	102.461	105.068	0.2852	0.000639054	0.0252309	TRUE	FALSE
Mrpl46	26.5631	33.1191	34.0271	39.9865	37.8932	37.9637	40.7463	-0.325307	0.00064539	0.0252309	FALSE	TRUE
Senp8	24.5659	24.2197	25.9247	19.5388	20.2141	19.5942	19.6011	0.335321	0.000647333	0.0252309	TRUE	FALSE
Jag1	23.1108	26.6229	26.4363	34.9881	29.4206	40.1214	29.4803	-0.399768	0.00065524	0.0253699	FALSE	TRUE
Tmem68	9.67229	9.22477	6.02837	14.0035	10.7408	14.0687	12.9387	-0.638549	0.000655197	0.0253699	FALSE	TRUE
Zfp811	6.87617	4.81891	5.64122	2.82962	3.90273	3.71764	3.20251	0.757005	0.000678137	0.0261698	TRUE	FALSE
Cdk5rap2	104.384	98.6312	103.27	79.0848	90.8636	85.9723	86.8825	0.252159	0.000686574	0.0264082	FALSE	FALSE
C2cd3	103.342	97.0041	99.4542	74.5202	90.9636	84.8498	79.5482	0.27676	0.000698651	0.0267847	TRUE	FALSE
Ankrd44	46.5782	40.2911	43.36	32.5716	36.8091	30.82	37.4866	0.334246	0.000702084	0.0268283	TRUE	FALSE
Zfp961	36.5065	39.4775	39.5715	30.8986	34.4408	29.9015	29.3516	0.306815	0.000709167	0.0270107	TRUE	FALSE
Klhl26	39.217	39.5026	38.5345	31.4769	35.0412	27.5835	30.7956	0.324403	0.000722061	0.0274125	TRUE	FALSE
Il1f9	0.841689	3.79255	3.53959	0.950091	1.11745	1.03511	1.27243	1.31449	0.000726428	0.0274891	TRUE	FALSE
Gmip	8.04598	9.42504	9.41587	16.1102	11.0911	11.9985	13.1961	-0.545737	0.000733536	0.0276685	FALSE	TRUE
Dnmt3b	57.1493	64.1979	60.975	75.904	67.9809	72.72	73.7293	-0.255865	0.000741029	0.0277032	FALSE	FALSE
Gm19757	3.12424	7.19708	6.775	3.16009	3.43574	2.31806	2.97376	0.940848	0.000741564	0.0277032	TRUE	FALSE
Rpph1	0.114127	0.212783	0.649847	0.537008	0.383602	2.11395	3.61713	-2.35086	0.000741158	0.0277032	FALSE	TRUE
Prelid1	228.854	233.423	245.822	281.888	278.178	268.414	270.984	-0.21967	0.000746331	0.0277925	FALSE	FALSE
3110045C21Rik	2.49654	4.01785	4.14796	1.87953	0.567063	2.3618	0.686253	1.37263	0.000758452	0.0281542	TRUE	FALSE
AI414108	7.71786	10.0634	10.5911	6.46475	6.27105	6.47307	6.31925	0.56776	0.000779634	0.0288489	TRUE	FALSE
Enc1	48.9178	51.2181	42.9314	56.2619	63.5111	64.0601	54.2998	-0.320043	0.000785669	0.0289805	FALSE	TRUE
Lamb2	45.2515	33.9952	35.465	27.5113	31.4553	30.7325	27.4215	0.38456	0.000797576	0.0293272	TRUE	FALSE
Dcp2	380.315	372.283	398.771	333.627	321.158	329.194	338.208	0.215444	0.000802732	0.0294243	FALSE	FALSE
Ptprz1	4.62216	4.89401	5.35087	2.91224	2.68521	3.61559	2.94517	0.703405	0.000816458	0.0296935	TRUE	FALSE
Slc25a33	15.1076	18.5121	17.7809	23.711	20.7979	21.5186	23.2754	-0.381094	0.00081391	0.0296935	FALSE	TRUE
Tmem37	0.870221	1.02637	1.36883	2.18934	1.81794	2.97412	1.70134	-0.995123	0.000817694	0.0296935	FALSE	TRUE
Use1	33.7389	35.0216	34.6908	41.3909	40.5951	40.3109	44.7208	-0.276129	0.000829926	0.0300444	FALSE	TRUE
Ptgis	22.5972	20.6525	19.924	28.7093	24.6506	30.9512	25.0911	-0.377158	0.000834926	0.0301321	FALSE	TRUE
Cbx7	2.31108	2.37816	2.61321	0.660933	0.683812	1.7349	1.47258	1.08417	0.000842135	0.0302537	TRUE	FALSE
Lcp1	26.9341	30.9161	28.856	24.4339	20.8312	24.2157	22.246	0.334436	0.000843472	0.0302537	TRUE	FALSE
Adh1	2.06856	3.27936	4.60423	5.96905	6.10427	18.2383	4.48924	-1.3911	0.000866115	0.0308783	FALSE	TRUE
Tmem158	6.4054	8.79921	7.5078	11.6489	10.3072	11.8381	10.4511	-0.545787	0.000866165	0.0308783	FALSE	TRUE
Lypd6	10.1431	9.33742	9.05638	12.1033	13.276	14.4478	13.0245	-0.474987	0.00087537	0.0310997	FALSE	TRUE
Npnt	43.0831	37.55	34.2068	26.2721	31.0717	32.0884	30.0379	0.357089	0.000877696	0.0310997	TRUE	FALSE
Slc7a5	68.2339	84.913	81.2309	123.925	97.7517	120.568	78.6332	-0.429188	0.000883967	0.031135	FALSE	TRUE
Trmt1	53.754	62.6959	62.7586	80.3653	69.7822	69.5127	70.6269	-0.28015	0.000884017	0.031135	FALSE	TRUE
Cux2	16.8908	14.244	15.9282	7.58008	6.8548	14.302	9.92208	0.696671	0.000890385	0.0311715	TRUE	FALSE
Lsp1	35.8788	34.6461	33.239	45.9348	46.7994	53.2717	35.4278	-0.390954	0.000888806	0.0311715	FALSE	TRUE
Rimklb	63.4976	67.9028	67.3628	54.1965	54.1379	48.3002	60.9193	0.284698	0.000894975	0.0312386	TRUE	FALSE
Nbea	83.0276	75.7883	87.1486	58.9057	69.1984	71.5683	68.9398	0.287272	0.000906876	0.0315598	TRUE	FALSE
Timm23	142.288	177.399	172.998	216.848	180.76	198.61	199.242	-0.275885	0.000914218	0.0317209	FALSE	TRUE
Edil3	9.52963	6.63383	7.48015	4.79176	5.45382	5.37965	3.43127	0.726296	0.000917868	0.0317533	TRUE	FALSE
Kcnn1	8.10304	5.87031	5.50296	3.92429	4.78668	2.25974	3.08814	0.887156	0.000923878	0.0317732	TRUE	FALSE
Zfp839	12.9107	10.877	12.195	8.24101	8.75613	8.98066	8.14925	0.490677	0.000923292	0.0317732	TRUE	FALSE
1190002N15Rik	51.5998	48.4269	48.78	39.656	40.9453	43.8828	39.6454	0.273246	0.000938371	0.0320829	TRUE	FALSE
Brca1	114.056	103.588	112.147	90.7957	98.5022	92.4308	90.3138	0.241015	0.00093578	0.0320829	FALSE	FALSE
Usp40	64.5105	58.3902	54.1032	48.2068	46.8995	48.5189	50.1966	0.283874	0.000944792	0.0322083	TRUE	FALSE
Pgap1	24.8084	19.2381	18.9285	12.0001	17.3955	15.2059	14.926	0.494941	0.00094757	0.0322091	TRUE	FALSE
Synrg	29.8158	25.6967	26.0215	18.217	21.8486	22.6412	21.1595	0.373012	0.000967592	0.0327944	TRUE	FALSE
Tmem230	22.6971	18.024	23.27	16.8744	15.4108	15.9494	16.2842	0.40304	0.00097535	0.0329618	TRUE	FALSE
Peg10	1723.98	1733.02	2089.49	1557.92	1440.04	1700.58	1372.51	0.284667	0.00099095	0.0333924	TRUE	FALSE
Calm1	531.534	556.54	533.732	641.291	655.742	583.568	654.828	-0.229561	0.00101874	0.0342302	FALSE	FALSE
Alyref	240.909	263.613	253.357	324.456	287.801	279.858	296.59	-0.234134	0.00102325	0.0342831	FALSE	FALSE
Nfya	138.85	149.436	145.856	116.903	127.356	123.601	128.93	0.220384	0.00103416	0.0344512	FALSE	FALSE
Vps13d	51.2432	47.1377	50.7434	32.5716	41.1955	44.7721	38.4302	0.340037	0.0010339	0.0344512	TRUE	FALSE
Cpne3	71.244	72.9345	74.442	58.3067	60.9093	64.8036	62.3489	0.242212	0.00104466	0.0347023	FALSE	FALSE
Aars	183.788	214.748	207.771	241.468	222.689	245.714	239.116	-0.231238	0.00105232	0.0347035	FALSE	FALSE
Chsy1	110.418	106.467	116.516	134.252	126.655	128.864	128	-0.21994	0.00104876	0.0347035	FALSE	FALSE
Fignl1	120.119	97.4672	118.106	79.3533	76.1366	109.401	77.5037	0.386201	0.0010536	0.0347035	TRUE	FALSE
Msh2	176.427	182.155	192.41	159.843	157.894	159.8	157.852	0.209447	0.00107132	0.0351305	FALSE	FALSE
Stab2	3.1813	2.87883	3.62255	2.08607	1.78458	2.17227	1.37251	0.80162	0.00107257	0.0351305	TRUE	FALSE
C1qtnf1	2.61066	2.7036	2.54408	0.970745	1.30091	1.70574	1.78712	0.852368	0.00109503	0.0356662	TRUE	FALSE
Impdh1	51.9422	64.6235	61.9705	90.0521	66.9635	71.5829	72.4426	-0.338007	0.00109413	0.0356662	FALSE	TRUE
Spice1	32.9543	28.3002	31.483	24.4132	25.7347	23.7638	25.1626	0.319366	0.00111128	0.0360951	TRUE	FALSE
Aprt	69.1326	77.6283	77.9125	96.1038	87.1777	85.0393	87.3829	-0.247303	0.00112551	0.036125	FALSE	FALSE
Hmgcr	250.481	272.713	255.404	186.569	235.682	204.966	230.724	0.27489	0.00112082	0.036125	TRUE	FALSE
Nek7	62.6274	66.4509	67.8883	58.6578	53.6876	55.1378	54.4999	0.242979	0.00112434	0.036125	FALSE	FALSE
Nucks1	541.006	489.614	507.765	445.51	366.173	476.252	389.577	0.290135	0.00112269	0.036125	TRUE	FALSE
Nusap1	98.8343	86.2898	86.4849	67.4565	83.0581	71.335	73.0574	0.29605	0.00112765	0.036125	TRUE	FALSE
Efnb2	154.414	144.868	146.948	126.899	131.192	121.151	129.63	0.225509	0.00113443	0.0361743	FALSE	FALSE
Lman2l	43.3256	40.6291	36.5988	31.8074	34.3907	31.928	32.3683	0.300622	0.00113538	0.0361743	TRUE	FALSE
Abi2	125.854	130.474	137.242	112.441	112.562	118.819	107.284	0.218189	0.00125533	0.0398134	FALSE	FALSE
Pex6	70.3024	78.0038	75.4514	65.0399	65.2456	60.0363	62.063	0.241781	0.00125859	0.0398134	FALSE	FALSE
Wdr74	43.2543	51.5561	49.9829	66.6716	52.7202	59.8176	58.403	-0.298936	0.00125981	0.0398134	FALSE	TRUE
Zfhx4	217.94	129.885	148.801	68.6957	133.043	93.0577	129.344	0.64244	0.00126458	0.0398565	TRUE	FALSE
Ocel1	2.11136	2.1028	1.88041	1.46645	1.25088	0.656055	0.614768	1.03942	0.00127907	0.0402047	TRUE	FALSE
Asxl3	72.8275	62.9212	67.4596	46.8436	59.8919	58.695	51.8693	0.317699	0.00128401	0.0402517	TRUE	FALSE
Cd209c	1.32673	1.2767	1.47944	1.83822	2.08479	4.7236	2.60204	-1.05047	0.00131156	0.0410055	FALSE	TRUE
Gsc	5.20706	1.7273	1.74214	5.14289	12.2419	3.33859	12.6099	-1.52739	0.00134224	0.0417414	FALSE	TRUE
Ptpru	41.6993	35.71	38.8387	31.2291	31.3219	31.2136	33.1403	0.288	0.00134207	0.0417414	TRUE	FALSE
Ankrd12	23.3105	21.053	25.662	18.0104	16.8785	20.2065	17.0277	0.371964	0.00134906	0.0418424	TRUE	FALSE
Sfrp1	125.212	116.668	137.422	162.713	158.478	160.588	131.832	-0.278815	0.00136005	0.0420335	FALSE	TRUE
Wif1	17.3902	12.3164	11.4207	7.04307	10.6575	5.68581	9.93637	0.717883	0.00136241	0.0420335	TRUE	FALSE
Akap9	113.97	98.6563	123.568	75.1811	89.2958	105.552	84.7237	0.337045	0.00137844	0.0421941	TRUE	FALSE
Camk2a	1.99723	1.85246	1.78362	3.59382	3.11885	3.17822	2.73072	-0.746178	0.00137129	0.0421941	FALSE	TRUE
Lhfpl2	104.626	101.523	95.6519	85.3843	84.2089	91.2645	79.7054	0.240712	0.00137793	0.0421941	FALSE	FALSE
Zfp963	8.27423	5.93289	6.70587	4.27541	5.40378	3.17822	3.78869	0.7451	0.00138578	0.0423078	TRUE	FALSE
Col15a1	54.881	48.1015	56.191	44.2619	46.4325	39.13	43.5342	0.292015	0.00143329	0.0433926	TRUE	FALSE
Col23a1	63.141	42.2813	56.6888	78.0934	82.1742	86.5264	55.2005	-0.482539	0.00143987	0.0433926	FALSE	TRUE
Hif3a	18.1035	14.3566	15.5687	10.9467	12.7422	12.2026	11.266	0.440554	0.00143914	0.0433926	TRUE	FALSE
Speg	48.1189	42.494	43.7886	33.9967	36.4088	41.1565	31.1101	0.328516	0.00142895	0.0433926	TRUE	FALSE
Ttc28	115.839	102.098	115.866	82.6786	99.136	99.8078	83.4655	0.285492	0.00143322	0.0433926	TRUE	FALSE
Crcp	29.6446	34.2581	32.1052	39.1809	36.5923	39.9465	39.0163	-0.273281	0.0014453	0.0434446	FALSE	TRUE
Reep1	19.9723	20.0141	23.27	14.1068	14.3767	18.9381	15.8982	0.41212	0.00146892	0.0440414	TRUE	FALSE
Slc25a37	76.2799	71.9582	65.5792	77.4118	87.0943	118.965	88.112	-0.382642	0.00149929	0.0448367	FALSE	TRUE
Med9	40.2584	46.3867	46.6231	35.4632	32.5895	35.1645	41.1466	0.299326	0.00151016	0.0450468	TRUE	FALSE
Cep162	27.7757	27.9622	29.5611	19.5595	25.0008	23.5597	21.8028	0.33794	0.001518	0.0451652	TRUE	FALSE
Synj2bp	50.002	49.954	50.8678	36.0209	35.1079	50.0351	34.0982	0.372694	0.00152263	0.0451882	TRUE	FALSE
Nipal3	11.4841	9.36246	15.1815	6.87783	9.30651	7.42071	8.23504	0.592106	0.00153163	0.0453402	TRUE	FALSE
Guk1	43.4397	46.8498	49.8861	58.5545	54.8384	55.8376	53.4277	-0.252113	0.00154965	0.0457577	FALSE	FALSE
Mesdc1	170.178	174.144	167.73	209.371	193.635	185.97	205.99	-0.219424	0.00155635	0.0458397	FALSE	FALSE
Slc35e1	91.0166	96.2656	92.0985	107.133	103.189	109.94	111.144	-0.211826	0.00156185	0.0458861	FALSE	FALSE
Fndc4	46.193	53.5212	54.8637	71.484	59.2414	59.2053	61.4768	-0.285897	0.00157369	0.0459669	FALSE	TRUE
Poli	10.6994	15.1827	15.1539	7.27026	10.3239	10.7739	8.79262	0.556834	0.00157639	0.0459669	TRUE	FALSE
Usp2	4.49376	3.78003	3.5949	5.43204	6.07091	6.82297	6.50511	-0.651531	0.0015711	0.0459669	FALSE	TRUE
Tulp2	1.32673	1.89001	1.70066	3.16009	2.41836	2.37638	3.7315	-0.831515	0.00161755	0.0470497	FALSE	TRUE
Rfx3	49.4029	46.1113	51.6836	38.2102	41.429	44.4659	36.4	0.289803	0.00162763	0.0472256	TRUE	FALSE
Bmp4	69.7889	61.294	56.0113	83.4221	72.1838	72.5159	78.1471	-0.295797	0.00163996	0.0474656	FALSE	TRUE
Il17rd	275.446	265.078	266.257	236.387	223.69	196.204	246.779	0.252453	0.00164551	0.0475086	FALSE	FALSE
Cdkn1b	40.9147	33.6448	33.9994	30.3203	29.0203	28.0937	28.8369	0.31614	0.00166944	0.0479997	TRUE	FALSE
Dhx34	27.5618	28.5255	28.8421	24.6404	22.1989	23.4139	21.8743	0.298434	0.00167482	0.0479997	TRUE	FALSE
Kif26a	59.4318	64.6735	66.2982	75.1192	76.5369	72.6326	73.9295	-0.23206	0.00167526	0.0479997	FALSE	FALSE
Mvb12a	21.1564	20.6775	20.3941	25.384	23.9668	26.2859	27.5931	-0.315656	0.00168715	0.0479997	FALSE	TRUE
Sorl1	34.1383	29.9148	32.0637	19.89	26.4352	28.3562	23.8902	0.377286	0.00168439	0.0479997	TRUE	FALSE
Thg1l	30.7573	33.7073	33.3634	46.2447	38.4602	44.8013	34.5843	-0.330336	0.00168113	0.0479997	FALSE	TRUE
Sirpa	30.6432	29.5518	32.3126	25.0328	24.784	26.5775	24.605	0.288031	0.00169599	0.048134	TRUE	FALSE
Rnf17	1.72618	2.75366	3.01418	1.17729	1.40098	1.58911	1.42969	0.832318	0.00172161	0.0487427	TRUE	FALSE
Camsap3	19.5443	17.7862	18.2095	10.7815	14.4101	12.9607	16.0412	0.448525	0.00172683	0.0487725	TRUE	FALSE
Lars2	239.068	482.154	404.149	297.502	364.155	1962.8	2214.95	-1.68939	0.00181462	0.0511284	FALSE	FALSE
4930432K21Rik	2.39667	2.04021	1.93571	1.30121	1.03406	1.26837	1.28672	0.795725	0.00181902	0.0511293	FALSE	FALSE
Redrum	0.69903	1.15153	1.53474	1.96215	1.8513	3.1928	1.98727	-0.994676	0.00183145	0.0513552	FALSE	FALSE
Pcmtd2	53.6969	42.3313	42.0188	32.5923	38.0433	37.7596	37.5438	0.334048	0.00184415	0.0514644	FALSE	FALSE
Sox11	802.287	690.807	757.002	591.907	676.24	607.769	653.027	0.246445	0.00184282	0.0514644	FALSE	FALSE
Igdcc4	54.667	45.9361	50.5083	42.4856	42.5464	42.6581	36.8575	0.292287	0.00185136	0.0515428	FALSE	FALSE
Rnf126	86.2517	101.097	95.6657	120.827	104.373	107.083	112.76	-0.237622	0.00186041	0.0516717	FALSE	FALSE
Hfm1	2.28255	2.94141	3.33219	1.4871	1.45102	1.74948	1.98727	0.769118	0.00186796	0.0517585	FALSE	FALSE
Bves	2.39667	3.12916	3.95439	6.03101	4.63658	5.8316	4.54643	-0.733781	0.00188032	0.0518551	FALSE	FALSE
Smyd2	47.3486	58.2024	57.3248	75.2638	60.6758	65.8971	63.9502	-0.290783	0.00187651	0.0518551	FALSE	FALSE
Pbx1	452.215	368.478	386.534	279.926	355.549	344.75	328.358	0.298604	0.00191175	0.0525979	FALSE	FALSE
Ubr2	90.1891	104.326	112.935	80.5512	86.1436	94.0491	81.2638	0.261191	0.00193342	0.0530691	FALSE	FALSE
Cpa2	39.4167	36.6237	34.6631	45.6457	46.8328	39.3487	60.476	-0.381934	0.00195161	0.0534231	FALSE	FALSE
Helz	65.8657	72.4965	75.562	57.3566	60.2088	65.6784	55.9153	0.253999	0.00195545	0.0534231	FALSE	FALSE
Nfat5	70.2596	64.1228	71.5246	50.6647	59.8085	61.8004	54.8288	0.273063	0.00198407	0.0539095	FALSE	FALSE
Pam	28.0325	30.8535	31.7319	36.7437	37.2928	34.596	37.0291	-0.269384	0.00198709	0.0539095	FALSE	FALSE
Tomm40	135.911	175.496	172.804	220.69	175.556	195.475	195.525	-0.285924	0.00198203	0.0539095	FALSE	FALSE
Znf41-ps	3.79473	3.19175	3.09714	2.08607	1.91801	2.39096	1.78712	0.715656	0.00199251	0.0539314	FALSE	FALSE
Furin	72.0429	75.3377	73.5156	90.6304	84.6926	83.1732	84.7094	-0.220281	0.00205674	0.0555414	FALSE	FALSE
Cic	145.512	140.8	142.745	117.687	133.593	121.764	117.521	0.221707	0.00209462	0.0564341	FALSE	FALSE
Sort1	113.314	102.399	101.556	75.0572	95.1165	89.0777	90.4996	0.273935	0.00210413	0.05656	FALSE	FALSE
Pcdhga10	3.56648	2.05273	2.25372	1.42514	1.50105	1.35585	1.61555	0.828901	0.00211436	0.0567045	FALSE	FALSE
Pcbp4	345.92	372.896	375.141	435.782	420.811	400.412	422.932	-0.203738	0.00213187	0.0567835	FALSE	FALSE
Slc2a8	13.7238	13.2426	12.8034	9.27372	9.7735	10.803	9.60754	0.425463	0.0021312	0.0567835	FALSE	FALSE
Tbx18	69.6177	41.6429	38.9355	28.9158	39.094	24.1866	39.5453	0.603891	0.00212629	0.0567835	FALSE	FALSE
Sptan1	235.331	237.441	258.667	182.645	215.417	226.98	196.697	0.246901	0.00215859	0.0573645	FALSE	FALSE
Tnni1	0.998614	1.90253	1.02316	3.26336	1.86797	4.27165	1.80141	-1.09434	0.00218665	0.0579785	FALSE	FALSE
Yars	96.6373	118.946	110.391	143.257	119.25	134.141	122.568	-0.256173	0.00219167	0.0579801	FALSE	FALSE
Ehd3	23.5388	24.5827	25.662	18.7127	18.6297	22.4225	18.1285	0.336287	0.00221635	0.0585007	FALSE	FALSE
Smarca5-ps	2.11136	2.4032	2.5026	1.32187	1.3843	1.66201	1.07227	0.781388	0.0022275	0.0586624	FALSE	FALSE
Cdc42bpa	94.2407	86.9156	94.6841	74.1897	80.5564	81.8465	77.6467	0.22663	0.00228209	0.059965	FALSE	FALSE
Myd88	7.11869	6.90919	6.8303	4.91569	4.80336	4.94228	4.04603	0.572836	0.00233324	0.0611717	FALSE	FALSE
Rpl10a	770.303	802.055	815.862	968.845	883.601	897.687	904.71	-0.198799	0.00235158	0.0613772	FALSE	FALSE
Wdr86	34.4665	29.4892	35.7139	27.7179	24.1002	24.7697	29.5375	0.324282	0.00234749	0.0613772	FALSE	FALSE
Kansl2	157.995	172.079	168.96	198.776	187.331	186.946	191.307	-0.199912	0.00235723	0.0613876	FALSE	FALSE
Fjx1	64.8243	71.3074	67.8883	83.7733	72.8343	79.5722	83.7944	-0.234001	0.00237138	0.061619	FALSE	FALSE
Gtpbp1	85.7667	90.1199	88.5174	108.496	103.022	97.9563	99.2065	-0.212782	0.00240505	0.0619433	FALSE	FALSE
Pcdh17	32.027	21.4535	21.5556	17.5354	20.2975	13.7917	18.9863	0.502647	0.002403	0.0619433	FALSE	FALSE
Pign	31.4278	31.955	31.8563	33.6456	44.9648	36.4329	45.5929	-0.339775	0.00239489	0.0619433	FALSE	FALSE
Zmynd8	138.979	145.318	157.387	129.254	129.891	127.712	124.026	0.205152	0.00240184	0.0619433	FALSE	FALSE
Grm4	1.36953	0.901199	1.05082	1.52841	1.65116	2.33264	2.87368	-0.927178	0.00246052	0.0630983	FALSE	FALSE
Rangrf	28.3321	33.7449	33.9856	41.8453	35.725	38.6781	39.4595	-0.281123	0.00247124	0.0630983	FALSE	FALSE
Rsad2	2.5964	2.89135	3.47046	1.96215	1.15081	2.27432	1.01508	0.901412	0.00247148	0.0630983	FALSE	FALSE
Rtn4rl1	0.884487	0.963782	0.718979	1.23925	1.96804	1.21006	2.18743	-0.949148	0.00246232	0.0630983	FALSE	FALSE
Apoe	27.1908	27.1862	28.3306	17.3288	26.1516	19.8129	20.9307	0.388095	0.00248479	0.063125	FALSE	FALSE
E2f4	110.019	130.424	123.291	167.051	146.119	135.162	133.948	-0.263329	0.00248944	0.063125	FALSE	FALSE
Heatr5a	78.6052	87.3037	92.2644	70.6166	72.7342	76.7001	74.0438	0.226885	0.00248789	0.063125	FALSE	FALSE
Ildr2	14.9935	12.2163	13.1767	10.451	10.007	10.1616	9.13574	0.43804	0.00249412	0.063125	FALSE	FALSE
Gsr	50.9436	55.7617	54.4627	59.422	66.68	66.801	61.148	-0.24168	0.00255214	0.064454	FALSE	FALSE
Mamdc2	2.83892	2.94141	2.22607	3.86233	5.18696	3.77596	4.54643	-0.702165	0.00259041	0.0652793	FALSE	FALSE
Mettl23	10.942	15.1952	14.7667	5.84513	6.2377	9.75335	12.038	0.684705	0.00262928	0.0661164	FALSE	FALSE
Tagap	2.09709	0.325433	0.193571	2.85027	4.3864	2.5659	2.54486	-1.82422	0.00266496	0.06687	FALSE	FALSE
Dlc1	92.8283	98.3308	100.906	119.236	112.812	111.806	106.812	-0.210395	0.00267501	0.0669784	FALSE	FALSE
1500012F01Rik	23.2534	26.4727	27.1415	36.2067	29.4373	31.1407	30.2094	-0.308138	0.00269294	0.0672832	FALSE	FALSE
Gpt2	80.7166	68.0906	65.8419	85.9006	99.4362	74.1634	104.039	-0.345225	0.0027004	0.0673257	FALSE	FALSE
Trim27	178.481	195.548	191.497	236.965	210.581	211.293	213.267	-0.209635	0.00274622	0.0683224	FALSE	FALSE
Lhx2	223.119	246.102	253.675	219.657	187.598	175.852	223.032	0.257923	0.00276088	0.0685414	FALSE	FALSE
Dxo	15.3787	26.6855	16.0111	26.5612	25.7347	27.219	28.2079	-0.475662	0.0027686	0.0685874	FALSE	FALSE
Flrt2	39.7734	33.82	33.8197	25.0328	28.0363	33.6192	25.806	0.347461	0.00279584	0.0691157	FALSE	FALSE
2810047C21Rik1	1.78324	4.09295	3.94056	0.826166	1.45102	1.44332	2.55915	1.05274	0.0028348	0.0698103	FALSE	FALSE
Hebp2	8.17437	9.77551	7.89495	4.97765	7.35515	5.52544	5.38995	0.567462	0.00284184	0.0698103	FALSE	FALSE
Tnfrsf1b	3.10997	2.87883	2.79296	1.61102	1.93469	1.98274	1.71563	0.6899	0.00283821	0.0698103	FALSE	FALSE
Cd276	115.668	114.177	112.465	135.78	127.723	125.029	136.693	-0.202499	0.00285586	0.0700075	FALSE	FALSE
Mxd4	25.2935	17.4858	18.5829	12.8469	16.5282	14.7539	15.7409	0.449323	0.00287357	0.070188	FALSE	FALSE
Rims2	2.26828	3.44208	1.03699	0.74355	0.550385	1.64743	0.943598	1.20505	0.00287523	0.070188	FALSE	FALSE
Gm5595	19.1021	18.6999	19.4263	14.6438	16.1947	15.5121	13.2247	0.357188	0.00292048	0.071144	FALSE	FALSE
Mrpl20	48.6182	56.1122	53.7714	65.453	60.3089	59.2345	64.1647	-0.237073	0.00295746	0.0718951	FALSE	FALSE
Rnf169	57.3918	53.5337	49.3607	42.6921	46.9995	43.0955	45.7788	0.258977	0.00300974	0.0730143	FALSE	FALSE
Padi4	0.171191	0.0750999	0.152092	0	0.0333567	1.7349	2.57345	-3.02134	0.00315858	0.0764663	FALSE	FALSE
Srsf5	240.466	264.552	235.369	299.754	264.602	291.041	287.569	-0.211298	0.00316702	0.0765123	FALSE	FALSE
Bhlha9	9.55817	11.5529	11.3378	14.4786	14.26	12.2755	19.3152	-0.479785	0.00317916	0.0766473	FALSE	FALSE
Pxdn	406.45	393.06	421.889	329.578	372.928	363.177	344.413	0.207699	0.0032216	0.0775107	FALSE	FALSE
Kcnh5	1.2982	2.12783	2.62704	0.929437	0.450315	1.63285	0.37172	1.25171	0.00325487	0.0781504	FALSE	FALSE
Ppox	18.9166	20.9153	19.9655	16.2961	13.6429	17.626	14.6687	0.357636	0.00329157	0.0788696	FALSE	FALSE
Nkx1-1	1.61205	2.61598	1.54857	3.30467	3.0021	3.07617	3.63142	-0.753876	0.00336444	0.0803159	FALSE	FALSE
Tln2	198.895	232.459	249.458	191.691	191.818	198.595	198.627	0.217448	0.00336567	0.0803159	FALSE	FALSE
Gpr4	3.45235	2.82876	2.87592	5.20485	4.11955	4.69444	4.88955	-0.630694	0.00342032	0.0814537	FALSE	FALSE
Cdc20	218.497	225.738	221.736	255.327	256.946	244.606	255	-0.188413	0.00343397	0.0816127	FALSE	FALSE
Cd83	3.49515	3.3044	2.57173	4.27541	5.30371	5.84618	4.43205	-0.669074	0.0034894	0.0825942	FALSE	FALSE
Tfap2a	27.0339	29.677	27.0585	21.9141	23.5165	20.3669	24.8052	0.301825	0.00348438	0.0825942	FALSE	FALSE
Upf1	186.413	201.643	200.015	224.345	218.703	227.01	222.303	-0.186559	0.00352528	0.0832749	FALSE	FALSE
Aif1l	123.557	123.502	123.609	153.915	136.946	131.503	151.733	-0.215943	0.00354655	0.0836085	FALSE	FALSE
2900076A07Rik	3.78047	2.94141	3.58107	5.47335	5.27035	4.84023	5.36135	-0.60863	0.00357887	0.0838631	FALSE	FALSE
Fgf4	2.39667	0.926232	0.387143	1.4871	5.3871	2.15769	6.60519	-1.6614	0.00356804	0.0838631	FALSE	FALSE
Tmem66	60.8869	52.958	52.1675	65.5563	68.1477	63.0396	66.3807	-0.249506	0.00357863	0.0838631	FALSE	FALSE
Pcdh18	217.698	185.584	193.53	174.775	170.536	171.741	166.631	0.218981	0.00362637	0.0846383	FALSE	FALSE
Polr2a	382.312	382.446	424.668	315.678	346.626	369.927	334.791	0.214157	0.00362643	0.0846383	FALSE	FALSE
Ppp1r26	23.282	22.5049	23.3807	18.7953	19.2635	18.8652	18.0141	0.299515	0.00363916	0.0847662	FALSE	FALSE
H2-K1	4.25124	3.62983	2.57173	9.14979	10.1571	3.92175	4.43205	-0.986791	0.0036711	0.0853402	FALSE	FALSE
Rassf1	25.536	27.7494	27.2106	37.1775	32.0558	30.1056	31.682	-0.286526	0.00370482	0.0859532	FALSE	FALSE
Alms1	65.4948	67.2019	73.889	53.2258	62.6772	60.6341	56.3871	0.241527	0.00373516	0.0864855	FALSE	FALSE
Zbtb16	40.1871	53.5462	56.7717	46.6371	33.6235	40.3109	36.8289	0.351156	0.00374292	0.086494	FALSE	FALSE
Bloc1s6	53.7254	57.0759	59.8827	49.3015	48.1003	48.5626	49.6819	0.218175	0.00375338	0.0865647	FALSE	FALSE
Ptpn1	95.7671	105.115	101.501	123.698	111.978	117.769	111.302	-0.20469	0.00378458	0.0870562	FALSE	FALSE
Vps13b	50.0306	46.8123	50.1073	34.699	43.7806	43.8682	38.9163	0.280105	0.00378958	0.0870562	FALSE	FALSE
Pitpnc1	92.8141	77.428	85.0055	66.8162	76.3034	66.9759	74.6872	0.25675	0.00381784	0.0875334	FALSE	FALSE
Ankrd13a	119.819	124.528	124.536	110.417	106.558	105.654	109	0.188543	0.00383279	0.0877041	FALSE	FALSE
Scamp4	37.2483	42.4189	40.9403	51.0364	44.8147	47.4692	46.8511	-0.241279	0.00388618	0.088752	FALSE	FALSE
Narg2	39.5737	37.5124	38.4516	32.3857	32.8897	33.8233	31.1101	0.242468	0.0039012	0.0888915	FALSE	FALSE
Paqr8	9.24432	8.08576	7.90877	5.43204	6.28773	6.09402	6.14768	0.48848	0.00391291	0.0888915	FALSE	FALSE
Sertad4	116.125	95.7899	93.2046	129.811	142.566	98.2479	163.314	-0.39232	0.00392028	0.0888915	FALSE	FALSE
Wnk1	354.808	345.272	376.704	286.576	325.861	329.34	298.134	0.211425	0.00392269	0.0888915	FALSE	FALSE
Zswim5	13.9235	15.9462	16.6195	11.6283	11.6748	12.6546	12.181	0.364288	0.00393106	0.0889088	FALSE	FALSE
Sulf1	41.1001	37.6125	40.1108	28.668	30.7215	39.0863	25.3199	0.355425	0.00395383	0.0892512	FALSE	FALSE
Twist2	37.4052	41.9558	46.4157	49.9624	50.0183	46.3175	55.515	-0.267136	0.00398342	0.089746	FALSE	FALSE
Mrpl54	36.4209	39.1896	40.6915	46.2034	43.0801	46.0113	46.994	-0.233269	0.00400512	0.0900612	FALSE	FALSE
Usp29	23.5388	20.3896	22.7861	17.3495	18.5797	18.355	16.8418	0.322281	0.00402399	0.090312	FALSE	FALSE
Lrrc16b	11.5554	9.87564	12.1397	8.65409	8.03896	8.33919	7.90621	0.442588	0.00403521	0.0903903	FALSE	FALSE
Igf2os	51.9993	56.1372	57.2142	65.9074	59.575	65.6492	65.6801	-0.220047	0.00404472	0.0904301	FALSE	FALSE
Snhg8	16.5057	19.7137	17.9054	26.9537	22.8994	21.4603	20.7449	-0.349472	0.00411758	0.0918833	FALSE	FALSE
Sall2	107.351	106.329	109.091	88.4205	100.07	95.4487	88.398	0.208808	0.00414197	0.0922515	FALSE	FALSE
Ift46	54.7954	56.3875	58.2926	44.5304	47.6667	47.3672	52.6556	0.232707	0.0041579	0.0924302	FALSE	FALSE
Srpk2	75.0102	66.3007	61.5004	53.5769	58.7744	52.8489	60.0042	0.26366	0.0041827	0.0928051	FALSE	FALSE
Lrp3	61.9854	67.8403	75.3546	115.477	84.0421	69.1919	86.0819	-0.374517	0.00419712	0.0929488	FALSE	FALSE
3110009E18Rik	2.52507	3.6799	3.13862	5.24616	4.48647	4.89854	4.58932	-0.623108	0.00420694	0.09299	FALSE	FALSE
Rxfp1	1.86884	0.11265	0.248878	2.49915	3.3857	2.47843	2.73072	-1.90043	0.0042429	0.093608	FALSE	FALSE
2610035D17Rik	2.16842	2.00266	5.50296	1.13598	1.43434	2.07022	1.83001	0.989502	0.00427377	0.0939544	FALSE	FALSE
Chaf1b	75.8234	83.1231	81.936	100.131	89.4793	87.8093	94.2311	-0.210142	0.00427467	0.0939544	FALSE	FALSE
Aplnr	68.6048	80.069	71.1513	67.5184	47.1497	66.9468	45.4643	0.368646	0.00429891	0.0940295	FALSE	FALSE
Col11a1	53.7254	48.0264	51.4347	31.5389	47.5333	38.8384	43.477	0.338973	0.00431308	0.0940295	FALSE	FALSE
Eif2b3	32.8687	36.7614	36.3776	46.3686	38.11	43.3579	41.1466	-0.256987	0.00432634	0.0940295	FALSE	FALSE
Fut10	39.1171	34.7087	35.2023	30.3823	31.5387	28.7498	30.4239	0.263594	0.00428656	0.0940295	FALSE	FALSE
Tmem132e	1.51219	1.9526	2.08781	2.4785	3.86937	3.71764	2.47337	-0.760315	0.00432612	0.0940295	FALSE	FALSE
Tmtc2	35.137	26.0722	28.455	19.2084	26.6019	21.9705	24.0046	0.380315	0.00430755	0.0940295	FALSE	FALSE
Ptn	375.108	309.074	300.506	396.952	457.353	335.623	442.147	-0.313946	0.00435608	0.0945002	FALSE	FALSE
Ier2	125.611	122.025	113.184	150.651	147.37	119.927	160.912	-0.266804	0.00438934	0.0950455	FALSE	FALSE
Atad2	199.652	208.515	223.921	170.5	185.18	196.015	180.227	0.203297	0.00440365	0.095179	FALSE	FALSE
Mettl1	23.3818	28.4629	28.3167	34.9468	30.6047	33.5317	31.0387	-0.283055	0.00445542	0.0960951	FALSE	FALSE
Ncor1	280.297	286.757	301.169	247.024	262.2	261.518	244.635	0.189127	0.00446247	0.0960951	FALSE	FALSE
Mga	150.035	158.511	179.703	127.539	137.896	156.914	126.671	0.245624	0.00448214	0.0963412	FALSE	FALSE
Nipbl	218.796	208.089	238.784	172.028	202.475	204.091	176.996	0.23208	0.00451882	0.0967739	FALSE	FALSE
Rpl27	517.938	589.484	575.875	673.388	624.57	630.789	638.759	-0.193981	0.00451617	0.0967739	FALSE	FALSE
Lrrc75a	33.4964	28.0623	27.8328	23.112	26.8021	20.7897	24.1904	0.328794	0.00453037	0.0968439	FALSE	FALSE
Dhps	21.1278	26.5478	29.0357	34.699	29.9043	30.1056	32.6399	-0.315521	0.00456702	0.0969986	FALSE	FALSE
Dlst	167.011	190.266	182.247	211.643	197.155	205.753	207.263	-0.191963	0.00457079	0.0969986	FALSE	FALSE
Pex5l	1.66911	1.6522	2.15694	1.15663	0.867273	1.37043	0.772035	0.810263	0.00456825	0.0969986	FALSE	FALSE
Ppp1r10	98.8771	106.855	102.233	92.2828	87.0109	90.2877	90.3709	0.190172	0.00454958	0.0969986	FALSE	FALSE
Nfatc4	211.093	152.603	160.471	119.98	156.893	103.19	150.747	0.396779	0.00458708	0.0971679	FALSE	FALSE
Crabp2	416.194	394.763	378.861	342.177	345.675	276.797	364.743	0.255042	0.00460733	0.0974204	FALSE	FALSE
Ppp2r2c	4.13712	6.83409	7.83964	11.9794	7.28843	11.3862	8.93559	-0.657253	0.00463759	0.0978833	FALSE	FALSE
Ttn	0.171191	0.200266	0.35949	0.144579	0.967343	2.42011	0.243048	-1.95178	0.00465157	0.0980014	FALSE	FALSE
Clk1	49.0605	33.6698	40.2075	56.5511	51.4026	50.0497	48.3094	-0.331817	0.00468109	0.0984461	FALSE	FALSE
Snhg6	14.0947	15.4831	16.0526	12.6197	10.7408	12.2901	11.6949	0.362333	0.0047234	0.0991574	FALSE	FALSE
Dsg2	13.6525	16.4844	17.4491	18.5887	18.6464	20.8771	23.304	-0.360444	0.00475575	0.099569	FALSE	FALSE
Herpud1	19.0735	21.1657	19.9932	27.0569	23.6332	22.9473	24.991	-0.295344	0.00476003	0.099569	FALSE	FALSE
Ikzf5	64.8101	67.2019	68.8285	79.4565	75.5529	76.3794	76.5029	-0.20112	0.00479103	0.100038	FALSE	FALSE
Dad1	45.28	48.4144	49.098	55.7043	53.2539	55.1086	56.6302	-0.213039	0.00483936	0.100868	FALSE	FALSE
Ncoa2	117.266	112.712	120.484	97.2811	105.907	105.537	98.2629	0.199116	0.00501717	0.104388	FALSE	FALSE
Adarb2	45.8507	48.5271	82.1987	69.2534	83.3917	92.0081	76.5315	-0.448275	0.00507964	0.105312	FALSE	FALSE
Ptp4a3	42.8691	41.8682	41.2722	48.6612	47.9836	51.8283	47.7518	-0.224081	0.00507443	0.105312	FALSE	FALSE
Timm44	79.1758	79.1803	84.1897	96.5582	90.48	89.7192	93.2732	-0.194158	0.00514267	0.10643	FALSE	FALSE
Prrx2	202.105	154.956	159.752	136.71	144.101	102.272	155.794	0.354717	0.0051822	0.107059	FALSE	FALSE
Pura	6.97603	10.5891	10.3008	13.1154	11.3246	15.7016	12.1381	-0.492291	0.00521391	0.107524	FALSE	FALSE
AA987161	16.6055	15.0325	13.0522	10.8641	11.8416	11.7507	11.123	0.386112	0.00524877	0.108053	FALSE	FALSE
Mdga1	5.53518	4.81891	5.36469	6.19625	9.17308	6.16692	11.0658	-0.638911	0.00526782	0.108254	FALSE	FALSE
Exoc6b	43.0688	36.3358	38.7696	29.8453	33.4734	34.4356	33.1975	0.265969	0.00528755	0.108469	FALSE	FALSE
Tpm4	676.219	685.95	684.897	815.467	730.745	763.079	798.87	-0.187443	0.00532082	0.10896	FALSE	FALSE
Spred3	12.6824	13.0298	11.3792	8.13774	10.7742	8.98066	8.73543	0.432678	0.00535764	0.109523	FALSE	FALSE
Rspo4	32.5691	21.6413	35.1885	23.6284	18.6964	18.2092	26.3921	0.455308	0.0053869	0.109737	FALSE	FALSE
Snapc5	13.624	9.73796	9.77536	6.58868	7.55529	9.27224	7.42011	0.516921	0.00538446	0.109737	FALSE	FALSE
Itga11	3.40955	1.52703	1.47944	0.640279	0.950665	1.108	1.55837	0.99605	0.00542237	0.110267	FALSE	FALSE
Adamts4	10.5425	12.1787	11.6005	8.36493	4.53651	10.4094	6.0762	0.639047	0.00547912	0.111228	FALSE	FALSE
Bmf	76.4368	38.5388	44.0098	26.2927	47.5499	32.759	34.1411	0.590501	0.00553835	0.112076	FALSE	FALSE
Fgd6	34.7375	33.1942	34.193	28.2755	30.7382	25.9069	28.6511	0.26192	0.00554006	0.112076	FALSE	FALSE
Coq5	34.1669	37.2245	37.7741	44.5097	40.5617	42.7748	42.419	-0.225805	0.00557227	0.112146	FALSE	FALSE
Pim3	36.6206	41.4927	42.2124	54.6096	42.4297	50.0934	45.9504	-0.266549	0.00557072	0.112146	FALSE	FALSE
Sall3	37.5194	29.6269	26.6299	47.1948	41.3623	30.4993	49.0385	-0.426749	0.00556567	0.112146	FALSE	FALSE
Sgol2	71.4009	69.868	74.5388	58.6165	65.1789	63.5353	61.2338	0.210829	0.00560437	0.112598	FALSE	FALSE
Mrto4	74.2969	99.182	92.2506	118.885	96.2507	105.173	104.396	-0.26104	0.00563677	0.112918	FALSE	FALSE
Polr1e	29.4449	36.9366	35.3959	44.3032	37.0426	41.7251	40.3174	-0.267141	0.00563962	0.112918	FALSE	FALSE
Hspe1	303.365	397.642	390.323	481.242	419.594	419.758	409.979	-0.250007	0.00568981	0.113349	FALSE	FALSE
Marf1	143.23	130.599	140.878	111.532	125.555	124.301	119.208	0.202008	0.00569025	0.113349	FALSE	FALSE
Pde5a	35.3081	29.3516	32.202	24.1447	28.1363	26.5484	27.0927	0.285125	0.00568779	0.113349	FALSE	FALSE
Scube1	363.795	293.465	280.029	421.221	423.73	305.62	421.331	-0.330879	0.00573905	0.114127	FALSE	FALSE
Gm10069	2.31108	0.763516	2.75148	0.4957	0.767203	0.554002	1.52977	1.20429	0.00582167	0.114988	FALSE	FALSE
Mex3d	113.172	102.123	103.257	118.41	128.373	117.755	125.613	-0.206808	0.00581462	0.114988	FALSE	FALSE
Nhp2	85.7096	116.755	114.041	141.233	111.595	127.522	130.817	-0.27627	0.00581679	0.114988	FALSE	FALSE
Wdr83	24.9083	26.648	24.0029	31.0225	29.8375	28.4728	31.439	-0.261129	0.00579403	0.114988	FALSE	FALSE
Ldha	916.728	1060.02	1127.19	1217.96	1257.66	1276.22	1081.13	-0.223753	0.00586171	0.115462	FALSE	FALSE
Ulk2	66.2081	52.1319	55.1678	43.4563	50.9857	48.6793	47.9662	0.275235	0.00586544	0.115462	FALSE	FALSE
Ap1m1	71.5293	74.5992	72.8105	87.553	78.655	83.3773	85.4242	-0.19843	0.00589696	0.115494	FALSE	FALSE
Exosc6	64.6103	80.3945	77.553	99.7596	82.2909	86.7013	83.8229	-0.248128	0.00589061	0.115494	FALSE	FALSE
Frzb	136.297	96.8413	110.999	98.1486	86.7941	95.8715	96.6616	0.281523	0.00589509	0.115494	FALSE	FALSE
Tmem11	47.4199	52.5324	47.5494	64.1312	56.6229	55.6626	55.0432	-0.234155	0.00590656	0.115494	FALSE	FALSE
E2f1	48.4471	46.8373	47.4388	59.1122	56.9065	50.7058	56.0726	-0.227035	0.00597443	0.116142	FALSE	FALSE
Irx5	43.3541	39.4525	43.2632	35.2153	33.5568	35.7623	38.1156	0.236233	0.00597901	0.116142	FALSE	FALSE
Mif	430.331	555.301	558.108	645.422	582.207	608.775	584.13	-0.233795	0.00597943	0.116142	FALSE	FALSE
Shisa2	23.7242	16.7598	15.4581	19.1051	30.8382	24.4198	30.8671	-0.497416	0.0059718	0.116142	FALSE	FALSE
Map2k7	68.5049	70.0432	66.9066	84.0005	76.9538	77.1666	77.1606	-0.202367	0.00599994	0.116154	FALSE	FALSE
Mecom	316.504	244.25	248.781	193.695	239.518	159.115	243.992	0.368028	0.00599293	0.116154	FALSE	FALSE
Galnt5	16.9051	13.2176	12.7204	10.6989	11.1244	8.1934	11.6234	0.456206	0.00602855	0.116516	FALSE	FALSE
Mcl1	224.46	222.171	220.243	256.256	250.092	247.595	250.868	-0.176356	0.00605218	0.116779	FALSE	FALSE
E030030I06Rik	2.06856	2.59095	1.79745	0.867475	1.95137	0.903898	0.972192	0.874228	0.0060812	0.117146	FALSE	FALSE
Crebzf	94.8826	101.272	104.28	129.357	113.513	110.83	109.815	-0.210045	0.0061287	0.117158	FALSE	FALSE
Farp2	11.6553	16.5095	17.933	11.4217	9.70679	13.2232	10.7942	0.445066	0.00610228	0.117158	FALSE	FALSE
Pclo	3.08144	2.7036	2.9174	1.19794	1.90133	2.2889	1.70134	0.703671	0.00611475	0.117158	FALSE	FALSE
Snx10	14.0662	15.5457	17.4353	10.8641	11.7415	12.6546	13.3533	0.366368	0.00614195	0.117158	FALSE	FALSE
Tmem260	31.114	23.1934	31.248	25.859	22.5324	20.6584	20.3588	0.352254	0.00609563	0.117158	FALSE	FALSE
Trmt10c	30.6575	38.5888	36.0734	44.9021	39.978	43.4746	39.6454	-0.257891	0.00614192	0.117158	FALSE	FALSE
Elovl6	195.143	225.625	220.353	170.769	200.991	181.946	186.118	0.208392	0.00615904	0.117293	FALSE	FALSE
Ppan	55.2662	79.0427	72.0224	102.465	74.3854	88.2758	79.3194	-0.32377	0.00623727	0.118589	FALSE	FALSE
Denr	134.171	143.841	140.726	173.825	151.706	159.246	153.592	-0.193007	0.00625696	0.11877	FALSE	FALSE
Chrm4	1.19834	0.688416	1.355	2.51981	2.36832	1.67658	1.4154	-0.881551	0.00630591	0.118927	FALSE	FALSE
Emilin2	87.0649	81.5961	84.6737	77.8249	68.5646	75.7087	70.2266	0.208712	0.00629801	0.118927	FALSE	FALSE
Gltscr1l	20.6428	17.5233	18.9147	14.1894	14.5769	15.8036	15.9697	0.328919	0.00628393	0.118927	FALSE	FALSE
Uevld	17.3046	15.3955	25.4546	24.5578	26.3017	25.003	26.2492	-0.397578	0.00629141	0.118927	FALSE	FALSE
Ube2t	12.4684	15.6959	16.6057	12.2479	10.007	12.2609	11.0229	0.391064	0.00640662	0.120622	FALSE	FALSE
Zfp882	17.9608	15.7209	16.3983	10.9054	14.6436	12.1735	13.5964	0.378471	0.00641638	0.120622	FALSE	FALSE
Nup35	37.1199	42.2312	40.1937	49.8591	43.6138	45.9967	47.4372	-0.229149	0.00643628	0.120802	FALSE	FALSE
Arl13b	32.1411	31.0163	33.0316	27.0569	27.169	27.9917	26.0919	0.24373	0.0064635	0.121066	FALSE	FALSE
Ide	73.2555	121.524	84.1759	70.8644	72.1004	77.7206	73.7579	0.337173	0.00647105	0.121066	FALSE	FALSE
Fam129c	4.3939	4.81891	4.77015	4.19279	2.98542	1.50164	1.68704	0.853322	0.0065234	0.121269	FALSE	FALSE
Gtf2a1	69.5464	70.3436	67.8191	50.169	59.3749	64.9203	59.4753	0.242712	0.00649923	0.121269	FALSE	FALSE
Stk38l	24.6943	27.4365	24.5697	18.093	25.3511	18.6465	16.9133	0.372608	0.00651738	0.121269	FALSE	FALSE
Svep1	20.1577	23.0056	28.9666	19.6215	13.8597	22.3788	12.8529	0.485434	0.00651044	0.121269	FALSE	FALSE
Map2	34.9087	31.3417	28.1785	21.7695	25.668	24.3032	29.1229	0.318818	0.00657887	0.121912	FALSE	FALSE
Slc39a14	22.7969	32.1928	26.0215	22.6576	21.0814	20.7168	22.3604	0.315973	0.00657549	0.121912	FALSE	FALSE
Atp5g3	276.131	295.981	293.039	326.501	317.772	325.884	329.745	-0.17232	0.00661163	0.122132	FALSE	FALSE
Zfp219	128.907	123.477	124.812	109.591	117.315	100.974	110.058	0.199704	0.00660281	0.122132	FALSE	FALSE
Rbm20	0.955817	1.15153	1.11995	1.4871	1.73455	2.82833	1.52977	-0.818679	0.00663918	0.122448	FALSE	FALSE
Pik3r4	50.0306	51.4685	54.1723	43.6835	46.0489	45.7343	43.9488	0.210086	0.0066828	0.123058	FALSE	FALSE
Krt19	15.0791	11.991	15.1954	9.79007	11.6915	11.3279	9.83629	0.40114	0.00671831	0.123293	FALSE	FALSE
Pdcd4	65.6232	55.2735	57.6013	44.9021	57.0566	47.9941	46.4508	0.276852	0.00674828	0.123293	FALSE	FALSE
Prkdc	31.3565	29.1263	35.9628	21.0466	26.6019	30.3243	23.8044	0.336241	0.00672957	0.123293	FALSE	FALSE
Snhg1	40.6008	48.1516	50.3286	61.1157	50.7021	55.4585	53.2561	-0.249392	0.00671838	0.123293	FALSE	FALSE
Wrn	32.1268	27.1611	29.0081	22.0586	26.1183	25.2362	22.9752	0.287758	0.00674786	0.123293	FALSE	FALSE
Btbd11	24.7371	26.4978	24.2379	18.7127	22.1989	20.8917	20.8592	0.283123	0.00677678	0.123387	FALSE	FALSE
Cycs	188.096	235.2	223.547	265.509	236.899	249.971	245.664	-0.210484	0.00680617	0.123387	FALSE	FALSE
Hpse2	8.37409	7.30973	7.39719	6.52671	4.8534	5.49628	4.97533	0.495833	0.00680271	0.123387	FALSE	FALSE
Pctp	17.1191	23.2685	21.5556	26.3754	27.2858	27.3502	22.6464	-0.326973	0.00678937	0.123387	FALSE	FALSE
Rbp4	1.91163	1.22663	1.10612	2.85027	2.0014	2.31806	2.43048	-0.761553	0.00679517	0.123387	FALSE	FALSE
Ap3b1	70.9159	65.3244	65.04	56.2413	58.9913	59.5698	57.202	0.209822	0.00682478	0.123533	FALSE	FALSE
Saal1	47.5483	48.9777	52.3334	57.3979	58.0239	55.094	58.8605	-0.208689	0.00685528	0.123893	FALSE	FALSE
Dnajc11	128.422	149.249	143.81	172.504	148.787	163.416	160.683	-0.199447	0.00687032	0.123973	FALSE	FALSE
Llph	72.4281	81.8464	81.3553	99.4704	85.1596	90.7397	87.869	-0.208873	0.00690156	0.124254	FALSE	FALSE
Pabpc4l	28.9883	23.1683	22.1778	16.3168	22.9327	15.3225	20.03	0.409362	0.00690714	0.124254	FALSE	FALSE
Zdbf2	61.2293	60.493	76.6266	36.5372	48.7174	67.6028	45.307	0.415751	0.0069274	0.124427	FALSE	FALSE
Capn2	88.5771	84.0493	86.2775	76.5443	73.9684	77.9247	73.6864	0.192299	0.00703456	0.126061	FALSE	FALSE
Cpsf4	62.713	68.2658	64.4869	83.3808	71.0497	73.5073	74.4013	-0.21363	0.00704786	0.126061	FALSE	FALSE
Ror1	27.5903	28.8384	30.5705	21.8728	25.1342	26.1401	23.0467	0.269328	0.0070507	0.126061	FALSE	FALSE
Dtymk	93.6272	106.642	104.459	128.035	109.01	115.364	115.605	-0.203599	0.00707774	0.126294	FALSE	FALSE
Zfp473	6.46246	6.79654	5.66888	4.2341	4.3864	4.69444	4.31768	0.516728	0.00708533	0.126294	FALSE	FALSE
Pla2r1	4.57936	5.24448	5.69653	2.66439	3.41906	3.98007	3.7458	0.579817	0.00717679	0.127729	FALSE	FALSE
Btbd3	58.9182	55.7367	55.3891	64.8541	65.6459	63.302	67.553	-0.205181	0.00721223	0.127823	FALSE	FALSE
Kcna1	1.44086	1.56458	1.70066	2.16869	2.45172	2.11395	3.57423	-0.718293	0.00719773	0.127823	FALSE	FALSE
Sned1	8.48822	3.8301	3.66403	2.41654	3.71927	2.12853	3.47416	0.858405	0.00721487	0.127823	FALSE	FALSE
Rwdd3	3.12424	1.76485	1.88041	4.64719	3.18556	4.76733	2.87368	-0.777313	0.00722812	0.127864	FALSE	FALSE
Mars	118.921	151.602	150.211	189.357	156.326	164.393	155.494	-0.246325	0.00727225	0.128451	FALSE	FALSE
Ccdc18	19.9295	16.4093	18.4584	13.0534	14.1099	15.6433	14.8259	0.340747	0.00729799	0.128711	FALSE	FALSE
Polr2e	126.924	146.432	145.096	167.278	150.188	159.421	160.011	-0.190775	0.00732591	0.129009	FALSE	FALSE
Cul9	7.77493	5.34461	5.44765	4.19279	4.95347	3.67391	3.17392	0.631157	0.00734414	0.129135	FALSE	FALSE
Kansl1l	20.4288	15.3454	14.8635	11.9174	14.2433	12.6837	12.3954	0.397336	0.00738328	0.129241	FALSE	FALSE
Peli2	39.7876	38.0757	38.9493	29.5768	35.8251	34.6251	30.4239	0.255168	0.00737703	0.129241	FALSE	FALSE
Prkd1	19.2162	18.3995	21.362	15.1188	16.0446	16.97	15.3692	0.307673	0.00736445	0.129241	FALSE	FALSE
Kif11	247.556	237.416	247.467	197.247	219.587	223.248	217.742	0.186859	0.00740459	0.129411	FALSE	FALSE
Trp63	48.4471	56.0746	54.3106	38.8298	42.2129	43.737	51.6548	0.262658	0.00741517	0.129411	FALSE	FALSE
1700086O06Rik	3.73767	2.11531	1.97719	1.61102	1.41766	1.66201	1.51548	0.748569	0.0074374	0.129606	FALSE	FALSE
Aimp1	82.4142	84.4123	84.5492	96.9506	91.5641	94.953	96.0039	-0.179021	0.00750382	0.130076	FALSE	FALSE
Cyp51	183.574	222.821	195.327	155.918	191.3	155.339	177.039	0.239442	0.00748931	0.130076	FALSE	FALSE
Eif5a	1327.34	1674.65	1618.69	2009.61	1664.38	1801.7	1736.65	-0.227296	0.00752621	0.130076	FALSE	FALSE
Pdlim5	39.3597	36.5111	35.8107	30.0931	29.4873	35.9081	27.1928	0.279216	0.00749006	0.130076	FALSE	FALSE
Pfkfb3	31.9557	34.6211	34.829	42.6095	37.3428	42.6581	37.0291	-0.239104	0.00755998	0.130076	FALSE	FALSE
Rbm46	2.12562	1.5771	1.21673	1.11532	1.13413	0.787266	0.70055	0.817521	0.00751507	0.130076	FALSE	FALSE
Taf1d	45.6081	45.9987	48.7523	59.1535	52.0531	56.0417	50.797	-0.219957	0.00756453	0.130076	FALSE	FALSE
Ulk4	9.85775	12.2163	12.1812	10.5543	2.48507	2.94496	7.26284	0.976169	0.0075371	0.130076	FALSE	FALSE
Zfp318	72.2283	73.9609	81.5627	61.9418	67.8808	70.0375	61.8343	0.214365	0.00754429	0.130076	FALSE	FALSE
Rab32	10.8421	8.53636	3.82995	2.33392	6.53791	2.78459	4.08892	0.973525	0.00760125	0.130516	FALSE	FALSE
2810008D09Rik	4.23698	5.06924	5.11582	10.1825	6.18766	6.40018	6.20487	-0.58819	0.00761535	0.130566	FALSE	FALSE
Slc29a4	17.5899	16.2967	16.5227	19.8693	22.5158	18.3695	23.6471	-0.328993	0.00763333	0.130683	FALSE	FALSE
Clic1	95.1822	80.8826	87.2592	75.3051	80.8232	73.2157	71.5419	0.222668	0.00766159	0.13094	FALSE	FALSE
Scara3	12.8821	13.7057	14.2275	17.1223	15.711	20.6001	16.0269	-0.352301	0.00767071	0.13094	FALSE	FALSE
Col12a1	23.9097	11.3401	12.7204	3.34597	11.7082	6.25439	12.181	0.931914	0.00774933	0.131115	FALSE	FALSE
Glrx5	106.952	126.468	119.987	139.994	126.322	138.792	132.718	-0.190557	0.00775946	0.131115	FALSE	FALSE
Npc1	54.2818	52.1819	47.66	37.6732	48.5506	39.9902	44.4063	0.267899	0.00774157	0.131115	FALSE	FALSE
Top2a	832.088	745.542	815.793	622.578	726.959	718.555	697.233	0.206599	0.00773764	0.131115	FALSE	FALSE
Tpr	317.103	362.232	403.043	283.912	300.827	354.999	269.983	0.254521	0.00773303	0.131115	FALSE	FALSE
Trerf1	25.0367	22.5049	22.9106	17.8865	20.9647	17.4365	19.8299	0.302991	0.00769799	0.131115	FALSE	FALSE
Utp18	71.0728	84.913	81.4936	99.2432	84.1422	95.23	89.1414	-0.215521	0.00771725	0.131115	FALSE	FALSE
Golgb1	114.313	100.934	111.953	75.3051	95.9838	103.511	89.2415	0.260583	0.0077937	0.131503	FALSE	FALSE
Eya2	5.80623	2.99148	2.69617	5.08092	7.42186	5.90449	7.62027	-0.765751	0.00786341	0.131541	FALSE	FALSE
Fez2	30.258	30.5156	28.8145	34.9468	34.8077	34.0711	36.3571	-0.230889	0.0078402	0.131541	FALSE	FALSE
Igfbp3	39.3454	36.436	43.2494	47.2154	54.6549	42.4832	46.8225	-0.268455	0.00785466	0.131541	FALSE	FALSE
Igsf9b	5.1072	7.18456	7.59076	3.65579	4.18626	4.88396	5.07541	0.572229	0.00782912	0.131541	FALSE	FALSE
Pno1	74.7819	91.0461	92.5963	108.6	91.464	104.065	98.7775	-0.225359	0.00785311	0.131541	FALSE	FALSE
Thbs1	38.09	35.9478	34.3451	35.6078	43.9974	50.56	47.2228	-0.296748	0.0078508	0.131541	FALSE	FALSE
Ptprt	3.12424	1.92756	2.15694	0.908783	1.56776	1.04969	1.91579	0.813058	0.0078915	0.131822	FALSE	FALSE
Tbx2	69.6747	51.3308	49.2363	60.2688	78.138	72.1952	75.3163	-0.333424	0.00796521	0.132863	FALSE	FALSE
Tomm5	41.4853	50.6799	49.3331	58.4306	50.6688	60.2696	53.7279	-0.241512	0.007987	0.133037	FALSE	FALSE
Arhgef12	180.278	186.648	196.973	159.698	169.752	174.19	160.054	0.179865	0.00800549	0.133087	FALSE	FALSE
Rttn	30.4007	30.7784	33.7782	24.723	27.1523	28.1083	26.4636	0.249501	0.00801274	0.133087	FALSE	FALSE
Rcc1	154.143	191.367	187.184	237.089	190.016	206.511	201.344	-0.233116	0.00804516	0.133436	FALSE	FALSE
Pdzd7	3.01011	3.14168	3.11097	2.12738	2.15151	1.74948	2.15884	0.594122	0.00813203	0.134495	FALSE	FALSE
Usp49	62.8842	47.7886	52.6652	41.1431	49.7181	43.2121	45.0211	0.281732	0.00812135	0.134495	FALSE	FALSE
Adcy6	132.844	121.762	126.43	108.31	121.268	102.403	108.299	0.206561	0.00818546	0.134997	FALSE	FALSE
Cdc34	157.125	192.118	183.879	212.077	194.636	201.438	206.605	-0.19671	0.00817607	0.134997	FALSE	FALSE
Cep350	80.9306	74.8496	80.899	59.2361	75.753	69.1336	61.92	0.245977	0.00821213	0.135072	FALSE	FALSE
Guf1	34.0813	39.3148	39.0046	47.6078	39.3108	47.1485	43.4484	-0.243814	0.00821891	0.135072	FALSE	FALSE
Mrpl2	59.7314	66.8264	65.5377	78.8163	70.099	70.6936	75.5736	-0.204308	0.00822469	0.135072	FALSE	FALSE
Mybl2	80.9306	92.1851	90.1628	105.791	100.904	95.9881	98.4201	-0.191922	0.0082504	0.135304	FALSE	FALSE
Fggy	5.6493	4.86898	5.32321	3.36663	3.90273	1.39958	3.61713	0.782918	0.00827871	0.135578	FALSE	FALSE
Dcaf8	150.534	148.172	153.115	139.333	131.559	134.608	128.487	0.174148	0.00832206	0.136098	FALSE	FALSE
Ctgf	10.4997	9.68789	7.34189	6.38213	6.70469	6.69176	6.73386	0.468843	0.00833602	0.136136	FALSE	FALSE
Kmt2a	149.122	147.559	176.689	114.651	142.75	148.808	124.026	0.251116	0.00838669	0.136681	FALSE	FALSE
Sct	1.62631	1.75233	1.81128	2.37523	2.15151	3.55728	2.95947	-0.676921	0.0083928	0.136681	FALSE	FALSE
Fbn2	330.17	334.558	393.309	232.463	301.311	354.386	246.694	0.313816	0.00841808	0.136902	FALSE	FALSE
Tbrg4	73.8261	89.7068	88.8907	110.954	88.5119	99.9536	96.0182	-0.23213	0.00844245	0.136918	FALSE	FALSE
Zfp507	110.504	103.312	102.759	86.6235	92.4647	97.446	92.9873	0.19154	0.00843367	0.136918	FALSE	FALSE
Snhg7	3.50942	3.78003	3.91291	7.60073	4.63658	5.42339	4.98963	-0.597643	0.00847346	0.13723	FALSE	FALSE
Atp5g1	85.4243	103.838	102.275	115.87	106.241	114.27	110.701	-0.20159	0.00853835	0.13809	FALSE	FALSE
Fv1	10.5996	10.1635	11.3516	8.55082	7.90553	3.71764	7.73464	0.619146	0.00858411	0.138254	FALSE	FALSE
Hcn4	1.46939	2.05273	2.18459	3.98625	2.25158	4.6507	2.3304	-0.794527	0.00858727	0.138254	FALSE	FALSE
Lpar2	40.7577	36.7614	37.1519	42.5063	46.6493	41.6814	52.098	-0.25933	0.00856054	0.138254	FALSE	FALSE
Zfml	174.929	171.854	189.064	150.672	162.864	163.635	152.277	0.182642	0.00859577	0.138254	FALSE	FALSE
Sox9	116.039	71.42	65.0262	49.3634	74.6689	44.8887	67.696	0.508506	0.00862492	0.138532	FALSE	FALSE
Kif24	29.7159	26.7982	29.5473	21.6456	25.5345	24.6093	23.6328	0.265143	0.00867096	0.13889	FALSE	FALSE
Timm13	77.6494	94.3505	89.7756	105.46	94.9498	97.4314	104.525	-0.204848	0.00866902	0.13889	FALSE	FALSE
Nsun2	213.261	270.535	259.718	325.241	259.882	313.478	274.158	-0.242307	0.00868706	0.138957	FALSE	FALSE
Tjp1	192.005	216.363	223.464	177.626	181.811	203.144	168.732	0.204059	0.00874444	0.139684	FALSE	FALSE
Smtnl2	8.90193	8.49881	9.45735	14.8297	12.1418	12.3921	9.45028	-0.445244	0.00878807	0.14019	FALSE	FALSE
Acp1	127.637	131.062	143.699	116.159	117.816	121.035	120.237	0.174846	0.00880957	0.140341	FALSE	FALSE
Sptbn1	283.35	281.124	299.98	223.726	249.741	276.491	253.213	0.200124	0.00882157	0.140341	FALSE	FALSE
Arpc1b	60.5874	56.0496	51.3102	67.1673	67.9475	59.1178	69.7548	-0.237336	0.00891301	0.140424	FALSE	FALSE
Coq7	34.0242	37.3872	36.8615	44.0966	40.8619	41.1274	41.3896	-0.213622	0.00889512	0.140424	FALSE	FALSE
Ddx56	81.1303	93.6371	93.0664	114.982	92.398	109.809	99.0492	-0.220686	0.00891671	0.140424	FALSE	FALSE
Dpysl5	17.8895	12.7795	13.8818	7.41484	11.8249	11.9256	11.3804	0.479169	0.00889471	0.140424	FALSE	FALSE
Dus1l	58.5901	68.6038	64.8602	79.9936	68.9816	72.7346	74.7587	-0.210833	0.0088567	0.140424	FALSE	FALSE
Gm15800	74.197	72.2837	83.2772	56.3032	68.9649	71.1747	62.7064	0.240802	0.00893489	0.140424	FALSE	FALSE
March6	185.814	187.174	186.022	160.049	171.27	168.985	161.198	0.1721	0.00890862	0.140424	FALSE	FALSE
Pbx3	71.8289	60.4554	66.3535	55.9108	59.8585	57.3684	53.1989	0.226592	0.00893312	0.140424	FALSE	FALSE
Rbpms2	28.0896	29.7896	31.9531	40.0691	32.9564	33.9691	35.4707	-0.249394	0.00891617	0.140424	FALSE	FALSE
Klhl24	94.3833	77.4906	85.1023	63.5115	78.7384	76.0586	69.5689	0.250759	0.00899849	0.141191	FALSE	FALSE
Pcnt	126.738	125.091	139.454	92.0556	107.192	129.184	110.544	0.248644	0.00903022	0.141191	FALSE	FALSE
Rfx5	24.5231	20.69	22.3022	17.3288	20.4143	16.8971	17.8855	0.311474	0.00903198	0.141191	FALSE	FALSE
Rpl41	1167.67	1352.37	1306.63	1424.02	1454.98	1398.77	1499.33	-0.179212	0.00900945	0.141191	FALSE	FALSE
Cpd	125.255	124.428	143.008	103.601	106.941	131.386	102.795	0.235267	0.00909473	0.141817	FALSE	FALSE
Macf1	409.917	392.022	464.558	330.322	373.695	398.065	357.152	0.210557	0.00909628	0.141817	FALSE	FALSE
Polr1c	94.2835	98.4935	100.242	111.181	104.556	112.112	113.275	-0.175176	0.00912517	0.141889	FALSE	FALSE
Slc35f1	4.92174	3.47963	3.60872	1.9828	2.7686	2.6388	2.95947	0.62504	0.00911838	0.141889	FALSE	FALSE
Dancr	5.94889	6.63383	6.3049	11.3391	7.95557	7.53734	8.50668	-0.486186	0.0091873	0.142288	FALSE	FALSE
Rnf26	102.03	86.6903	88.5589	104.593	106.825	108.716	105.812	-0.204484	0.00917796	0.142288	FALSE	FALSE
Smg1	205.486	214.147	260.81	173.164	195.353	218.437	178.697	0.24468	0.00917322	0.142288	FALSE	FALSE
Arl6ip4	67.6775	75.8634	74.2623	86.3757	78.0046	82.5609	84.9381	-0.192348	0.00927671	0.143293	FALSE	FALSE
Wdr19	20.3289	17.0352	17.2417	12.3925	15.9945	14.8997	13.7251	0.351708	0.00927154	0.143293	FALSE	FALSE
Phb2	305.205	372.07	355.231	408.147	368.158	386.271	417.042	-0.198331	0.0092964	0.143407	FALSE	FALSE
Tmem180	6.91897	8.43622	8.65541	5.84513	5.60392	6.40018	5.71878	0.441737	0.00931998	0.143582	FALSE	FALSE
Casc5	68.8616	69.918	75.8109	51.0364	64.395	66.6406	59.561	0.243139	0.00933511	0.143626	FALSE	FALSE
Kifap3	111.645	92.0725	94.7809	82.2242	90.2131	85.4038	83.4512	0.221562	0.00938865	0.14407	FALSE	FALSE
Mrc2	170.735	157.885	162.171	132.703	155.125	140.483	142.955	0.195807	0.00938272	0.14407	FALSE	FALSE
Etv4	62.1709	76.0637	71.1237	86.1278	76.687	74.9215	89.4845	-0.228956	0.00948882	0.145307	FALSE	FALSE
Phf3	142.959	154.668	161.01	134.045	136.996	142.087	125.313	0.183653	0.00949409	0.145307	FALSE	FALSE
Eml4	298.6	303.166	301.543	271.168	268.921	263.195	272.028	0.163598	0.00950851	0.145337	FALSE	FALSE
Cacna1g	121.546	86.7654	83.8717	62.9332	86.177	53.2571	87.6116	0.425794	0.0095679	0.1457	FALSE	FALSE
Evpl	7.73213	7.53502	6.76117	8.05512	11.1244	9.08272	13.0245	-0.492648	0.00956959	0.1457	FALSE	FALSE
Spta1	15.9636	12.6919	13.1075	14.0448	19.8305	23.5597	17.7282	-0.434179	0.00956144	0.1457	FALSE	FALSE
Hes1	38.2755	38.5012	33.4187	43.9934	42.0628	40.1068	47.8947	-0.244409	0.00960096	0.14588	FALSE	FALSE
Tns1	138.194	136.895	148.69	132.517	124.721	125.365	114.619	0.184729	0.00960641	0.14588	FALSE	FALSE
Acap2	79.2614	87.9545	89.983	74.7681	72.7676	81.759	65.866	0.21655	0.00970413	0.145995	FALSE	FALSE
Cav1	15.8209	11.678	12.0706	7.91054	11.2912	9.38887	10.1508	0.443976	0.00967609	0.145995	FALSE	FALSE
Cd47	13.4242	12.7545	12.5407	9.23241	10.6241	10.1616	10.2223	0.35848	0.00970575	0.145995	FALSE	FALSE
Cd59a	8.13157	9.26232	5.97306	4.02756	5.87077	5.80244	5.64729	0.543345	0.00971145	0.145995	FALSE	FALSE
D830031N03Rik	103.114	92.4605	104.916	82.2862	88.095	91.2354	88.3265	0.194813	0.00966066	0.145995	FALSE	FALSE
Fras1	55.7655	57.0259	64.8049	40.2756	48.7674	55.7647	51.7835	0.267491	0.00963068	0.145995	FALSE	FALSE
Igf1r	215.458	183.619	202.697	159.801	188.115	170.531	174.98	0.210339	0.00965935	0.145995	FALSE	FALSE
Numbl	20.4288	17.3481	15.9558	12.7849	14.9271	12.6691	15.455	0.358802	0.00973221	0.145995	FALSE	FALSE
Rcsd1	10.7422	12.5417	12.0153	14.4373	16.3114	17.5677	12.7386	-0.375271	0.00975134	0.145995	FALSE	FALSE
Tanc1	168.98	142.64	144.57	111.739	141.449	109.226	141.168	0.272256	0.00975117	0.145995	FALSE	FALSE
Trmt61b	5.80623	7.53502	7.09301	4.60588	3.98612	5.90449	4.189	0.543579	0.00973901	0.145995	FALSE	FALSE
Dclk2	10.2287	8.69907	10.2316	6.23756	8.08899	6.9396	7.52019	0.432015	0.00978511	0.146314	FALSE	FALSE
Dusp3	12.2116	12.9547	12.278	15.7385	16.6617	15.5121	14.4828	-0.321018	0.00986301	0.146623	FALSE	FALSE
Fat1	281.723	292.439	370.675	225.481	264.352	305.911	248.695	0.270319	0.00989359	0.146623	FALSE	FALSE
Id2	108.635	92.4605	85.5171	68.5925	82.5744	86.1181	82.1502	0.258121	0.00987054	0.146623	FALSE	FALSE
Nop58	221.493	250.633	269.327	309.089	255.379	307.034	275.145	-0.213874	0.00987856	0.146623	FALSE	FALSE
Rgs2	20.871	24.1321	25.1366	20.7161	18.7464	20.0461	16.1984	0.305929	0.00986315	0.146623	FALSE	FALSE
St6galnac2	2.11136	1.61465	1.54857	0.784858	1.08409	1.13716	1.25813	0.712183	0.00986352	0.146623	FALSE	FALSE
Wdr46	65.3379	92.9361	90.384	116.489	96.4341	98.9185	91.7435	-0.283202	0.0098926	0.146623	FALSE	FALSE
Lama2	11.6695	6.24581	7.79816	3.80037	6.02088	5.77328	6.59089	0.624893	0.00991493	0.146754	FALSE	FALSE
Bdh1	14.2659	16.159	14.9465	17.4941	18.563	18.1654	20.3017	-0.301224	0.00993207	0.146821	FALSE	FALSE
Thsd4	17.3616	24.6578	21.0855	21.3564	29.3372	37.9491	24.991	-0.433975	0.00995402	0.14696	FALSE	FALSE
H2-T24	2.33961	2.22796	2.12929	1.96215	1.03406	1.34127	1.17235	0.703943	0.00997945	0.14715	FALSE	FALSE
Mtif2	39.5166	41.2299	42.323	36.0209	34.7243	37.089	34.1125	0.209304	0.0100153	0.147492	FALSE	FALSE
Mpp2	36.9915	32.7436	31.9808	29.8659	31.0384	25.2946	25.5629	0.279894	0.0100901	0.148407	FALSE	FALSE
Calcoco1	37.9045	34.6336	34.3036	27.0983	33.6402	29.2017	28.9227	0.260755	0.0101438	0.149009	FALSE	FALSE
Sema5a	117.48	127.67	140.92	106.328	113.112	122.449	105.897	0.200937	0.0101656	0.149142	FALSE	FALSE
Ndufa11	48.4043	47.5508	46.4848	54.527	54.6382	51.391	58.5746	-0.206474	0.0101832	0.149214	FALSE	FALSE
Kdm7a	59.6458	54.1345	61.4174	44.9641	57.0399	47.6733	47.0655	0.24743	0.0102791	0.149952	FALSE	FALSE
Samd4	18.403	15.3329	17.7118	14.6851	13.3593	13.8209	12.9244	0.324606	0.0102849	0.149952	FALSE	FALSE
Snx7	8.30276	8.39867	8.14383	11.2359	9.94029	10.3511	11.7235	-0.38451	0.0102516	0.149952	FALSE	FALSE
Zkscan8	59.3605	52.0943	60.9059	45.3978	50.7522	52.9218	46.8797	0.229401	0.0102781	0.149952	FALSE	FALSE
Mdk	1087.8	1035.16	1089.49	1210.73	1208.26	1181.93	1202.29	-0.165284	0.0103499	0.150647	FALSE	FALSE
Ndufaf4	35.7361	40.3537	41.5072	52.255	41.2455	49.0875	43.6914	-0.247923	0.0103584	0.150647	FALSE	FALSE
Actc1	0.898753	1.22663	1.85275	2.54046	3.8527	9.24308	0.486096	-1.60311	0.0107116	0.150694	FALSE	FALSE
Cdh6	13.5241	21.9292	23.3392	14.7471	12.859	16.8971	13.9538	0.423365	0.010735	0.150694	FALSE	FALSE
Chuk	47.5198	47.8386	48.863	54.9607	53.0871	55.925	55.5865	-0.191378	0.0105626	0.150694	FALSE	FALSE
Cramp1l	67.6775	69.3047	75.3408	59.8558	64.862	62.2232	60.476	0.194233	0.0106689	0.150694	FALSE	FALSE
Fnbp4	75.695	68.5287	73.4465	84.1657	82.0908	81.2342	83.5656	-0.189947	0.0104672	0.150694	FALSE	FALSE
Gatad2a	196.456	229.405	227.916	264.559	238.367	244.504	243.548	-0.184841	0.0104344	0.150694	FALSE	FALSE
H19	4496.96	4521.27	4587.35	5217.22	5121.23	4920.27	5052.21	-0.163016	0.0104359	0.150694	FALSE	FALSE
Hspa1l	4.65069	3.31691	4.13413	2.12738	2.08479	3.23654	2.95947	0.627324	0.0105586	0.150694	FALSE	FALSE
Ift140	58.5616	54.0594	56.3984	43.6422	51.7195	49.9622	48.2522	0.218677	0.0106018	0.150694	FALSE	FALSE
Iqgap1	103.428	93.7497	95.9285	72.3928	85.1262	95.5945	78.4616	0.236644	0.010661	0.150694	FALSE	FALSE
Lama5	108.963	119.872	132.873	89.8662	91.3306	117.813	107.441	0.246369	0.0105064	0.150694	FALSE	FALSE
Marveld1	49.9592	41.33	43.0696	39.2222	36.2253	34.2169	40.732	0.252331	0.0105309	0.150694	FALSE	FALSE
Med22	102.7	107.118	104.294	119.918	112.629	119.242	119.294	-0.1696	0.0104869	0.150694	FALSE	FALSE
Mettl13	35.5364	41.1798	41.1754	49.9418	41.0287	48.5772	45.55	-0.235317	0.0104393	0.150694	FALSE	FALSE
Mios	42.4268	41.7055	40.6638	48.0003	43.6972	51.0119	50.4825	-0.215747	0.0106981	0.150694	FALSE	FALSE
Mrpl9	66.1796	71.9582	64.1551	87.7802	83.2249	71.1163	74.0724	-0.228659	0.010625	0.150694	FALSE	FALSE
Ndrg1	4.95027	4.44341	5.76566	8.11708	8.52263	5.8316	6.56229	-0.52108	0.0106509	0.150694	FALSE	FALSE
Nedd4	2662.12	2480.48	2546.25	2229.74	2371.29	2267.78	2231.05	0.171956	0.0107417	0.150694	FALSE	FALSE
Nes	120.504	134.416	143.188	112.483	109.377	131.488	98.7775	0.231475	0.0104935	0.150694	FALSE	FALSE
Ppwd1	40.3583	48.5771	48.6556	40.8539	38.5937	38.8822	39.1879	0.220394	0.0107359	0.150694	FALSE	FALSE
Rabl2	24.7228	25.146	22.7308	25.4253	26.0516	33.4442	36.9433	-0.333301	0.010518	0.150694	FALSE	FALSE
Rerg	3.03864	2.29055	2.51643	7.24961	3.13553	7.50818	2.28751	-0.946536	0.010748	0.150694	FALSE	FALSE
Slc5a3	30.2865	28.3127	32.4232	25.1774	24.4338	28.1812	24.0617	0.252402	0.0107364	0.150694	FALSE	FALSE
Tbc1d9b	82.4855	77.9662	79.3643	70.6785	71.7335	68.4921	70.2409	0.185672	0.0103825	0.150694	FALSE	FALSE
Tbl1xr1	81.972	75.8008	77.4286	66.2585	67.0302	70.3728	70.7841	0.192029	0.010505	0.150694	FALSE	FALSE
Tmem173	16.8053	17.9739	18.8041	26.6439	21.5317	19.7837	20.9593	-0.31405	0.0107227	0.150694	FALSE	FALSE
Tmtc4	43.2257	41.1422	42.2124	35.7937	34.6242	37.1619	38.2586	0.210221	0.0106184	0.150694	FALSE	FALSE
Trmt10a	27.1623	33.3819	31.5798	39.2842	33.1899	36.9286	36.2856	-0.245464	0.0105916	0.150694	FALSE	FALSE
Ubr4	250.31	264.677	318.466	202.989	240.652	271.359	215.012	0.25676	0.0105952	0.150694	FALSE	FALSE
Yrdc	26.4633	33.2442	31.5798	38.1276	32.2392	37.0161	37.7439	-0.253351	0.0107482	0.150694	FALSE	FALSE
Eif6	116.196	132.301	126.789	154.059	135.078	140.337	139.023	-0.183784	0.0109027	0.152633	FALSE	FALSE
Trp53bp1	195.771	209.416	219.524	173.722	191.934	190.693	180.099	0.177541	0.0109126	0.152633	FALSE	FALSE
Cbl	75.3383	80.9202	90.3564	65.4324	70.8996	79.3681	65.7516	0.224112	0.0109471	0.152933	FALSE	FALSE
Fam203a	18.4316	24.9081	24.0858	32.6129	24.3837	28.4145	26.6209	-0.316358	0.011037	0.153821	FALSE	FALSE
Slc12a4	36.7062	40.2035	36.8892	48.0416	43.0468	41.2877	44.4063	-0.219623	0.0110316	0.153821	FALSE	FALSE
Trmt61a	22.1407	27.2362	26.6714	36.2687	26.1016	34.5814	28.8655	-0.310486	0.0110547	0.153885	FALSE	FALSE
Ckap5	319.4	306.408	347.419	255.141	297.892	302.31	276.417	0.197175	0.0110958	0.154273	FALSE	FALSE
Eif1	356.505	368.941	369.002	409.634	399.896	409.451	411.437	-0.159993	0.0111305	0.154572	FALSE	FALSE
Exoc4	55.8368	47.5883	48.78	41.5768	44.4644	44.7867	42.7907	0.224689	0.0111864	0.155163	FALSE	FALSE
AA465934	1.41233	1.25167	1.25821	13.0328	1.48437	1.09342	1.55837	-1.71078	0.0112178	0.155262	FALSE	FALSE
Cwf19l1	24.409	24.808	25.9939	30.5888	29.2204	29.712	28.265	-0.231701	0.0112201	0.155262	FALSE	FALSE
Hoxc6	14.9364	15.1201	17.6288	12.0827	11.0911	14.5936	12.2096	0.346419	0.0112754	0.155843	FALSE	FALSE
Aimp2	48.2188	56.8131	58.1129	69.8524	56.6563	64.4829	63.5785	-0.226407	0.0113399	0.156361	FALSE	FALSE
Arid3a	139.678	153.73	165.752	176.634	162.747	182.689	173.322	-0.183778	0.011353	0.156361	FALSE	FALSE
Mesdc2	118.165	119.734	115.064	135.657	130.174	126.429	137.136	-0.169687	0.0113451	0.156361	FALSE	FALSE
Pfdn4	31.1568	33.7324	34.0547	40.3789	36.4255	36.4038	40.2888	-0.21805	0.0114331	0.15691	FALSE	FALSE
Ppm1g	245.417	283.127	270.322	331.995	282.448	302.85	295.875	-0.187552	0.0114331	0.15691	FALSE	FALSE
Slc38a7	23.6244	26.6229	25.4823	23.2153	21.3649	20.4106	18.5574	0.274775	0.0114267	0.15691	FALSE	FALSE
Pcnxl4	29.3878	21.9792	26.2151	20.2204	20.531	21.1833	22.2746	0.29588	0.0114826	0.157405	FALSE	FALSE
Erbb2	81.3585	69.3548	72.9349	58.286	65.8627	64.7599	67.1527	0.219196	0.0115383	0.157798	FALSE	FALSE
Nip7	70.5735	84.5375	82.89	99.8422	83.792	91.3812	91.0572	-0.205698	0.0115363	0.157798	FALSE	FALSE
Acta2	1.99723	2.44075	1.92189	10.8021	2.41836	7.52276	1.14376	-1.36545	0.0115821	0.157823	FALSE	FALSE
Fam132a	8.94473	8.73662	7.93643	12.4958	14.0432	9.62214	10.1222	-0.436948	0.011586	0.157823	FALSE	FALSE
Inadl	31.7131	28.4253	26.699	21.976	23.8	25.2071	25.3914	0.263639	0.0115877	0.157823	FALSE	FALSE
Slc25a19	13.1104	14.5068	14.1169	10.7402	10.7575	11.4154	11.5376	0.323568	0.0115941	0.157823	FALSE	FALSE
Slc25a4	401.029	441.588	433.296	502.247	460.872	477.287	471.241	-0.168177	0.0117377	0.159592	FALSE	FALSE
D8Ertd738e	78.5909	84.7252	82.4199	91.5599	91.1137	90.5647	96.0325	-0.172522	0.0117522	0.159603	FALSE	FALSE
Ubxn10	2.99584	1.63968	1.94954	0.805512	1.95137	1.1809	0.972192	0.834104	0.011769	0.159646	FALSE	FALSE
Pitpnb	130.433	142.865	136.703	163.973	149.855	152.161	149.861	-0.171624	0.0118217	0.159805	FALSE	FALSE
Tnrc6b	133.9	112.813	126.734	91.3327	116.982	112.346	101.451	0.237966	0.0117958	0.159805	FALSE	FALSE
Zfp113	36.1926	35.7851	37.2072	28.9158	34.1406	30.2368	30.8385	0.229562	0.0118204	0.159805	FALSE	FALSE
Impa2	21.2848	23.9318	22.8276	31.4356	25.2343	25.2217	27.5359	-0.269113	0.011843	0.159832	FALSE	FALSE
Tomm20	227.056	249.545	250.108	290.666	253.461	283.664	268.025	-0.177412	0.0118511	0.159832	FALSE	FALSE
Klf16	29.9727	34.5835	34.0547	43.4977	35.3414	37.1619	39.1593	-0.237989	0.0119975	0.161609	FALSE	FALSE
Micall2	11.2986	9.66286	9.40204	11.8348	14.0432	12.0423	14.7973	-0.38188	0.0120105	0.161609	FALSE	FALSE
Litaf	46.3072	42.8695	44.6044	55.2292	52.37	47.1922	52.1552	-0.213956	0.0120304	0.161692	FALSE	FALSE
Camk2n1	4.97881	4.29321	5.24025	2.99485	3.45242	3.83428	3.11673	0.528031	0.0121745	0.162507	FALSE	FALSE
Hoxc9	25.7072	25.8719	29.5473	22.2239	22.2656	24.3469	22.2174	0.248044	0.0121674	0.162507	FALSE	FALSE
Lmcd1	1.98296	1.90253	1.57622	2.85027	2.86867	3.71764	2.08735	-0.661514	0.0121726	0.162507	FALSE	FALSE
Taf10	85.5242	98.4935	94.1034	109.446	101.771	102.622	105.383	-0.176638	0.012139	0.162507	FALSE	FALSE
Ttbk2	60.7585	57.6517	62.731	48.7438	54.6883	56.1291	48.7812	0.212803	0.0121076	0.162507	FALSE	FALSE
Twist1	381.399	427.394	460.036	421.345	340.572	351.164	346.944	0.212687	0.0121636	0.162507	FALSE	FALSE
Rb1	17.5899	16.0463	17.4906	13.5491	13.4427	14.7394	13.625	0.299725	0.0122317	0.163084	FALSE	FALSE
Ntsr1	0.413712	0.688416	0.428622	1.03271	0.667133	2.2889	0.51469	-1.1383	0.0122678	0.16338	FALSE	FALSE
Klhl42	21.6985	23.0056	23.8922	18.4442	21.7152	17.349	17.1134	0.294106	0.0123166	0.163656	FALSE	FALSE
Zfp799	42.9689	39.853	41.0924	33.7076	34.8577	38.2553	35.485	0.21467	0.0123096	0.163656	FALSE	FALSE
Arel1	59.9026	53.5838	53.7437	49.9831	45.682	48.9854	48.6525	0.205989	0.0123814	0.16399	FALSE	FALSE
Mapkapk5	49.5883	53.4086	51.1582	60.2275	57.0733	56.9018	60.4332	-0.190742	0.0123838	0.16399	FALSE	FALSE
Notch2	145.641	137.057	161.134	106.699	131.776	144.143	118.364	0.239963	0.0123646	0.16399	FALSE	FALSE
Cdkn1a	5.62077	7.52251	5.80714	6.69195	9.03966	8.99524	11.1373	-0.506402	0.0124599	0.164193	FALSE	FALSE
Dcaf7	246.173	269.546	233.544	207.12	218.603	220.216	234.084	0.182873	0.0124821	0.164193	FALSE	FALSE
Mrpl12	113.485	145.193	139.233	165.667	141.799	155.791	150.475	-0.209869	0.0124834	0.164193	FALSE	FALSE
Mrps9	50.8152	53.008	54.7392	66.3618	59.575	59.0741	57.9026	-0.199706	0.0124688	0.164193	FALSE	FALSE
Ptprv	1.66911	0.500666	0.539235	1.65233	2.11815	1.37043	2.13024	-1.01225	0.0124353	0.164193	FALSE	FALSE
Wbscr16	41.8705	48.9902	48.2822	60.3928	51.4193	52.6156	51.7692	-0.219891	0.0124717	0.164193	FALSE	FALSE
Aldh4a1	39.6022	38.5137	27.3489	24.5784	29.4539	29.5225	29.0085	0.320488	0.0125555	0.16489	FALSE	FALSE
Rps18	691.07	769.286	761.316	822.097	813.719	825.929	853.499	-0.162429	0.0125645	0.16489	FALSE	FALSE
Jam2	3.50942	2.06525	1.90806	1.17729	1.7679	1.63285	1.48688	0.713034	0.0126103	0.164919	FALSE	FALSE
Ldb2	42.8834	31.93	33.239	28.668	33.4067	27.3356	27.2071	0.304939	0.0126372	0.164919	FALSE	FALSE
Mia3	115.411	127.707	122.531	102.507	110.811	112.594	106.112	0.174268	0.0126306	0.164919	FALSE	FALSE
Rrp9	54.881	70.1308	69.506	89.9902	67.614	78.3184	74.2869	-0.257766	0.0126	0.164919	FALSE	FALSE
Wars2	21.4987	22.4173	23.1041	20.1791	18.1961	18.7777	17.0562	0.269073	0.0126366	0.164919	FALSE	FALSE
Gcc2	73.07	66.6387	70.1143	56.0141	64.0448	63.025	60.0471	0.201983	0.0127713	0.166483	FALSE	FALSE
Zfp536	1.95443	1.18908	1.0923	0.598971	0.90063	1.13716	0.414611	0.882138	0.0128169	0.166891	FALSE	FALSE
Brinp1	3.42382	2.84128	2.30903	1.30121	2.03476	1.64743	2.23032	0.658712	0.0128608	0.167276	FALSE	FALSE
Acsl6	1.52645	2.9289	3.27689	0.805512	0.550385	1.51622	2.28751	0.990697	0.0129093	0.167721	FALSE	FALSE
Rad51d	19.6299	18.1617	18.0851	16.6266	14.1265	15.1622	14.8831	0.293937	0.0129321	0.16783	FALSE	FALSE
Myo1b	181.591	188.125	192.396	167.712	169.969	166.959	167.346	0.15749	0.012978	0.168239	FALSE	FALSE
Kat6a	220.237	209.917	226.824	184.194	194.052	207.24	191.894	0.172083	0.0130206	0.168604	FALSE	FALSE
Eif2s2	331.041	391.834	400.555	447.163	393.542	431.524	434.312	-0.188075	0.0130725	0.169057	FALSE	FALSE
Epha3	18.8025	15.8461	27.3489	12.4338	9.57336	21.781	10.7656	0.598778	0.0130989	0.169057	FALSE	FALSE
Pik3r2	127.209	138.522	131.449	153.708	150.072	138.836	154.207	-0.172284	0.0130854	0.169057	FALSE	FALSE
Cenpv	19.4872	20.0767	19.1083	23.5251	24.1002	20.2648	28.3651	-0.29928	0.0131609	0.16937	FALSE	FALSE
Gnl3	103.371	138.359	144.639	174.362	132.309	170.808	145.829	-0.274757	0.0131602	0.16937	FALSE	FALSE
Hsd17b11	18.346	14.2565	15.1124	12.062	12.6088	12.917	12.8244	0.334762	0.0131667	0.16937	FALSE	FALSE
Ager	1.59778	1.75233	1.47944	2.56112	2.31829	2.23059	2.64493	-0.597316	0.0131941	0.169537	FALSE	FALSE
Fn1	537.112	463.366	548.899	378.322	475.349	489.709	407.177	0.238827	0.0132275	0.16978	FALSE	FALSE
Tll1	5.05014	5.85779	5.04668	4.17214	3.50245	4.06754	3.18822	0.512585	0.0132756	0.17021	FALSE	FALSE
Eno3	72.9987	63.0464	67.7638	51.3669	65.696	60.2842	49.882	0.257849	0.0133363	0.170219	FALSE	FALSE
Kifc5b	19.2162	19.3883	19.5231	23.0294	24.3003	22.1018	22.918	-0.252628	0.0133491	0.170219	FALSE	FALSE
Ppm1h	10.7993	7.87297	5.75184	3.88298	6.12095	5.0006	6.47651	0.59795	0.0133119	0.170219	FALSE	FALSE
Sssca1	35.0371	43.8458	45.8902	57.8523	43.5471	49.8748	48.8812	-0.266073	0.0133199	0.170219	FALSE	FALSE
Stat1	14.4656	12.8671	13.3564	10.0999	10.1738	11.2258	11.4376	0.336145	0.0133202	0.170219	FALSE	FALSE
Prkd2	31.1853	28.0749	28.8698	24.5371	26.4852	23.0931	25.1197	0.243757	0.0134051	0.170747	FALSE	FALSE
Eya4	20.4716	13.7183	15.7208	9.64549	15.1106	12.4359	12.1095	0.431376	0.0134764	0.171096	FALSE	FALSE
Ndufs8	43.725	41.6179	39.53	44.8815	51.5861	45.5448	53.0845	-0.229127	0.0134667	0.171096	FALSE	FALSE
Tipin	86.0092	83.023	86.2775	92.6132	92.0978	96.892	103.41	-0.177967	0.0134551	0.171096	FALSE	FALSE
Habp4	17.276	15.3579	15.7069	18.2996	19.8305	20.4981	20.0014	-0.287685	0.0135002	0.171213	FALSE	FALSE
Ascc3	47.5198	52.0943	56.8547	42.1964	43.7306	51.0556	39.674	0.239729	0.0135332	0.1714	FALSE	FALSE
Psd2	9.70082	8.24847	11.1304	6.52671	5.6206	8.70366	7.23425	0.463333	0.0135443	0.1714	FALSE	FALSE
Cyp1b1	10.3143	12.3039	12.0844	14.933	14.0265	21.8102	12.2239	-0.445277	0.0135706	0.171547	FALSE	FALSE
Suox	13.8522	13.3177	13.8818	11.0293	11.1912	11.5028	9.822	0.330181	0.0136203	0.17199	FALSE	FALSE
Arhgap9	2.5964	2.52836	2.08781	4.87438	3.70259	2.75543	3.48845	-0.619727	0.0136854	0.172583	FALSE	FALSE
Ganc	6.77631	6.97178	7.61842	5.16354	5.67063	5.45255	4.78947	0.434801	0.0136968	0.172583	FALSE	FALSE
Ranbp1	470.319	517.851	517.403	582.468	546.432	549.06	569.275	-0.162753	0.0137343	0.172869	FALSE	FALSE
Ap5m1	16.577	17.8362	20.7121	23.174	22.7659	22.5537	20.702	-0.278714	0.0137917	0.173122	FALSE	FALSE
Bbs2	18.0892	16.1965	15.8314	10.8847	11.6081	15.1622	14.4256	0.357494	0.0137891	0.173122	FALSE	FALSE
Tbck	17.918	18.2242	17.7256	13.735	15.0772	15.5558	14.5257	0.285618	0.0137988	0.173122	FALSE	FALSE
Exoc5	92.6571	94.3505	96.1497	104.923	104.123	109.882	103.696	-0.162782	0.0138579	0.173677	FALSE	FALSE
Sesn1	33.5677	31.0413	29.8791	26.0449	28.0363	25.1488	27.493	0.239187	0.0138741	0.173694	FALSE	FALSE
Bok	17.1334	20.0892	21.7353	36.909	19.497	28.8081	21.4311	-0.438946	0.0139063	0.173717	FALSE	FALSE
Rpl18	778.206	866.165	843.764	981.919	920.844	909.394	905.268	-0.164153	0.0139124	0.173717	FALSE	FALSE
Rps11	681.626	788.674	761.897	889.058	824.343	812.779	825.505	-0.171329	0.0139206	0.173717	FALSE	FALSE
Cables1	12.4113	16.1465	16.9237	22.4511	16.8451	20.119	17.6996	-0.34545	0.013953	0.173937	FALSE	FALSE
Zfp369	17.005	14.2064	14.4487	10.1205	11.2579	12.9607	13.2104	0.354461	0.0140672	0.175173	FALSE	FALSE
Igfbp2	139.506	110.535	96.5506	81.6252	102.155	76.9479	107.97	0.325648	0.0141229	0.175679	FALSE	FALSE
Entpd1	6.03448	4.19308	4.24474	3.32532	3.13553	3.73222	2.90228	0.55844	0.0141643	0.176007	FALSE	FALSE
AI854703	2.25402	2.11531	2.33668	1.42514	1.28423	1.53079	1.65844	0.596755	0.0141918	0.176162	FALSE	FALSE
Efhd2	33.5392	31.2165	34.1377	39.8625	36.2253	38.0803	38.2872	-0.209313	0.0142396	0.176381	FALSE	FALSE
Lyar	129.149	165.07	163.955	202.122	162.247	181.567	169.118	-0.226861	0.0142279	0.176381	FALSE	FALSE
Zfp933	13.4242	12.3665	11.2686	9.00521	10.8743	8.90777	9.37879	0.372374	0.014307	0.177028	FALSE	FALSE
Epm2aip1	122.259	118.357	122.406	99.9868	113.846	110.523	103.252	0.178586	0.0143412	0.177132	FALSE	FALSE
Trp53inp1	40.7007	22.7052	22.717	13.8383	25.7013	19.7837	20.5447	0.522979	0.0143457	0.177132	FALSE	FALSE
Nf1	87.179	79.3681	95.1403	68.3653	77.8378	83.0565	70.2837	0.21971	0.0143795	0.177362	FALSE	FALSE
4930427A07Rik	28.2465	24.0695	24.4868	19.9932	22.3156	19.5942	22.775	0.273572	0.0144943	0.178277	FALSE	FALSE
Prdm16	141.575	89.857	90.6191	69.4186	92.498	58.3451	97.9626	0.432127	0.0144994	0.178277	FALSE	FALSE
Sgpp2	2.29681	3.24181	2.25372	0.9914	1.95137	2.0848	0.643362	0.871368	0.014498	0.178277	FALSE	FALSE
Stk25	101.959	95.4645	93.5641	86.0865	88.8121	82.2693	85.8245	0.177858	0.0145262	0.178419	FALSE	FALSE
Slc1a4	21.9125	28.4253	27.2936	35.0708	27.0523	34.0274	29.9092	-0.283592	0.0145771	0.178856	FALSE	FALSE
Fcgrt	4.60789	3.02903	2.98653	1.44579	2.71857	2.62422	2.08735	0.6692	0.0146212	0.179021	FALSE	FALSE
Psat1	146.397	212.57	200.125	249.13	200.407	245.729	204.718	-0.27163	0.0146097	0.179021	FALSE	FALSE
Fam204a	30.9	30.478	29.4782	37.6319	32.5895	35.9081	34.813	-0.218002	0.0146485	0.179168	FALSE	FALSE
Tex15	6.20567	5.18189	6.74735	4.11018	4.05284	4.38828	4.70369	0.485047	0.0147216	0.179875	FALSE	FALSE
Soga1	237.542	232.359	246.956	200.511	225.258	216.965	207.406	0.168916	0.014781	0.180352	FALSE	FALSE
Zfp319	43.668	41.2549	42.7655	33.5837	39.7778	37.1035	36.1284	0.215264	0.0147916	0.180352	FALSE	FALSE
Banf1	153.858	177.561	169.555	205.53	178.725	182.894	188.905	-0.178456	0.0148318	0.180388	FALSE	FALSE
Rsad1	10.6709	9.96326	10.4943	7.45615	6.27105	10.1032	6.43362	0.454811	0.0148408	0.180388	FALSE	FALSE
Shank1	3.63781	2.27803	2.48878	1.4871	1.91801	2.21601	1.47258	0.655662	0.0148128	0.180388	FALSE	FALSE
Scrn1	2.18269	1.70226	1.34117	4.00691	2.56846	3.32401	1.80141	-0.744101	0.0148654	0.180499	FALSE	FALSE
Enpp5	5.15	3.70493	2.79296	2.27196	2.88535	1.98274	2.8022	0.642119	0.0149015	0.18075	FALSE	FALSE
Krt5	45.1088	37.237	37.3593	38.0037	60.1921	43.4163	72.9859	-0.427604	0.0149475	0.18112	FALSE	FALSE
Rplp1	876.241	1094.99	1099.04	1215.89	1112.59	1166.67	1174.38	-0.189847	0.0149782	0.181304	FALSE	FALSE
Srsf6	505.071	514.61	505.636	593.642	547.066	564.63	563.828	-0.157972	0.0149942	0.181311	FALSE	FALSE
Nbr1	125.911	124.303	127.965	108.517	118.166	111.048	112.388	0.163683	0.0150337	0.1816	FALSE	FALSE
Cyc1	153.373	176.885	169.002	199.54	180.977	179.307	190.893	-0.173216	0.0150519	0.181632	FALSE	FALSE
Hsd3b6	1.42659	1.99015	1.57622	1.36317	3.3857	2.90122	3.7172	-0.774622	0.0150858	0.181667	FALSE	FALSE
Trove2	104.098	105.691	117.705	86.6855	98.4522	104.983	91.286	0.194824	0.0150821	0.181667	FALSE	FALSE
Eps8l2	4.56509	4.18056	3.41515	2.35457	2.31829	3.35317	2.90228	0.565579	0.0151783	0.182404	FALSE	FALSE
Sesn3	53.9252	41.9683	40.8712	27.8005	43.347	37.8762	35.1991	0.337711	0.0151779	0.182404	FALSE	FALSE
Atf6	31.7417	35.0967	35.8107	27.8418	27.5693	33.2984	27.1499	0.240003	0.0152826	0.182907	FALSE	FALSE
Ggh	10.1573	9.68789	7.79816	6.50606	6.50455	7.14371	7.4916	0.413803	0.0152444	0.182907	FALSE	FALSE
Lrp6	209.466	193.407	196.682	159.078	189.95	178.432	174.637	0.187065	0.0152661	0.182907	FALSE	FALSE
Unc5c	46.407	45.9737	50.2871	61.0743	58.4742	79.0182	43.5342	-0.347897	0.0152719	0.182907	FALSE	FALSE
Mt2	9.48684	9.58776	10.1763	6.62998	7.18836	8.06219	8.03488	0.380728	0.0153131	0.183084	FALSE	FALSE
Prickle1	47.0633	55.3486	56.9653	46.1827	40.6785	48.4897	47.4658	0.217008	0.0153423	0.183245	FALSE	FALSE
Lipt2	14.4228	15.1451	15.9005	18.754	18.5463	18.0488	17.9427	-0.273324	0.0153792	0.183499	FALSE	FALSE
Pcolce2	5.63504	6.12064	6.12515	9.83138	7.18836	7.65397	7.54878	-0.432362	0.0153978	0.183533	FALSE	FALSE
Bola2	41.7563	48.7148	47.2591	55.8902	50.8856	50.9973	52.9702	-0.198	0.0154363	0.183739	FALSE	FALSE
Gpr180	21.8982	22.4298	22.6893	28.1929	25.0342	25.557	26.3064	-0.233316	0.0154464	0.183739	FALSE	FALSE
Hint1	173.702	203.17	187.391	215.629	207.428	204.616	218.643	-0.169675	0.0154685	0.183814	FALSE	FALSE
Atad3a	96.9654	120.097	118.507	145.426	114.23	133.791	126.657	-0.216845	0.0155014	0.184006	FALSE	FALSE
Pcdhgc4	8.37409	4.55606	4.18944	2.23065	4.55319	3.1928	3.88877	0.716237	0.0155161	0.184006	FALSE	FALSE
Ankrd13b	74.7106	80.3194	85.4341	100.524	90.3632	84.2229	90.7999	-0.190138	0.0155319	0.184007	FALSE	FALSE
Anxa7	28.489	32.8437	32.838	26.2101	26.6853	27.7001	26.8782	0.224309	0.0155511	0.184047	FALSE	FALSE
Nop2	98.763	126.068	122.876	159.863	122.085	144.288	123.311	-0.244996	0.0156006	0.184447	FALSE	FALSE
Rmnd5a	187.797	178.437	184.792	151.126	166.567	177.062	153.864	0.179593	0.0156664	0.185038	FALSE	FALSE
Rpl38	207.027	238.367	238.425	249.068	243.053	259.958	278.819	-0.17724	0.0157356	0.185667	FALSE	FALSE
Nxph3	3.99446	3.46711	3.51194	2.00345	2.51843	3.25112	1.84431	0.602386	0.0157968	0.186202	FALSE	FALSE
Lifr	35.1084	34.5334	38.7696	27.8418	28.8535	36.7974	23.5471	0.304246	0.0158272	0.186372	FALSE	FALSE
Rictor	52.4843	52.6826	57.7534	43.4977	49.4179	50.9973	43.9631	0.208993	0.0158452	0.186396	FALSE	FALSE
Hunk	137.852	151.627	143.423	117.915	135.128	130.001	128.958	0.172753	0.0158908	0.186745	FALSE	FALSE
Reln	6.277	9.83809	9.5403	4.83307	5.10357	8.3975	4.83237	0.560881	0.0159172	0.186867	FALSE	FALSE
Idi1	177.126	233.899	201.591	152.882	194.136	172.572	177.01	0.229626	0.0159523	0.187091	FALSE	FALSE
Igsf11	0.927285	0.963782	0.815765	3.34597	0.967343	1.63285	1.04368	-0.943492	0.0160021	0.187215	FALSE	FALSE
Lsm4	154.571	173.456	163.651	194.686	175.84	176.523	189.692	-0.16821	0.0160109	0.187215	FALSE	FALSE
Mmachc	25.051	25.8469	25.5791	31.952	28.2364	29.26	29.5804	-0.222506	0.0159893	0.187215	FALSE	FALSE
D930048N14Rik	1.76897	2.11531	2.21224	3.86233	2.80196	3.28027	2.40189	-0.598706	0.0161017	0.188089	FALSE	FALSE
4933412E12Rik	1.95443	1.46445	1.32735	2.49915	2.25158	2.23059	2.70212	-0.614239	0.0162087	0.18822	FALSE	FALSE
Ebna1bp2	87.5785	108.882	108.912	133.157	106.241	121.079	113.375	-0.21847	0.0161729	0.18822	FALSE	FALSE
Gdf10	2.25402	0.988816	0.926377	0.640279	0.967343	0.510265	0.900707	0.87573	0.0162256	0.18822	FALSE	FALSE
Mthfd1l	74.3254	92.1351	90.3564	117.708	83.0581	115.786	95.5035	-0.266802	0.0162099	0.18822	FALSE	FALSE
Nle1	27.9612	34.2831	33.5155	46.3273	34.4074	37.0015	35.9997	-0.266711	0.016166	0.18822	FALSE	FALSE
Plaur	1.08421	1.16405	0.788112	2.10672	1.20084	1.93901	1.44399	-0.719512	0.0161727	0.18822	FALSE	FALSE
Srp9	75.6236	92.5606	86.6923	82.1416	64.3283	78.2017	61.6913	0.247503	0.0162053	0.18822	FALSE	FALSE
Mrps28	19.3303	21.416	22.1363	26.0449	22.5991	24.5365	26.6209	-0.251106	0.0162527	0.188348	FALSE	FALSE
Dpysl2	80.6738	84.1119	78.7697	70.8438	73.7016	69.848	73.6721	0.172892	0.0163635	0.189426	FALSE	FALSE
Ier5l	57.8198	50.1292	48.5449	61.3429	63.8113	53.8694	66.2234	-0.233152	0.0163781	0.189426	FALSE	FALSE
Got1	50.0306	54.3348	51.8495	70.3068	55.1219	57.1788	60.0042	-0.219299	0.0164008	0.1895	FALSE	FALSE
Angpt2	4.08005	3.89268	3.49811	3.42859	1.63448	2.85748	1.27243	0.738761	0.0164194	0.189528	FALSE	FALSE
Bod1l	99.4762	99.1319	114.027	81.935	89.4459	104.021	83.9373	0.213821	0.0164551	0.189566	FALSE	FALSE
Eif2b2	64.4677	70.8317	66.4365	79.188	75.7363	74.382	74.773	-0.17653	0.0164502	0.189566	FALSE	FALSE
Nt5c	23.6244	26.5228	26.8235	29.8246	28.1864	31.1991	30.7384	-0.225055	0.0164724	0.189579	FALSE	FALSE
Grrp1	7.67506	9.03702	9.87214	14.334	9.82354	14.5644	9.66473	-0.44793	0.0165234	0.189978	FALSE	FALSE
Etohi1	21.299	18.6373	21.5003	15.3667	17.9626	18.1654	15.5265	0.288653	0.0165978	0.190459	FALSE	FALSE
Sh3bp1	31.6418	29.8272	29.7409	36.9296	38.0433	30.3243	39.1164	-0.247711	0.0165898	0.190459	FALSE	FALSE
Wdfy3	167.168	168.662	194.581	138.817	161.363	170.239	143.57	0.203741	0.0166644	0.191036	FALSE	FALSE
Glul	186.898	168.336	167.522	198.053	198.055	186.917	204.232	-0.175687	0.0167241	0.191176	FALSE	FALSE
Ift27	27.4191	22.4549	24.5283	16.1102	18.1293	20.5272	24.2047	0.327254	0.0166988	0.191176	FALSE	FALSE
Rpl11	877.254	969.164	962.133	1056.21	1032.02	1024.8	1053.08	-0.153823	0.0167256	0.191176	FALSE	FALSE
Emc8	105.496	114.665	112.659	127.787	120.084	119.46	129.044	-0.161496	0.0167845	0.191474	FALSE	FALSE
Lrrc58	227.356	232.434	250.675	207.203	202.408	232.987	194.624	0.178146	0.0167713	0.191474	FALSE	FALSE
Xrcc4	8.06024	7.07191	7.01005	5.86578	5.07021	5.5546	5.6187	0.417279	0.0168029	0.191498	FALSE	FALSE
Tpp1	34.5806	26.9984	33.958	24.9502	25.5012	26.6212	28.9656	0.263597	0.0168331	0.191655	FALSE	FALSE
Nmd3	54.6813	66.4509	66.4918	77.3498	63.311	80.3011	71.6991	-0.226153	0.016861	0.191683	FALSE	FALSE
Wdr4	62.9412	68.1907	69.7134	83.195	71.1498	74.834	75.7309	-0.186791	0.0168683	0.191683	FALSE	FALSE
Fam111a	48.875	39.4275	41.5625	36.31	35.9585	40.2235	34.2555	0.238369	0.0168909	0.191753	FALSE	FALSE
Hmgcs1	445.924	525.699	441.495	344.119	461.49	365.772	424.705	0.239345	0.0169107	0.191791	FALSE	FALSE
Col6a3	9.62949	4.99414	6.26342	4.37868	4.65326	4.3737	5.30416	0.572192	0.0169299	0.191823	FALSE	FALSE
Actr3	306.674	316.771	303.478	348.023	339.204	342.052	344.013	-0.152041	0.0169866	0.192108	FALSE	FALSE
Spats2l	12.3258	11.7657	10.8815	9.4596	8.6227	8.57245	9.92208	0.350383	0.0169879	0.192108	FALSE	FALSE
Ttc9c	93.884	112.575	116.945	95.6907	97.2347	92.0809	94.7172	0.183602	0.0170094	0.192165	FALSE	FALSE
Polr2c	78.1772	82.3721	84.5216	97.5496	89.0623	87.299	93.8308	-0.170131	0.0171061	0.193071	FALSE	FALSE
Slc7a1	45.4369	67.6901	64.2242	83.133	60.2088	83.1294	67.4387	-0.313395	0.0171597	0.193489	FALSE	FALSE
Ccdc88a	96.9369	91.0837	105.814	74.5615	88.5786	93.6117	82.4076	0.207587	0.0172362	0.193606	FALSE	FALSE
Sema4f	5.84903	3.11665	3.05566	1.81757	2.58514	1.95359	3.38837	0.713847	0.0171942	0.193606	FALSE	FALSE
Slc7a6os	40.2156	44.0586	41.8667	51.5734	44.3644	47.9795	48.967	-0.197158	0.0172263	0.193606	FALSE	FALSE
Tmem229a	3.56648	4.94408	3.99587	2.85027	2.25158	3.04701	3.274	0.544906	0.0172115	0.193606	FALSE	FALSE
Msmo1	91.8297	118.983	96.924	71.9384	96.3841	78.333	95.2748	0.262846	0.0172967	0.194099	FALSE	FALSE
Pin1	91.8155	109.471	103.021	123.718	110.894	109.809	115.891	-0.181652	0.0173217	0.194193	FALSE	FALSE
Npas3	2.02576	1.53955	1.79745	1.03271	1.11745	1.28295	1.20094	0.620001	0.0174165	0.195068	FALSE	FALSE
Ntm	5.79196	6.98429	8.62775	4.64719	4.35305	6.75008	3.53134	0.565052	0.0174332	0.195068	FALSE	FALSE
Rpl34	4.10858	8.73662	7.30041	4.06887	5.03686	3.45522	5.00393	0.613088	0.0174534	0.195107	FALSE	FALSE
D130040H23Rik	2.43947	2.15286	2.08781	1.28056	1.55109	1.61827	1.48688	0.58096	0.017481	0.19523	FALSE	FALSE
Fam222a	4.45097	4.68123	4.09265	5.65924	7.42186	5.4817	6.19057	-0.489074	0.0175323	0.195429	FALSE	FALSE
Sugp2	29.1881	26.8733	26.9617	34.2859	32.6228	30.543	31.8107	-0.223211	0.0175179	0.195429	FALSE	FALSE
Ankrd52	134.813	143.503	152.479	161.35	162.764	162.498	155.422	-0.160541	0.0175844	0.195571	FALSE	FALSE
Bivm	44.9519	40.8669	50.1488	41.4116	38.1267	39.4216	37.2721	0.214842	0.0176454	0.195571	FALSE	FALSE
Cnbp	652.509	751.099	761.206	891.289	752.793	847.04	783.515	-0.182006	0.0176007	0.195571	FALSE	FALSE
Reep2	3.19557	2.51585	2.83444	2.04476	1.7679	2.05564	1.90149	0.551634	0.0176398	0.195571	FALSE	FALSE
Snx5	277.601	304.217	318.771	385.51	321.358	356.179	310.715	-0.194017	0.0176094	0.195571	FALSE	FALSE
Wnt11	7.28988	7.28469	5.65505	8.55082	8.7728	8.60161	9.99356	-0.413536	0.0176276	0.195571	FALSE	FALSE
Psmb7	259.554	281.287	268.553	308.201	300.193	286.419	308.714	-0.157236	0.0177108	0.19611	FALSE	FALSE
Pdgfra	336.833	250.884	266.493	199.457	278.628	225.887	235.528	0.277625	0.0177458	0.196312	FALSE	FALSE
Setd2	189.808	178.951	207.688	148.627	175.539	184.745	160.126	0.199897	0.0177685	0.196377	FALSE	FALSE
Bop1	92.6714	128.283	121.922	153.605	119.384	135.862	132.032	-0.24228	0.0178199	0.196388	FALSE	FALSE
Chrna1	0.913019	1.36432	1.27204	1.7143	1.98472	1.54537	2.23032	-0.657964	0.01779	0.196388	FALSE	FALSE
Dos	20.2433	21.3784	19.5231	17.3288	18.6297	15.0893	16.1698	0.279329	0.017806	0.196388	FALSE	FALSE
Adcy2	4.63642	2.39068	2.53025	1.17729	1.8513	2.69711	1.8586	0.741929	0.0179037	0.19697	FALSE	FALSE
Elavl2	9.30138	9.80054	12.112	7.97251	6.80476	8.96608	7.9491	0.392435	0.0179064	0.19697	FALSE	FALSE
D2hgdh	17.8039	16.572	16.0388	12.0414	14.2099	13.1648	14.9832	0.303982	0.0179474	0.197236	FALSE	FALSE
Ajap1	1.44086	1.66471	0.829592	1.36317	2.46839	2.2889	2.74501	-0.75892	0.0179934	0.197555	FALSE	FALSE
A930015D03Rik	1.59778	1.62716	1.39648	1.52841	2.75193	2.55132	2.8022	-0.648741	0.0181026	0.198568	FALSE	FALSE
Cchcr1	26.4633	21.6914	19.9655	16.482	19.0467	17.801	20.1444	0.30486	0.0181266	0.198646	FALSE	FALSE
Asb6	38.0329	42.832	38.2995	49.4461	44.9981	42.0167	47.28	-0.20894	0.0181812	0.199057	FALSE	FALSE
Col2a1	313.294	209.053	209.845	134.417	212.749	180.619	221.574	0.38144	0.0182496	0.199496	FALSE	FALSE
Sec13	106.952	111.674	109.188	124.131	116.081	120.831	126.328	-0.157057	0.0182554	0.199496	FALSE	FALSE
March9	11.7836	11.9159	10.4805	7.33223	9.80686	7.5665	9.95067	0.393875	0.0183078	0.199881	FALSE	FALSE
Hnrnpab	1752.74	1977.12	1937.01	2268.78	2016.29	2074.36	2100.58	-0.163048	0.0183349	0.199935	FALSE	FALSE
Tbc1d32	16.363	14.8948	15.3198	11.0913	12.2586	13.7917	12.953	0.308339	0.0183469	0.199935	FALSE	FALSE
Lbr	158.323	179.664	175.39	162.693	148.037	152.248	147.988	0.164229	0.0183989	0.200315	FALSE	FALSE
Eif4a3	235.816	261.035	257.464	298.515	269.455	271.811	285.138	-0.161412	0.0184555	0.200744	FALSE	FALSE
Pcdhgb5	3.29543	2.34061	2.65469	1.90018	1.7679	1.88069	1.91579	0.564878	0.0185162	0.201218	FALSE	FALSE
Arhgap10	59.603	62.2829	67.7776	69.5632	72.5174	70.1687	73.4434	-0.176117	0.0187074	0.202385	FALSE	FALSE
Asb13	17.9893	18.9377	17.9745	23.3805	20.5977	21.2999	21.8028	-0.249706	0.0187621	0.202385	FALSE	FALSE
Fam214a	6.02022	4.98163	5.51678	2.80897	4.93679	3.63017	3.76009	0.53869	0.0187259	0.202385	FALSE	FALSE
Gnai1	28.0183	30.1902	28.054	34.8023	31.005	31.9572	36.157	-0.219261	0.018689	0.202385	FALSE	FALSE
Higd2a	32.0841	33.482	31.483	38.6026	40.3616	33.6921	37.6867	-0.215872	0.0187536	0.202385	FALSE	FALSE
Nfic	33.2824	21.5537	21.763	17.3495	20.7812	21.1979	20.2159	0.359619	0.0187586	0.202385	FALSE	FALSE
Ppp5c	127.609	145.894	141.639	165.089	151.139	149.624	155.165	-0.165711	0.018672	0.202385	FALSE	FALSE
Tarbp2	71.458	77.9162	78.5762	90.2793	84.0922	82.2839	85.3813	-0.170004	0.0186672	0.202385	FALSE	FALSE
Tcf7l2	45.8507	34.1579	36.8477	29.6181	36.8925	29.0268	32.5684	0.282046	0.0187854	0.202449	FALSE	FALSE
Dus3l	36.8346	45.6983	41.5349	54.5683	45.782	47.2214	45.6787	-0.223311	0.0189128	0.203635	FALSE	FALSE
Tbx4	163.972	155.006	151.235	147.719	137.379	105.377	142.326	0.23497	0.0189652	0.204011	FALSE	FALSE
Col5a1	112.544	98.456	110.432	87.016	99.5196	99.0351	90.5139	0.188157	0.019038	0.204043	FALSE	FALSE
Hira	150.377	158.649	160.595	178.121	171.887	169.466	176.124	-0.151616	0.018998	0.204043	FALSE	FALSE
Lrrc59	276.83	330.415	310.585	369.792	323.176	341.907	345.2	-0.173286	0.0190116	0.204043	FALSE	FALSE
Scoc	41.6565	42.9196	41.1892	52.1311	45.5485	48.169	46.0218	-0.193707	0.0190294	0.204043	FALSE	FALSE
Map2k2	162.332	171.816	171.269	193.447	180.827	181.975	193.552	-0.153899	0.0190973	0.204491	FALSE	FALSE
Nynrin	316.061	265.453	284.439	220.814	278.828	245.233	252.47	0.211101	0.0192346	0.205773	FALSE	FALSE
Rprd2	78.7479	76.8898	80.0003	70.3894	71.8336	71.4517	64.6222	0.17512	0.0192929	0.206208	FALSE	FALSE
Slitrk6	46.6496	44.0711	39.8066	26.1688	31.7389	36.0976	44.7065	0.326162	0.0193268	0.206382	FALSE	FALSE
Cux1	124.499	108.695	114.995	94.72	107.659	104.91	101.308	0.183909	0.0194893	0.207711	FALSE	FALSE
Peak1	34.8516	36.8741	40.1937	29.3289	34.0238	35.3978	25.6487	0.262419	0.0194743	0.207711	FALSE	FALSE
Slfn9	33.9386	27.7119	29.6579	13.1154	26.3851	26.6796	23.9188	0.432944	0.0195046	0.207711	FALSE	FALSE
Boc	68.4764	49.2655	47.2729	35.8763	50.6021	37.4097	49.3244	0.344629	0.0196037	0.208577	FALSE	FALSE
Shf	24.5088	26.698	25.1505	31.2911	28.6367	29.26	29.0371	-0.214911	0.0197031	0.209334	FALSE	FALSE
Tmem41a	25.3648	27.2488	25.662	33.0673	28.1864	29.3038	31.3532	-0.223422	0.0197106	0.209334	FALSE	FALSE
Kti12	51.8281	61.4192	60.6708	72.1656	61.8099	66.5969	64.9653	-0.194919	0.0199296	0.210702	FALSE	FALSE
Mki67	566.4	502.544	615.156	389.827	489.743	558.39	458.031	0.243966	0.01987	0.210702	FALSE	FALSE
Prr7	9.81495	9.75047	9.40204	13.3839	11.925	10.701	12.953	-0.341312	0.0199284	0.210702	FALSE	FALSE
Sf3b5	88.2062	98.0429	90.0107	106.575	102.205	100.581	102.523	-0.160858	0.019898	0.210702	FALSE	FALSE
Tyk2	24.9226	21.5036	20.8089	17.3495	18.5463	18.4862	19.9871	0.268584	0.0198947	0.210702	FALSE	FALSE
Clcn6	18.831	17.8362	17.933	21.8934	23.3663	20.2648	21.3739	-0.255115	0.0199509	0.210737	FALSE	FALSE
Tnrc18	381.257	290.361	295.86	229.282	304.363	244.621	292.687	0.268339	0.0200468	0.211558	FALSE	FALSE
Dlk1	123.143	270.097	326.168	447.121	284.766	517.817	236.915	-0.632084	0.0201353	0.21176	FALSE	FALSE
Gkap1	21.9125	21.7539	22.0533	17.2462	18.0626	19.9295	18.4573	0.24888	0.0201383	0.21176	FALSE	FALSE
Nars	180.335	213.484	199.835	239.072	213.9	225.872	212.495	-0.171099	0.0201064	0.21176	FALSE	FALSE
Ntn3	39.2455	27.4991	26.8649	39.1603	44.1142	30.7908	45.8074	-0.357331	0.0200905	0.21176	FALSE	FALSE
Fsd1l	17.6041	16.572	17.5044	12.723	14.7603	15.6141	13.1532	0.291769	0.0202242	0.212472	FALSE	FALSE
Bcl9l	77.3641	71.4951	74.76	63.0571	70.8996	58.5493	67.3958	0.198038	0.0202538	0.212592	FALSE	FALSE
Hnrnpa0	1617.18	1770.77	1708.21	1994.1	1884.18	1778.78	1918.56	-0.156894	0.0202785	0.21266	FALSE	FALSE
Tgfbr3	18.3317	21.9918	22.5372	17.2049	17.4789	18.5299	16.5702	0.264413	0.020303	0.212726	FALSE	FALSE
E130309D02Rik	89.0193	99.9455	95.5551	113.557	102.789	100.114	110.044	-0.168629	0.0203662	0.212817	FALSE	FALSE
Hspa4l	6.49099	7.38483	7.16214	4.02756	5.52053	5.65665	5.41854	0.441208	0.0203629	0.212817	FALSE	FALSE
Jmjd6	65.9656	74.3364	71.9533	93.3568	78.9719	74.6882	78.4759	-0.201072	0.0203668	0.212817	FALSE	FALSE
Piezo2	24.8084	21.2157	23.0626	18.1963	20.481	20.848	15.3406	0.299018	0.0203844	0.212817	FALSE	FALSE
Enkd1	22.9253	24.0695	22.7723	30.5682	28.6033	24.172	26.964	-0.244675	0.0204136	0.212932	FALSE	FALSE
Lsm7	69.8887	77.0775	76.2256	83.5874	81.3069	81.3945	88.0977	-0.168153	0.0204476	0.213004	FALSE	FALSE
Mtdh	192.333	205.962	206.181	231.781	216.968	228.293	217.957	-0.151054	0.020457	0.213004	FALSE	FALSE
Trmt1l	38.0044	44.722	44.6182	39.7593	35.0078	37.3222	35.1991	0.205904	0.020482	0.213075	FALSE	FALSE
Acer2	10.6994	10.7268	12.5268	13.2393	15.8611	14.6956	12.9101	-0.325192	0.020513	0.213208	FALSE	FALSE
Fgf10	25.1365	30.2402	34.5248	47.0915	32.8396	36.4329	32.2825	-0.309376	0.0205846	0.213762	FALSE	FALSE
Pa2g4	390.972	482.229	486.735	564.871	476.95	528.037	501.765	-0.192108	0.0206443	0.214191	FALSE	FALSE
Mlh3	26.0068	26.8482	26.7682	22.9674	22.9327	22.8016	22.8322	0.214025	0.0207273	0.214862	FALSE	FALSE
Ccdc15	6.91897	5.92038	7.93643	4.64719	5.25368	5.74413	4.70369	0.443465	0.0209226	0.216407	FALSE	FALSE
Chd2	108.121	97.2419	111.11	82.7612	98.5022	97.8251	90.5997	0.190381	0.0209072	0.216407	FALSE	FALSE
Zfp946	29.2879	26.6855	25.344	21.5423	24.4171	22.4079	23.4756	0.238881	0.0209318	0.216407	FALSE	FALSE
Cdc25b	44.4954	33.2943	31.4968	40.1104	45.6986	41.7105	50.7827	-0.291744	0.0209835	0.216749	FALSE	FALSE
Terf1	45.9933	45.0349	43.7748	38.0863	41.1121	37.2056	40.8178	0.19291	0.0210622	0.21737	FALSE	FALSE
Chd8	190.479	191.104	216.219	164.469	182.127	190.212	169.562	0.174115	0.0211032	0.217551	FALSE	FALSE
Ep300	158.181	162.979	179.925	133.488	152.874	159.859	143.956	0.178698	0.021117	0.217551	FALSE	FALSE
Fgf8	45.9077	62.0826	33.9026	51.4908	63.8113	54.1464	82.4933	-0.413329	0.0211457	0.217655	FALSE	FALSE
Elmod2	42.812	36.048	37.9676	31.3737	35.6416	32.2487	34.3412	0.220876	0.0212345	0.217917	FALSE	FALSE
Nhp2l1	204.288	204.522	209.168	248.531	223.706	225.741	220.988	-0.157237	0.0212456	0.217917	FALSE	FALSE
Rab30	7.0331	6.55873	6.87178	5.01896	5.20364	5.51086	4.74658	0.413416	0.0212407	0.217917	FALSE	FALSE
Rps17	568.811	610.074	609.93	668.554	659.161	657.527	656.93	-0.14766	0.0212159	0.217917	FALSE	FALSE
Rbms3	25.1365	24.4951	24.708	29.9485	29.3539	31.1116	25.7917	-0.229106	0.0212798	0.218076	FALSE	FALSE
Map9	25.2935	24.8581	24.7495	21.0053	22.5825	21.2999	20.3017	0.229425	0.0213307	0.218406	FALSE	FALSE
Zfp292	148.522	132.151	140.464	115.106	132.743	130.526	116.32	0.182582	0.021396	0.218883	FALSE	FALSE
Ccdc82	48.1903	39.9782	44.7012	38.458	36.9258	39.1592	38.9878	0.206137	0.0215284	0.219661	FALSE	FALSE
Rbm7	60.1023	55.7116	55.8868	63.5115	65.9962	62.7626	66.8954	-0.179132	0.0215164	0.219661	FALSE	FALSE
Toe1	28.0896	32.2304	30.3216	35.174	33.5902	35.5582	34.6701	-0.201405	0.0215164	0.219661	FALSE	FALSE
Stxbp5	22.4974	27.8496	27.6945	23.3392	21.2649	23.3701	18.3144	0.271061	0.0215698	0.219891	FALSE	FALSE
Shmt2	114.513	141.726	138.915	169.922	143.767	147.408	142.598	-0.195996	0.0215981	0.219989	FALSE	FALSE
Ctsl	81.4156	87.3662	86.6509	99.3258	90.7468	106.179	89.1414	-0.178219	0.021634	0.220123	FALSE	FALSE
Loxl3	12.34	7.54754	8.21296	6.52671	7.25508	6.42934	7.09128	0.45565	0.021649	0.220123	FALSE	FALSE
Tsta3	37.9473	39.1771	38.7834	44.8195	44.1309	41.5793	45.1926	-0.185021	0.0216708	0.220154	FALSE	FALSE
Ppp1r3b	5.47811	3.70493	4.05117	2.00345	3.26895	3.63017	2.85939	0.580545	0.0217815	0.221086	FALSE	FALSE
Stat5b	39.3597	37.988	40.1108	32.3238	35.2914	34.0565	35.3134	0.192572	0.0218391	0.221478	FALSE	FALSE
Dync1h1	403.611	438.221	551.748	330.838	394.209	466.411	360.983	0.259217	0.0218863	0.221765	FALSE	FALSE
Cenpb	173.73	160.614	150.419	176.944	180.927	182.121	186.06	-0.167857	0.0219679	0.222399	FALSE	FALSE
Cntn2	5.96315	8.79921	6.48464	7.58008	9.32319	9.8554	12.1953	-0.460277	0.02207	0.222537	FALSE	FALSE
Dio3	0.513573	1.36432	1.38265	2.68504	0.984022	3.29485	1.51548	-0.960089	0.0220767	0.222537	FALSE	FALSE
Htatip2	0.913019	1.08895	1.64536	1.67299	1.91801	1.82237	2.20173	-0.648656	0.0220436	0.222537	FALSE	FALSE
Nlgn2	45.7223	41.1422	44.1343	34.6577	40.9286	39.1446	36.2999	0.209166	0.022052	0.222537	FALSE	FALSE
Wdr81	25.9497	21.9417	23.2977	16.8951	20.8479	21.3145	19.501	0.271563	0.0220232	0.222537	FALSE	FALSE
Mtch2	96.3805	98.819	96.7027	108.228	103.756	112.914	107.699	-0.152537	0.0220981	0.222561	FALSE	FALSE
Sdccag3	57.7484	61.8323	58.0576	71.7732	65.1789	62.6751	68.6682	-0.179345	0.0221288	0.222678	FALSE	FALSE
Nedd4l	16.9622	13.2677	13.0108	9.97596	12.8256	11.6195	10.737	0.35144	0.0221853	0.223055	FALSE	FALSE
Psmb3	112.786	128.408	124.729	135.884	132.476	132.173	143.956	-0.158273	0.0222812	0.223826	FALSE	FALSE
Plekhj1	59.2749	67.4022	63.8233	77.9281	70.466	68.9149	70.4982	-0.179644	0.022309	0.223913	FALSE	FALSE
Ube2h	144.014	126.243	126.831	111.594	129.941	109.182	112.102	0.19401	0.0223492	0.224124	FALSE	FALSE
Ctu2	31.9699	39.2898	37.1934	44.4891	38.6103	41.5356	42.4333	-0.207703	0.0223808	0.224218	FALSE	FALSE
Rufy3	29.3878	28.7007	28.3029	25.0122	24.4671	26.1547	23.9045	0.210637	0.0223969	0.224218	FALSE	FALSE
Dpysl4	24.4518	22.3422	22.8967	24.4545	27.8862	26.8837	30.767	-0.244406	0.0224419	0.224434	FALSE	FALSE
Zmym6	20.2576	17.8613	19.1774	14.871	16.745	16.3722	15.5265	0.265592	0.0224569	0.224434	FALSE	FALSE
Tgfbr1	318.244	275.204	307.115	251.65	276.043	276.228	262.049	0.171647	0.0225266	0.224939	FALSE	FALSE
Bahcc1	246.9	244.187	256.468	206.335	233.297	226.966	226.95	0.157511	0.0226057	0.225152	FALSE	FALSE
Nop16	64.9242	81.8088	79.1292	96.6202	80.4563	87.0949	82.9365	-0.204384	0.0225953	0.225152	FALSE	FALSE
Urm1	35.4651	37.9255	36.1011	43.0226	41.479	40.1943	41.2467	-0.184296	0.0225982	0.225152	FALSE	FALSE
Rps29	321.397	355.548	373.537	381.771	385.486	374.505	435.056	-0.170963	0.0226414	0.225315	FALSE	FALSE
4632415L05Rik	31.3708	29.0762	27.1138	26.6026	28.6033	16.8096	17.7711	0.379982	0.0227989	0.225329	FALSE	FALSE
Fdft1	100.147	112.149	97.9471	79.0641	98.7191	81.1321	98.0198	0.212576	0.022728	0.225329	FALSE	FALSE
Gm1821	172.618	65.5998	69.4921	72.7646	72.1338	64.4683	70.6555	0.551011	0.0228016	0.225329	FALSE	FALSE
Haghl	9.61523	10.1886	8.72454	11.6696	12.0418	11.3425	12.7529	-0.329715	0.0228068	0.225329	FALSE	FALSE
Pard3b	8.06024	5.79521	6.63673	4.62653	5.08689	5.16097	5.18979	0.443732	0.0228339	0.225329	FALSE	FALSE
Snrpd2	173.431	189.878	182.358	209.268	203.142	191.218	205.947	-0.153953	0.0227367	0.225329	FALSE	FALSE
Sox6	24.7228	31.7673	43.996	27.9038	18.046	32.8611	18.872	0.456015	0.0228057	0.225329	FALSE	FALSE
Tmem106b	48.6182	44.5468	44.5767	37.1775	42.4464	40.8941	39.4595	0.198607	0.0228547	0.225329	FALSE	FALSE
Tubgcp3	68.7903	71.4451	75.2578	83.5667	79.6557	79.0182	79.4481	-0.162729	0.0228369	0.225329	FALSE	FALSE
Zfp598	83.5127	94.4256	90.3564	114.094	99.2194	94.4573	98.1628	-0.181791	0.0228075	0.225329	FALSE	FALSE
Zfp955b	18.6028	17.0852	17.5044	13.7144	15.4775	15.1476	14.397	0.271243	0.0228347	0.225329	FALSE	FALSE
Ncapd2	259.155	401.572	423.189	230.955	242.92	228.759	394.124	0.397988	0.0229129	0.225713	FALSE	FALSE
Col24a1	4.00872	3.56725	3.77464	2.78831	2.81864	2.85748	2.30181	0.491854	0.0230286	0.22647	FALSE	FALSE
Naa30	61.3292	66.4759	64.1551	73.0951	71.6501	75.1402	68.1106	-0.169979	0.023028	0.22647	FALSE	FALSE
Ino80d	46.6781	47.3505	49.4437	39.4494	40.1281	47.9941	37.3293	0.213857	0.0230673	0.226471	FALSE	FALSE
Nrm	35.0086	31.8298	32.0775	30.1964	28.6367	24.1428	29.1801	0.23439	0.0230574	0.226471	FALSE	FALSE
Adam22	10.2715	9.57524	8.37888	3.84167	5.72067	7.26034	9.00707	0.539617	0.0230919	0.226522	FALSE	FALSE
Mpped2	53.326	33.9452	38.8249	31.8694	35.5249	30.9221	37.3579	0.308921	0.0231646	0.227044	FALSE	FALSE
Emg1	82.7138	94.8637	93.5503	108.806	95.9671	99.5891	101.766	-0.167546	0.023217	0.227367	FALSE	FALSE
6820431F20Rik	259.269	218.078	229.216	159.781	219.003	200.243	219.687	0.23794	0.0233209	0.228003	FALSE	FALSE
Ltbp1	53.3831	48.9151	52.2504	35.236	42.7299	54.6858	34.2984	0.303131	0.0233083	0.228003	FALSE	FALSE
D10Wsu102e	87.7639	100.096	98.1822	115.684	100.12	110.071	103.152	-0.16944	0.023416	0.228096	FALSE	FALSE
Mgme1	27.7329	24.6203	26.699	23.2979	22.1655	23.0786	21.6742	0.224528	0.023366	0.228096	FALSE	FALSE
Psma3	199.652	224.399	222.331	240.456	228.893	241.21	246.88	-0.151734	0.0234169	0.228096	FALSE	FALSE
Ptpn13	118.193	121.437	129.72	99.553	97.6183	130.176	94.0453	0.224667	0.023428	0.228096	FALSE	FALSE
Sspn	4.96454	4.59361	3.37367	2.37523	2.53511	2.58048	4.04603	0.576243	0.0234169	0.228096	FALSE	FALSE
Wisp1	9.37271	8.98696	9.84449	6.11363	5.32039	8.92235	7.463	0.432581	0.0234661	0.228277	FALSE	FALSE
Lhpp	16.3202	21.0029	20.961	28.2755	21.0647	23.5742	22.1746	-0.289734	0.0235005	0.228422	FALSE	FALSE
Pot1b	19.9152	18.5121	17.8224	15.7178	15.3441	16.1973	15.4693	0.257571	0.0235375	0.228592	FALSE	FALSE
Plekhb2	20.7569	22.5049	22.8276	19.0225	18.3795	18.6903	18.9148	0.232635	0.0236322	0.229321	FALSE	FALSE
Trak2	41.1857	40.2661	40.1522	43.3531	45.8821	49.5394	45.9075	-0.188364	0.0236965	0.229754	FALSE	FALSE
Slc19a1	23.0537	29.9899	28.3167	39.8212	28.053	33.036	30.7813	-0.278554	0.0237864	0.230434	FALSE	FALSE
Camk2g	53.2689	49.253	48.0887	57.0055	54.9718	56.5811	59.318	-0.182574	0.0238634	0.230518	FALSE	FALSE
Chd9	67.9486	59.6544	63.7403	51.1604	56.8731	57.6745	57.9312	0.189341	0.0238936	0.230518	FALSE	FALSE
Mfap3l	2.19695	2.76618	3.56724	4.70915	4.56986	5.86076	2.63064	-0.642563	0.0238892	0.230518	FALSE	FALSE
St6galnac4	20.8425	20.8277	21.1131	27.3461	24.5338	22.3933	24.4764	-0.237315	0.0238692	0.230518	FALSE	FALSE
Timp2	83.8123	67.64	72.534	54.6922	63.6112	63.8997	71.9851	0.231848	0.0238616	0.230518	FALSE	FALSE
Gnal	8.88767	8.01066	7.4525	11.4631	10.4907	11.6049	8.72113	-0.380222	0.0239973	0.231327	FALSE	FALSE
Lrba	55.5087	38.1508	40.4564	26.1482	38.0099	28.6477	44.4206	0.381237	0.0240539	0.231682	FALSE	FALSE
Sik1	51.4572	52.6325	52.9418	68.0141	58.0573	57.7474	55.8152	-0.193946	0.0240814	0.231756	FALSE	FALSE
Exoc7	58.7185	51.3308	50.9231	43.952	46.249	45.9822	50.554	0.200236	0.0241879	0.232398	FALSE	FALSE
Gpr126	1.89737	1.36432	1.10612	2.45784	1.90133	2.53675	2.07306	-0.622768	0.024169	0.232398	FALSE	FALSE
Ift81	51.5285	39.0895	39.696	34.1826	37.9432	36.258	38.2443	0.244268	0.0242691	0.232988	FALSE	FALSE
Dag1	189.437	201.481	199.489	153.027	178.575	183.331	183.887	0.171542	0.0243305	0.233194	FALSE	FALSE
Zzz3	142.245	144.455	142.358	126.878	125.371	129.534	134.863	0.146902	0.024323	0.233194	FALSE	FALSE
Tulp4	138.622	119.834	121.217	95.8353	121.151	111.107	111.53	0.203189	0.0243515	0.233204	FALSE	FALSE
Fbxo31	27.0624	31.0538	30.5566	37.4873	31.7389	33.8087	33.9409	-0.211463	0.0243857	0.233341	FALSE	FALSE
Abca2	25.4647	24.3699	24.3485	18.4855	21.8486	21.3582	22.1031	0.238022	0.0244349	0.23362	FALSE	FALSE
Zc2hc1a	28.5746	26.0472	27.3765	23.0294	24.4338	24.0408	22.4033	0.219166	0.0244792	0.233852	FALSE	FALSE
Kcnk2	8.35983	11.6405	14.5179	11.1739	6.07091	8.83487	4.93244	0.571541	0.0245161	0.234013	FALSE	FALSE
Aak1	85.7382	82.8978	85.0055	68.262	80.3896	77.5894	72.657	0.177808	0.0245885	0.234385	FALSE	FALSE
Anpep	22.9253	19.5886	18.1819	16.1102	16.8618	15.0164	18.2858	0.28773	0.0246151	0.234385	FALSE	FALSE
Zfp84	25.5075	21.8541	22.2884	21.1705	18.563	20.4252	17.2993	0.262321	0.0246074	0.234385	FALSE	FALSE
Ap2b1	234.204	226.914	234.526	204.951	216.318	211.483	204.861	0.147056	0.0246464	0.234491	FALSE	FALSE
Arfgef2	69.1041	60.3428	61.5281	70.8025	74.3353	76.0441	68.8255	-0.187868	0.0246692	0.234518	FALSE	FALSE
Prr14l	81.6011	77.453	83.1527	68.6751	72.9844	77.8956	65.0368	0.182194	0.0246928	0.234551	FALSE	FALSE
BC049730	0	0.250333	0.967857	0.227196	0.333567	9.47635	0.400314	-2.67955	0.0247791	0.234799	FALSE	FALSE
Kntc1	81.0447	77.6158	84.7704	68.2826	74.0685	72.3701	74.487	0.166043	0.024762	0.234799	FALSE	FALSE
Mtus2	3.53795	2.16538	2.55791	1.46645	1.78458	2.23059	1.80141	0.591186	0.0247724	0.234799	FALSE	FALSE
Pdk1	59.1893	41.8181	46.7613	56.5098	72.951	51.216	61.9915	-0.300788	0.0248002	0.234809	FALSE	FALSE
Srsf2	726.249	825.248	805.063	931.957	821.058	858.601	892.429	-0.15726	0.0248559	0.235145	FALSE	FALSE
Ndufa5	38.5322	42.5441	40.1246	46.6784	44.5145	45.676	46.0361	-0.178338	0.0249003	0.235375	FALSE	FALSE
Pomk	21.028	20.5148	19.8964	17.7006	17.5956	17.2178	16.8847	0.239583	0.0249829	0.235965	FALSE	FALSE
Mrpl57	29.6303	32.8187	31.082	37.508	35.4248	34.2606	35.4707	-0.193333	0.0250166	0.236093	FALSE	FALSE
Zbtb45	29.5875	30.1276	30.7225	26.995	27.8862	23.0202	25.5915	0.221234	0.0250561	0.236275	FALSE	FALSE
Glrb	18.1177	11.8783	12.0982	8.26166	11.7415	8.45582	12.6385	0.448218	0.025122	0.236673	FALSE	FALSE
Hoxa11	89.6185	86.0895	77.2073	102.094	108.676	78.0997	111.302	-0.246819	0.0251591	0.236673	FALSE	FALSE
Tiam2	12.0547	9.51266	8.89046	6.69195	7.70539	7.9164	8.63535	0.390018	0.0251494	0.236673	FALSE	FALSE
Akap8	143.33	150.826	152.935	182.418	163.381	159.407	160.569	-0.159112	0.0252184	0.237041	FALSE	FALSE
Pgam5	81.5868	83.411	82.5444	95.9179	87.0609	90.9438	93.5163	-0.154609	0.0252575	0.237217	FALSE	FALSE
2810428I15Rik	40.3725	47.0751	48.462	44.613	39.978	34.6105	35.3849	0.23047	0.0253303	0.237242	FALSE	FALSE
4930402H24Rik	24.0095	15.8336	16.578	12.5164	16.5949	13.194	15.8124	0.371283	0.0253205	0.237242	FALSE	FALSE
Ccdc8	64.5675	60.3553	60.7123	50.8918	57.6236	53.2279	56.4872	0.181218	0.0253177	0.237242	FALSE	FALSE
Tug1	212.091	193.47	205.213	169.633	192.285	193.215	164.758	0.177792	0.0253413	0.237242	FALSE	FALSE
Lpl	29.0739	34.0453	35.5065	43.4563	34.7076	39.5528	36.0712	-0.225006	0.0253756	0.237374	FALSE	FALSE
Fh1	123.871	127.62	129.237	142.348	139.314	135.104	145.171	-0.146553	0.0254512	0.23789	FALSE	FALSE
Osr1	9.87202	9.90067	6.29107	6.27886	17.5289	20.2648	11.5519	-0.679402	0.0255738	0.237891	FALSE	FALSE
Pusl1	10.6138	13.4679	12.4854	19.828	14.9605	14.4332	13.0817	-0.351439	0.0255806	0.237891	FALSE	FALSE
Rb1cc1	71.5578	67.4397	69.4092	57.4186	64.5118	64.7307	58.8891	0.178049	0.0256141	0.237891	FALSE	FALSE
Slc25a46	56.6785	59.8046	55.5273	50.2929	50.1351	53.8986	48.8955	0.174465	0.0255466	0.237891	FALSE	FALSE
Tatdn2	45.7651	49.5159	50.2318	56.2413	50.6021	54.715	57.9884	-0.17828	0.0255054	0.237891	FALSE	FALSE
Tuba1c	37.7619	35.0341	33.8612	40.4408	40.0614	38.3573	44.7637	-0.202626	0.0255864	0.237891	FALSE	FALSE
Zfp52	3.1385	3.35446	3.1801	2.00345	2.36832	2.50759	2.28751	0.489953	0.0255968	0.237891	FALSE	FALSE
Zkscan7	6.20567	5.60746	5.87627	4.11018	4.15291	4.85481	4.36057	0.430762	0.0255961	0.237891	FALSE	FALSE
Kcnab2	6.09155	5.54488	4.59041	4.00691	4.63658	3.1928	3.54564	0.493538	0.0256485	0.238022	FALSE	FALSE
Sost	11.4983	11.4027	11.2271	12.1653	15.8945	11.6486	21.3024	-0.424027	0.0256932	0.238248	FALSE	FALSE
Krt15	4.89321	1.07643	2.69617	1.7143	2.08479	1.03511	1.34391	0.903399	0.0257258	0.238361	FALSE	FALSE
Prkcb	17.8324	17.1228	17.615	8.01381	13.8764	9.3014	18.5574	0.49309	0.0257495	0.238392	FALSE	FALSE
Htra1	3.90886	1.96511	1.65918	1.15663	1.66783	1.26837	1.95868	0.725831	0.0257881	0.238456	FALSE	FALSE
Slc20a1	84.3116	94.8887	95.1818	110.562	96.2673	103.015	100.179	-0.164098	0.0257972	0.238456	FALSE	FALSE
Meis1	111.888	110.046	124.591	88.6476	100.087	118.906	90.2423	0.215334	0.0258588	0.238836	FALSE	FALSE
Psmb5	123.8	133.903	129.79	144.62	140.148	137.057	152.048	-0.151471	0.0258847	0.238887	FALSE	FALSE
Erlin2	85.7096	83.9492	85.7245	73.3636	73.7516	80.5198	77.1034	0.159775	0.0259746	0.239528	FALSE	FALSE
Klk8	7.5324	7.47244	7.32806	5.51466	5.55389	6.72092	4.6608	0.407182	0.0260668	0.239999	FALSE	FALSE
Ntmt1	43.2685	48.2767	47.0517	53.5562	49.8349	53.7528	51.3689	-0.173909	0.0260615	0.239999	FALSE	FALSE
Bcat1	77.0217	128.871	124.978	165.192	112.112	146.942	130.074	-0.329203	0.0262298	0.240494	FALSE	FALSE
Clpp	50.0448	58.8032	58.7074	71.1742	58.6077	62.5002	63.364	-0.19384	0.0262734	0.240494	FALSE	FALSE
Espl1	147.923	150.826	159.351	137.226	137.196	142.874	135.106	0.144942	0.0262995	0.240494	FALSE	FALSE
Lonp1	167.667	167.936	163.651	198.9	196.337	170.472	180.813	-0.165146	0.0262819	0.240494	FALSE	FALSE
Lrfn4	94.1408	94.6885	96.2188	112.131	101.905	101.995	106.255	-0.151705	0.0262082	0.240494	FALSE	FALSE
Necab2	9.81495	13.3177	12.7066	17.7006	13.5595	14.5936	14.2683	-0.329573	0.0262966	0.240494	FALSE	FALSE
Polr3b	65.0526	61.0813	73.1423	85.0745	68.7481	76.4814	74.7158	-0.198837	0.0261509	0.240494	FALSE	FALSE
Slc2a13	4.49376	3.54221	3.49811	2.51981	2.70189	3.36775	1.84431	0.55881	0.0261789	0.240494	FALSE	FALSE
Zfp467	27.9184	18.8125	19.7443	14.9949	20.6645	12.6108	18.9291	0.398956	0.0263056	0.240494	FALSE	FALSE
Erc1	95.5959	86.8781	90.6052	69.4393	84.0254	81.9777	83.9945	0.188228	0.026406	0.241151	FALSE	FALSE
Psmc5	197.155	220.531	213.993	248.593	222.039	229.503	235.942	-0.152236	0.0264196	0.241151	FALSE	FALSE
Raph1	41.899	42.9071	50.5221	40.3376	37.9432	41.2294	38.0442	0.195696	0.0264537	0.241151	FALSE	FALSE
Uhrf2	162.475	156.984	164.854	147.822	152.09	142.568	138.795	0.151861	0.02646	0.241151	FALSE	FALSE
Bag1	141.39	146.044	143.741	161.887	155.676	157.074	159.997	-0.142531	0.0264829	0.241172	FALSE	FALSE
Tanc2	26.8199	26.3976	28.2338	19.8073	22.7659	27.1753	21.1881	0.254974	0.0265463	0.241561	FALSE	FALSE
8430427H17Rik	47.7766	49.0653	57.0621	60.7232	58.6577	70.5623	51.1687	-0.232636	0.0266369	0.242197	FALSE	FALSE
Rtn3	192.034	169.939	171.338	161.102	157.06	157.818	160.755	0.159282	0.026775	0.243264	FALSE	FALSE
Igsf10	26.3919	25.1209	26.4087	19.1877	23.0828	23.1369	22.8608	0.233839	0.0268254	0.243396	FALSE	FALSE
Rnf144a	145.898	134.629	140.229	120.827	129.441	123.47	130.502	0.153702	0.0268312	0.243396	FALSE	FALSE
Tk1	81.9577	88.1298	86.7615	102.961	93.3987	90.5939	95.5464	-0.159053	0.0268584	0.243454	FALSE	FALSE
Mfap3	82.186	79.7186	74.5803	69.8111	71.5501	66.6843	72.3854	0.16914	0.0269511	0.244104	FALSE	FALSE
Nsg1	45.2515	39.9532	40.7468	45.1293	43.9141	49.7435	58.6603	-0.234321	0.0269905	0.244273	FALSE	FALSE
Dmxl2	22.9824	26.8607	31.483	21.9554	21.4984	25.7757	21.3739	0.258877	0.0270649	0.244568	FALSE	FALSE
Lbx1	10.4141	12.0035	8.94576	12.8056	14.8771	10.7301	15.6694	-0.370762	0.0270558	0.244568	FALSE	FALSE
Dact2	4.55083	5.21944	4.03735	3.07747	3.13553	4.21333	2.23032	0.540509	0.0272052	0.244888	FALSE	FALSE
Fbxl20	53.4116	42.857	46.0562	37.4873	45.0315	38.5469	41.1037	0.226273	0.0271815	0.244888	FALSE	FALSE
Hook1	22.9539	20.9654	20.5739	15.6972	17.5623	18.1946	20.1301	0.263032	0.0271242	0.244888	FALSE	FALSE
Mrpl37	74.8675	84.3998	81.0373	104.696	84.0755	85.5641	90.4853	-0.186685	0.0271999	0.244888	FALSE	FALSE
Senp2	121.902	122.801	119.074	133.447	133.343	131.255	138.023	-0.144337	0.0271893	0.244888	FALSE	FALSE
Prmt6	50.9008	51.0805	49.416	60.3101	52.9204	60.6486	54.8859	-0.180251	0.0274031	0.24648	FALSE	FALSE
Vasp	100.903	109.934	106.146	122.355	115.014	115.203	116.048	-0.148694	0.0274386	0.24661	FALSE	FALSE
Cnih4	47.4912	45.4229	42.959	50.7679	55.1386	48.0378	52.6842	-0.189727	0.0275214	0.246785	FALSE	FALSE
Fam89b	73.4695	71.2072	73.0594	84.7027	89.2958	72.2389	84.0374	-0.185836	0.0274973	0.246785	FALSE	FALSE
Sigmar1	49.8879	60.881	58.7074	68.7164	60.8426	63.856	63.5356	-0.184832	0.0275052	0.246785	FALSE	FALSE
Brca2	79.7037	81.934	92.5548	64.6062	76.3367	83.8147	69.1114	0.205342	0.0277137	0.247095	FALSE	FALSE
Dnaja2	252.022	286.706	285.573	325.138	287.434	306.232	305.068	-0.155057	0.027689	0.247095	FALSE	FALSE
Ephb1	2.82465	1.90253	1.67301	1.7556	4.83672	3.64475	3.76009	-0.716968	0.0276401	0.247095	FALSE	FALSE
Pitpnm1	11.1417	10.8144	12.278	9.74876	8.43924	9.70961	8.57816	0.323923	0.0276252	0.247095	FALSE	FALSE
Satb1	41.8705	46.4243	51.1858	38.9124	39.1607	45.9384	35.9568	0.217162	0.0277093	0.247095	FALSE	FALSE
Sp1	165.699	162.241	173.094	146.562	153.257	159.582	140.525	0.155093	0.0277203	0.247095	FALSE	FALSE
U2af1	182.604	211.344	201.563	234.735	217.469	213.116	218.643	-0.154606	0.027593	0.247095	FALSE	FALSE
Wdr12	47.7052	59.3289	60.8506	72.3928	58.7411	69.7313	59.9042	-0.219779	0.0277251	0.247095	FALSE	FALSE
Eif4a1	1530.66	1725.17	1727.02	1940.27	1742.49	1821	1870.37	-0.150448	0.0278783	0.247956	FALSE	FALSE
Jade2	4.83615	5.40719	5.83479	3.51121	3.70259	4.19875	4.36057	0.440477	0.0278852	0.247956	FALSE	FALSE
Npm3	63.9826	87.9796	78.4932	96.1864	84.2089	89.3984	85.2098	-0.207848	0.0278594	0.247956	FALSE	FALSE
Pinx1	28.2893	33.6698	32.9348	40.193	34.6909	37.5118	33.9695	-0.209197	0.0279134	0.248018	FALSE	FALSE
BC052040	30.8857	31.2165	33.5155	27.47	26.7187	30.3972	25.8489	0.207012	0.0279439	0.2481	FALSE	FALSE
Hltf	37.662	35.1843	37.3455	28.5854	32.5895	32.7007	33.8266	0.201175	0.0281428	0.249676	FALSE	FALSE
Alg10b	138.807	133.265	129.679	114.796	120.051	127.522	120.066	0.150755	0.028177	0.24979	FALSE	FALSE
Lars	116.909	148.685	148.234	160.793	148.654	169.831	149.117	-0.187481	0.0282577	0.250316	FALSE	FALSE
Aldh6a1	22.5116	16.4344	16.8269	13.136	15.4608	14.6373	16.3986	0.317184	0.0284168	0.251088	FALSE	FALSE
Arap1	29.0454	22.3547	23.5189	18.8366	20.7979	22.0434	21.4883	0.263194	0.0284191	0.251088	FALSE	FALSE
Cyp39a1	22.5259	16.2716	16.7024	12.0414	18.4629	12.7129	13.868	0.373766	0.0284308	0.251088	FALSE	FALSE
Ermp1	65.2808	74.011	72.6999	64.0899	61.4597	62.6605	64.2933	0.16292	0.0283843	0.251088	FALSE	FALSE
Chordc1	127.437	140.7	143.575	131.051	118.033	121.02	124.483	0.1507	0.0285055	0.251559	FALSE	FALSE
Kcna6	14.0947	11.6029	11.1027	9.31503	10.0737	9.43261	10.1651	0.331046	0.0285658	0.251853	FALSE	FALSE
Rps6kl1	0.171191	0.963782	1.00934	0.84682	1.40098	2.18685	1.32962	-1.01046	0.028582	0.251853	FALSE	FALSE
Nop56	214.845	251.51	267.211	302.645	250.308	287.746	268.897	-0.181884	0.0286109	0.251918	FALSE	FALSE
Adamts3	14.0662	16.8099	17.1034	10.9054	12.6255	13.2523	14.9689	0.304255	0.0286467	0.251986	FALSE	FALSE
Pcdhga12	6.63365	4.41838	4.9499	3.22205	4.0028	3.60101	4.30338	0.49326	0.0286618	0.251986	FALSE	FALSE
Gli2	113.471	113.363	125.033	110.107	103.689	106.018	102.581	0.151638	0.028747	0.252356	FALSE	FALSE
Pdap1	272.522	294.529	301.515	312.704	323.259	315.752	326.985	-0.142946	0.0287436	0.252356	FALSE	FALSE
Epb4.1l2	174.33	140.562	139.482	120.662	140.198	120.816	141.139	0.21243	0.0287832	0.252485	FALSE	FALSE
Apaf1	76.9361	69.9556	68.5243	58.3067	67.9475	66.072	59.1178	0.191628	0.0288375	0.252637	FALSE	FALSE
Fnip1	31.8273	29.7145	31.3447	23.7936	27.8528	27.1898	27.8933	0.213518	0.0288438	0.252637	FALSE	FALSE
Zwilch	45.0946	39.6152	38.341	36.9916	35.1079	37.2493	33.0116	0.204905	0.0289805	0.253644	FALSE	FALSE
Gm3002	20.7712	17.1353	23.7678	17.5354	17.2287	18.0925	12.4812	0.332192	0.0291073	0.254564	FALSE	FALSE
Gbx2	6.86191	10.4264	12.8587	14.2101	11.3579	12.917	15.0261	-0.412388	0.0291718	0.254746	FALSE	FALSE
Ptrf	24.7371	24.3449	25.9247	31.3324	28.3532	28.881	27.0355	-0.20829	0.0291654	0.254746	FALSE	FALSE
Acss3	1.9687	0.838616	0.788112	0.371775	0.767203	0.845582	0.729144	0.806448	0.0293349	0.254839	FALSE	FALSE
Dopey1	17.6184	17.298	17.1449	14.4786	14.8938	15.0601	13.7965	0.253524	0.0292269	0.254839	FALSE	FALSE
Heca	28.6317	26.7982	25.98	21.7075	25.2176	23.341	22.8179	0.221212	0.0292979	0.254839	FALSE	FALSE
Nmi	1.14127	1.06392	1.13378	1.7143	1.55109	1.37043	2.11595	-0.601061	0.0293137	0.254839	FALSE	FALSE
Plin3	76.7934	67.7151	67.5426	57.4186	65.9795	57.7037	65.7945	0.195187	0.0293245	0.254839	FALSE	FALSE
Tmem181b-ps	8.13157	7.50999	7.10684	11.6696	12.0084	8.51413	8.13496	-0.409178	0.0293325	0.254839	FALSE	FALSE
Zmiz2	129.206	138.997	145.262	124.297	128.607	116.792	126.957	0.150654	0.0292703	0.254839	FALSE	FALSE
Dut	192.861	224.949	221.086	264.538	233.247	223.438	235.699	-0.167542	0.0294489	0.255449	FALSE	FALSE
Pabpn1	343.381	384.299	375.363	435.039	391.424	392.51	414.054	-0.150924	0.0294409	0.255449	FALSE	FALSE
Haus8	34.1954	34.2205	33.239	30.8367	31.8556	25.1342	28.5367	0.220902	0.0297377	0.257764	FALSE	FALSE
Pmpcb	73.5408	80.9452	81.1617	87.8834	86.8941	84.9081	89.7991	-0.153438	0.0298249	0.258288	FALSE	FALSE
Rsl24d1	115.368	131.262	127.937	151.271	130.191	142.772	133.734	-0.159605	0.0298518	0.258288	FALSE	FALSE
Zfp41	122.245	112.863	117.138	97.3844	108.876	103.219	110.315	0.161594	0.0298645	0.258288	FALSE	FALSE
Apopt1	25.0224	27.1862	26.7682	31.6628	30.2045	28.4145	30.7813	-0.200581	0.0299635	0.258571	FALSE	FALSE
Ctse	2.12562	0.0125167	0.0414796	2.747	3.81934	3.87801	3.91736	-2.30417	0.0299307	0.258571	FALSE	FALSE
Rybp	116.467	108.645	106.506	124.193	126.055	118.556	123.24	-0.1542	0.0299491	0.258571	FALSE	FALSE
Parl	63.6117	76.9649	75.4099	89.102	71.967	84.2229	83.5942	-0.191291	0.03011	0.259452	FALSE	FALSE
Wwc1	21.3561	24.2823	23.5466	26.8711	25.2677	26.1839	28.5081	-0.211636	0.0301089	0.259452	FALSE	FALSE
Pramef8	19.8724	19.4759	18.97	16.2548	16.5282	16.4597	16.7989	0.235358	0.0303505	0.261332	FALSE	FALSE
Fam46a	7.5752	5.33209	3.87143	6.13429	8.18906	7.85808	10.065	-0.529113	0.0304547	0.261762	FALSE	FALSE
Stxbp6	25.3363	24.0695	28.7454	23.6284	22.1655	23.0494	19.8299	0.233332	0.0304677	0.261762	FALSE	FALSE
Timm10	15.8637	16.1965	18.1681	21.4184	18.2127	20.0607	19.7584	-0.24603	0.0304235	0.261762	FALSE	FALSE
0610009O20Rik	51.2146	50.5798	51.6006	46.4925	45.4985	45.8801	44.6064	0.164723	0.0305987	0.261835	FALSE	FALSE
Foxo3	27.6473	25.6466	28.1232	20.9227	23.9001	26.0089	21.5884	0.231225	0.030601	0.261835	FALSE	FALSE
Kcmf1	106.623	118.057	114.691	132.393	123.136	121.428	124.155	-0.1469	0.0306105	0.261835	FALSE	FALSE
Lrrc17	5.96315	5.49481	5.01903	6.34083	8.10567	6.72092	7.80613	-0.400187	0.0305136	0.261835	FALSE	FALSE
Sel1l3	5.42105	8.33609	7.20362	8.28232	9.54001	10.2053	8.74973	-0.395836	0.0305725	0.261835	FALSE	FALSE
Srbd1	60.2878	59.9422	61.2515	53.6388	53.8543	53.7236	55.4006	0.159576	0.030527	0.261835	FALSE	FALSE
Zfp516	224.774	219.492	225.552	186.486	212.649	209.748	193.852	0.153743	0.0307537	0.262867	FALSE	FALSE
Edn3	15.0933	10.4639	10.5358	8.1997	9.20644	9.24308	10.3653	0.377053	0.0308591	0.263314	FALSE	FALSE
Noc4l	49.2745	60.5305	59.7997	69.9969	59.3749	64.8474	63.8215	-0.18987	0.0308575	0.263314	FALSE	FALSE
Pnisr	79.1045	75.7883	81.5489	93.4394	87.2277	84.2083	86.9111	-0.157907	0.0308735	0.263314	FALSE	FALSE
Snrnp200	336.191	365.937	397.955	298.163	329.114	365.146	305.526	0.176334	0.0309308	0.263421	FALSE	FALSE
Tmem231	27.0624	22.192	19.1774	18.4442	20.1141	16.7513	19.3438	0.289414	0.0309311	0.263421	FALSE	FALSE
Akr1a1	418.063	412.574	412.832	456.436	466.96	432.778	477.732	-0.145514	0.0310092	0.263894	FALSE	FALSE
S100a11	25.2079	30.4029	27.2383	33.1293	31.5387	29.2309	34.2412	-0.213526	0.0310418	0.263979	FALSE	FALSE
Fgf18	2.19695	1.03888	0.884898	0.516354	1.16748	0.801845	0.671956	0.79196	0.031136	0.264588	FALSE	FALSE
Rpl7a	1109.5	1246.73	1249.49	1379.39	1291.09	1296.06	1346.09	-0.144074	0.0311744	0.264694	FALSE	FALSE
Sgms2	1.74044	1.7273	1.20291	1.63168	2.45172	2.71169	2.57345	-0.592644	0.0311937	0.264694	FALSE	FALSE
Tet1	51.3716	48.2517	55.7209	39.1396	46.9495	50.5162	42.1474	0.211809	0.0312169	0.264698	FALSE	FALSE
Ssbp1	65.4092	73.285	68.3307	85.7354	72.6175	77.8081	74.9874	-0.172186	0.0312532	0.264814	FALSE	FALSE
Rpl28	646.802	714.526	698.848	790.703	754.561	715.945	782.414	-0.147944	0.0313091	0.265096	FALSE	FALSE
Psmd3	262.208	303.253	284.785	333.709	301.444	310.139	313.246	-0.150625	0.0313684	0.265406	FALSE	FALSE
Gpm6a	2.61066	3.02903	2.5026	1.73495	2.13483	2.04106	1.74423	0.503217	0.0314001	0.265482	FALSE	FALSE
Atrnl1	78.0774	67.3646	68.3307	59.3807	68.2811	63.0979	58.5317	0.193105	0.0317758	0.266439	FALSE	FALSE
Cdk9	101.901	112.863	107.017	123.223	115.114	116.938	119.651	-0.146344	0.0315778	0.266439	FALSE	FALSE
Cep76	40.3868	39.0895	38.9632	42.6921	45.0649	45.8509	44.5779	-0.17458	0.0315574	0.266439	FALSE	FALSE
Dnajb14	8.71648	9.61279	10.1763	6.91914	8.17238	7.61024	7.34863	0.338313	0.0317052	0.266439	FALSE	FALSE
Loxl1	10.4284	5.41971	5.01903	3.82102	5.12025	4.94228	4.87526	0.566694	0.0318095	0.266439	FALSE	FALSE
Nubp1	36.5493	41.8056	39.6683	46.5545	42.7299	44.3056	44.3634	-0.176846	0.0317594	0.266439	FALSE	FALSE
Prrc2c	464.484	486.785	580.507	388.009	441.876	525.515	399.156	0.219071	0.0316479	0.266439	FALSE	FALSE
Rpl30	1.74044	2.7787	2.0325	3.11878	3.26895	3.16364	2.95947	-0.515495	0.0318055	0.266439	FALSE	FALSE
Sptbn2	66.2509	62.9588	76.7372	75.2638	75.7697	76.0149	84.2805	-0.181459	0.0316737	0.266439	FALSE	FALSE
Srcin1	2.61066	3.04155	2.73765	2.08607	2.13483	1.95359	1.80141	0.490081	0.0317419	0.266439	FALSE	FALSE
Srcrb4d	4.36537	3.32943	3.77464	2.2513	3.13553	2.82833	2.67353	0.486929	0.0318025	0.266439	FALSE	FALSE
Wdr77	113.485	134.604	136.343	163.085	129.824	153.925	137.308	-0.188285	0.0315862	0.266439	FALSE	FALSE
Zdhhc21	40.9432	43.946	47.5633	38.045	39.4776	42.075	34.5557	0.196183	0.0318077	0.266439	FALSE	FALSE
Igf2bp1	656.132	538.003	660.383	603.515	535.775	522.132	507.47	0.18917	0.0319529	0.266875	FALSE	FALSE
Psmb6	225.173	246.553	234.373	271.313	253.127	248.076	268.468	-0.14485	0.031939	0.266875	FALSE	FALSE
Rps21	362.711	433.314	412.321	459.018	452.033	429.395	451.84	-0.153657	0.0318983	0.266875	FALSE	FALSE
Sorbs3	37.5764	30.7409	29.9068	29.0191	28.7868	25.2217	28.3079	0.234462	0.0319374	0.266875	FALSE	FALSE
Glg1	165.185	163.818	173.882	142.204	158.544	158.051	144.728	0.151699	0.0320121	0.267178	FALSE	FALSE
Brpf1	75.8376	74.2988	74.1102	85.1364	84.7927	78.8141	84.3233	-0.155533	0.0322016	0.267614	FALSE	FALSE
Lgalsl	33.2111	36.7489	38.7972	42.5889	38.8772	43.183	40.1315	-0.184135	0.0321469	0.267614	FALSE	FALSE
Msantd2	36.264	36.6613	35.1332	43.5183	40.0113	39.13	40.4603	-0.178458	0.0321872	0.267614	FALSE	FALSE
Polr2h	44.3813	50.3169	50.1212	58.286	50.8189	55.4439	53.542	-0.175129	0.0321011	0.267614	FALSE	FALSE
Tomm70a	230.066	273.401	271.124	310.391	267.02	308.798	275.531	-0.16963	0.0321967	0.267614	FALSE	FALSE
Trrap	291.196	297.608	332.417	234.032	284.449	304.249	253.456	0.190591	0.0321282	0.267614	FALSE	FALSE
Mrps30	60.9155	69.1295	67.4043	81.1915	70.2158	71.2621	73.8294	-0.17093	0.0322508	0.267833	FALSE	FALSE
Grwd1	74.5537	92.7359	90.8541	111.78	87.8281	99.9682	95.0175	-0.196713	0.0322816	0.267898	FALSE	FALSE
Cdk1	191.306	183.957	188.456	207.244	204.476	200.52	217.771	-0.143165	0.0323153	0.267987	FALSE	FALSE
Zhx2	16.5627	15.8336	17.0481	14.2101	14.6102	13.471	12.7672	0.260446	0.032349	0.268078	FALSE	FALSE
Mmrn1	16.2203	19.0128	21.3205	16.4201	13.9764	17.801	13.1532	0.298064	0.0323771	0.26812	FALSE	FALSE
Lphn2	271.209	294.955	307.087	270.9	246.723	281.316	247.737	0.153744	0.0324003	0.268122	FALSE	FALSE
Mrps26	37.5622	42.7819	43.4291	48.7438	43.9808	47.1922	46.7796	-0.177571	0.032548	0.268796	FALSE	FALSE
Shprh	58.0908	60.3052	64.5284	51.0571	54.1379	59.5844	50.6112	0.179009	0.0325055	0.268796	FALSE	FALSE
Smn1	53.9965	62.2078	62.6342	70.9677	62.1602	67.8069	67.6817	-0.17151	0.0325506	0.268796	FALSE	FALSE
Atp5d	149.878	156.371	153.461	169.467	167.167	163.066	175.767	-0.1401	0.0325795	0.268844	FALSE	FALSE
Acad11	18.6884	17.1103	16.9513	13.735	14.6436	14.9726	15.5408	0.255087	0.0326947	0.269604	FALSE	FALSE
Zfp692	10.6138	12.1662	12.2088	18.9812	12.5921	14.025	13.339	-0.335216	0.032778	0.270101	FALSE	FALSE
Rpl15	936.672	999.229	1014.09	1080.38	1057.22	1070.03	1112.29	-0.135252	0.0328446	0.270269	FALSE	FALSE
Ypel2	10.5853	7.69774	7.0377	5.39074	7.67203	5.62749	6.20487	0.438504	0.0328322	0.270269	FALSE	FALSE
Mthfd2l	18.1462	27.4991	28.6209	30.4442	28.5366	30.0182	31.0101	-0.276957	0.0329015	0.270547	FALSE	FALSE
Iscu	37.2198	41.6054	37.3593	45.0467	42.7299	42.3083	45.164	-0.177534	0.0329597	0.270834	FALSE	FALSE
Gtpbp4	140.534	161.49	159.392	190.514	157.36	179.992	163.943	-0.169027	0.033082	0.270894	FALSE	FALSE
Ifrd2	52.7126	69.1921	66.7407	82.0383	65.5959	77.4145	67.5673	-0.217795	0.0330828	0.270894	FALSE	FALSE
Rbm28	84.8394	92.4981	99.468	112.152	95.1332	108.118	99.1636	-0.167419	0.0330273	0.270894	FALSE	FALSE
Rwdd4a	55.6656	58.1899	54.836	65.3498	59.625	63.7685	62.6778	-0.16042	0.0330718	0.270894	FALSE	FALSE
Szt2	51.5142	50.0165	54.7254	42.9193	48.1504	48.6793	44.4778	0.176972	0.0330288	0.270894	FALSE	FALSE
Hipk2	74.3397	78.4794	79.9312	64.916	71.8669	75.49	61.6198	0.18008	0.0332033	0.271441	FALSE	FALSE
Madd	21.3133	19.9015	20.5877	17.3288	18.6797	16.4014	17.5995	0.235152	0.0332192	0.271441	FALSE	FALSE
Rpl23a	898.211	936.033	978.13	1070.34	1013.79	993.398	1049.81	-0.138365	0.0331907	0.271441	FALSE	FALSE
Myg1	53.7254	49.8663	51.0752	64.8954	57.6904	52.7177	59.6754	-0.187843	0.0332911	0.271526	FALSE	FALSE
Rpl24	533.759	565.089	567.178	620.988	601.988	608.586	608.149	-0.135235	0.0332898	0.271526	FALSE	FALSE
Slitrk5	8.63088	8.69907	11.158	8.13774	6.15431	7.78518	7.37722	0.367226	0.0332993	0.271526	FALSE	FALSE
Cep85l	12.126	12.2788	14.1998	11.0913	9.95697	11.0946	9.69332	0.299516	0.0333977	0.272139	FALSE	FALSE
Brip1	27.6473	27.7369	30.2801	23.1533	26.0015	25.5716	24.5621	0.201461	0.0334401	0.272295	FALSE	FALSE
Crebbp	85.2817	81.7588	91.6284	69.2121	78.2214	85.1559	71.0987	0.183145	0.0334839	0.272461	FALSE	FALSE
Dnajc8	166.74	173.543	174.463	192.951	184.913	185.591	190.735	-0.135948	0.0336674	0.273328	FALSE	FALSE
Pcdhga11	9.82922	9.62531	9.20847	8.07578	7.30511	7.36239	7.76324	0.325645	0.0336839	0.273328	FALSE	FALSE
Polr2d	87.607	95.6523	92.1262	106.596	102.021	97.8542	100.121	-0.146715	0.0336757	0.273328	FALSE	FALSE
Tfb1m	15.1219	12.6919	13.6744	10.9674	9.84022	12.1006	12.0237	0.298822	0.033618	0.273328	FALSE	FALSE
Fam171b	22.155	20.6274	18.4031	16.2755	18.9299	14.0833	17.8855	0.28035	0.0338355	0.273609	FALSE	FALSE
Megf6	156.982	148.523	142.496	114.011	140.065	110.48	149.875	0.215371	0.0337947	0.273609	FALSE	FALSE
Nit1	19.2733	21.1782	21.1961	18.4029	16.4115	18.1946	17.0848	0.230297	0.0338259	0.273609	FALSE	FALSE
Scly	12.7109	13.1425	12.6651	13.8383	15.6443	15.5412	16.8275	-0.269208	0.0337458	0.273609	FALSE	FALSE
Tmem160	23.553	27.4365	24.9016	29.68	28.2698	27.4814	31.4247	-0.207321	0.0338055	0.273609	FALSE	FALSE
Actr1b	145.113	151.527	145.123	167.918	161.179	156.549	163.471	-0.140009	0.033912	0.273659	FALSE	FALSE
Aldoa	485.683	525.374	533.911	579.845	616.681	580.667	520.48	-0.157514	0.0339016	0.273659	FALSE	FALSE
Nrarp	24.5231	17.5984	17.8915	21.6249	30.0043	20.1919	30.8671	-0.360518	0.0338982	0.273659	FALSE	FALSE
Tmem106c	18.9309	16.8975	16.0664	12.3718	14.8938	14.4186	15.3835	0.2765	0.0340028	0.274203	FALSE	FALSE
Sox4	265.36	223.447	221.114	244.649	283.999	272.496	273.729	-0.183532	0.0340344	0.274269	FALSE	FALSE
Spon1	2.63919	6.63383	5.22643	8.86063	6.70469	12.3776	4.08892	-0.727298	0.034141	0.274676	FALSE	FALSE
St6gal1	94.5545	81.6336	85.2544	75.2431	81.3402	75.1839	78.0756	0.169805	0.034149	0.274676	FALSE	FALSE
Zfr	177.982	175.571	180.464	159.429	162.981	168.577	155.208	0.139908	0.0341554	0.274676	FALSE	FALSE
Gm7120	7.00457	11.5654	13.2043	24.0414	16.2614	8.33919	15.0118	-0.585883	0.03427	0.275408	FALSE	FALSE
Cep128	32.8401	26.7606	27.736	22.5543	25.3511	25.382	26.0776	0.227813	0.0344063	0.275557	FALSE	FALSE
Fbl	253.192	312.841	307.64	366.198	308.849	325.01	315.448	-0.175255	0.0344055	0.275557	FALSE	FALSE
Klhl7	77.2071	74.762	82.5167	68.8403	70.2325	70.9997	71.0844	0.152933	0.0343583	0.275557	FALSE	FALSE
Prss23	12.283	13.8685	11.5452	7.35288	10.3572	11.634	9.8077	0.358488	0.0343788	0.275557	FALSE	FALSE
Rai14	194.23	183.056	181.432	166.411	168.835	169.729	170.462	0.141256	0.0344014	0.275557	FALSE	FALSE
Ndufa12	71.8574	78.2666	77.788	85.1777	81.7238	82.0798	88.398	-0.150776	0.0344581	0.275783	FALSE	FALSE
Cars	62.8556	80.3569	73.1009	87.7182	76.7037	86.7013	77.4179	-0.187498	0.0345796	0.275842	FALSE	FALSE
Lpar1	224.988	186.961	184.017	157.736	183.312	139.871	195.168	0.23297	0.0345334	0.275842	FALSE	FALSE
Mgat5	25.2221	26.0096	25.7312	18.4235	24.0502	23.1077	21.5312	0.235236	0.0346044	0.275842	FALSE	FALSE
Pnpla8	50.0876	46.8623	48.379	40.5028	44.6145	44.4659	42.1474	0.173728	0.0345373	0.275842	FALSE	FALSE
Ppp2cb	125.811	129.823	129.568	144.765	140.215	140.702	138.809	-0.136158	0.0346159	0.275842	FALSE	FALSE
Prkacb	126.61	132.589	133.108	112.214	123.42	115.699	122.396	0.142798	0.0346307	0.275842	FALSE	FALSE
Tbl3	93.3562	116.58	116.309	135.409	119.183	118.848	118.808	-0.17799	0.034598	0.275842	FALSE	FALSE
Skida1	43.7393	37.1119	37.6358	30.816	35.6082	34.4939	35.8853	0.206772	0.0346988	0.276197	FALSE	FALSE
Apcdd1	60.4304	82.5598	78.2581	100.359	74.7857	84.8352	85.4957	-0.227399	0.0347944	0.276581	FALSE	FALSE
Hmbs	63.8685	65.1367	66.1738	65.9694	69.2818	84.704	76.4743	-0.188446	0.0347799	0.276581	FALSE	FALSE
Vangl1	13.8237	14.2064	15.0018	16.3168	17.0619	18.0488	16.6702	-0.247578	0.0348844	0.277108	FALSE	FALSE
Ormdl1	49.6739	47.7135	45.4478	38.3961	43.5471	40.6025	44.9067	0.185025	0.0349658	0.277566	FALSE	FALSE
Fau	501.247	542.484	537.244	577.325	578.655	565.49	595.553	-0.136409	0.0350693	0.278199	FALSE	FALSE
Dnajc19	21.2134	24.5952	22.952	25.9829	25.251	27.6855	26.8211	-0.205825	0.0351046	0.278248	FALSE	FALSE
Taf9	87.4501	90.6706	93.9513	107.071	99.0526	97.169	98.4487	-0.14688	0.0351231	0.278248	FALSE	FALSE
Fam124b	1.89737	1.92756	2.18459	1.79691	1.31759	1.25379	1.10086	0.558316	0.0351814	0.278375	FALSE	FALSE
Gpx1	187.911	190.841	186.921	200.614	201.891	212.168	215.441	-0.138422	0.0351867	0.278375	FALSE	FALSE
Cox5b	115.654	130.549	125.78	138.176	136.412	132.1	140.453	-0.141503	0.0352887	0.278458	FALSE	FALSE
Myh10	653.593	644.708	699.664	532.299	619.55	663.169	543.126	0.175863	0.0352924	0.278458	FALSE	FALSE
Prmt2	29.345	27.1737	25.3579	22.2858	25.6513	21.956	23.6614	0.222454	0.035268	0.278458	FALSE	FALSE
Sde2	71.5578	73.5353	71.2066	80.5719	79.1721	78.5954	81.1065	-0.147414	0.0352394	0.278458	FALSE	FALSE
Uggt2	31.6418	32.9563	26.9756	27.3461	24.8674	28.6623	23.1753	0.231215	0.0353306	0.278571	FALSE	FALSE
Fam19a5	8.2885	11.7782	11.5728	12.9088	13.5928	14.025	12.2239	-0.321839	0.0354176	0.278931	FALSE	FALSE
Pdk2	11.4841	7.38483	7.74286	6.15494	7.65536	5.16097	7.07698	0.445315	0.035424	0.278931	FALSE	FALSE
Agrn	245.131	232.171	241.411	201.667	219.237	226.864	218.557	0.145355	0.0355139	0.279076	FALSE	FALSE
Ankhd1	127.88	126.381	141.224	109.033	121.702	128.747	111.845	0.161668	0.0355083	0.279076	FALSE	FALSE
Wls	143.273	129.022	135.058	116.799	120.885	125.642	126.385	0.149084	0.0354838	0.279076	FALSE	FALSE
Gpsm1	93.5416	92.5606	93.3844	107.071	102.171	98.8019	103.295	-0.142307	0.0355982	0.279549	FALSE	FALSE
Akt2	135.013	144.029	141.459	164.201	150.839	149.391	153.964	-0.141125	0.0358562	0.281198	FALSE	FALSE
Ckb	12.5112	8.72411	9.08403	10.2445	14.6936	14.5644	13.0531	-0.380146	0.0358511	0.281198	FALSE	FALSE
Acsl1	11.5411	12.2413	12.5407	14.4579	13.6262	16.4743	13.9681	-0.273391	0.0359933	0.282084	FALSE	FALSE
Ppp1r9a	79.504	75.0749	82.7103	72.3928	67.614	74.5424	69.2973	0.156509	0.0360607	0.282423	FALSE	FALSE
Aff4	215.444	197.287	209.389	166.576	197.055	189.454	189.02	0.160372	0.0361323	0.282795	FALSE	FALSE
Iqcc	12.5683	14.7947	12.5545	10.926	11.0411	10.9634	10.88	0.281168	0.0362103	0.283215	FALSE	FALSE
3110082I17Rik	29.3165	38.4762	34.9535	45.0054	36.2921	40.69	37.5724	-0.219004	0.0362933	0.283485	FALSE	FALSE
Tsc2	105.796	104.752	107.46	92.7991	98.1186	98.7436	95.1747	0.139664	0.0362835	0.283485	FALSE	FALSE
Megf10	1.09848	1.45193	0.746633	1.01205	2.15151	3.79054	1.14376	-0.882493	0.0364642	0.28426	FALSE	FALSE
Rnf220	116.396	115.128	112.299	136.586	125.555	116.297	131.432	-0.153169	0.0364654	0.28426	FALSE	FALSE
Zfp62	70.4023	60.3052	61.7216	52.5442	62.1602	57.31	51.8836	0.19629	0.0364643	0.28426	FALSE	FALSE
Herc2	116.567	124.516	149.423	95.2776	112.479	130.949	110.887	0.211412	0.0365871	0.284376	FALSE	FALSE
Mrpl18	76.5652	77.7785	78.7283	86.1485	84.0755	84.0917	89.313	-0.145064	0.0365909	0.284376	FALSE	FALSE
Rpl35	562.919	617.296	613.096	656.451	641.866	657.148	671.87	-0.13593	0.0366018	0.284376	FALSE	FALSE
Zfp335	44.5667	42.3814	43.1111	49.9831	50.1684	46.2592	48.5667	-0.168881	0.0365748	0.284376	FALSE	FALSE
Zfp952	16.8053	12.8671	13.4809	12.3305	11.5414	10.9488	11.8951	0.300674	0.0365855	0.284376	FALSE	FALSE
Celf2	19.1163	17.4482	20.726	14.0861	16.2447	17.9905	15.3835	0.260575	0.0366824	0.284812	FALSE	FALSE
Pcdhgb7	9.5867	7.89801	7.21745	4.99831	7.25508	6.35644	6.34784	0.398248	0.0367593	0.28522	FALSE	FALSE
Dgcr8	81.33	82.8477	77.2073	93.6046	93.1819	89.0194	83.2368	-0.157424	0.0369325	0.285428	FALSE	FALSE
Naga	10.1716	10.7143	10.0242	6.07232	7.45522	8.57245	9.73621	0.369728	0.0368261	0.285428	FALSE	FALSE
Nedd8	130.162	133.803	131.601	146.748	144.067	139.827	148.974	-0.136074	0.036915	0.285428	FALSE	FALSE
Prpf8	594.946	659.527	737.355	553.387	579.872	663.126	556.079	0.174923	0.0368905	0.285428	FALSE	FALSE
Rpl31	519.522	580.785	572.46	615.06	613.846	613.003	610.365	-0.136821	0.0368924	0.285428	FALSE	FALSE
Sipa1l2	56.7213	53.4711	49.3192	62.4169	65.5125	56.5665	57.6167	-0.18666	0.0369285	0.285428	FALSE	FALSE
Ifit2	17.5899	13.7433	12.2088	10.5543	12.2085	12.6254	10.8371	0.327875	0.0370236	0.285942	FALSE	FALSE
Aven	31.9985	36.461	34.9535	42.1345	37.5263	38.2261	38.4159	-0.180043	0.0370758	0.286157	FALSE	FALSE
Pepd	38.2897	44.9974	41.2169	51.4495	45.2483	43.6204	48.6239	-0.185933	0.0371219	0.286324	FALSE	FALSE
Ccdc137	33.0541	35.2594	35.1609	45.9348	38.2935	39.2175	35.3992	-0.20215	0.0371722	0.286523	FALSE	FALSE
1600014C10Rik	13.5098	12.7795	11.8355	10.9467	10.0404	9.69503	10.8371	0.29241	0.0372327	0.28672	FALSE	FALSE
Dtx3l	11.7694	8.29854	8.42036	7.31157	8.05564	7.24576	6.50511	0.383401	0.0372658	0.28672	FALSE	FALSE
Slc8a2	5.83476	5.78269	5.55826	2.78831	5.12025	4.88396	3.38837	0.498646	0.0372714	0.28672	FALSE	FALSE
Hsph1	325.22	419.245	419.925	378.921	334.818	323.887	329.316	0.183797	0.0374061	0.287567	FALSE	FALSE
Rps19	497.31	543.523	540.175	595.088	570.366	568.552	581.07	-0.135134	0.0375252	0.288293	FALSE	FALSE
Xylb	17.4472	17.6485	15.6516	14.933	14.0765	12.5963	14.8831	0.26109	0.0375584	0.288359	FALSE	FALSE
Ccpg1	16.1918	15.0325	15.3889	11.8761	13.9598	13.1794	12.7958	0.26165	0.0376148	0.288577	FALSE	FALSE
Cog6	54.1249	47.1878	43.6227	39.3875	43.8807	38.8968	45.1926	0.20712	0.0376949	0.288577	FALSE	FALSE
Lrrc61	19.0878	18.4621	19.1083	16.0689	15.8277	15.5412	16.9848	0.229497	0.0377349	0.288577	FALSE	FALSE
Ppm1l	22.212	23.0432	26.1874	18.5887	21.0647	22.5246	18.8005	0.233594	0.0377326	0.288577	FALSE	FALSE
Slc25a23	21.3133	18.7249	17.9745	15.2221	16.5949	17.4511	15.7266	0.250286	0.0376646	0.288577	FALSE	FALSE
Tma16	22.0979	27.6493	27.1276	30.1964	26.9355	32.3945	29.7519	-0.218526	0.037733	0.288577	FALSE	FALSE
Zbtb38	7.37548	7.82291	8.30974	5.80382	7.03826	6.34186	5.06112	0.37076	0.0378064	0.288935	FALSE	FALSE
Caskin1	5.86329	5.24448	5.57209	3.80037	4.87007	3.87801	4.07463	0.419185	0.0378602	0.289135	FALSE	FALSE
Riok1	49.2032	48.0639	47.4112	54.0313	50.5854	57.8203	53.8709	-0.1654	0.0378821	0.289135	FALSE	FALSE
Gys1	71.0585	63.7723	66.5333	58.2241	64.2283	57.1934	59.0464	0.169589	0.0381017	0.290622	FALSE	FALSE
Dse	76.1943	69.4549	75.9215	62.6647	67.0302	70.4603	63.3497	0.164599	0.0381622	0.290796	FALSE	FALSE
Vezt	31.6989	31.3041	27.8605	25.3633	29.3539	25.3529	24.1189	0.217831	0.0381743	0.290796	FALSE	FALSE
Arnt	72.8418	67.8152	66.6577	58.947	64.9454	60.6632	62.2346	0.163324	0.0382067	0.290806	FALSE	FALSE
Dmxl1	67.6918	70.0432	77.4286	59.422	63.1942	71.5246	59.1178	0.179524	0.0382502	0.290806	FALSE	FALSE
Zfp87	16.3202	14.6695	14.905	11.525	14.2433	12.2464	12.4955	0.276098	0.0382292	0.290806	FALSE	FALSE
Zcchc9	20.6285	22.2045	21.7076	27.3874	24.2503	23.2827	24.7766	-0.211211	0.0383545	0.291409	FALSE	FALSE
Zfp395	66.736	59.2413	62.0535	50.1276	62.7105	51.2306	54.7001	0.196317	0.0384313	0.291803	FALSE	FALSE
Clip3	119.192	99.6451	97.6982	86.5203	104.773	84.5582	91.2574	0.201091	0.0385497	0.292512	FALSE	FALSE
Akirin1	56.707	60.2051	55.8315	64.3377	64.6452	61.5817	66.0662	-0.15587	0.0386244	0.29276	FALSE	FALSE
Hax1	112.344	107.092	98.0439	120.806	123.97	103.613	133.819	-0.187938	0.0386324	0.29276	FALSE	FALSE
Kank4	48.5327	37.55	37.3731	33.2119	36.2921	22.8453	39.3738	0.321509	0.0386717	0.292868	FALSE	FALSE
Gdf5	3.39529	1.15153	0.718979	0.330467	1.28423	0.379054	1.28672	1.09035	0.0388084	0.293523	FALSE	FALSE
Npr2	10.571	6.42104	7.48015	6.13429	6.3878	6.35644	5.56151	0.416353	0.0387849	0.293523	FALSE	FALSE
Cpt1c	9.5867	7.13449	6.76117	5.06027	6.95487	6.35644	4.98963	0.421374	0.0388761	0.293769	FALSE	FALSE
Steap3	6.23421	7.45992	7.21745	8.79867	7.8555	10.2782	8.62105	-0.350676	0.0388911	0.293769	FALSE	FALSE
Pikfyve	49.5741	54.5976	55.6794	41.1637	48.7674	51.77	45.3785	0.187493	0.0389306	0.293877	FALSE	FALSE
Cbr2	6.9475	7.23463	6.58143	3.01551	3.88605	4.63612	7.43441	0.54157	0.0389576	0.293891	FALSE	FALSE
Ism1	9.23005	10.4139	9.26377	6.09298	9.07301	7.94555	6.76245	0.366632	0.0390118	0.29411	FALSE	FALSE
Mak16	51.5428	65.0616	62.3853	78.9195	60.9927	71.7724	63.9645	-0.207322	0.0391265	0.294546	FALSE	FALSE
Manba	3.83753	3.26685	3.76082	2.37523	2.55179	2.68254	2.98806	0.447758	0.0391451	0.294546	FALSE	FALSE
Srf	102.543	114.99	113.253	122.81	111.011	131.342	125.241	-0.153071	0.0391247	0.294546	FALSE	FALSE
Cblb	107.223	93.3367	101.777	89.9076	95.1499	87.3136	88.8269	0.158351	0.0391821	0.294601	FALSE	FALSE
Gramd4	33.8958	35.6349	34.5801	40.4408	38.627	37.7596	39.2022	-0.168201	0.0392029	0.294601	FALSE	FALSE
S100pbp	35.6791	35.3721	35.2991	33.1499	32.2559	29.9744	29.709	0.181667	0.0392877	0.295049	FALSE	FALSE
Adss	135.398	140.575	142.316	156.352	145.202	157.118	153.706	-0.134847	0.0393955	0.2951	FALSE	FALSE
Exosc2	72.8132	87.6416	84.9087	99.8009	85.7266	88.6695	92.9015	-0.165761	0.0393572	0.2951	FALSE	FALSE
Hsp90aa1	1965.53	2207	2343.33	2110.9	1967.23	1926.24	1789.38	0.156703	0.0393632	0.2951	FALSE	FALSE
Pigq	63.1695	73.8107	71.5799	80.6751	71.5834	80.9426	77.9898	-0.16208	0.0393841	0.2951	FALSE	FALSE
Kmt2c	88.7483	75.6006	91.4348	61.5081	77.6877	84.1791	70.1265	0.216036	0.0394837	0.295382	FALSE	FALSE
Mta1	290.939	323.243	316.171	366.529	338.62	327.182	336.664	-0.142084	0.0394684	0.295382	FALSE	FALSE
AW554918	27.6901	25.2461	24.5559	21.8521	22.5658	21.8393	23.2325	0.206961	0.0395364	0.295483	FALSE	FALSE
Aph1b	28.8457	21.6538	21.5556	17.4321	21.8486	16.5763	22.1603	0.299626	0.0395476	0.295483	FALSE	FALSE
Cand2	198.838	192.619	193.253	164.345	191.267	164.757	179.97	0.15461	0.0396133	0.295784	FALSE	FALSE
Nxn	165.799	179.364	166.72	193.653	188.398	174.161	199.285	-0.146461	0.03967	0.29583	FALSE	FALSE
Slc37a3	62.2279	57.8395	55.4997	49.4667	53.1539	50.1518	54.9717	0.171884	0.0396652	0.29583	FALSE	FALSE
Agap2	1.98296	1.2767	1.41031	0.74355	1.05074	1.29753	1.00079	0.595696	0.0397112	0.295882	FALSE	FALSE
Snrpb	351.37	393.699	392.466	435.885	409.953	404.174	420.073	-0.138893	0.0397276	0.295882	FALSE	FALSE
Col16a1	11.3414	6.89668	9.44352	7.62138	6.37112	6.15234	7.67746	0.407506	0.039782	0.296098	FALSE	FALSE
Prss35	1.04141	1.46445	1.00934	3.05682	1.45102	1.85153	1.22954	-0.685368	0.0398102	0.29612	FALSE	FALSE
Elovl4	11.2273	12.8671	12.7895	16.6473	13.8764	14.9726	13.868	-0.270196	0.0401	0.298022	FALSE	FALSE
Idh2	243.505	241.634	247.854	273.255	269.205	252.785	279.734	-0.13737	0.0401169	0.298022	FALSE	FALSE
Ccng1	39.5737	38.2259	39.8481	33.3152	32.6729	38.5323	33.7694	0.181213	0.0402715	0.298981	FALSE	FALSE
Ppie	57.1921	57.4389	58.8319	65.0606	63.5111	62.1065	66.009	-0.150281	0.0403696	0.299359	FALSE	FALSE
Sec16b	0.741828	0.788549	1.05082	0.867475	1.16748	2.72627	1.12946	-0.780649	0.0403736	0.299359	FALSE	FALSE
Zfp40	9.32991	8.06072	7.95025	5.98971	5.78738	7.98929	6.36214	0.369096	0.0404013	0.299374	FALSE	FALSE
Eif3b	498.394	614.267	590.448	705.112	588.178	641.607	616.641	-0.168084	0.0404577	0.299413	FALSE	FALSE
Spata24	6.12008	6.45859	5.80714	7.51811	8.15571	8.04761	7.34863	-0.341699	0.0404356	0.299413	FALSE	FALSE
Rae1	92.115	102.236	100.671	115.87	101.254	110.363	108.099	-0.146813	0.0406385	0.30056	FALSE	FALSE
Zfp943	10.7708	10.0509	10.2593	7.91054	7.42186	9.08272	8.83551	0.316343	0.040704	0.300855	FALSE	FALSE
5930430L01Rik	4.00872	3.76751	4.00969	4.13083	5.92081	5.42339	5.77596	-0.43755	0.0408196	0.300903	FALSE	FALSE
Dnajc17	13.0818	14.2565	13.9095	17.8039	15.1272	15.2059	17.5423	-0.255306	0.0407761	0.300903	FALSE	FALSE
Dpy19l4	30.0583	29.9774	33.474	24.3719	28.4199	29.0268	26.4493	0.202759	0.0410081	0.300903	FALSE	FALSE
Gen1	41.6565	46.1739	47.0102	42.2791	37.9099	42.0458	36.7288	0.178149	0.0408867	0.300903	FALSE	FALSE
Nifk	89.2191	103.851	105.109	120.476	98.8025	118.061	109.858	-0.169469	0.0409535	0.300903	FALSE	FALSE
Pros1	28.2608	34.8839	37.4699	30.217	24.8507	32.7444	25.7059	0.241262	0.041023	0.300903	FALSE	FALSE
Pus1	42.1415	55.6616	51.5729	64.2964	52.6535	56.9164	55.4149	-0.202408	0.0410451	0.300903	FALSE	FALSE
Rabggtb	42.7264	52.4698	54.2415	74.7061	52.2032	57.6599	52.098	-0.24746	0.0410016	0.300903	FALSE	FALSE
Senp3	171.191	185.497	183.893	204.042	190.15	194.309	202.745	-0.134479	0.0409453	0.300903	FALSE	FALSE
Sh3pxd2b	145.869	144.73	132.804	125.164	135.211	125.569	124.255	0.146035	0.041001	0.300903	FALSE	FALSE
Sncaip	20.8425	21.3409	26.5884	15.0982	17.7457	25.0613	13.0674	0.368905	0.0408455	0.300903	FALSE	FALSE
Uchl3	54.5814	67.0142	64.5837	72.9298	66.5966	68.8566	70.6126	-0.168122	0.0410221	0.300903	FALSE	FALSE
Zfp74	21.513	18.9627	18.1819	16.7505	16.0446	18.1946	14.5114	0.255865	0.0409125	0.300903	FALSE	FALSE
Adam17	90.8882	83.8991	88.8354	78.8989	79.2388	79.8637	79.8341	0.145077	0.0411254	0.300955	FALSE	FALSE
Chd6	120.091	107.643	120.664	90.775	111.161	107.797	102.509	0.171871	0.0411266	0.300955	FALSE	FALSE
Pgd	177.425	199.027	186.354	213.605	201.608	201.438	208.635	-0.137068	0.0411294	0.300955	FALSE	FALSE
Bnip2	99.3479	100.171	98.7905	113.185	106.091	111.471	106.77	-0.137339	0.0412008	0.301289	FALSE	FALSE
Rpl13	1099.63	1163.21	1154.49	1289.09	1219.94	1201.95	1279.5	-0.131254	0.0413005	0.301829	FALSE	FALSE
Gm4890	2.58213	1.75233	1.53474	1.13598	1.46769	1.31211	1.37251	0.561157	0.0413606	0.302022	FALSE	FALSE
Naaa	8.45969	13.8309	15.7622	19.1671	13.4761	20.7751	14.0968	-0.411519	0.0413785	0.302022	FALSE	FALSE
Col3a1	642.965	542.284	586.577	495.576	529.804	531.652	558.567	0.15913	0.0414599	0.302239	FALSE	FALSE
Nphp1	42.5552	39.5902	38.3686	46.224	49.9183	40.1506	47.7804	-0.195901	0.0414517	0.302239	FALSE	FALSE
Prkrip1	29.5019	31.3167	29.6856	34.8642	32.6395	34.2315	34.6558	-0.17642	0.041517	0.302466	FALSE	FALSE
Arglu1	145.969	155.382	159.696	192.476	167.017	160.252	165.015	-0.155307	0.0416095	0.302836	FALSE	FALSE
D430041D05Rik	3.32396	3.4546	3.60872	3.80037	5.03686	4.67986	5.17549	-0.434457	0.0416454	0.302836	FALSE	FALSE
Rspo1	13.0676	16.935	21.1822	8.9226	10.7575	19.0839	11.0658	0.452379	0.0416359	0.302836	FALSE	FALSE
Bnc1	9.91481	10.4514	10.3561	11.7109	11.1244	15.3663	12.5384	-0.309743	0.0416983	0.303032	FALSE	FALSE
C78339	36.2925	36.1731	35.4512	31.7248	32.2392	32.2487	31.7392	0.169295	0.0418025	0.303412	FALSE	FALSE
Rps15	664.977	718.881	728.271	767.24	768.271	750.979	800.185	-0.132314	0.0417925	0.303412	FALSE	FALSE
Bcar3	5.62077	5.84528	6.55377	7.9312	7.33847	8.6745	6.79105	-0.354944	0.0419078	0.303799	FALSE	FALSE
Ncstn	70.0029	76.1263	74.2623	67.9728	60.6091	72.0786	61.1766	0.166606	0.0418895	0.303799	FALSE	FALSE
Cap2	8.3313	6.92171	8.07469	6.67129	6.20434	5.58376	5.93323	0.35152	0.0419917	0.304218	FALSE	FALSE
Ube2j2	19.8724	25.4464	25.1366	29.804	25.9348	26.2714	27.4787	-0.219986	0.0420869	0.304719	FALSE	FALSE
Tdrkh	6.21994	6.15819	6.13898	4.77111	4.13623	5.0006	4.98963	0.384992	0.0421282	0.30483	FALSE	FALSE
Apold1	3.69487	2.64101	2.90357	3.61448	4.90343	3.68849	5.06112	-0.489174	0.0421817	0.305028	FALSE	FALSE
Ccdc50	236.343	237.579	244.024	221.598	217.202	223.758	212.724	0.129195	0.0422142	0.305063	FALSE	FALSE
Etv1	15.2075	12.8796	14.1031	11.1946	12.1585	11.9256	11.3232	0.270898	0.042256	0.305063	FALSE	FALSE
Snx4	73.7833	79.1803	74.9813	86.417	81.04	86.0307	82.4933	-0.144441	0.0422648	0.305063	FALSE	FALSE
Hn1	154.771	149.461	149.714	159.078	168.401	159.698	184.102	-0.149535	0.0423103	0.305204	FALSE	FALSE
Zfp462	249.753	256.416	283.167	218.418	242.286	260.235	222.803	0.157164	0.0423829	0.305538	FALSE	FALSE
Pik3c3	43.3684	41.6429	43.8854	37.921	37.8431	39.3341	38.516	0.161648	0.0424191	0.305611	FALSE	FALSE
Birc6	189.965	209.929	258.515	165.605	184.412	229.852	168.675	0.229804	0.0424882	0.30592	FALSE	FALSE
Slc25a30	16.7625	17.4482	19.5922	16.2961	14.9605	14.4915	15.0547	0.239355	0.0426317	0.306324	FALSE	FALSE
Snap29	26.7914	25.7468	25.109	20.2204	24.1335	22.1601	22.9895	0.209208	0.0426394	0.306324	FALSE	FALSE
Traf4	180.321	178.087	174.117	197.846	201.858	178.185	209.307	-0.148806	0.0426491	0.306324	FALSE	FALSE
Wtap	149.878	144.167	142.372	163.003	161.279	158.984	156.208	-0.136077	0.0426258	0.306324	FALSE	FALSE
Ddx54	132.93	148.961	146.672	167.03	149.221	158.663	155.193	-0.140831	0.042702	0.306451	FALSE	FALSE
Gfra3	1.82604	2.6285	2.62704	2.747	4.48647	5.46712	2.10165	-0.648796	0.0427192	0.306451	FALSE	FALSE
Ercc8	21.1278	24.7579	27.0447	29.6594	27.4525	27.6855	27.4215	-0.206015	0.0427618	0.306569	FALSE	FALSE
5930403L14Rik	220.779	118.307	112.244	83.4635	128.24	67.6611	146.744	0.497898	0.0428409	0.306948	FALSE	FALSE
Gstp1	66.7074	43.6456	67.6394	74.1897	67.9309	67.5153	73.5006	-0.254813	0.0428995	0.30718	FALSE	FALSE
Cers6	23.1393	24.1071	27.0447	18.8986	21.0981	24.4344	19.9299	0.230671	0.0429664	0.307317	FALSE	FALSE
Srrm2	601.109	611.701	737.23	520.34	567.63	658.154	542.869	0.183772	0.0429713	0.307317	FALSE	FALSE
Rac3	12.9677	11.6029	11.7802	8.24101	8.87287	9.47635	11.9665	0.32797	0.0430597	0.307761	FALSE	FALSE
Arl5a	141.475	143.616	151.663	168.455	167.317	146.767	162.056	-0.146351	0.0431104	0.307884	FALSE	FALSE
Ptp4a1	13.3386	15.5832	15.4442	12.0827	11.4747	13.9813	11.509	0.270123	0.0431295	0.307884	FALSE	FALSE
Ylpm1	172.775	172.767	183.741	149.681	166.233	169.452	153.32	0.143806	0.0432929	0.308861	FALSE	FALSE
Eif5	534.444	583.989	579.235	642.613	597.034	639.712	604.961	-0.134221	0.0435161	0.310265	FALSE	FALSE
Fto	113.928	108.957	113.018	118.224	125.138	121.808	127.271	-0.137081	0.0435758	0.310312	FALSE	FALSE
Lpcat2	1.44086	1.13902	1.1476	1.65233	2.15151	1.41416	2.14454	-0.568325	0.0435591	0.310312	FALSE	FALSE
Gfer	34.0527	41.7681	38.576	44.7576	40.7118	42.0896	45.2212	-0.179401	0.0436487	0.310453	FALSE	FALSE
Utp3	95.8955	101.26	98.3066	109.26	109.06	107.083	106.569	-0.13277	0.0436261	0.310453	FALSE	FALSE
Kdm3a	108.05	91.2714	99.952	75.6562	101.071	85.0685	85.896	0.198376	0.0437136	0.310725	FALSE	FALSE
Ccdc114	3.15277	2.67856	2.37816	1.50775	2.16818	2.20143	1.8586	0.496343	0.0437644	0.310749	FALSE	FALSE
Tmem200b	16.7625	19.2005	20.6015	21.9554	17.579	28.4145	24.3477	-0.291953	0.0437701	0.310749	FALSE	FALSE
Mrpl22	31.5134	32.0802	30.847	35.1121	34.4408	35.2374	36.9004	-0.170369	0.0439024	0.31131	FALSE	FALSE
Tomm7	75.4952	80.6323	76.5713	80.8817	87.2777	82.6046	95.3034	-0.157805	0.043884	0.31131	FALSE	FALSE
Foxn3	31.2566	27.1361	27.2797	22.4924	26.0516	25.3675	24.9339	0.207781	0.0439357	0.311358	FALSE	FALSE
Bnc2	12.5825	13.2551	14.6423	10.3271	10.7075	13.3398	9.20723	0.307979	0.0440103	0.311508	FALSE	FALSE
Exosc5	27.6473	35.2844	35.6448	40.8952	35.4081	39.4216	35.7423	-0.203939	0.0440033	0.311508	FALSE	FALSE
Gatsl2	23.981	18.3369	17.532	12.723	20.2642	12.8295	16.6988	0.351485	0.0440853	0.311688	FALSE	FALSE
Id3	174.087	159.537	144.086	129.481	142.083	154.464	139.481	0.171393	0.0440889	0.311688	FALSE	FALSE
Ccdc136	30.686	20.1268	20.2835	16.7092	20.4977	16.2556	21.9315	0.32957	0.0442119	0.311928	FALSE	FALSE
Ep400	227.912	230.607	263.713	192.683	225.524	234.736	206.162	0.1645	0.0442562	0.311928	FALSE	FALSE
Pex16	9.11592	10.4139	9.56796	12.8262	11.4747	11.8381	11.2374	-0.286983	0.0442412	0.311928	FALSE	FALSE
Rpl3	1635.37	1759.22	1733.14	1958.28	1835.63	1825.38	1860.96	-0.129711	0.044225	0.311928	FALSE	FALSE
Rpl37	287.672	319.65	320.278	337.634	325.878	335.011	361.727	-0.137268	0.0442245	0.311928	FALSE	FALSE
Pgs1	41.3141	47.3004	44.7012	53.0812	47.9169	48.8542	49.3959	-0.164025	0.0443328	0.312279	FALSE	FALSE
Pcdhga5	3.35249	2.34061	2.04633	1.77626	1.86797	1.83695	1.74423	0.512781	0.0443924	0.31251	FALSE	FALSE
Taf6	103.257	99.958	97.1314	90.8163	93.1485	88.2904	91.143	0.140139	0.0444259	0.312559	FALSE	FALSE
Gid4	81.5725	83.7364	90.0384	79.8283	77.9212	75.0089	75.302	0.144551	0.0444909	0.312639	FALSE	FALSE
H2afj	25.9354	30.0024	26.9894	30.6095	34.1906	29.9015	31.8536	-0.194522	0.0444786	0.312639	FALSE	FALSE
Chd4	1053.28	1036.23	1064.99	875.488	1016.94	993.325	919.522	0.144414	0.0445685	0.312997	FALSE	FALSE
Rnps1	322.738	336.936	348.829	376.629	360.135	360.626	373.007	-0.128914	0.044673	0.313542	FALSE	FALSE
Casp8ap2	139.977	132.489	141.39	118.555	131.876	130.118	118.679	0.144307	0.044751	0.313901	FALSE	FALSE
Dpp3	177.81	186.511	186.437	193.653	210.347	203.027	198.527	-0.133567	0.0448231	0.314219	FALSE	FALSE
Mbd3	283.392	307.885	300.741	340.566	309.45	320.811	333.262	-0.13278	0.0449093	0.314634	FALSE	FALSE
Cyfip2	47.905	36.2983	33.958	24.9296	37.3928	35.7623	30.524	0.292023	0.0450425	0.314824	FALSE	FALSE
Dnajc7	199.48	202.782	191.276	234.466	218.97	201.89	219.029	-0.143647	0.0449746	0.314824	FALSE	FALSE
Hras	72.1855	77.816	74.5803	84.0831	82.6578	77.9831	86.8825	-0.147026	0.044991	0.314824	FALSE	FALSE
Ubn2	102.515	104.714	118.162	86.3344	102.105	105.96	91.2717	0.169512	0.0450441	0.314824	FALSE	FALSE
Rtel1	63.8685	69.3798	74.0825	82.1209	71.3833	78.5954	76.2027	-0.15709	0.0450842	0.314916	FALSE	FALSE
Chka	29.9156	30.1651	30.764	35.5665	32.4894	34.0274	34.4699	-0.172685	0.0452232	0.315699	FALSE	FALSE
Als2	55.095	48.9777	46.6507	39.7179	46.149	44.9762	45.6501	0.186643	0.0453818	0.316617	FALSE	FALSE
Dennd1a	46.7779	47.2504	50.8678	47.0502	40.3782	43.0518	41.647	0.167185	0.0454271	0.316744	FALSE	FALSE
Zdhhc3	82.3286	91.3465	88.9184	104.014	94.0825	94.1803	94.6457	-0.143711	0.0455311	0.31728	FALSE	FALSE
Anapc15	30.3293	31.229	30.8332	33.2119	33.4734	36.3163	35.7566	-0.17221	0.0456738	0.317471	FALSE	FALSE
Mt1	21.941	33.2192	35.1332	26.2308	23.0828	26.0381	24.9053	0.264406	0.0456968	0.317471	FALSE	FALSE
Sos2	46.2929	51.1681	58.1544	46.6991	45.5485	48.1107	43.3626	0.175663	0.0455966	0.317471	FALSE	FALSE
Sub1	297.715	315.632	308	342.384	331.682	328.654	339.009	-0.127182	0.0457215	0.317471	FALSE	FALSE
Zcchc24	51.0863	39.3273	41.8391	34.2446	39.044	42.8039	34.6415	0.225696	0.0456287	0.317471	FALSE	FALSE
Zfp157	34.5949	34.984	28.054	26.3754	29.7708	28.0791	28.3079	0.209874	0.0456892	0.317471	FALSE	FALSE
Dbndd2	2.49654	2.99148	2.72383	2.58177	1.91801	1.67658	1.58696	0.503161	0.0457977	0.317812	FALSE	FALSE
Pcdhga6	2.63919	1.8775	2.11546	1.19794	1.6178	1.66201	1.68704	0.513787	0.0458438	0.317942	FALSE	FALSE
Tgif2	79.504	82.0592	84.9087	90.3619	88.6453	88.305	93.9023	-0.136422	0.0458937	0.3181	FALSE	FALSE
Batf3	1.79751	2.64101	2.58556	3.36663	2.90203	3.07617	3.64572	-0.470602	0.046223	0.31838	FALSE	FALSE
Bcl2l2	17.9465	18.3995	18.4999	22.1413	20.2141	23.0348	19.7298	-0.218739	0.0462727	0.31838	FALSE	FALSE
Bloc1s2	32.8116	33.3444	31.6213	38.1482	38.5436	34.4793	35.9282	-0.173583	0.0461977	0.31838	FALSE	FALSE
Dctpp1	86.1661	111.123	112.493	125.97	109.477	115.932	115.491	-0.17643	0.0459658	0.31838	FALSE	FALSE
Dda1	71.0585	78.3793	74.6909	89.9902	80.7565	78.9015	82.3075	-0.151085	0.0463153	0.31838	FALSE	FALSE
E130308A19Rik	40.8433	39.1521	41.0648	34.5544	36.9258	37.4243	35.0132	0.165112	0.0463107	0.31838	FALSE	FALSE
Fbxo38	81.4299	89.2938	89.9969	75.9453	79.3555	84.1062	73.9724	0.149565	0.0462304	0.31838	FALSE	FALSE
Idh3a	77.1358	89.3063	87.1763	101.433	86.744	93.9616	93.8451	-0.152582	0.0460231	0.31838	FALSE	FALSE
Mfsd10	29.1167	30.841	30.6258	34.7403	32.3726	35.5436	33.5549	-0.17333	0.0461314	0.31838	FALSE	FALSE
Rpl18a	852.431	905.004	927.096	1015.75	952.416	931.992	1024.3	-0.132767	0.046256	0.31838	FALSE	FALSE
Rpl19	880.521	998.616	995.828	1061.81	1033.81	1034.28	1070.64	-0.131975	0.0462734	0.31838	FALSE	FALSE
Serinc3	82.3714	73.8483	72.5616	78.0108	87.0609	90.9584	86.2391	-0.166576	0.0462394	0.31838	FALSE	FALSE
Sostdc1	5.32119	4.99414	4.4798	3.32532	3.40238	4.27165	3.78869	0.41344	0.0459905	0.31838	FALSE	FALSE
Syt11	46.5354	35.2594	25.6897	21.6249	37.5763	18.5007	28.4366	0.433048	0.0461178	0.31838	FALSE	FALSE
Tmem256	19.7868	17.5859	17.2417	18.2583	21.6985	22.1601	24.362	-0.249447	0.0464439	0.319077	FALSE	FALSE
Adamts17	14.5655	9.02451	6.69204	13.9829	16.8952	9.70961	16.1984	-0.492144	0.0464864	0.319181	FALSE	FALSE
Fam115a	108.064	89.1937	88.4068	74.1278	92.1812	81.7736	85.0239	0.193035	0.0465143	0.319185	FALSE	FALSE
Clk3	54.667	60.4179	56.3016	67.1673	63.778	61.3338	61.92	-0.153081	0.0466152	0.31969	FALSE	FALSE
Smarcd3	32.0413	21.8916	23.3945	19.5388	23.2329	20.1336	22.2317	0.275518	0.0466919	0.319841	FALSE	FALSE
Tmem199	20.3575	25.5966	23.2009	29.5768	24.1502	27.2773	26.1634	-0.215893	0.0466707	0.319841	FALSE	FALSE
2410006H16Rik	22.6257	25.0208	26.6437	29.143	26.6019	30.2077	27.3786	-0.194036	0.0467799	0.31997	FALSE	FALSE
Gm5088	8.10304	3.04155	8.91811	10.926	8.78948	10.4823	9.30731	-0.563024	0.0467601	0.31997	FALSE	FALSE
Rcan2	3.82327	2.94141	2.35051	1.81757	2.6185	1.90985	2.17313	0.510611	0.0467928	0.31997	FALSE	FALSE
Magi1	57.5202	56.8882	55.2646	45.3152	54.3213	46.2883	53.9423	0.178318	0.0470052	0.321234	FALSE	FALSE
Klhl29	31.328	26.9859	30.128	24.847	24.8007	25.8631	27.4501	0.194918	0.047106	0.321634	FALSE	FALSE
Nmnat2	1.54072	2.1028	2.51643	1.01205	0.917308	1.93901	1.51548	0.601838	0.0471187	0.321634	FALSE	FALSE
Trmt11	17.6897	20.5523	19.8687	23.8762	20.7312	23.443	21.8314	-0.213481	0.0471603	0.32173	FALSE	FALSE
Rfx7	124.784	140.099	150.419	121.323	127.706	130.307	121.896	0.143671	0.0472032	0.321835	FALSE	FALSE
Tnks	129.649	121.9	130.578	97.6116	123.87	120.364	111.359	0.168544	0.0473326	0.322529	FALSE	FALSE
Psmc1	245.146	274.315	270.267	307.478	279.145	285.763	284.123	-0.135167	0.0473932	0.322566	FALSE	FALSE
Smad7	45.066	41.5678	37.4008	40.668	33.7403	30.4701	37.5438	0.216306	0.0473672	0.322566	FALSE	FALSE
Mphosph6	32.3979	38.9143	37.9262	44.7163	39.7778	41.3752	39.145	-0.179211	0.0474228	0.32258	FALSE	FALSE
Nol12	37.1057	41.5928	41.6593	49.5906	41.1288	44.116	46.3936	-0.174826	0.0475411	0.323196	FALSE	FALSE
Ankrd6	24.3091	22.5425	27.2521	28.069	30.6214	28.327	26.721	-0.203144	0.047646	0.323721	FALSE	FALSE
1700123O20Rik	35.9358	34.4333	38.1336	41.9486	41.2122	39.4362	39.6454	-0.165131	0.0479184	0.323733	FALSE	FALSE
2700094K13Rik	176.555	176.285	176.219	193.178	193.619	179.482	212.438	-0.14267	0.0480906	0.323733	FALSE	FALSE
Btbd7	73.9545	72.121	77.8295	64.2964	69.8489	70.7956	63.5642	0.152753	0.0480332	0.323733	FALSE	FALSE
Ccna2	240.466	250.759	253.772	274.638	269.005	262.043	279.477	-0.127532	0.0480394	0.323733	FALSE	FALSE
Clk4	26.4347	21.7164	23.7678	30.2377	27.6527	25.7028	27.5502	-0.212563	0.0478982	0.323733	FALSE	FALSE
Dedd2	12.8536	12.1787	11.8079	9.29437	11.5247	8.84945	10.2509	0.298935	0.0479427	0.323733	FALSE	FALSE
Fam208a	49.4029	47	53.5501	43.3944	44.9815	48.0815	41.1037	0.171	0.0480729	0.323733	FALSE	FALSE
Hmg20a	89.8753	90.4704	95.3892	85.9213	84.309	79.2514	84.8237	0.137332	0.0480508	0.323733	FALSE	FALSE
Ibtk	108.82	108.081	112.493	98.1899	101.221	103.336	97.9483	0.132239	0.0479433	0.323733	FALSE	FALSE
Irs2	43.3399	35.2469	32.4232	40.2343	46.5159	41.4918	43.8058	-0.217446	0.0478795	0.323733	FALSE	FALSE
Lpp	76.2085	72.4464	83.0283	59.6492	68.081	80.9426	58.3172	0.210025	0.0478177	0.323733	FALSE	FALSE
Pdzk1ip1	1.61205	0.851132	1.07847	1.28056	2.0014	2.34722	1.62985	-0.626086	0.0480475	0.323733	FALSE	FALSE
Rpl29	443.841	475.107	479.02	519.597	497.448	498.529	520.694	-0.127529	0.0478794	0.323733	FALSE	FALSE
Rps26	521.99	579.871	601.454	630.943	608.426	613.295	639.045	-0.133734	0.0480221	0.323733	FALSE	FALSE
Sf3a2	104.369	122.876	116.724	138.527	121.602	124.461	123.654	-0.147794	0.0478705	0.323733	FALSE	FALSE
Zfp354c	77.9775	67.0016	72.8243	62.5201	69.2318	64.3225	62.8493	0.16533	0.0478806	0.323733	FALSE	FALSE
Akap1	42.7122	53.1707	54.5318	62.8506	51.1358	61.7712	54.2712	-0.197389	0.0481519	0.323784	FALSE	FALSE
Sbno2	36.478	38.1883	38.4101	33.8728	34.2073	33.2401	33.655	0.15981	0.0481536	0.323784	FALSE	FALSE
Akap2	204.93	152.578	142.745	131.712	159.578	128.485	147.644	0.233185	0.0482609	0.32395	FALSE	FALSE
Kmt2d	174.629	180.953	210.467	162.238	173.838	184.774	152.849	0.163802	0.0482844	0.32395	FALSE	FALSE
Ppil4	67.863	64.3356	63.3393	72.1863	70.3325	74.0613	72.1566	-0.147381	0.0482414	0.32395	FALSE	FALSE
Sema3b	5.40678	4.48096	4.70102	3.20139	3.91941	4.32996	2.84509	0.442887	0.0482891	0.32395	FALSE	FALSE
Scg5	1.41233	2.29055	2.19842	0.598971	0.883952	2.15769	1.14376	0.708347	0.0483176	0.323955	FALSE	FALSE
4932438A13Rik	59.9597	59.9798	74.2208	47.4219	54.855	68.2006	50.3252	0.22899	0.0484018	0.324334	FALSE	FALSE
Ankmy2	24.1665	23.4812	22.9244	20.0552	21.4817	20.017	20.3731	0.199704	0.0484419	0.324416	FALSE	FALSE
Stk16	55.8225	57.3263	58.7904	66.8988	61.96	60.4154	64.9367	-0.14875	0.0485272	0.324802	FALSE	FALSE
Sumo3	214.602	233.673	231.304	255.285	235.565	256.197	244.978	-0.130627	0.0486635	0.325528	FALSE	FALSE
Cerk	37.5622	32.5683	31.1788	38.6852	41.6958	34.6689	40.2459	-0.20123	0.0487642	0.325829	FALSE	FALSE
Pik3c2b	25.6216	26.285	27.017	25.2187	19.4803	24.6968	21.1881	0.216882	0.0487408	0.325829	FALSE	FALSE
Cdh4	6.09155	5.39468	5.36469	2.93289	4.88675	4.00922	4.6894	0.440622	0.048893	0.326503	FALSE	FALSE
AI314180	167.396	182.806	190.958	164.366	158.494	176.523	155.436	0.140012	0.0490492	0.326621	FALSE	FALSE
Clhc1	11.3271	16.9851	21.2237	21.6456	19.6638	20.5272	20.5447	-0.318353	0.0492915	0.326621	FALSE	FALSE
Crnde	3.32396	3.27936	3.76082	4.66784	4.43644	5.11723	4.14611	-0.41041	0.0492176	0.326621	FALSE	FALSE
Ddx49	35.0942	37.8253	35.6448	43.415	39.0106	39.13	40.7463	-0.164393	0.0492958	0.326621	FALSE	FALSE
Dzank1	2.81039	1.502	1.52092	1.11532	1.45102	1.28295	1.32962	0.582191	0.0491904	0.326621	FALSE	FALSE
Ewsr1	490.662	486.76	472.646	538.02	517.429	519.595	537.408	-0.127746	0.0492922	0.326621	FALSE	FALSE
Fbxl12os	2.48227	1.60213	1.89423	1.2186	1.41766	1.63285	1.24383	0.527459	0.0491873	0.326621	FALSE	FALSE
Hddc2	25.3505	27.8871	27.1553	29.4735	29.087	31.6364	31.2817	-0.180785	0.0490619	0.326621	FALSE	FALSE
Hsdl1	30.0583	29.1263	27.3765	25.3427	25.9848	24.7697	25.4486	0.184746	0.0491842	0.326621	FALSE	FALSE
Mdh2	234.075	258.97	253.468	276.291	263.618	269.711	278.619	-0.128666	0.0493131	0.326621	FALSE	FALSE
Tmem70	34.1383	37.5875	37.7188	34.8436	30.7215	32.7736	31.3532	0.170901	0.0490769	0.326621	FALSE	FALSE
Tomm34	29.4163	33.6823	34.3727	30.9399	28.0696	28.881	26.049	0.190807	0.0492311	0.326621	FALSE	FALSE
Trmt6	63.8115	74.3865	71.3449	83.4428	70.1157	82.7358	76.603	-0.163096	0.0493297	0.326621	FALSE	FALSE
Wnt16	2.08282	1.00133	0.525408	0.4957	4.35305	2.90122	2.35899	-1.07262	0.0492834	0.326621	FALSE	FALSE
Zfp316	36.3924	29.3015	31.4277	25.322	30.7215	26.5338	28.8369	0.216254	0.0491861	0.326621	FALSE	FALSE
Rpap2	17.2618	20.7276	22.4266	17.3495	16.9785	17.5531	16.9133	0.227928	0.0494542	0.32726	FALSE	FALSE
A830082N09Rik	8.75927	8.04821	7.72903	6.11363	6.50455	7.11455	6.34784	0.325897	0.0495716	0.3276	FALSE	FALSE
Abhd4	37.7619	29.9523	28.9804	28.6473	29.2038	25.7465	26.9211	0.222429	0.0496177	0.3276	FALSE	FALSE
Chd7	232.406	251.772	283.167	216.187	232.179	253.47	214.526	0.158917	0.0495392	0.3276	FALSE	FALSE
Pes1	144.4	170.539	168.877	194.087	167.767	180.211	173.408	-0.149154	0.0495967	0.3276	FALSE	FALSE
Ddx6	507.667	499.602	508.609	427.458	486.457	473.526	450.411	0.137109	0.0496589	0.327628	FALSE	FALSE
Tsr3	25.8356	26.4978	27.0862	32.2411	28.2698	29.4787	30.1522	-0.181553	0.049678	0.327628	FALSE	FALSE
Rps3a1	1342.01	1388.75	1369.81	1533.88	1462.52	1463.54	1497.18	-0.123741	0.0497663	0.328026	FALSE	FALSE
Slc20a2	70.8303	82.9103	78.8803	92.985	80.6231	87.5469	83.923	-0.153458	0.049872	0.328352	FALSE	FALSE
Tmod2	38.3611	41.1923	45.0192	41.0192	32.6395	38.2261	33.6121	0.191776	0.0498557	0.328352	FALSE	FALSE
Mrpl4	49.8309	52.7201	52.4855	55.8902	56.7564	56.1291	60.6047	-0.150259	0.049901	0.328358	FALSE	FALSE
Ctps	168.081	191.129	194.76	227.134	184.029	209.908	201.716	-0.155484	0.0499998	0.328359	FALSE	FALSE
Igf1	105.325	53.7215	55.0987	36.6405	55.689	53.7819	66.8668	0.422493	0.0499706	0.328359	FALSE	FALSE
Uhmk1	31.2709	34.8464	36.2393	30.7334	29.2038	32.0884	28.5081	0.179447	0.0500135	0.328359	FALSE	FALSE
Zfp60	56.65	50.6424	52.8865	46.0794	50.6688	47.7316	46.1791	0.163496	0.0500124	0.328359	FALSE	FALSE
Cep57l1	15.2217	14.1188	15.1677	12.3305	12.6755	11.6924	13.2819	0.247388	0.0501402	0.328822	FALSE	FALSE
Mfsd2a	8.8306	10.5015	9.56796	11.8348	10.8743	10.7739	14.0968	-0.304203	0.0501165	0.328822	FALSE	FALSE
Sdk1	13.4242	10.4514	11.2686	6.36148	10.7742	9.53466	9.62184	0.366413	0.0503462	0.329988	FALSE	FALSE
Ctnnbl1	99.1767	106.179	97.2973	119.877	112.946	102.068	112.145	-0.147286	0.0503963	0.330131	FALSE	FALSE
Gab1	55.1092	50.4421	51.8357	42.878	49.2845	49.1604	45.3499	0.168275	0.0505238	0.330781	FALSE	FALSE
Myo19	20.1149	24.0946	24.9845	28.9571	24.8174	27.1315	25.6058	-0.206393	0.0506771	0.331599	FALSE	FALSE
Cltc	345.135	365.636	400.886	295.664	333	379.36	311.873	0.16722	0.0508731	0.331768	FALSE	FALSE
Jak2	45.6652	41.6429	43.9545	36.0622	41.012	40.2089	38.2586	0.169575	0.0508714	0.331768	FALSE	FALSE
Lonp2	57.7484	53.396	54.2276	49.1569	49.568	49.7581	49.9964	0.151562	0.050763	0.331768	FALSE	FALSE
Map1s	60.5018	64.8112	65.0262	72.9711	66.3464	70.6498	70.4553	-0.143753	0.0507934	0.331768	FALSE	FALSE
Mcts2	12.3971	11.8157	11.7387	16.1102	13.6762	14.0687	13.482	-0.257256	0.0508463	0.331768	FALSE	FALSE
Nol9	97.3649	118.783	118.079	139.808	111.745	131.473	119.337	-0.172556	0.0507335	0.331768	FALSE	FALSE
Id1	96.4661	83.7614	77.1797	68.1381	73.9351	78.9744	81.0922	0.183378	0.05091	0.331823	FALSE	FALSE
Bcl2	26.5917	28.6882	28.0955	28.8745	31.6221	40.5442	29.3516	-0.230728	0.0510994	0.332728	FALSE	FALSE
Cul7	198.667	196.924	199.531	186.135	185.63	179.482	175.052	0.127769	0.0511057	0.332728	FALSE	FALSE
Parp4	5.96315	5.65753	5.6827	3.32532	4.46979	5.26302	4.26049	0.410643	0.0512894	0.333552	FALSE	FALSE
Ssu72	63.0411	69.0419	66.312	75.1192	70.1324	72.7784	73.858	-0.141761	0.0512731	0.333552	FALSE	FALSE
Fam96b	29.8728	37.4999	34.7599	42.0725	38.1767	36.3746	38.2729	-0.184832	0.0513262	0.333606	FALSE	FALSE
Ddx27	92.5858	109.771	107.971	127.643	106.841	116.676	110.601	-0.157914	0.0513564	0.333617	FALSE	FALSE
Nt5dc2	292.779	316.922	317.817	343.148	340.822	326.686	339.552	-0.126635	0.051398	0.333702	FALSE	FALSE
Pik3cd	6.10581	4.61864	4.67337	3.7384	4.06951	3.68849	3.96025	0.408582	0.0514642	0.333946	FALSE	FALSE
Tfpi	8.88767	10.7393	9.87214	8.34428	7.17168	9.22851	6.37643	0.338661	0.051548	0.334304	FALSE	FALSE
Aga	4.66496	4.54354	4.34153	5.96905	5.72067	6.7355	5.20409	-0.387067	0.0516638	0.334314	FALSE	FALSE
Dync2h1	43.1116	40.9044	52.527	33.0467	38.9773	47.8191	33.8694	0.243499	0.0516612	0.334314	FALSE	FALSE
Snx33	25.322	20.9904	22.2469	18.4235	21.3649	18.0051	20.173	0.229014	0.0516565	0.334314	FALSE	FALSE
Tmx2	73.2555	72.3087	69.9346	62.4375	66.6133	63.0979	67.6531	0.145073	0.0516577	0.334314	FALSE	FALSE
Smyd5	66.1653	83.9742	81.0096	97.4876	79.6891	89.1214	82.7507	-0.179078	0.0518069	0.334457	FALSE	FALSE
St8sia1	7.37548	6.58376	7.30041	5.26681	5.43714	6.72092	4.36057	0.379139	0.0517363	0.334457	FALSE	FALSE
Tfrc	135.227	177.974	173.578	200.924	177.174	185.503	169.547	-0.175551	0.0517592	0.334457	FALSE	FALSE
Tmem206	20.9709	22.4173	22.3437	18.1963	19.0467	18.6903	20.2159	0.202322	0.051829	0.334457	FALSE	FALSE
Ube2g2	70.0029	80.3444	76.6543	93.1089	81.974	78.6974	83.6371	-0.156193	0.0517891	0.334457	FALSE	FALSE
Actg1	2998.9	2850.92	2890.24	3121.36	3122.4	3095.34	3449.47	-0.13411	0.0519307	0.334559	FALSE	FALSE
Rsf1	109.562	106.442	117.443	92.1382	105.774	107.403	94.7458	0.151985	0.0518805	0.334559	FALSE	FALSE
Ube2i	492.117	522.908	517.79	588.127	545.281	534.437	566.945	-0.128858	0.0519251	0.334559	FALSE	FALSE
Proser2	3.42382	5.53236	4.36918	5.14289	5.93749	6.02113	6.81964	-0.429141	0.0520528	0.334977	FALSE	FALSE
Zfp940	12.3543	11.7531	11.9185	9.25306	9.54001	10.2053	10.7084	0.273432	0.0520338	0.334977	FALSE	FALSE
Eif4e	221.065	248.781	249.762	281.619	243.554	270.411	261.362	-0.139465	0.0521184	0.335046	FALSE	FALSE
Jade1	39.1171	44.2839	47.2176	38.8918	39.4943	39.0134	38.0156	0.164463	0.0521495	0.335046	FALSE	FALSE
Pole	104.598	110.284	121.521	95.2363	103.572	108.22	98.2629	0.146042	0.0521271	0.335046	FALSE	FALSE
Fermt2	165.656	163.743	160.277	182.066	179.943	166.011	189.334	-0.13578	0.0522713	0.33546	FALSE	FALSE
Slc16a13	15.5784	14.1939	14.3381	11.5663	12.4921	12.4359	13.0245	0.247142	0.0522435	0.33546	FALSE	FALSE
Ntrk2	3.28116	2.11531	1.96337	4.70915	3.86937	6.02113	1.58696	-0.721286	0.0523447	0.335747	FALSE	FALSE
Rps20	725.779	783.618	785.153	851.777	828.229	821.177	831.724	-0.123506	0.0524148	0.335878	FALSE	FALSE
Srm	100.575	161.903	149.824	208.586	136.462	172.178	151.262	-0.281943	0.0524226	0.335878	FALSE	FALSE
Dlg5	282.865	239.807	241.397	205.199	246.956	196.073	245.021	0.189586	0.0525544	0.336484	FALSE	FALSE
Hdgf	529.779	639.401	605.146	749.436	627.656	638.589	628.064	-0.160182	0.0525748	0.336484	FALSE	FALSE
Creld1	12.8679	13.906	13.633	10.3064	11.6915	12.2318	10.7942	0.25818	0.0526805	0.336793	FALSE	FALSE
Trf	3.70914	3.9052	4.00969	2.91224	2.88535	3.16364	2.75931	0.402816	0.0526724	0.336793	FALSE	FALSE
Rn45s	2383.22	6745.45	4307.63	3084.74	2945.03	13631	14269.8	-0.921415	0.0527225	0.336877	FALSE	FALSE
Pim1	39.7876	42.3063	40.7053	46.3892	44.9314	45.2678	45.3356	-0.151708	0.0527658	0.336888	FALSE	FALSE
Pou2f2	4.16565	2.75366	3.15245	1.52841	3.11885	2.72627	1.77282	0.550376	0.0527819	0.336888	FALSE	FALSE
Asl	14.5798	12.0661	5.43383	13.6317	16.2947	13.6897	16.0984	-0.481481	0.0528683	0.337255	FALSE	FALSE
Lmbrd1	24.1379	22.2546	24.1964	19.5801	20.6645	21.402	20.4017	0.19728	0.0529013	0.337282	FALSE	FALSE
Bak1	71.2012	70.2184	70.0314	76.441	77.8378	74.28	82.7507	-0.143129	0.0529645	0.337501	FALSE	FALSE
Psma7	229.325	252.987	253.565	267.926	266.82	261.022	276.145	-0.127584	0.0530355	0.337769	FALSE	FALSE
2310045N01Rik	10.999	10.7268	11.2271	12.6817	13.1092	12.0423	15.0118	-0.266891	0.0532425	0.338163	FALSE	FALSE
Dcaf17	37.0343	39.1521	40.6776	34.6164	33.1232	38.4448	31.9251	0.174025	0.0532673	0.338163	FALSE	FALSE
Dohh	53.54	62.6959	60.2145	73.1157	63.0941	63.7394	63.4355	-0.162129	0.0533589	0.338163	FALSE	FALSE
Hdgfrp3	159.964	154.768	165.393	143.133	149.805	146.198	146.858	0.127461	0.0533569	0.338163	FALSE	FALSE
Pfn1	671.939	764.067	763.252	844.094	784.065	795.124	789.42	-0.131686	0.0532973	0.338163	FALSE	FALSE
Rad54b	19.4016	15.2077	16.7578	16.2961	15.4942	11.8527	12.2382	0.294871	0.0531686	0.338163	FALSE	FALSE
Rps19bp1	31.2281	34.7713	34.7875	41.2464	34.0405	38.1824	38.2729	-0.174667	0.053328	0.338163	FALSE	FALSE
Timm50	85.0962	92.9862	91.6422	105.667	94.6996	94.9384	100.593	-0.138242	0.053183	0.338163	FALSE	FALSE
Txnip	38.8318	30.6658	29.9344	30.7747	34.2239	19.288	17.814	0.377633	0.0533057	0.338163	FALSE	FALSE
Zfp326	82.2002	78.1915	80.9681	68.7577	73.1345	75.4755	74.2869	0.141519	0.0533865	0.338163	FALSE	FALSE
Taf5l	73.9545	83.8365	83.4431	98.2312	81.2235	91.2354	87.3114	-0.154075	0.0535456	0.338987	FALSE	FALSE
Ptpn21	22.9824	23.4812	23.0488	21.6456	19.4469	20.5418	19.2437	0.197324	0.0535757	0.338994	FALSE	FALSE
B4galnt2	6.77631	0.563249	4.78398	4.4613	0.366923	0.772687	0.457502	1.4199	0.053689	0.339431	FALSE	FALSE
Ggps1	33.0399	33.5822	34.9535	29.8453	31.5554	29.4204	29.7233	0.168101	0.053761	0.339431	FALSE	FALSE
Pomp	119.705	136.444	132.79	146.108	139.948	139.681	142.226	-0.131014	0.0537561	0.339431	FALSE	FALSE
Rps25	446.794	483.931	504.018	512.533	510.54	523.342	544.842	-0.128561	0.0537099	0.339431	FALSE	FALSE
2700062C07Rik	15.1789	17.9739	16.7854	18.9812	18.9966	19.4046	20.0443	-0.217524	0.0538022	0.339509	FALSE	FALSE
Cnppd1	34.9515	33.482	31.9669	30.5682	30.2545	28.6623	29.2229	0.173741	0.053933	0.339973	FALSE	FALSE
Rem2	8.75927	7.15953	7.4525	3.90364	6.8548	6.21065	6.5194	0.404678	0.053934	0.339973	FALSE	FALSE
Zmat3	35.9786	38.0882	39.1844	34.8642	31.9057	35.3395	32.9116	0.161605	0.053963	0.339973	FALSE	FALSE
Bace1	60.8584	59.3039	60.9888	50.4788	58.3575	54.2484	53.7994	0.154951	0.0540481	0.340326	FALSE	FALSE
Plod1	41.043	37.0618	35.1747	34.4098	36.8258	29.0851	31.0815	0.201507	0.0540918	0.340417	FALSE	FALSE
1500011B03Rik	12.4256	12.9172	13.2458	16.0896	14.5102	15.5121	14.4971	-0.235649	0.0541749	0.340658	FALSE	FALSE
Cers2	61.4433	63.5095	63.9477	73.9419	65.2957	68.186	71.1273	-0.144974	0.0541883	0.340658	FALSE	FALSE
Smox	26.9198	20.4147	18.4169	21.9141	28.8035	24.0699	33.8694	-0.310528	0.0543065	0.341217	FALSE	FALSE
Slc1a3	24.0523	30.065	21.3205	23.7729	20.0474	21.2416	20.0729	0.241736	0.0544117	0.341695	FALSE	FALSE
5730408K05Rik	1.64058	2.3281	2.14311	3.63513	2.55179	2.55132	2.65923	-0.478606	0.0544787	0.341838	FALSE	FALSE
Bbc3	12.5825	13.3177	13.9095	11.4217	11.0077	10.5844	11.5948	0.251108	0.0546266	0.341838	FALSE	FALSE
Cdca2	95.8242	93.5369	96.3709	86.9127	89.129	84.9081	87.1112	0.13037	0.0546392	0.341838	FALSE	FALSE
Cep70	21.1278	18.6373	18.5829	13.8796	18.5963	16.416	16.5416	0.248523	0.0545297	0.341838	FALSE	FALSE
Ddx39	140.833	182.58	177.228	204.827	169.519	189.804	186.761	-0.16963	0.0546215	0.341838	FALSE	FALSE
Pdlim7	77.9062	73.2975	71.3172	78.8369	81.2402	80.7239	87.9548	-0.148347	0.054544	0.341838	FALSE	FALSE
Zfp207	279.184	301.914	308.995	349.696	326.412	316.831	309.357	-0.133839	0.0546349	0.341838	FALSE	FALSE
Prdm1	8.55955	13.7183	14.4764	16.1516	14.8104	15.2205	14.8259	-0.315168	0.054744	0.342311	FALSE	FALSE
Tspan18	25.9212	25.171	25.109	32.7368	30.3879	30.2223	24.3906	-0.2117	0.0549738	0.343564	FALSE	FALSE
Ephb6	19.8154	15.6458	15.859	12.186	15.5275	13.5293	15.3263	0.273247	0.055122	0.344307	FALSE	FALSE
Atp8a1	14.1946	12.1286	11.9046	7.91054	10.1905	12.9607	9.27871	0.335487	0.0553202	0.344624	FALSE	FALSE
Ift80	57.2919	47.8011	45.6828	43.3531	47.0329	42.906	43.334	0.186618	0.0553155	0.344624	FALSE	FALSE
Rnf4	151.076	148.422	151.304	164.304	158.461	164.611	167.746	-0.124283	0.0552261	0.344624	FALSE	FALSE
Srfbp1	26.3064	32.4056	31.6074	38.3135	31.1385	34.6689	33.7837	-0.194631	0.0552605	0.344624	FALSE	FALSE
Tmem64	36.7062	34.9966	34.3727	38.2515	39.1107	40.9232	39.7169	-0.160221	0.0553174	0.344624	FALSE	FALSE
Prodh	12.3828	16.6096	15.6655	19.4562	16.4615	18.1654	16.8275	-0.250843	0.0553625	0.344704	FALSE	FALSE
Hebp1	11.5269	7.62264	6.29107	11.4837	9.28983	15.964	9.63614	-0.451723	0.0554605	0.344947	FALSE	FALSE
Pde4a	6.81911	6.80906	6.27724	5.49401	5.30371	5.59834	4.17471	0.368729	0.0554457	0.344947	FALSE	FALSE
Aagab	61.158	78.7798	76.5575	65.1432	61.493	66.8301	63.9073	0.165692	0.0555232	0.344967	FALSE	FALSE
Ankrd40	108.278	108.97	112.672	132.207	118.266	119.183	114.29	-0.13732	0.0555818	0.344967	FALSE	FALSE
Eef1d	274.177	344.133	335.39	384.374	332.249	349.575	349.846	-0.155099	0.0555546	0.344967	FALSE	FALSE
Phb	230.609	282.388	267.875	303.843	271.29	291.58	283.766	-0.143912	0.0555388	0.344967	FALSE	FALSE
Slc8a3	1.9687	1.53955	1.75597	1.54906	3.56916	1.70574	4.37486	-0.677089	0.0556185	0.345012	FALSE	FALSE
A830010M20Rik	5.43531	4.98163	5.39235	4.00691	4.20294	4.11128	3.97455	0.370849	0.0556875	0.345257	FALSE	FALSE
Rnf214	54.7669	51.5561	52.8726	47.36	48.9509	47.7316	47.5945	0.147328	0.0557526	0.345477	FALSE	FALSE
Cachd1	150.591	152.127	162.24	141.295	142.483	137.524	146.801	0.125953	0.0559797	0.345967	FALSE	FALSE
Dync2li1	24.5374	19.5009	17.5735	16.1929	19.3635	15.4683	17.1563	0.268609	0.0559542	0.345967	FALSE	FALSE
H2afy	489.007	538.491	517.32	584.637	558.991	526.695	586.489	-0.13176	0.0558742	0.345967	FALSE	FALSE
Myl9	11.0989	8.16086	8.94576	9.64549	12.0084	14.3312	11.5662	-0.340242	0.0559096	0.345967	FALSE	FALSE
Stxbp2	22.8825	20.7401	20.4218	16.7092	18.0126	20.017	18.6003	0.218339	0.0559485	0.345967	FALSE	FALSE
Cep78	59.1893	65.3369	62.2332	71.3188	67.5973	66.3928	69.5832	-0.142276	0.0560798	0.346079	FALSE	FALSE
Prpf38b	129.263	135.681	140.021	162.486	144.067	144.974	141.897	-0.135895	0.0560385	0.346079	FALSE	FALSE
Sdc4	13.039	14.7571	14.2552	10.5336	12.7589	12.6254	10.8371	0.261515	0.0561162	0.346079	FALSE	FALSE
Slc16a1	110.789	137.095	140.45	149.557	130.508	153.852	145.157	-0.161323	0.0561009	0.346079	FALSE	FALSE
Smc6	203.846	227.916	234.346	213.337	194.253	211.862	186.632	0.140016	0.0561744	0.346256	FALSE	FALSE
Hnrnpd	878.153	953.544	908.514	1040.06	960.072	970.466	1013.42	-0.124871	0.0564385	0.3477	FALSE	FALSE
Pisd-ps3	9.24432	6.75899	6.08367	3.09812	3.93609	3.60101	8.79262	0.597238	0.0564839	0.347797	FALSE	FALSE
Uck2	123.215	149.924	147.488	166.059	146.936	152.278	155.765	-0.146854	0.0567495	0.349248	FALSE	FALSE
Zfp36l1	184.872	179.902	192.272	163.891	173.004	178.082	164.215	0.128895	0.0567819	0.349264	FALSE	FALSE
Zfp217	72.0001	76.3015	79.1569	68.1381	70.9663	68.5942	67.9819	0.137683	0.056868	0.34961	FALSE	FALSE
Uba6	59.1465	64.999	67.8883	56.4891	56.1059	63.1271	54.214	0.155076	0.0569402	0.34987	FALSE	FALSE
Ahcyl2	45.0375	42.2938	42.1294	37.7558	41.2789	35.0188	39.4024	0.169725	0.0570079	0.350102	FALSE	FALSE
Dhx38	140.79	156.921	153.087	134.169	109.76	130.161	156.494	0.179847	0.0573562	0.351502	FALSE	FALSE
Dusp23	3.82327	4.69374	4.42449	4.2341	2.852	3.10533	2.53056	0.444423	0.0573391	0.351502	FALSE	FALSE
Kif3a	57.2063	51.2557	48.7662	43.952	49.4679	43.7224	48.6382	0.173978	0.0573432	0.351502	FALSE	FALSE
Zzef1	32.5263	34.4333	36.903	25.9829	31.0717	34.9167	28.2222	0.203467	0.057286	0.351502	FALSE	FALSE
Nub1	48.875	49.8413	50.453	41.9693	46.7994	45.9093	44.392	0.151057	0.0574297	0.351643	FALSE	FALSE
Thsd7a	4.12285	3.84261	4.07883	2.39588	2.83532	3.7468	2.94517	0.425637	0.0574393	0.351643	FALSE	FALSE
Galk1	113.443	122.338	114.097	127.973	123.169	128.82	128.672	-0.12468	0.0576243	0.352349	FALSE	FALSE
Mzt1	87.2504	65.9502	66.9204	55.0846	56.9065	70.8685	68.6968	0.221831	0.0576419	0.352349	FALSE	FALSE
Smarca2	56.008	40.4663	43.6503	41.1844	41.1955	39.684	39.7598	0.207178	0.057645	0.352349	FALSE	FALSE
Aars2	40.1586	44.0461	43.4291	48.909	41.9794	48.8105	51.1687	-0.165539	0.0577816	0.352999	FALSE	FALSE
Ppp1r21	27.9469	26.4978	23.7401	20.8607	24.1836	22.6412	22.9609	0.201071	0.0578698	0.353353	FALSE	FALSE
Mrpl32	24.9226	26.9233	24.6665	28.668	28.053	29.0705	29.2944	-0.173812	0.058009	0.354018	FALSE	FALSE
Zbed6	91.0736	86.415	99.0118	72.5581	83.1582	93.2181	79.3337	0.166929	0.0580663	0.354183	FALSE	FALSE
Eif1a	120.033	143.203	140.56	166.225	139.414	157.38	138.023	-0.158498	0.0582038	0.354467	FALSE	FALSE
Fhl3	36.6919	36.436	35.7831	30.5682	34.0738	29.7266	34.4127	0.172933	0.0581678	0.354467	FALSE	FALSE
Plcb4	14.0234	13.2301	12.7342	10.1412	11.8583	11.6924	10.8657	0.257998	0.0582004	0.354467	FALSE	FALSE
Dis3	86.9936	106.154	111.069	123.822	105.19	116.472	108.971	-0.163698	0.0582583	0.354541	FALSE	FALSE
Syce2	18.2746	15.7835	18.2787	20.7368	22.8326	17.4948	21.3024	-0.239129	0.0582766	0.354541	FALSE	FALSE
Ncln	92.4289	101.748	96.122	112.483	103.306	103.336	104.839	-0.130974	0.058394	0.355071	FALSE	FALSE
Tbc1d24	22.2406	20.0266	19.205	16.4201	19.6304	17.2032	16.8132	0.225896	0.0585921	0.35609	FALSE	FALSE
Mrpl17	61.1009	74.5492	64.1136	82.6786	72.5841	78.7557	66.8525	-0.175229	0.0586297	0.356134	FALSE	FALSE
Tmem209	62.7558	61.607	63.2149	57.0261	51.9363	60.3425	56.6159	0.146528	0.0587178	0.356483	FALSE	FALSE
Mcam	23.2534	21.7164	21.1961	27.6559	26.235	22.1163	25.7917	-0.205755	0.0588847	0.357312	FALSE	FALSE
Cdv3	495.47	572.224	589.632	642.861	565.662	625.847	600.729	-0.140042	0.0589527	0.357538	FALSE	FALSE
Sephs2	80.4883	86.6903	82.254	94.0797	86.0602	93.466	90.8142	-0.131729	0.0592138	0.35875	FALSE	FALSE
Tcf25	141.361	140.074	137.961	152.221	150.272	153.633	152.463	-0.122135	0.0592011	0.35875	FALSE	FALSE
Ankrd16	8.30276	7.78536	8.46184	10.3271	10.1905	9.59298	9.77911	-0.284901	0.0595232	0.35895	FALSE	FALSE
Kif13b	19.3018	17.4232	16.1909	11.8555	16.2113	16.5909	13.7394	0.271476	0.0594102	0.35895	FALSE	FALSE
Mlxipl	2.39667	1.82743	1.92189	1.36317	1.53441	1.28295	1.67274	0.482457	0.0593524	0.35895	FALSE	FALSE
Nosip	47.8764	50.4797	48.697	58.947	51.5694	51.216	56.4729	-0.15378	0.0594721	0.35895	FALSE	FALSE
Numa1	398.176	365.349	404.232	318.528	385.036	343.948	357.395	0.148207	0.0595093	0.35895	FALSE	FALSE
Psmd7	218.297	242.623	240.485	274.122	243.754	250.657	255.1	-0.13018	0.0594444	0.35895	FALSE	FALSE
Rab1b	172.532	169.425	173.952	192.869	183.962	179.642	193.638	-0.124899	0.0594963	0.35895	FALSE	FALSE
Rps27l	105.967	121.524	116.571	128.841	122.736	124.388	125.427	-0.128007	0.0593384	0.35895	FALSE	FALSE
Tmem201	80.203	80.7199	81.7701	93.9145	85.3597	86.4243	89.0556	-0.132368	0.0592858	0.35895	FALSE	FALSE
Btaf1	97.907	139.198	120.249	100.648	98.9692	118.279	99.9356	0.189479	0.0596881	0.359574	FALSE	FALSE
Ext2	74.1685	71.0445	72.451	66.1759	64.2616	66.7135	66.8668	0.13639	0.0596881	0.359574	FALSE	FALSE
Gsk3b	205.6	209.391	213.758	179.299	200.007	201.234	184.931	0.13105	0.0597546	0.359741	FALSE	FALSE
Igflr1	1.91163	1.55206	1.78362	2.82962	2.20154	2.07022	2.57345	-0.465765	0.0597773	0.359741	FALSE	FALSE
BC003331	22.7969	22.4424	21.9427	18.7953	19.3969	21.2999	18.4288	0.200677	0.0598698	0.360112	FALSE	FALSE
Pdxp	48.3757	49.5534	50.2871	60.2688	53.1539	50.6474	56.0869	-0.155182	0.059947	0.360206	FALSE	FALSE
Tpi1	437.978	425.416	436.061	450.632	546.332	463.204	462.549	-0.15022	0.0599185	0.360206	FALSE	FALSE
Kcng1	0.998614	2.3281	2.36434	3.61448	1.88465	3.49896	2.61634	-0.610957	0.0601247	0.360873	FALSE	FALSE
Pabpc4	260.667	334.896	331.049	385.613	322.309	365.029	319.694	-0.172634	0.0600985	0.360873	FALSE	FALSE
Sft2d3	13.7381	11.4152	10.6188	9.4183	9.42326	10.7739	9.3359	0.291434	0.0601506	0.360873	FALSE	FALSE
Triobp	73.2127	66.2131	69.7963	57.4392	65.4458	59.5698	67.2814	0.159173	0.0602233	0.360971	FALSE	FALSE
Tspyl3	9.00179	8.23596	7.81199	6.23756	6.48787	7.20202	6.97691	0.31058	0.0602287	0.360971	FALSE	FALSE
Atg16l1	27.0624	28.0999	27.183	32.3238	29.6374	30.3097	31.1101	-0.167852	0.0603047	0.361241	FALSE	FALSE
Vdac2	219.695	225.099	221.266	256.958	235.265	232.856	243.448	-0.12496	0.060375	0.361477	FALSE	FALSE
AI597479	55.0379	54.4975	53.9926	50.6233	50.5687	48.9563	47.2228	0.14398	0.0608777	0.361709	FALSE	FALSE
Acat2	166.54	169.838	154.76	159.306	200.807	175.808	197.326	-0.163305	0.0606785	0.361709	FALSE	FALSE
Atic	179.965	236.327	234.166	288.435	232.813	241.997	224.676	-0.187685	0.060703	0.361709	FALSE	FALSE
Ccdc58	33.7532	35.7976	34.9258	39.8419	36.3754	38.7364	40.1744	-0.155073	0.0607969	0.361709	FALSE	FALSE
Ccnb1	283.164	286.494	286.375	307.148	306.865	305.517	320.566	-0.119702	0.0608536	0.361709	FALSE	FALSE
Crtc2	29.2879	33.094	31.6489	40.3376	33.9404	32.9485	34.8988	-0.179723	0.0606736	0.361709	FALSE	FALSE
Eif2d	50.1019	50.004	49.0565	56.2619	51.4193	55.3856	56.8589	-0.14509	0.0607696	0.361709	FALSE	FALSE
Fzd7	171.548	182.23	196.931	169.034	155.626	183.71	157.238	0.141655	0.0608668	0.361709	FALSE	FALSE
Gldc	59.389	87.8043	88.5313	74.0865	66.8301	62.0482	68.1249	0.213776	0.0604826	0.361709	FALSE	FALSE
Myef2	133.144	149.073	146.534	167.918	146.502	162.177	151.347	-0.135234	0.0606589	0.361709	FALSE	FALSE
Odc1	570.038	750.949	725.049	825.815	691.45	805.154	747.916	-0.170487	0.0608165	0.361709	FALSE	FALSE
Plekhh1	16.3202	23.4437	25.0122	18.3409	17.0119	19.3609	17.5995	0.256496	0.0604565	0.361709	FALSE	FALSE
Tln1	211.293	223.735	238.065	178.473	203.559	232.812	186.303	0.16361	0.0608435	0.361709	FALSE	FALSE
Usp34	232.72	233.824	262.994	197.702	225.174	243.338	209.85	0.150812	0.0606299	0.361709	FALSE	FALSE
[truncated: 9,726 more rows]

## Sheet: Summary
Gene	Expression in Mutant Limbs									Pbx1/Hand2 Predicted Target (ChIP-seq)
[truncated: 11,120 more rows]

[truncated: 3 more sheets: Summary_Numbers, Summary_100kbp, Summary_10kbp]
